# Supplementary material for: Probabilistic model based on circular statistics for quantifying coverage depth dynamics originating from DNA replication
Source: PubMed Central journal article supplement (PMC7104724; doi:10.7717/peerj.8722), 2020-03-27

OX

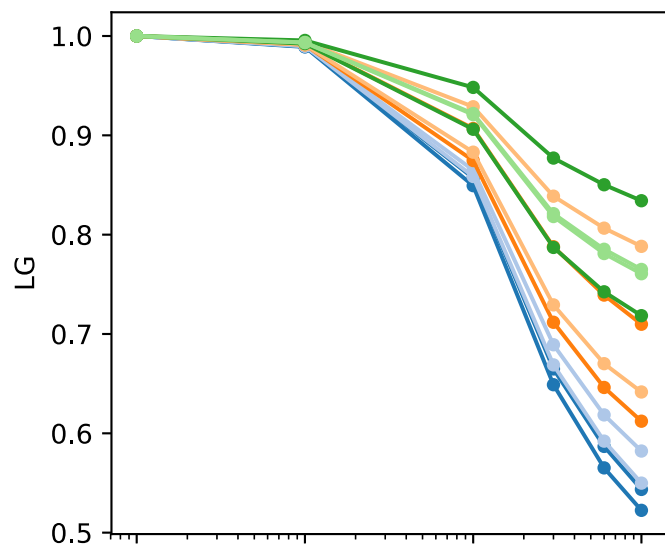

NOX

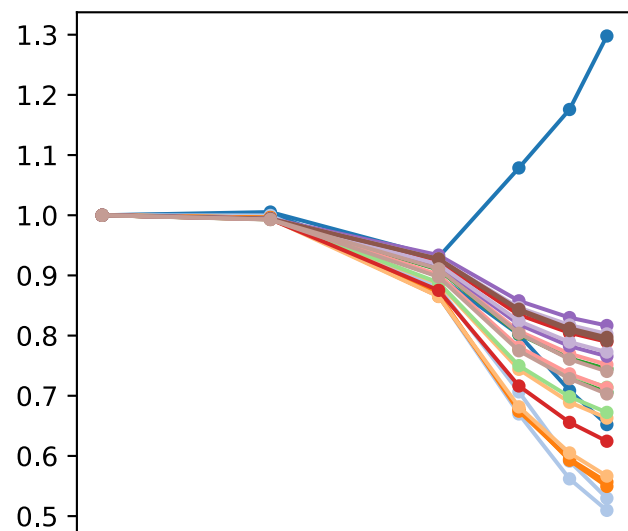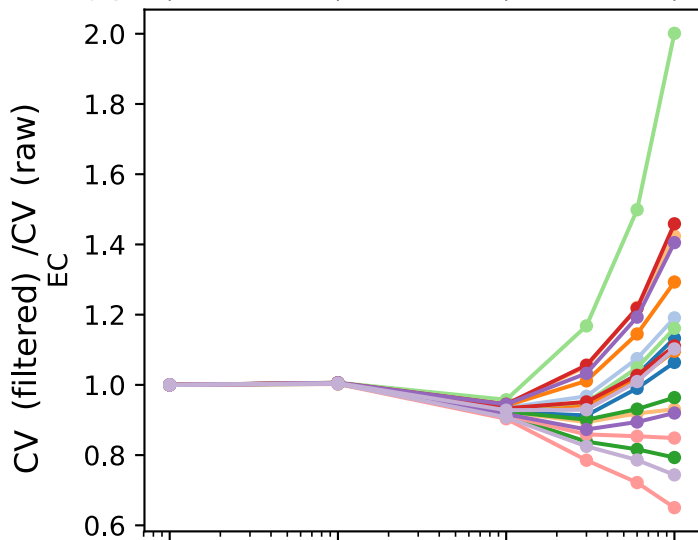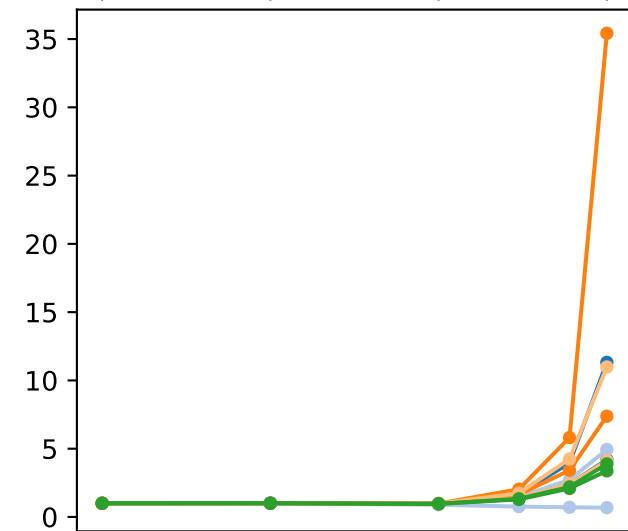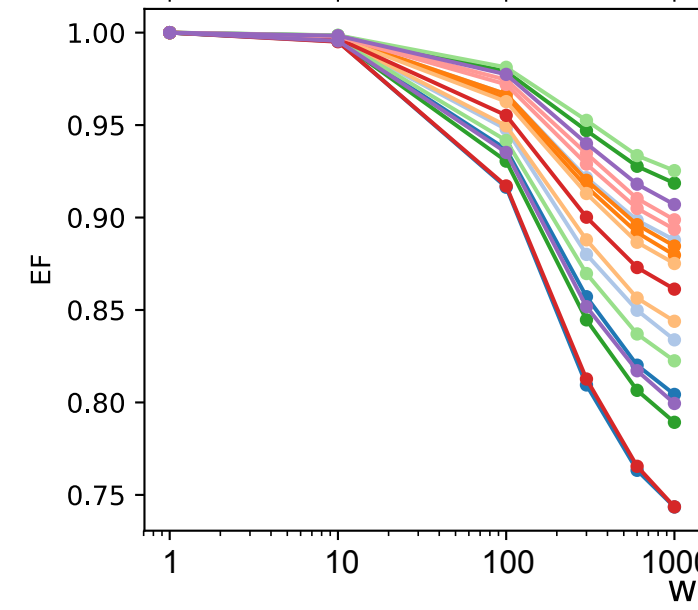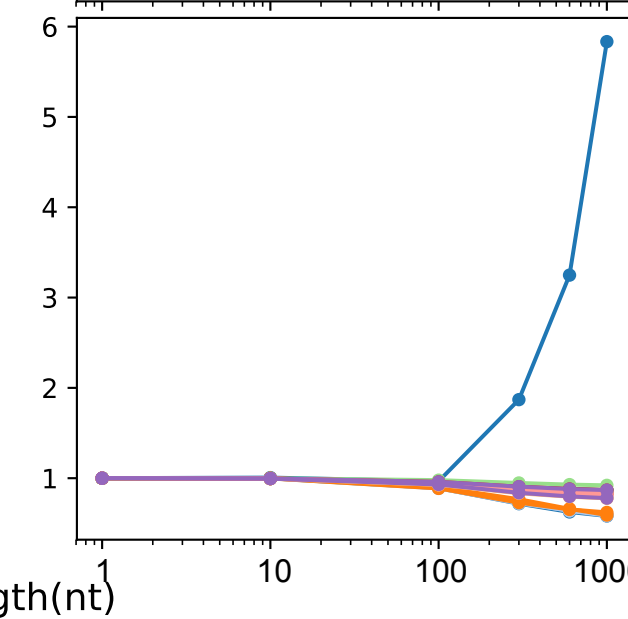

Supplement: peerj-08-8722-s004.pdf [file peerj-08-8722-s004.pdf]
