# Supplementary material for: Probabilistic model based on circular statistics for quantifying coverage depth dynamics originating from DNA replication
Source: PubMed Central journal article supplement (PMC7104724; doi:10.7717/peerj.8722), 2020-03-27

Pearson  $r=0.996$ ,  $p\text{-value}=1.649e-105$

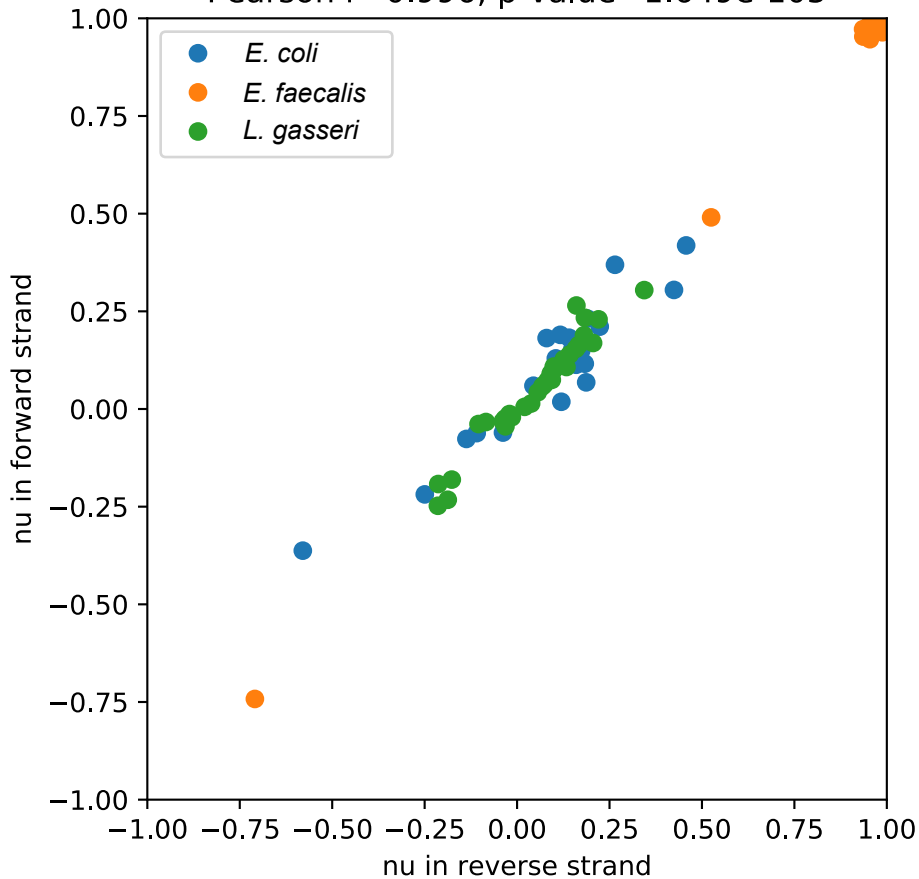

Supplement: peerj-08-8722-s018.pdf [file peerj-08-8722-s018.pdf]
