# Supplementary material for: Probabilistic model based on circular statistics for quantifying coverage depth dynamics originating from DNA replication
Source: PeerJ. 2020 Mar 27;8:e8722. doi: 10.7717/peerj.8722 (PMC7104724; doi:10.7717/peerj.8722)
Supplement: Tabale S4 [file peerj-08-8722-s023.xlsx]

## Sheet: シート1
Supplementary table 4: Odds ratio of the sequence feature frequency in the skewed region at both ends.
	Intact phage	Incomplete phage	Duplicate gene
Lower end	0.49±5.7*104	0.03±1.0*10-4	0.02±8.2*10-5
Upper end	5.3*10-3±4.0*10-5	2.4*10-3±2.7*10-5	3.6*10-3±3.3*10-5
Overall sequence	0.05±1.8*10-4	0.02±9.7*10-5	0.02±9.2*10-5
