# Supplementary material for: Probabilistic model based on circular statistics for quantifying coverage depth dynamics originating from DNA replication
Source: PeerJ. 2020 Mar 27;8:e8722. doi: 10.7717/peerj.8722 (PMC7104724; doi:10.7717/peerj.8722)
Supplement: Table S1 [file peerj-08-8722-s020.xlsx]

## Sheet: シート1
Supplementary table 1: Software versions
Porpose	Name	Version
Model	Python	3.6.1(miniconda3 4.1.1)
Model	PyStan	2.17.1
Model	Numpy	1.14.3
Model	Pandas	0.22.0
Model	Scipy	1.1.0
Model	Sympy	1.1.1
Model	CmdStan	2.19.1
Bioinformatics	samtools	1.3.1
Bioinformatics	bowtie2	2.2.9
Bioinformatics	sratoolkit	2.8.2-1
Bioinformatics	iRep	1.1.7
Bioinformatics	PTRC	1.1.0
Bioinformatics	DEMIC	1.0.2
Bioinformatics	GRiD	1.2
Bioinformatics	vg	1.12.1
Bioinformatics	Trimmomatic	0.38
Visualization	matplotlib	2.17.1
Visualization	seaborn	0.8.1
