# Supplementary material for: Probabilistic model based on circular statistics for quantifying coverage depth dynamics originating from DNA replication
Source: PeerJ. 2020 Mar 27;8:e8722. doi: 10.7717/peerj.8722 (PMC7104724; doi:10.7717/peerj.8722)
Supplement: Table S2 [file peerj-08-8722-s021.xlsx]

## Sheet: Sheet1
Supplementary table 2: Genome and metagenome sequences used to verify the parameter set of the moving median filter.
Cohort	Accession ID	Type
CCC	GCF_000007325.1	Genome
CCC	GCF_000009925.1	Genome
CCC	GCF_000011705.1	Genome
CCC	GCF_000023905.1	Genome
CCC	GCF_000024565.1	Genome
CCC	GCF_000026605.1	Genome
CCC	GCF_000163895.2	Genome
CCC	GCF_000203895.1	Genome
CCC	GCF_000240185.1	Genome
CCC	GCF_000317855.1	Genome
CCC	GCF_000800295.1	Genome
CCC	GCF_001953955.1	Genome
CCC	ERR1018185	Metagenome
CCC	ERR1018186	Metagenome
CCC	ERR1018187	Metagenome
CCC	ERR1018188	Metagenome
CCC	ERR1018189	Metagenome
CCC	ERR1018190	Metagenome
CCC	ERR1018191	Metagenome
CCC	ERR1018192	Metagenome
CCC	ERR1018193	Metagenome
CCC	ERR1018194	Metagenome
CCC	ERR1018195	Metagenome
CCC	ERR1018196	Metagenome
CCC	ERR1018197	Metagenome
CCC	ERR1018198	Metagenome
CCC	ERR1018199	Metagenome
CCC	ERR1018200	Metagenome
CCC	ERR1018201	Metagenome
CCC	ERR1018202	Metagenome
CCC	ERR1018203	Metagenome
CCC	ERR1018204	Metagenome
CCC	ERR1018205	Metagenome
CCC	ERR1018206	Metagenome
CCC	ERR1018207	Metagenome
CCC	ERR1018208	Metagenome
CCC	ERR1018209	Metagenome
CCC	ERR1018210	Metagenome
CCC	ERR1018211	Metagenome
CCC	ERR1018212	Metagenome
CCC	ERR1018213	Metagenome
CCC	ERR1018214	Metagenome
CCC	ERR1018215	Metagenome
CCC	ERR1018216	Metagenome
CCC	ERR1018217	Metagenome
CCC	ERR1018218	Metagenome
CCC	ERR1018219	Metagenome
CCC	ERR1018220	Metagenome
CCC	ERR1018221	Metagenome
CCC	ERR1018222	Metagenome
CCC	ERR1018223	Metagenome
CCC	ERR1018224	Metagenome
CCC	ERR1018225	Metagenome
CCC	ERR1018226	Metagenome
CCC	ERR1018227	Metagenome
CCC	ERR1018228	Metagenome
CCC	ERR1018229	Metagenome
CCC	ERR1018230	Metagenome
CCC	ERR1018231	Metagenome
CCC	ERR1018232	Metagenome
CCC	ERR1018233	Metagenome
CCC	ERR1018234	Metagenome
CCC	ERR1018235	Metagenome
CCC	ERR1018236	Metagenome
CCC	ERR1018237	Metagenome
CCC	ERR1018238	Metagenome
CCC	ERR1018239	Metagenome
CCC	ERR1018240	Metagenome
CCC	ERR1018241	Metagenome
CCC	ERR1018242	Metagenome
CCC	ERR1018243	Metagenome
CCC	ERR1018244	Metagenome
CCC	ERR1018245	Metagenome
CCC	ERR1018246	Metagenome
CCC	ERR1018247	Metagenome
CCC	ERR1018248	Metagenome
CCC	ERR1018249	Metagenome
CCC	ERR1018250	Metagenome
CCC	ERR1018251	Metagenome
CCC	ERR1018252	Metagenome
CCC	ERR1018253	Metagenome
CCC	ERR1018254	Metagenome
CCC	ERR1018255	Metagenome
CCC	ERR1018256	Metagenome
CCC	ERR1018257	Metagenome
CCC	ERR1018258	Metagenome
CCC	ERR1018259	Metagenome
CCC	ERR1018260	Metagenome
CCC	ERR1018261	Metagenome
CCC	ERR1018262	Metagenome
CCC	ERR1018263	Metagenome
CCC	ERR1018264	Metagenome
CCC	ERR1018265	Metagenome
CCC	ERR1018266	Metagenome
CCC	ERR1018267	Metagenome
CCC	ERR1018268	Metagenome
CCC	ERR1018269	Metagenome
CCC	ERR1018270	Metagenome
CCC	ERR1018271	Metagenome
CCC	ERR1018272	Metagenome
CCC	ERR1018273	Metagenome
CCC	ERR1018274	Metagenome
CCC	ERR1018275	Metagenome
CCC	ERR1018276	Metagenome
CCC	ERR1018277	Metagenome
CCC	ERR1018278	Metagenome
CCC	ERR1018279	Metagenome
CCC	ERR1018280	Metagenome
CCC	ERR1018281	Metagenome
CCC	ERR1018282	Metagenome
CCC	ERR1018283	Metagenome
CCC	ERR1018284	Metagenome
CCC	ERR1018285	Metagenome
CCC	ERR1018286	Metagenome
CCC	ERR1018287	Metagenome
CCC	ERR1018288	Metagenome
CCC	ERR1018289	Metagenome
CCC	ERR1018290	Metagenome
CCC	ERR1018291	Metagenome
CCC	ERR1018292	Metagenome
CCC	ERR1018293	Metagenome
CCC	ERR1018294	Metagenome
CCC	ERR1018295	Metagenome
CCC	ERR1018296	Metagenome
CCC	ERR1018297	Metagenome
CCC	ERR1018298	Metagenome
CCC	ERR1018299	Metagenome
CCC	ERR1018300	Metagenome
CCC	ERR1018301	Metagenome
CCC	ERR1018302	Metagenome
CCC	ERR1018303	Metagenome
CCC	ERR1018304	Metagenome
CCC	ERR1018305	Metagenome
CCC	ERR1018306	Metagenome
CCC	ERR1018307	Metagenome
CCC	ERR1018308	Metagenome
CCC	ERR1018309	Metagenome
CCC	ERR1018310	Metagenome
CCC	ERR1018311	Metagenome
CCC	ERR1018312	Metagenome
IBD	GCF_000005845.2	Genome
IBD	GCF_000007525.1	Genome
IBD	GCF_000009925.1	Genome
IBD	GCF_000010425.1	Genome
IBD	GCF_000011065.1	Genome
IBD	GCF_000012825.1	Genome
IBD	GCF_000014425.1	Genome
IBD	GCF_000020225.1	Genome
IBD	GCF_000165905.1	Genome
IBD	GCF_000174395.2	Genome
IBD	GCF_000240185.1	Genome
IBD	GCF_000253395.1	Genome
IBD	GCF_000785515.1	Genome
IBD	GCF_001314995.1	Genome
IBD	GCF_002222615.2	Genome
IBD	SRR6468499	Metagenome
IBD	SRR6468500	Metagenome
IBD	SRR6468501	Metagenome
IBD	SRR6468502	Metagenome
IBD	SRR6468503	Metagenome
IBD	SRR6468504	Metagenome
IBD	SRR6468505	Metagenome
IBD	SRR6468506	Metagenome
IBD	SRR6468507	Metagenome
IBD	SRR6468508	Metagenome
IBD	SRR6468509	Metagenome
IBD	SRR6468510	Metagenome
IBD	SRR6468511	Metagenome
IBD	SRR6468512	Metagenome
IBD	SRR6468513	Metagenome
IBD	SRR6468514	Metagenome
IBD	SRR6468515	Metagenome
IBD	SRR6468516	Metagenome
IBD	SRR6468517	Metagenome
IBD	SRR6468518	Metagenome
IBD	SRR6468519	Metagenome
IBD	SRR6468520	Metagenome
IBD	SRR6468521	Metagenome
IBD	SRR6468522	Metagenome
IBD	SRR6468523	Metagenome
IBD	SRR6468524	Metagenome
IBD	SRR6468525	Metagenome
IBD	SRR6468526	Metagenome
IBD	SRR6468527	Metagenome
IBD	SRR6468528	Metagenome
IBD	SRR6468529	Metagenome
IBD	SRR6468530	Metagenome
IBD	SRR6468531	Metagenome
IBD	SRR6468532	Metagenome
IBD	SRR6468533	Metagenome
IBD	SRR6468534	Metagenome
IBD	SRR6468535	Metagenome
IBD	SRR6468536	Metagenome
IBD	SRR6468537	Metagenome
IBD	SRR6468538	Metagenome
IBD	SRR6468539	Metagenome
IBD	SRR6468540	Metagenome
IBD	SRR6468541	Metagenome
IBD	SRR6468542	Metagenome
IBD	SRR6468543	Metagenome
IBD	SRR6468544	Metagenome
IBD	SRR6468545	Metagenome
IBD	SRR6468546	Metagenome
IBD	SRR6468547	Metagenome
IBD	SRR6468548	Metagenome
IBD	SRR6468549	Metagenome
IBD	SRR6468550	Metagenome
IBD	SRR6468551	Metagenome
IBD	SRR6468552	Metagenome
IBD	SRR6468553	Metagenome
IBD	SRR6468554	Metagenome
IBD	SRR6468555	Metagenome
IBD	SRR6468556	Metagenome
IBD	SRR6468557	Metagenome
IBD	SRR6468558	Metagenome
IBD	SRR6468559	Metagenome
IBD	SRR6468560	Metagenome
IBD	SRR6468561	Metagenome
IBD	SRR6468562	Metagenome
IBD	SRR6468563	Metagenome
IBD	SRR6468564	Metagenome
IBD	SRR6468565	Metagenome
IBD	SRR6468566	Metagenome
IBD	SRR6468567	Metagenome
IBD	SRR6468568	Metagenome
IBD	SRR6468569	Metagenome
IBD	SRR6468570	Metagenome
IBD	SRR6468571	Metagenome
IBD	SRR6468572	Metagenome
IBD	SRR6468573	Metagenome
IBD	SRR6468574	Metagenome
IBD	SRR6468575	Metagenome
IBD	SRR6468576	Metagenome
IBD	SRR6468577	Metagenome
IBD	SRR6468578	Metagenome
IBD	SRR6468579	Metagenome
IBD	SRR6468580	Metagenome
IBD	SRR6468581	Metagenome
IBD	SRR6468582	Metagenome
IBD	SRR6468583	Metagenome
IBD	SRR6468584	Metagenome
IBD	SRR6468585	Metagenome
IBD	SRR6468586	Metagenome
IBD	SRR6468587	Metagenome
IBD	SRR6468588	Metagenome
IBD	SRR6468589	Metagenome
IBD	SRR6468590	Metagenome
IBD	SRR6468591	Metagenome
IBD	SRR6468592	Metagenome
IBD	SRR6468593	Metagenome
IBD	SRR6468594	Metagenome
IBD	SRR6468595	Metagenome
IBD	SRR6468596	Metagenome
IBD	SRR6468597	Metagenome
IBD	SRR6468598	Metagenome
IBD	SRR6468599	Metagenome
IBD	SRR6468600	Metagenome
IBD	SRR6468601	Metagenome
IBD	SRR6468602	Metagenome
IBD	SRR6468603	Metagenome
IBD	SRR6468604	Metagenome
IBD	SRR6468605	Metagenome
IBD	SRR6468606	Metagenome
IBD	SRR6468607	Metagenome
IBD	SRR6468608	Metagenome
IBD	SRR6468609	Metagenome
IBD	SRR6468610	Metagenome
IBD	SRR6468611	Metagenome
IBD	SRR6468612	Metagenome
IBD	SRR6468613	Metagenome
IBD	SRR6468614	Metagenome
IBD	SRR6468615	Metagenome
IBD	SRR6468616	Metagenome
IBD	SRR6468617	Metagenome
IBD	SRR6468618	Metagenome
IBD	SRR6468619	Metagenome
IBD	SRR6468620	Metagenome
IBD	SRR6468621	Metagenome
IBD	SRR6468622	Metagenome
IBD	SRR6468623	Metagenome
IBD	SRR6468624	Metagenome
IBD	SRR6468625	Metagenome
IBD	SRR6468626	Metagenome
IBD	SRR6468627	Metagenome
IBD	SRR6468628	Metagenome
IBD	SRR6468629	Metagenome
IBD	SRR6468630	Metagenome
IBD	SRR6468631	Metagenome
IBD	SRR6468632	Metagenome
IBD	SRR6468633	Metagenome
IBD	SRR6468634	Metagenome
IBD	SRR6468635	Metagenome
IBD	SRR6468636	Metagenome
IBD	SRR6468637	Metagenome
IBD	SRR6468638	Metagenome
IBD	SRR6468639	Metagenome
IBD	SRR6468640	Metagenome
IBD	SRR6468641	Metagenome
IBD	SRR6468642	Metagenome
IBD	SRR6468643	Metagenome
IBD	SRR6468644	Metagenome
IBD	SRR6468645	Metagenome
IBD	SRR6468646	Metagenome
IBD	SRR6468647	Metagenome
IBD	SRR6468648	Metagenome
IBD	SRR6468649	Metagenome
IBD	SRR6468650	Metagenome
IBD	SRR6468651	Metagenome
IBD	SRR6468652	Metagenome
IBD	SRR6468653	Metagenome
IBD	SRR6468654	Metagenome
IBD	SRR6468655	Metagenome
IBD	SRR6468656	Metagenome
IBD	SRR6468657	Metagenome
IBD	SRR6468658	Metagenome
IBD	SRR6468659	Metagenome
IBD	SRR6468660	Metagenome
IBD	SRR6468661	Metagenome
IBD	SRR6468662	Metagenome
IBD	SRR6468663	Metagenome
IBD	SRR6468664	Metagenome
IBD	SRR6468665	Metagenome
IBD	SRR6468666	Metagenome
IBD	SRR6468667	Metagenome
IBD	SRR6468668	Metagenome
IBD	SRR6468669	Metagenome
IBD	SRR6468670	Metagenome
IBD	SRR6468671	Metagenome
IBD	SRR6468672	Metagenome
IBD	SRR6468673	Metagenome
IBD	SRR6468674	Metagenome
IBD	SRR6468675	Metagenome
IBD	SRR6468676	Metagenome
IBD	SRR6468677	Metagenome
IBD	SRR6468678	Metagenome
IBD	SRR6468679	Metagenome
IBD	SRR6468680	Metagenome
IBD	SRR6468681	Metagenome
IBD	SRR6468682	Metagenome
IBD	SRR6468683	Metagenome
IBD	SRR6468684	Metagenome
IBD	SRR6468685	Metagenome
IBD	SRR6468686	Metagenome
IBD	SRR6468687	Metagenome
IBD	SRR6468688	Metagenome
IBD	SRR6468689	Metagenome
IBD	SRR6468690	Metagenome
IBD	SRR6468691	Metagenome
IBD	SRR6468692	Metagenome
IBD	SRR6468693	Metagenome
IBD	SRR6468694	Metagenome
IBD	SRR6468695	Metagenome
IBD	SRR6468696	Metagenome
IBD	SRR6468697	Metagenome
IBD	SRR6468698	Metagenome
IBD	SRR6468699	Metagenome
IBD	SRR6468700	Metagenome
IBD	SRR6468701	Metagenome
IBD	SRR6468702	Metagenome
IBD	SRR6468703	Metagenome
IBD	SRR6468704	Metagenome
IBD	SRR6468705	Metagenome
IBD	SRR6468706	Metagenome
IBD	SRR6468707	Metagenome
IBD	SRR6468708	Metagenome
IBD	SRR6468709	Metagenome
IBD	SRR6468710	Metagenome
IBD	SRR6468711	Metagenome
IBD	SRR6468712	Metagenome
IBD	SRR6468713	Metagenome
IBD	SRR6468714	Metagenome
IBD	SRR6468715	Metagenome
IBD	SRR6468716	Metagenome
IBD	SRR6468717	Metagenome
IBD	SRR6468718	Metagenome
Infant	ERR525688	Metagenome
Infant	ERR525689	Metagenome
Infant	ERR525690	Metagenome
Infant	ERR525691	Metagenome
Infant	ERR525692	Metagenome
Infant	ERR525693	Metagenome
Infant	ERR525694	Metagenome
Infant	ERR525695	Metagenome
Infant	ERR525696	Metagenome
Infant	ERR525697	Metagenome
Infant	ERR525698	Metagenome
Infant	ERR525699	Metagenome
Infant	ERR525700	Metagenome
Infant	ERR525701	Metagenome
Infant	ERR525702	Metagenome
Infant	ERR525703	Metagenome
Infant	ERR525704	Metagenome
Infant	ERR525705	Metagenome
Infant	ERR525706	Metagenome
Infant	ERR525707	Metagenome
Infant	ERR525708	Metagenome
Infant	ERR525709	Metagenome
Infant	ERR525710	Metagenome
Infant	ERR525711	Metagenome
Infant	ERR525712	Metagenome
Infant	ERR525713	Metagenome
Infant	ERR525714	Metagenome
Infant	ERR525715	Metagenome
Infant	ERR525716	Metagenome
Infant	ERR525717	Metagenome
Infant	ERR525718	Metagenome
Infant	ERR525719	Metagenome
Infant	ERR525720	Metagenome
Infant	ERR525721	Metagenome
Infant	ERR525722	Metagenome
Infant	ERR525723	Metagenome
Infant	ERR525724	Metagenome
Infant	ERR525725	Metagenome
Infant	ERR525726	Metagenome
Infant	ERR525727	Metagenome
Infant	ERR525728	Metagenome
Infant	ERR525729	Metagenome
Infant	ERR525730	Metagenome
Infant	ERR525731	Metagenome
Infant	ERR525732	Metagenome
Infant	ERR525733	Metagenome
Infant	ERR525734	Metagenome
Infant	ERR525735	Metagenome
Infant	ERR525736	Metagenome
Infant	ERR525737	Metagenome
Infant	ERR525738	Metagenome
Infant	ERR525739	Metagenome
Infant	ERR525740	Metagenome
Infant	ERR525741	Metagenome
Infant	ERR525742	Metagenome
Infant	ERR525743	Metagenome
Infant	ERR525744	Metagenome
Infant	ERR525745	Metagenome
Infant	ERR525746	Metagenome
Infant	ERR525747	Metagenome
Infant	ERR525748	Metagenome
Infant	ERR525749	Metagenome
Infant	ERR525750	Metagenome
Infant	ERR525751	Metagenome
Infant	ERR525752	Metagenome
Infant	ERR525753	Metagenome
Infant	ERR525754	Metagenome
Infant	ERR525755	Metagenome
Infant	ERR525756	Metagenome
Infant	ERR525757	Metagenome
Infant	ERR525758	Metagenome
Infant	ERR525759	Metagenome
Infant	ERR525760	Metagenome
Infant	ERR525761	Metagenome
Infant	ERR525762	Metagenome
Infant	ERR525763	Metagenome
Infant	ERR525764	Metagenome
Infant	ERR525765	Metagenome
Infant	ERR525766	Metagenome
Infant	ERR525767	Metagenome
Infant	ERR525768	Metagenome
Infant	ERR525769	Metagenome
Infant	ERR525770	Metagenome
Infant	ERR525771	Metagenome
Infant	ERR525772	Metagenome
Infant	ERR525773	Metagenome
Infant	ERR525774	Metagenome
Infant	ERR525775	Metagenome
Infant	ERR525776	Metagenome
Infant	ERR525777	Metagenome
Infant	ERR525778	Metagenome
Infant	ERR525779	Metagenome
Infant	ERR525780	Metagenome
Infant	ERR525781	Metagenome
Infant	ERR525782	Metagenome
Infant	ERR525783	Metagenome
Infant	ERR525784	Metagenome
Infant	ERR525785	Metagenome
Infant	ERR525786	Metagenome
Infant	ERR525787	Metagenome
Infant	ERR525788	Metagenome
Infant	ERR525789	Metagenome
Infant	ERR525790	Metagenome
Infant	ERR525791	Metagenome
Infant	ERR525792	Metagenome
Infant	ERR525793	Metagenome
Infant	ERR525794	Metagenome
Infant	ERR525795	Metagenome
Infant	ERR525796	Metagenome
Infant	ERR525797	Metagenome
Infant	ERR525798	Metagenome
Infant	ERR525799	Metagenome
Infant	ERR525800	Metagenome
Infant	ERR525801	Metagenome
Infant	ERR525802	Metagenome
Infant	ERR525803	Metagenome
Infant	ERR525804	Metagenome
Infant	ERR525805	Metagenome
Infant	ERR525806	Metagenome
Infant	ERR525807	Metagenome
Infant	ERR525808	Metagenome
Infant	ERR525809	Metagenome
Infant	ERR525810	Metagenome
Infant	ERR525811	Metagenome
Infant	ERR525812	Metagenome
Infant	ERR525813	Metagenome
Infant	ERR525814	Metagenome
Infant	ERR525815	Metagenome
Infant	ERR525816	Metagenome
Infant	ERR525817	Metagenome
Infant	ERR525818	Metagenome
Infant	ERR525819	Metagenome
Infant	ERR525820	Metagenome
Infant	ERR525821	Metagenome
Infant	ERR525822	Metagenome
Infant	ERR525823	Metagenome
Infant	ERR525824	Metagenome
Infant	ERR525825	Metagenome
Infant	ERR525826	Metagenome
Infant	ERR525827	Metagenome
Infant	ERR525828	Metagenome
Infant	ERR525829	Metagenome
Infant	ERR525830	Metagenome
Infant	ERR525831	Metagenome
Infant	ERR525832	Metagenome
Infant	ERR525833	Metagenome
Infant	ERR525834	Metagenome
Infant	ERR525835	Metagenome
Infant	ERR525836	Metagenome
Infant	ERR525837	Metagenome
Infant	ERR525838	Metagenome
Infant	ERR525839	Metagenome
Infant	ERR525840	Metagenome
Infant	ERR525841	Metagenome
Infant	ERR525842	Metagenome
Infant	ERR525843	Metagenome
Infant	ERR525844	Metagenome
Infant	ERR525845	Metagenome
Infant	ERR525846	Metagenome
Infant	ERR525847	Metagenome
Infant	ERR525848	Metagenome
Infant	ERR525849	Metagenome
Infant	ERR525850	Metagenome
Infant	ERR525851	Metagenome
Infant	ERR525852	Metagenome
Infant	ERR525853	Metagenome
Infant	ERR525854	Metagenome
Infant	ERR525855	Metagenome
Infant	ERR525856	Metagenome
Infant	ERR525857	Metagenome
Infant	ERR525858	Metagenome
Infant	ERR525859	Metagenome
Infant	ERR525860	Metagenome
Infant	ERR525861	Metagenome
Infant	ERR525862	Metagenome
Infant	ERR525863	Metagenome
Infant	ERR525864	Metagenome
Infant	ERR525865	Metagenome
Infant	ERR525866	Metagenome
Infant	ERR525867	Metagenome
Infant	ERR525868	Metagenome
Infant	ERR525869	Metagenome
Infant	ERR525870	Metagenome
Infant	ERR525871	Metagenome
Infant	ERR525872	Metagenome
Infant	ERR525873	Metagenome
Infant	ERR525874	Metagenome
Infant	ERR525875	Metagenome
Infant	ERR525876	Metagenome
Infant	ERR525877	Metagenome
Infant	ERR525878	Metagenome
Infant	ERR525879	Metagenome
Infant	ERR525880	Metagenome
Infant	ERR525881	Metagenome
Infant	ERR525882	Metagenome
Infant	ERR525883	Metagenome
Infant	ERR525884	Metagenome
Infant	ERR525885	Metagenome
Infant	ERR525886	Metagenome
Infant	ERR525887	Metagenome
Infant	ERR525888	Metagenome
Infant	ERR525889	Metagenome
Infant	ERR525890	Metagenome
Infant	ERR525891	Metagenome
Infant	ERR525892	Metagenome
Infant	ERR525893	Metagenome
Infant	ERR525894	Metagenome
Infant	ERR525895	Metagenome
Infant	ERR525896	Metagenome
Infant	ERR525897	Metagenome
Infant	ERR525898	Metagenome
Infant	ERR525899	Metagenome
Infant	ERR525900	Metagenome
Infant	ERR525901	Metagenome
Infant	ERR525902	Metagenome
Infant	ERR525903	Metagenome
Infant	ERR525904	Metagenome
Infant	ERR525905	Metagenome
Infant	ERR525906	Metagenome
Infant	ERR525907	Metagenome
Infant	ERR525908	Metagenome
Infant	ERR525909	Metagenome
Infant	ERR525910	Metagenome
Infant	ERR525911	Metagenome
Infant	ERR525912	Metagenome
Infant	ERR525913	Metagenome
Infant	ERR525914	Metagenome
Infant	ERR525915	Metagenome
Infant	ERR525916	Metagenome
Infant	ERR525917	Metagenome
Infant	ERR525918	Metagenome
Infant	ERR525919	Metagenome
Infant	ERR525920	Metagenome
Infant	ERR525921	Metagenome
Infant	ERR525922	Metagenome
Infant	ERR525923	Metagenome
Infant	ERR525924	Metagenome
Infant	ERR525925	Metagenome
Infant	ERR525926	Metagenome
Infant	ERR525927	Metagenome
Infant	ERR525928	Metagenome
Infant	ERR525929	Metagenome
Infant	ERR525930	Metagenome
Infant	ERR525931	Metagenome
Infant	ERR525932	Metagenome
Infant	ERR525933	Metagenome
Infant	ERR525934	Metagenome
Infant	ERR525935	Metagenome
Infant	ERR525936	Metagenome
Infant	ERR525937	Metagenome
Infant	ERR525938	Metagenome
Infant	ERR525939	Metagenome
Infant	ERR525940	Metagenome
Infant	ERR525941	Metagenome
Infant	ERR525942	Metagenome
Infant	ERR525943	Metagenome
Infant	ERR525944	Metagenome
Infant	ERR525945	Metagenome
Infant	ERR525946	Metagenome
Infant	ERR525947	Metagenome
Infant	ERR525948	Metagenome
Infant	ERR525949	Metagenome
Infant	ERR525950	Metagenome
Infant	ERR525951	Metagenome
Infant	ERR525952	Metagenome
Infant	ERR525953	Metagenome
Infant	ERR525954	Metagenome
Infant	ERR525955	Metagenome
Infant	ERR525956	Metagenome
Infant	ERR525957	Metagenome
Infant	ERR525958	Metagenome
Infant	ERR525959	Metagenome
Infant	ERR525960	Metagenome
Infant	ERR525961	Metagenome
Infant	ERR525962	Metagenome
Infant	ERR525963	Metagenome
Infant	ERR525964	Metagenome
Infant	ERR525965	Metagenome
Infant	ERR525966	Metagenome
Infant	ERR525967	Metagenome
Infant	ERR525968	Metagenome
Infant	ERR525969	Metagenome
Infant	ERR525970	Metagenome
Infant	ERR525971	Metagenome
Infant	ERR525972	Metagenome
Infant	ERR525973	Metagenome
Infant	ERR525974	Metagenome
Infant	ERR525975	Metagenome
Infant	ERR525976	Metagenome
Infant	ERR525977	Metagenome
Infant	ERR525978	Metagenome
Infant	ERR525979	Metagenome
Infant	ERR525980	Metagenome
Infant	ERR525981	Metagenome
Infant	ERR525982	Metagenome
Infant	ERR525983	Metagenome
Infant	ERR525984	Metagenome
Infant	ERR525985	Metagenome
Infant	ERR525986	Metagenome
Infant	ERR525987	Metagenome
Infant	ERR525988	Metagenome
Infant	ERR525989	Metagenome
Infant	ERR525990	Metagenome
Infant	ERR525991	Metagenome
Infant	ERR525992	Metagenome
Infant	ERR525993	Metagenome
Infant	ERR525994	Metagenome
Infant	ERR525995	Metagenome
Infant	ERR525996	Metagenome
Infant	ERR525997	Metagenome
Infant	ERR525998	Metagenome
Infant	ERR525999	Metagenome
Infant	ERR526000	Metagenome
Infant	ERR526001	Metagenome
Infant	ERR526002	Metagenome
Infant	ERR526003	Metagenome
Infant	ERR526004	Metagenome
Infant	ERR526005	Metagenome
Infant	ERR526006	Metagenome
Infant	ERR526007	Metagenome
Infant	ERR526008	Metagenome
Infant	ERR526009	Metagenome
Infant	ERR526010	Metagenome
Infant	ERR526011	Metagenome
Infant	ERR526012	Metagenome
Infant	ERR526013	Metagenome
Infant	ERR526014	Metagenome
Infant	ERR526015	Metagenome
Infant	ERR526016	Metagenome
Infant	ERR526017	Metagenome
Infant	ERR526018	Metagenome
Infant	ERR526019	Metagenome
Infant	ERR526020	Metagenome
Infant	ERR526021	Metagenome
Infant	ERR526022	Metagenome
Infant	ERR526023	Metagenome
Infant	ERR526024	Metagenome
Infant	ERR526025	Metagenome
Infant	ERR526026	Metagenome
Infant	ERR526027	Metagenome
Infant	ERR526028	Metagenome
Infant	ERR526029	Metagenome
Infant	ERR526030	Metagenome
Infant	ERR526031	Metagenome
Infant	ERR526032	Metagenome
Infant	ERR526033	Metagenome
Infant	ERR526034	Metagenome
Infant	ERR526035	Metagenome
Infant	ERR526036	Metagenome
Infant	ERR526037	Metagenome
Infant	ERR526038	Metagenome
Infant	ERR526039	Metagenome
Infant	ERR526040	Metagenome
Infant	ERR526041	Metagenome
Infant	ERR526042	Metagenome
Infant	ERR526043	Metagenome
Infant	ERR526044	Metagenome
Infant	ERR526045	Metagenome
Infant	ERR526046	Metagenome
Infant	ERR526047	Metagenome
Infant	ERR526048	Metagenome
Infant	ERR526049	Metagenome
Infant	ERR526050	Metagenome
Infant	ERR526051	Metagenome
Infant	ERR526052	Metagenome
Infant	ERR526053	Metagenome
Infant	ERR526054	Metagenome
Infant	ERR526055	Metagenome
Infant	ERR526056	Metagenome
Infant	ERR526057	Metagenome
Infant	ERR526058	Metagenome
Infant	ERR526059	Metagenome
Infant	ERR526060	Metagenome
Infant	ERR526061	Metagenome
Infant	ERR526062	Metagenome
Infant	ERR526063	Metagenome
Infant	ERR526064	Metagenome
Infant	ERR526065	Metagenome
Infant	ERR526066	Metagenome
Infant	ERR526067	Metagenome
Infant	ERR526068	Metagenome
Infant	ERR526069	Metagenome
Infant	ERR526070	Metagenome
Infant	ERR526071	Metagenome
Infant	ERR526072	Metagenome
Infant	ERR526073	Metagenome
Infant	ERR526074	Metagenome
Infant	ERR526075	Metagenome
Infant	ERR526076	Metagenome
Infant	ERR526077	Metagenome
Infant	ERR526078	Metagenome
Infant	ERR526079	Metagenome
Infant	ERR526080	Metagenome
Infant	ERR526081	Metagenome
Infant	ERR526082	Metagenome
Infant	ERR526083	Metagenome
Infant	ERR526084	Metagenome
Infant	ERR526085	Metagenome
Infant	ERR526086	Metagenome
Infant	ERR526087	Metagenome
Infant	GCF_000006765.1	Genome
Infant	GCF_000006785.2	Genome
Infant	GCF_000006865.1	Genome
Infant	GCF_000006925.2	Genome
Infant	GCF_000007045.1	Genome
Infant	GCF_000007265.1	Genome
Infant	GCF_000007465.2	Genome
Infant	GCF_000007525.1	Genome
Infant	GCF_000007625.1	Genome
Infant	GCF_000007645.1	Genome
Infant	GCF_000007785.1	Genome
Infant	GCF_000008925.1	Genome
Infant	GCF_000009085.1	Genome
Infant	GCF_000009345.1	Genome
Infant	GCF_000009865.1	Genome
Infant	GCF_000010125.1	Genome
Infant	GCF_000010145.1	Genome
Infant	GCF_000010185.1	Genome
Infant	GCF_000010425.1	Genome
Infant	GCF_000011025.1	Genome
Infant	GCF_000011065.1	Genome
Infant	GCF_000011985.1	Genome
Infant	GCF_000012005.1	Genome
Infant	GCF_000012825.1	Genome
Infant	GCF_000012845.1	Genome
Infant	GCF_000013285.1	Genome
Infant	GCF_000013425.1	Genome
Infant	GCF_000014205.1	Genome
Infant	GCF_000014425.1	Genome
Infant	GCF_000014445.1	Genome
Infant	GCF_000016565.1	Genome
Infant	GCF_000016825.1	Genome
Infant	GCF_000017585.1	Genome
Infant	GCF_000020225.1	Genome
Infant	GCF_000022965.1	Genome
Infant	GCF_000024265.1	Genome
Infant	GCF_000024945.1	Genome
Infant	GCF_000025085.1	Genome
Infant	GCF_000025305.1	Genome
Infant	GCF_000025565.1	Genome
Infant	GCF_000026505.1	Genome
Infant	GCF_000027165.1	Genome
Infant	GCF_000027305.1	Genome
Infant	GCF_000056065.1	Genome
Infant	GCF_000069965.1	Genome
Infant	GCF_000072485.1	Genome
Infant	GCF_000157355.2	Genome
Infant	GCF_000158275.2	Genome
Infant	GCF_000159155.2	Genome
Infant	GCF_000164675.2	Genome
Infant	GCF_000165905.1	Genome
Infant	GCF_000174395.2	Genome
Infant	GCF_000178835.2	Genome
Infant	GCF_000189295.2	Genome
Infant	GCF_000190535.1	Genome
Infant	GCF_000190575.1	Genome
Infant	GCF_000193395.1	Genome
Infant	GCF_000195995.1	Genome
Infant	GCF_000203855.3	Genome
Infant	GCF_000204565.1	Genome
Infant	GCF_000212375.1	Genome
Infant	GCF_000213805.1	Genome
Infant	GCF_000213825.1	Genome
Infant	GCF_000224985.1	Genome
Infant	GCF_000240185.1	Genome
Infant	GCF_000253395.1	Genome
Infant	GCF_000299455.1	Genome
Infant	GCF_000317855.1	Genome
Infant	GCF_000332735.1	Genome
Infant	GCF_000463505.1	Genome
Infant	GCF_000590475.1	Genome
Infant	GCF_000724775.3	Genome
Infant	GCF_000785515.1	Genome
Infant	GCF_000807675.2	Genome
Infant	GCF_000829035.1	Genome
Infant	GCF_000833105.2	Genome
Infant	GCF_001025155.1	Genome
Infant	GCF_001025175.1	Genome
Infant	GCF_001028645.1	Genome
Infant	GCF_001042595.1	Genome
Infant	GCF_001190745.1	Genome
Infant	GCF_001308285.1	Genome
Infant	GCF_001314995.1	Genome
Infant	GCF_001318345.1	Genome
Infant	GCF_001456065.2	Genome
Infant	GCF_001594265.1	Genome
Infant	GCF_001698145.1	Genome
Infant	GCF_001729725.1	Genome
Infant	GCF_001753205.1	Genome
Infant	GCF_002000985.1	Genome
Infant	GCF_002024185.1	Genome
Infant	GCF_002222615.2	Genome
Infant	GCF_900116045.1	Genome
