# Supplementary material for: Probabilistic model based on circular statistics for quantifying coverage depth dynamics originating from DNA replication
Source: PeerJ. 2020 Mar 27;8:e8722. doi: 10.7717/peerj.8722 (PMC7104724; doi:10.7717/peerj.8722)
Supplement: Table S3 [file peerj-08-8722-s022.xlsx]

## Sheet: gtdb_complete_genome_file_seqid
Supplementary table 3: Chromosome sequences in complete genome sequence database
assembly_id	seq_id	checkm_completeness	genome_size	chromosome_size	gtdb_taxonomy	gtdb_species
GCA_000010565.1	AP009389.1	100	3025375	3025375	d__Bacteria;p__Firmicutes_B;c__Desulfotomaculia;o__Desulfotomaculales;f__Pelotomaculaceae;g__Pelotomaculum	s__Pelotomaculum thermopropionicum
GCA_000018565.1	CP000875.1	98.18	6785430	6346587	d__Bacteria;p__Chloroflexota;c__Chloroflexia;o__Chloroflexales;f__Herpetosiphonaceae;g__Herpetosiphon	s__Herpetosiphon aurantiacus
GCA_000024525.1	CP001769.1	100	8491258	8078757	d__Bacteria;p__Bacteroidota;c__Bacteroidia;o__Cytophagales;f__Spirosomaceae;g__Spirosoma	s__Spirosoma linguale
GCA_000091165.1	FP565575.1	96.26	2752854	2752854	d__Bacteria;p__Methylomirabilota;c__Methylomirabilia;o__Methylomirabilales;f__Methylomirabilaceae;g__Methylomirabilis	s__Methylomirabilis oxyfera_B
GCA_000147015.1	CP002161.1	57.83	208564	208564	d__Bacteria;p__Proteobacteria;c__Gammaproteobacteria;o__Enterobacterales;f__Enterobacteriaceae;g__Zinderia	s__Zinderia insecticola
GCA_000186885.1	CP002364.1	99.15	3851869	3851869	d__Bacteria;p__Desulfobacterota;c__Desulfobulbia;o__Desulfobulbales;f__Desulfobulbaceae;g__Desulfobulbus	s__Desulfobulbus propionicus
GCA_000214705.1	CP002770.1	100	3601386	3601386	d__Bacteria;p__Firmicutes_B;c__Desulfotomaculia;o__Desulfotomaculales;f__Desulfovirgulaceae;g__Desulfotomaculum_A	s__Desulfotomaculum_A kuznetsovii
GCA_000237975.1	CP003179.1	99	3557831	3472898	d__Bacteria;p__Firmicutes_E;c__Sulfobacillia;o__Sulfobacillales;f__Sulfobacillaceae;g__Sulfobacillus_A	s__Sulfobacillus_A acidophilus
GCA_000238975.1	CP002295.1	73.61	1762765	1762765	d__Bacteria;p__Proteobacteria;c__Gammaproteobacteria;o__Enterobacterales;f__Enterobacteriaceae;g__Serratia_D	s__Serratia_D symbiotica_A
GCA_000263195.1	CP002961.1	100	5220361	4798158	d__Bacteria;p__Bacteroidota;c__Bacteroidia;o__Cytophagales;f__Spirosomaceae;g__Emticicia	s__Emticicia oligotrophica
GCA_000281235.1	CP003731.1	66.39	756845	756845	d__Bacteria;p__Firmicutes;c__Bacilli;o__Mycoplasmatales;f__Mycoplasmoidaceae;g__Eperythrozoon_A	s__Eperythrozoon_A haemolamae
GCA_000307585.2	CP003184.1	99.52	2879349	2726530	d__Bacteria;p__Firmicutes_A;c__Thermoanaerobacteria;o__Thermoanaerobacterales;f__Thermoanaerobacteraceae;g__Thermoanaerobacterium	s__Thermoanaerobacterium saccharolyticum_B
GCA_000317655.1	CP003940.1	99.52	3163381	3163381	d__Bacteria;p__Cyanobacteria;c__Cyanobacteriia;o__Cyanobacteriales;f__Cyanobacteriaceae;g__Cyanobacterium	s__Cyanobacterium stanieri
GCA_000331975.1	CP003263.1	55.75	263431	263431	d__Bacteria;p__Bacteroidota;c__Bacteroidia;o__Flavobacteriales;f__Blattabacteriaceae;g__Uzinura	s__Uzinura diaspidicola
GCA_000348785.1	AP012057.1	99.15	4830181	4830181	d__Bacteria;p__Actinobacteriota;c__Acidimicrobiia;o__Microtrichales;f__Ilumatobacteraceae;g__Ilumatobacter	s__Ilumatobacter coccineus
GCA_000392435.1	CP005957.1	67.13	1013781	1013781	d__Bacteria;p__Patescibacteria;c__Saccharimonadia;o__Saccharimonadales;f__Saccharimonadaceae;g__Saccharimonas	s__Saccharimonas aalborgensis
GCA_000503835.1	CP006914.1	77.43	878109	878109	d__Bacteria;p__Patescibacteria;c__WWE3;o__UBA101185;f__UBA10185;g__UBA8498	s__UBA8498 sp000503835
GCA_000503875.1	CP006913.1	84.33	1177760	1177760	d__Bacteria;p__Patescibacteria;c__Gracilibacteria;o__Absconditabacterales;f__X112;g__UBA5124	s__UBA5124 sp000503875
GCA_000503915.1	CP006915.1	65.9	845464	845464	d__Bacteria;p__Patescibacteria;c__Saccharimonadia;o__Saccharimonadales;f__Saccharimonadaceae;g__RAAC3-TM7-1	s__RAAC3-TM7-1 sp000503915
GCA_000582535.1	CP006932.1	92.17	657101	657101	d__Bacteria;p__Firmicutes;c__Bacilli;o__Mycoplasmatales;f__Hepatoplasmataceae;g__Hepatoplasma	s__Hepatoplasma crinochetorum_B
GCA_000743035.1	CP008936.1	80.92	2175773	1722347	d__Bacteria;p__Proteobacteria;c__Alphaproteobacteria;o__Caedimonadales;f__Caedimonadaceae;g__Paracaedimonas	s__Paracaedimonas acanthamoebae
GCA_000808095.1	CP009910.1	100	982238	900694	d__Bacteria;p__Spirochaetota;c__Spirochaetia;o__Borreliales;f__Borreliaceae;g__Borreliella	s__Borreliella chilensis
GCA_000934545.1	CP010554.1	97.51	2934611	2934611	d__Bacteria;p__Proteobacteria;c__Gammaproteobacteria;o__Burkholderiales;f__Rhodocyclaceae;g__Rugosibacter	s__Rugosibacter aromaticivorans
GCA_000965765.1	CP011021.1	76.69	845307	845307	d__Bacteria;p__Firmicutes;c__Bacilli;o__Mycoplasmatales;f__Metamycoplasmataceae;g__Mycoplasmopsis_A	s__Mycoplasmopsis_A gallinaceum
GCA_001005265.1	CP011392.1	98.68	1725728	1725728	d__Bacteria;p__Chloroflexota;c__Dehalococcoidia;o__Dehalococcoidales;f__Dehalococcoidaceae;g__Dehalogenimonas	s__Dehalogenimonas sp001005265
GCA_001007975.1	CP011268.1	78.45	1044756	1044756	d__Bacteria;p__Patescibacteria;c__Gracilibacteria;o__Absconditabacterales;f__X112;g__Aalborg-AAW-1	s__Aalborg-AAW-1 sp001007975
GCA_001029635.1	CP011209.1	60.09	984447	984447	d__Bacteria;p__Patescibacteria;c__Paceibacteria;o__UBA6257;f__UBA9933;g__UBA9933	s__UBA9933 sp001029635
GCA_001029675.1	CP011210.1	66.5	1049888	1049888	d__Bacteria;p__Patescibacteria;c__Microgenomatia;o__UBA1400;f__CG1-02-47-37;g__GWC1-49-16	s__GWC1-49-16 sp001029675
GCA_001029695.1	CP011211.1	65.1	1038683	1038683	d__Bacteria;p__Patescibacteria;c__Saccharimonadia;o__Saccharimonadales;f__Saccharimonadaceae;g__2011-GWC2-44-17	s__2011-GWC2-44-17 sp001029695
GCA_001029715.1	CP011212.1	64.85	853053	853053	d__Bacteria;p__Patescibacteria;c__Microgenomatia;o__UBA1400;f__PJMF01;g__UBA1364	s__UBA1364 sp001029715
GCA_001029735.1	CP011213.1	69.8	915059	915059	d__Bacteria;p__Patescibacteria;c__UBA1384;o__UBA12157;f__UBA12157;g__GWE1-39-12	s__GWE1-39-12 sp001029735
GCA_001029755.1	CP011214.1	73.82	819458	819458	d__Bacteria;p__Patescibacteria;c__Microgenomatia;o__GWA2-44-7;f__UBA8517;g__GWF1-31-35	s__GWF1-31-35 sp001029755
GCA_001029775.1	CP011215.1	63.65	752630	752630	d__Bacteria;p__Patescibacteria;c__Paceibacteria;o__UBA9983_A;f__UBA12079;g__UBA12079	s__UBA12079 sp001029775
GCA_001029795.1	CP011216.1	73.43	602646	602646	d__Bacteria;p__Patescibacteria;c__Kazan-3B-28;o__Kazan-3B-28;f__Kazan-3B-28;g__Kazan-3B-28	s__Kazan-3B-28 sp001029795
GCA_001039275.2	CP030117.1	99.73	6443936	6443936	d__Bacteria;p__Firmicutes_I;c__Bacilli_A;o__Brevibacillales;f__Brevibacillaceae;g__Brevibacillus	s__Brevibacillus brevis_C
GCA_001263205.1	CP012333.1	96.13	12191466	12191466	d__Bacteria;p__Myxococcota;c__Polyangia;o__Polyangiales;f__Polyangiaceae;g__Labilithrix	s__Labilithrix luteola
GCA_001264245.1	CP011339.1	98.79	5686839	5686839	d__Bacteria;p__Cyanobacteria;c__Cyanobacteriia;o__Cyanobacteriales;f__Microcystaceae;g__Microcystis	s__Microcystis panniformis
GCA_001430885.1	CP013065.1	79.08	1247854	1247854	d__Bacteria;p__Patescibacteria;c__Gracilibacteria;o__Peribacterales;f__Peribacteraceae;g__Peribacter	s__Peribacter riflensis
GCA_001447315.1	CP013203.1	99.64	5884793	5508564	d__Bacteria;p__Firmicutes_I;c__Bacilli_A;o__Paenibacillales;f__Paenibacillaceae;g__Paenibacillus	s__Paenibacillus sp001447315
GCA_001447805.1	CP013099.1	99.63	3763866	3656958	d__Bacteria;p__Proteobacteria;c__Gammaproteobacteria;o__Tenderiales;f__Tenderiaceae;g__Tenderia	s__Tenderia electrophaga
GCA_001465115.1	CP013614.1	100	3928141	3928141	d__Bacteria;p__Firmicutes;c__Bacilli;o__Lactobacillales;f__Enterococcaceae;g__Enterococcus	s__Enterococcus silesiacus
GCA_001549895.1	AP014719.1	89.69	5026722	4698617	d__Bacteria;p__Actinobacteriota;c__Actinobacteria;o__Actinomycetales;f__Micrococcaceae;g__MA-N2	s__MA-N2 sp001549895
GCA_001602415.1	CP012155.1	98.41	3236529	3236529	d__Bacteria;p__Bacteroidota;c__Bacteroidia;o__NS11-12g;f__UKL13-3;g__UKL13-3	s__UKL13-3 sp001602415
GCA_001602435.1	CP012156.1	98.16	3501508	3501508	d__Bacteria;p__Proteobacteria;c__Alphaproteobacteria;o__Caulobacterales;f__Hyphomonadaceae;g__Aquidulcibacter	s__Aquidulcibacter sp001602435
GCA_001602455.1	CP012157.1	96.68	3387087	3387087	d__Bacteria;p__Proteobacteria;c__Gammaproteobacteria;o__Burkholderiales;f__UKL13-2;g__UKL13-2	s__UKL13-2 sp001602455
GCA_001610875.1	CP011272.1	98.75	6534136	6534136	d__Bacteria;p__Planctomycetota;c__Planctomycetes;o__Pirellulales;f__Pirellulaceae;g__Pirellula_B	s__Pirellula_B sp001610875
GCA_001697145.1	CP012719.1	100	2001352	2001352	d__Bacteria;p__Firmicutes;c__Bacilli;o__Lactobacillales;f__Streptococcaceae;g__Streptococcus	s__Streptococcus anginosus_C
GCA_001708385.1	CP012388.1	99.65	4142802	4142802	d__Bacteria;p__Bacteroidota;c__Bacteroidia;o__Flavobacteriales;f__Flavobacteriaceae;g__Flavobacterium	s__Flavobacterium psychrophilum_A
GCA_001765415.1	CP017245.1	88.89	1867336	1867336	d__Bacteria;p__Cyanobacteria;c__Vampirovibrionia;o__Gastranaerophilales;f__Gastranaerophilaceae;g__Zag1	s__Zag1 sp001765415
GCA_001931535.1	CP016211.1	94.84	16040666	16040666	d__Bacteria;p__Myxococcota;c__Polyangia;o__Polyangiales;f__Polyangiaceae;g__Minicystis	s__Minicystis rosea
GCA_001931755.2	CP015510.2	99.36	1801626	1801626	d__Bacteria;p__Proteobacteria;c__Alphaproteobacteria;o__Rickettsiales;f__Anaplasmataceae;g__Wolbachia	s__Wolbachia sp001931755
GCA_001999965.1	CP019646.1	97.73	3868357	3868357	d__Bacteria;p__Planctomycetota;c__Phycisphaerae;o__SG8-4;f__SM-Chi-D1;g__SM-Chi-D1	s__SM-Chi-D1 sp001999965
GCA_002005325.1	CP017315.1	96.96	1868279	1868279	d__Bacteria;p__Proteobacteria;c__Alphaproteobacteria;o__Rhizobiales;f__Rhizobiaceae;g__Tokpelaia	s__Tokpelaia hoelldoblerii
GCA_002007645.1	CP019791.1	97.73	4250973	4250973	d__Bacteria;p__Planctomycetota;c__Phycisphaerae;o__SG8-4;f__SG8-4;g__ST-NAGAB-D1	s__ST-NAGAB-D1 sp002007645
GCA_002074035.1	CP012849.1	89.89	534351	528700	d__Bacteria;p__Proteobacteria;c__Gammaproteobacteria;o__Enterobacterales;f__Enterobacteriaceae;g__Riesia_C	s__Riesia_C sp002074035
GCA_002162115.1	CP021417.1	99.56	2572413	2572413	d__Bacteria;p__Actinobacteriota;c__Actinobacteria;o__Mycobacteriales;f__Mycobacteriaceae;g__Corynebacterium	s__Corynebacterium ulcerans_A
GCA_002211745.1	CP022114.1	92.22	5006140	5006140	d__Bacteria;p__Proteobacteria;c__Gammaproteobacteria;o__Enterobacterales;f__Enterobacteriaceae;g__Kluyvera	s__Kluyvera georgiana_A
GCA_002215425.1	CP020122.1	98.08	629409	629409	d__Bacteria;p__Firmicutes;c__Bacilli;o__Mycoplasmatales;f__Mycoplasmoidaceae;g__Malacoplasma_A	s__Malacoplasma_A girerdii
GCA_002240395.1	CP016836.1	99.92	3865165	3865165	d__Bacteria;p__Proteobacteria;c__Gammaproteobacteria;o__Xanthomonadales;f__Xanthomonadaceae;g__Luteimonas	s__Luteimonas citri
GCA_002243285.1	CP022585.1	100	4551443	4551443	d__Bacteria;p__Bacteroidota;c__Bacteroidia;o__Flavobacteriales;f__Crocinitomicaceae;g__Fluviicola	s__Fluviicola riflensis
GCA_002243685.1	CP020754.1	96.23	6445173	5528419	d__Bacteria;p__Firmicutes;c__Bacilli;o__Bacillales;f__Bacillaceae_G;g__Bacillus_A	s__Bacillus_A thuringiensis
GCA_002291465.1	CP021238.1	96.21	4050523	4050523	d__Bacteria;p__Actinobacteriota;c__Actinobacteria;o__Mycobacteriales;f__Mycobacteriaceae;g__Mycobacterium	s__Mycobacterium lepraemurium
GCA_002310375.2	CP023315.2	99.57	4143958	4143958	d__Bacteria;p__Proteobacteria;c__Alphaproteobacteria;o__Caulobacterales;f__Caulobacteraceae;g__Caulobacter	s__Caulobacter vibrioides_D
GCA_002310495.1	CP023344.1	99.32	4730447	4730447	d__Bacteria;p__Verrucomicrobiota;c__Verrucomicrobiae;o__Opitutales;f__Opitutaceae;g__HZ-65	s__HZ-65 sp002310495
GCA_002355215.1	AP014612.1	99.91	2097874	2097874	d__Bacteria;p__Firmicutes;c__Bacilli;o__Lactobacillales;f__Streptococcaceae;g__Streptococcus	s__Streptococcus troglodytae
GCA_002355495.1	AP017424.1	99.64	8032664	8032664	d__Bacteria;p__Actinobacteriota;c__Actinobacteria;o__Streptomycetales;f__Streptomycetaceae;g__Streptomyces	s__Streptomyces laurentii
GCA_002355935.1	AP017895.1	93.52	2588680	2588680	d__Bacteria;p__Actinobacteriota;c__Actinobacteria;o__Actinomycetales;f__Micrococcaceae;g__Rothia	s__Rothia aeria
GCA_002356435.2	AP018040.2	100	3693233	3693233	d__Bacteria;p__Bacteroidota;c__Bacteroidia;o__Bacteroidales;f__Dysgonomonadaceae;g__Petrimonas	s__Petrimonas sp002356435
GCA_002370555.1	AP014718.1	87.74	3779248	3779248	d__Bacteria;p__Actinobacteriota;c__Actinobacteria;o__Actinomycetales;f__Micrococcaceae;g__Pseudarthrobacter_A	s__Pseudarthrobacter_A sp002370555
GCA_002688505.1	CP024013.1	77.08	271175	271175	d__Bacteria;p__Proteobacteria;c__Gammaproteobacteria;o__Enterobacterales;f__Enterobacteriaceae;g__Riesia_B	s__Riesia_B sp002688505
GCA_002813895.1	CP024912.1	99.56	3296945	3155247	d__Bacteria;p__Cyanobacteria;c__Cyanobacteriia;o__Cyanobacteriales;f__Cyanobacteriaceae;g__Cyanobacterium	s__Cyanobacterium sp002813895
GCA_002865505.1	CP025542.1	99.72	6610571	6610571	d__Bacteria;p__Proteobacteria;c__Gammaproteobacteria;o__Pseudomonadales;f__Pseudomonadaceae;g__Pseudomonas_E	s__Pseudomonas_E fluorescens_AK
GCA_002886105.1	CP025776.1	69.43	5145523	5145523	d__Bacteria;p__Proteobacteria;c__Gammaproteobacteria;o__Enterobacterales;f__Enterobacteriaceae;g__Kosakonia	s__Kosakonia sp002886105
GCA_002949675.1	CP026774.1	98.68	4578459	4395762	d__Bacteria;p__Proteobacteria;c__Gammaproteobacteria;o__Enterobacterales;f__Enterobacteriaceae;g__Escherichia	s__Escherichia dysenteriae
GCA_002950215.1	CP026788.1	99.7	4938295	4659463	d__Bacteria;p__Proteobacteria;c__Gammaproteobacteria;o__Enterobacterales;f__Enterobacteriaceae;g__Escherichia	s__Escherichia flexneri
GCA_002973635.1	CP027224.1	98.68	5508835	5508835	d__Bacteria;p__Firmicutes;c__Bacilli;o__Bacillales_A;f__Planococcaceae;g__Lysinibacillus	s__Lysinibacillus sp002973635
GCA_003072625.1	CP027805.1	99.46	2044184	2044184	d__Bacteria;p__Firmicutes;c__Bacilli;o__Lactobacillales;f__Lactobacillaceae;g__Lactobacillus_H	s__Lactobacillus_H reuteri_D
GCA_003096055.1	CP029161.1	98.77	637486	626137	d__Bacteria;p__Proteobacteria;c__Gammaproteobacteria;o__Enterobacterales;f__Enterobacteriaceae;g__Buchnera	s__Buchnera aphidicola_P
GCA_003129525.1	CP029329.1	99.19	4287191	4258077	d__Bacteria;p__Firmicutes_A;c__Clostridia;o__Clostridiales;f__Clostridiaceae;g__Clostridium	s__Clostridium beijerinckii_D
GCA_003260975.1	CP030041.1	100	6252144	6252144	d__Bacteria;p__Bacteroidota;c__Bacteroidia;o__Cytophagales;f__Cyclobacteriaceae;g__Echinicola	s__Echinicola strongylocentroti
GCA_003261055.1	CP030073.1	100	10239272	9269371	d__Bacteria;p__Actinobacteriota;c__Actinobacteria;o__Streptomycetales;f__Streptomycetaceae;g__Streptomyces	s__Streptomyces sp003261055
GCA_003261295.1	CP030086.1	93.48	1613813	1613813	d__Bacteria;p__Proteobacteria;c__Gammaproteobacteria;o__Burkholderiales;f__Burkholderiaceae;g__Polynucleobacter	s__Polynucleobacter sp003261295
GCA_003268595.1	CP029797.1	99.34	3728451	3728451	d__Bacteria;p__Firmicutes;c__Bacilli;o__Bacillales;f__Amphibacillaceae;g__X-1125	s__X-1125 sp003268595
GCA_003268615.1	CP029844.1	98.17	620771	617422	d__Bacteria;p__Bacteroidota;c__Bacteroidia;o__Flavobacteriales;f__Blattabacteriaceae;g__Blattabacterium	s__Blattabacterium clevelandi
GCA_003268635.1	CP029639.1	99.24	6667063	6667063	d__Bacteria;p__Firmicutes_I;c__Bacilli_A;o__Paenibacillales;f__Paenibacillaceae;g__Paenibacillus	s__Paenibacillus sp003268635
GCA_003268655.1	CP029642.1	99.77	4530754	4359122	d__Bacteria;p__Actinobacteriota;c__Actinobacteria;o__Actinomycetales;f__Micrococcaceae;g__Arthrobacter_A	s__Arthrobacter_A sp003268655
GCA_003268675.1	CP029378.1	99.49	7888441	7888441	d__Bacteria;p__Actinobacteriota;c__Actinobacteria;o__Streptomycetales;f__Streptomycetaceae;g__Streptomyces	s__Streptomyces bacillaris
GCA_003269425.1	CP030104.1	99.01	3772469	3772469	d__Bacteria;p__Bacteroidota;c__Bacteroidia;o__Flavobacteriales;f__Flavobacteriaceae;g__Flagellimonas	s__Flagellimonas sp003269425
GCA_003269465.1	CP030110.1	99.62	2683778	2683778	d__Bacteria;p__Firmicutes;c__Bacilli;o__Lactobacillales;f__Enterococcaceae;g__Enterococcus_B	s__Enterococcus_B faecium_B
GCA_003285105.1	CP030158.1	100	4807988	4807988	d__Bacteria;p__Bacteroidota;c__Rhodothermia;o__Rhodothermales;f__MEBICO9517;g__MEBICO9517	s__MEBICO9517 sp003285105
GCA_003285265.1	CP030239.1	91.83	3592357	3592357	d__Bacteria;p__Proteobacteria;c__Alphaproteobacteria;o__Rhodobacterales;f__Rhodobacteraceae;g__Paracoccus	s__Paracoccus mutanolyticus
GCA_003290225.1	CP029983.1	100	6243355	6243355	d__Bacteria;p__Proteobacteria;c__Gammaproteobacteria;o__Pseudomonadales;f__Pseudomonadaceae;g__Pseudomonas_E	s__Pseudomonas_E sp003290225
GCA_003290445.1	CP021781.1	99.15	2054094	2054094	d__Bacteria;p__Proteobacteria;c__Gammaproteobacteria;o__Francisellales;f__Francisellaceae;g__FDC440	s__FDC440 sp003290445
GCA_003293635.1	CP026548.1	100	2833887	2833887	d__Bacteria;p__Firmicutes_A;c__Clostridia;o__Oscillospirales;f__Ruminococcaceae;g__Faecalibacterium	s__Faecalibacterium prausnitzii_G
GCA_003293695.1	CP029556.1	99.07	2592821	2592821	d__Bacteria;p__Proteobacteria;c__Gammaproteobacteria;o__Xanthomonadales;f__Xanthomonadaceae;g__Lysobacter_B	s__Lysobacter_B sp003293695
GCA_003293715.1	CP030092.1	99.95	6328781	6328781	d__Bacteria;p__Proteobacteria;c__Gammaproteobacteria;o__Burkholderiales;f__Burkholderiaceae;g__Pseudoduganella	s__Pseudoduganella sp003293715
GCA_003296175.1	CP029208.1	99.18	4835764	3977827	d__Bacteria;p__Proteobacteria;c__Alphaproteobacteria;o__Rhizobiales;f__Rhizobiaceae;g__Nitratireductor	s__Nitratireductor sp003296175
GCA_003312465.1	CP030777.1	100	2970937	2970937	d__Bacteria;p__Firmicutes_A;c__Clostridia;o__Oscillospirales;f__Ruminococcaceae;g__Faecalibacterium	s__Faecalibacterium prausnitzii_K
GCA_003312875.1	CP015163.1	100	9121443	9121443	d__Bacteria;p__Actinobacteriota;c__Actinobacteria;o__Mycobacteriales;f__Pseudonocardiaceae;g__Amycolatopsis	s__Amycolatopsis albispora
GCA_003312915.1	CP030261.1	99.65	4839571	4839571	d__Bacteria;p__Bacteroidota;c__Bacteroidia;o__Flavobacteriales;f__Flavobacteriaceae;g__Flavobacterium	s__Flavobacterium sp003312915
GCA_900016775.1	LN890288.1	93.33	650317	650317	d__Bacteria;p__Proteobacteria;c__Gammaproteobacteria;o__Enterobacterales;f__Enterobacteriaceae;g__Serratia_C	s__Serratia_C symbiotica
GCA_900078365.1	LT598653.1	99.5	4139859	4139859	d__Bacteria;p__Proteobacteria;c__Alphaproteobacteria;o__Sphingomonadales;f__Sphingomonadaceae;g__Sphingopyxis	s__Sphingopyxis sp900078365
GCA_900157305.1	LS974202.1	99.84	2965660	2965660	d__Bacteria;p__Thermotogota;c__Thermotogae;o__Petrotogales;f__Kosmotogaceae;g__Mesotoga	s__Mesotoga infera_B
GCA_900324035.1	LS398110.1	99.59	8156021	8156021	d__Bacteria;p__Proteobacteria;c__Alphaproteobacteria;o__Rhizobiales;f__Xanthobacteraceae;g__Bradyrhizobium	s__Bradyrhizobium sp900324035
GCA_900465055.1	LS483250.1	100	4433651	4433651	d__Bacteria;p__Proteobacteria;c__Gammaproteobacteria;o__Enterobacterales;f__Psychromonadaceae;g__Moritella	s__Moritella yayanosii
GCA_900465355.1	LS483254.1	91.53	1324338	1324338	d__Bacteria;p__Bipolaricaulota;c__Bipolaricaulia;o__Bipolaricaulales;f__Bipolaricaulaceae;g__Bipolaricaulis	s__Bipolaricaulis anaerobius
GCF_000005825.2	NC_013791.2	98.68	4249248	3858997	d__Bacteria;p__Firmicutes;c__Bacilli;o__Bacillales;f__Bacillaceae_D;g__Bacillus_S	s__Bacillus_S pseudofirmus
GCF_000006685.1	NC_002620.2	99.19	1080451	1072950	d__Bacteria;p__Verrucomicrobiota_A;c__Chlamydiia;o__Chlamydiales;f__Chlamydiaceae;g__Chlamydia	s__Chlamydia muridarum
GCF_000006945.2	NC_003197.2	100	4951383	4857450	d__Bacteria;p__Proteobacteria;c__Gammaproteobacteria;o__Enterobacterales;f__Enterobacteriaceae;g__Salmonella	s__Salmonella enterica
GCF_000006965.1	NC_003047.1	99.28	6691694	3654135	d__Bacteria;p__Proteobacteria;c__Alphaproteobacteria;o__Rhizobiales;f__Rhizobiaceae;g__Sinorhizobium	s__Sinorhizobium meliloti_B
GCF_000006985.1	NC_002932.3	98.9	2154946	2154946	d__Bacteria;p__Bacteroidota;c__Chlorobia;o__Chlorobiales;f__Chlorobiaceae;g__Chlorobaculum	s__Chlorobaculum tepidum
GCF_000007025.1	NC_003103.1	99.46	1268755	1268755	d__Bacteria;p__Proteobacteria;c__Alphaproteobacteria;o__Rickettsiales;f__Rickettsiaceae;g__Rickettsia	s__Rickettsia conorii
GCF_000007085.1	NC_003869.1	99.04	2689445	2689445	d__Bacteria;p__Firmicutes_A;c__Thermoanaerobacteria;o__Thermoanaerobacterales;f__Thermoanaerobacteraceae;g__Caldanaerobacter	s__Caldanaerobacter subterraneus
GCF_000007145.1	NC_003902.1	99.64	5076188	5076188	d__Bacteria;p__Proteobacteria;c__Gammaproteobacteria;o__Xanthomonadales;f__Xanthomonadaceae;g__Xanthomonas	s__Xanthomonas campestris
GCF_000007205.1	NC_005043.1	99.49	1225935	1225935	d__Bacteria;p__Verrucomicrobiota_A;c__Chlamydiia;o__Chlamydiales;f__Chlamydiaceae;g__Chlamydophila	s__Chlamydophila pneumoniae
GCF_000007325.1	NC_003454.1	99.95	2174500	2174500	d__Bacteria;p__Fusobacteriota;c__Fusobacteriia;o__Fusobacteriales;f__Fusobacteriaceae;g__Fusobacterium	s__Fusobacterium nucleatum
GCF_000007365.1	NC_004061.1	98.77	641454	641454	d__Bacteria;p__Proteobacteria;c__Gammaproteobacteria;o__Enterobacterales;f__Enterobacteriaceae;g__Buchnera	s__Buchnera aphidicola_O
GCF_000007485.1	NC_004572.3	76.27	927303	927303	d__Bacteria;p__Actinobacteriota;c__Actinobacteria;o__Actinomycetales;f__Microbacteriaceae;g__Tropheryma	s__Tropheryma whipplei
GCF_000007605.1	NC_003361.3	99.49	1181356	1173390	d__Bacteria;p__Verrucomicrobiota_A;c__Chlamydiia;o__Chlamydiales;f__Chlamydiaceae;g__Chlamydophila	s__Chlamydophila caviae
GCF_000007665.1	NC_006087.1	98.63	2584158	2584158	d__Bacteria;p__Actinobacteriota;c__Actinobacteria;o__Actinomycetales;f__Microbacteriaceae;g__Leifsonia	s__Leifsonia xyli_C
GCF_000007705.1	NC_005085.1	99.04	4751080	4751080	d__Bacteria;p__Proteobacteria;c__Gammaproteobacteria;o__Burkholderiales;f__Chromobacteriaceae;g__Chromobacterium	s__Chromobacterium violaceum
GCF_000007725.1	NC_004545.1	97.18	618379	615980	d__Bacteria;p__Proteobacteria;c__Gammaproteobacteria;o__Enterobacterales;f__Enterobacteriaceae;g__Buchnera	s__Buchnera aphidicola_H
GCF_000007825.1	NC_004722.1	98.18	5427083	5411809	d__Bacteria;p__Firmicutes;c__Bacilli;o__Bacillales;f__Bacillaceae_G;g__Bacillus_A	s__Bacillus_A cereus
GCF_000007905.1	NC_004917.1	99.94	1799146	1799146	d__Bacteria;p__Campylobacterota;c__Campylobacteria;o__Campylobacterales;f__Helicobacteraceae;g__Helicobacter_C	s__Helicobacter_C hepaticus
GCF_000007925.1	NC_005042.1	100	1751080	1751080	d__Bacteria;p__Cyanobacteria;c__Cyanobacteriia;o__Synechococcales;f__Cyanobiaceae;g__Prochlorococcus	s__Prochlorococcus marinus
GCF_000007985.2	NC_002939.5	99.35	3814128	3814128	d__Bacteria;p__Desulfuromonadota;c__Desulfuromonadia;o__Geobacterales;f__Geobacteraceae;g__Geobacter	s__Geobacter sulfurreducens
GCF_000008025.1	NC_002978.6	99.79	1267782	1267782	d__Bacteria;p__Proteobacteria;c__Alphaproteobacteria;o__Rickettsiales;f__Anaplasmataceae;g__Wolbachia	s__Wolbachia sp000008025
GCF_000008045.1	NC_006142.1	99.66	1111496	1111496	d__Bacteria;p__Proteobacteria;c__Alphaproteobacteria;o__Rickettsiales;f__Rickettsiaceae;g__Rickettsia	s__Rickettsia typhi
GCF_000008185.1	NC_002967.9	100	2843201	2843201	d__Bacteria;p__Spirochaetota;c__Spirochaetia;o__Treponematales;f__Treponemataceae;g__Treponema_B	s__Treponema_B denticola
GCF_000008205.1	NC_007295.1	99.28	897405	897405	d__Bacteria;p__Firmicutes;c__Bacilli;o__Mycoplasmatales;f__Metamycoplasmataceae;g__Mesomycoplasma	s__Mesomycoplasma hyopneumoniae
GCF_000008305.1	NC_006055.1	100	793224	793224	d__Bacteria;p__Firmicutes;c__Bacilli;o__Mycoplasmatales;f__Mycoplasmataceae;g__Mesoplasma	s__Mesoplasma florum
GCF_000008365.1	NC_006908.1	99.75	777079	777079	d__Bacteria;p__Firmicutes;c__Bacilli;o__Mycoplasmatales;f__Metamycoplasmataceae;g__Mycoplasma_J	s__Mycoplasma_J mobile
GCF_000008385.1	NC_006833.1	99.15	1080084	1080084	d__Bacteria;p__Proteobacteria;c__Alphaproteobacteria;o__Rickettsiales;f__Anaplasmataceae;g__Wolbachia	s__Wolbachia sp000008385
GCF_000008465.1	NC_006512.1	100	2839318	2839318	d__Bacteria;p__Proteobacteria;c__Gammaproteobacteria;o__Enterobacterales;f__Alteromonadaceae;g__Idiomarina	s__Idiomarina loihiensis
GCF_000008485.1	NC_002942.5	100	3397754	3397754	d__Bacteria;p__Proteobacteria;c__Gammaproteobacteria;o__Legionellales;f__Legionellaceae;g__Legionella	s__Legionella pneumophila
GCF_000008545.1	NC_000853.1	100	1860725	1860725	d__Bacteria;p__Thermotogota;c__Thermotogae;o__Thermotogales;f__Thermotogaceae;g__Thermotoga	s__Thermotoga maritima
GCF_000008625.1	NC_000918.1	98.98	1590791	1551335	d__Bacteria;p__Aquificota;c__Aquificae;o__Aquificales;f__Aquificaceae;g__Aquifex	s__Aquifex aeolicus
GCF_000008685.2	NC_001318.1	100	1521208	910724	d__Bacteria;p__Spirochaetota;c__Spirochaetia;o__Borreliales;f__Borreliaceae;g__Borreliella	s__Borreliella burgdorferi
GCF_000008765.1	NC_003030.1	100	4132880	3940880	d__Bacteria;p__Firmicutes_A;c__Clostridia;o__Clostridiales;f__Clostridiaceae;g__Clostridium_S	s__Clostridium_S acetobutylicum
GCF_000008885.1	NC_004344.2	100	703004	697724	d__Bacteria;p__Proteobacteria;c__Gammaproteobacteria;o__Enterobacterales;f__Enterobacteriaceae;g__Wigglesworthia	s__Wigglesworthia glossinidia_A
GCF_000008985.1	NC_006570.2	99.62	1892775	1892775	d__Bacteria;p__Proteobacteria;c__Gammaproteobacteria;o__Francisellales;f__Francisellaceae;g__Francisella	s__Francisella tularensis
GCF_000009045.1	NC_000964.3	99.81	4215606	4215606	d__Bacteria;p__Firmicutes;c__Bacilli;o__Bacillales;f__Bacillaceae;g__Bacillus	s__Bacillus subtilis
GCF_000009105.1	NC_003116.1	99.51	2184406	2184406	d__Bacteria;p__Proteobacteria;c__Gammaproteobacteria;o__Burkholderiales;f__Neisseriaceae;g__Neisseria	s__Neisseria meningitidis_B
GCF_000009265.1	NC_008380.1	99.94	7751309	5057142	d__Bacteria;p__Proteobacteria;c__Alphaproteobacteria;o__Rhizobiales;f__Rhizobiaceae;g__Rhizobium	s__Rhizobium leguminosarum_L
GCF_000009305.1	NC_008229.1	99.12	1557588	1553927	d__Bacteria;p__Campylobacterota;c__Campylobacteria;o__Campylobacterales;f__Helicobacteraceae;g__Helicobacter	s__Helicobacter acinonychis
GCF_000009365.1	NC_008260.1	100	3120143	3120143	d__Bacteria;p__Proteobacteria;c__Gammaproteobacteria;o__Pseudomonadales;f__Alcanivoracaceae;g__Alcanivorax	s__Alcanivorax borkumensis
GCF_000009605.1	NC_002528.1	100	655725	640681	d__Bacteria;p__Proteobacteria;c__Gammaproteobacteria;o__Enterobacterales;f__Enterobacteriaceae;g__Buchnera	s__Buchnera aphidicola_I
GCF_000009625.1	NC_002678.2	99.92	7596297	7036071	d__Bacteria;p__Proteobacteria;c__Alphaproteobacteria;o__Rhizobiales;f__Rhizobiaceae;g__Mesorhizobium	s__Mesorhizobium japonicum
GCF_000009705.1	NC_003272.1	99.19	7211789	6413771	d__Bacteria;p__Cyanobacteria;c__Cyanobacteriia;o__Cyanobacteriales;f__Nostocaceae;g__Trichormus	s__Trichormus sp000009705
GCF_000009765.2	NC_003155.5	99.89	9119895	9025608	d__Bacteria;p__Actinobacteriota;c__Actinobacteria;o__Streptomycetales;f__Streptomycetaceae;g__Streptomyces	s__Streptomyces avermitilis
GCF_000009845.1	NC_005303.2	98.57	853092	853092	d__Bacteria;p__Firmicutes;c__Bacilli;o__Acholeplasmatales;f__Acholeplasmataceae;g__Phytoplasma	s__Phytoplasma sp000009845
GCF_000009905.1	NC_006177.1	98.02	3566135	3566135	d__Bacteria;p__Firmicutes_E;c__Symbiobacteriia;o__Symbiobacteriales;f__Symbiobacteriaceae;g__Symbiobacterium	s__Symbiobacterium thermophilum
GCF_000009945.1	NC_007899.1	99.49	1173791	1166239	d__Bacteria;p__Verrucomicrobiota_A;c__Chlamydiia;o__Chlamydiales;f__Chlamydiaceae;g__Chlamydophila	s__Chlamydophila felis
GCF_000009985.1	NC_007626.1	99	4967148	4967148	d__Bacteria;p__Proteobacteria;c__Alphaproteobacteria;o__Rhodospirillales_B;f__Magnetospirillaceae;g__Magnetospirillum_A	s__Magnetospirillum_A magneticum
GCF_000010065.1	NC_006576.1	99.73	2696255	2696255	d__Bacteria;p__Cyanobacteria;c__Cyanobacteriia;o__Synechococcales;f__Synechococcaceae;g__Synechococcus	s__Synechococcus elongatus
GCF_000010085.1	NC_007712.1	100	4292502	4171146	d__Bacteria;p__Proteobacteria;c__Gammaproteobacteria;o__Enterobacterales;f__Enterobacteriaceae;g__Sodalis	s__Sodalis glossinidius
GCF_000010125.1	NC_007350.1	99.44	2577899	2516575	d__Bacteria;p__Firmicutes;c__Bacilli;o__Staphylococcales;f__Staphylococcaceae;g__Staphylococcus	s__Staphylococcus saprophyticus
GCF_000010165.1	NC_012491.1	99.73	6296436	6296436	d__Bacteria;p__Firmicutes_I;c__Bacilli_A;o__Brevibacillales;f__Brevibacillaceae;g__Brevibacillus	s__Brevibacillus brevis_D
GCF_000010185.1	NC_010376.1	99.39	1986740	1797577	d__Bacteria;p__Firmicutes_A;c__Clostridia;o__Tissierellales;f__Helcococcaceae;g__Finegoldia	s__Finegoldia magna_H
GCF_000010285.1	NC_010617.1	98.68	2697540	2697540	d__Bacteria;p__Actinobacteriota;c__Actinobacteria;o__Actinomycetales;f__Micrococcaceae;g__Kocuria	s__Kocuria rhizophila_A
GCF_000010305.1	NC_012489.1	98.9	4636964	4636964	d__Bacteria;p__Gemmatimonadota;c__Gemmatimonadetes;o__Gemmatimonadales;f__Gemmatimonadaceae;g__Gemmatimonas	s__Gemmatimonas aurantiaca
GCF_000010325.1	NC_009662.1	98.78	1877931	1877931	d__Bacteria;p__Campylobacterota;c__Campylobacteria;o__Campylobacterales;f__Nitratiruptoraceae;g__Nitratiruptor	s__Nitratiruptor sp000010325
GCF_000010345.1	NC_009663.1	99.59	2562277	2562277	d__Bacteria;p__Campylobacterota;c__Campylobacteria;o__Campylobacterales;f__Sulfurovaceae;g__Sulfurovum	s__Sulfurovum sp000010345
GCF_000010405.1	NC_009465.1	93.54	1022154	1022154	d__Bacteria;p__Proteobacteria;c__Gammaproteobacteria;o__Thiomicrospirales;f__Thioglobaceae;g__Vesicomyosocius	s__Vesicomyosocius okutanii
GCF_000010425.1	NC_008618.1	100	2089645	2089645	d__Bacteria;p__Actinobacteriota;c__Actinobacteria;o__Actinomycetales;f__Bifidobacteriaceae;g__Bifidobacterium	s__Bifidobacterium adolescentis
GCF_000010505.1	NC_010729.1	99.92	2354886	2354886	d__Bacteria;p__Bacteroidota;c__Bacteroidia;o__Bacteroidales;f__Porphyromonadaceae;g__Porphyromonas	s__Porphyromonas gingivalis
GCF_000010525.1	NC_009937.1	100	5369772	5369772	d__Bacteria;p__Proteobacteria;c__Alphaproteobacteria;o__Rhizobiales;f__Xanthobacteraceae;g__Azorhizobium	s__Azorhizobium caulinodans
GCF_000010625.1	NC_010296.1	99.89	5842795	5842795	d__Bacteria;p__Cyanobacteria;c__Cyanobacteriia;o__Cyanobacteriales;f__Microcystaceae;g__Microcystis	s__Microcystis aeruginosa_B
GCF_000010645.1	NC_011565.1	89.51	1224919	1114206	d__Bacteria;p__Bacteroidota;c__Bacteroidia;o__Bacteroidales;f__Dysgonomonadaceae;g__Azobacteroides	s__Azobacteroides pseudotrichonymphae_B
GCF_000010665.1	NC_012796.1	100	5315620	5248049	d__Bacteria;p__Desulfobacterota_A;c__Desulfovibrionia;o__Desulfovibrionales;f__Desulfovibrionaceae;g__Desulfovibrio_F	s__Desulfovibrio_F magneticus
GCF_000010725.1	NC_013854.1	100	7599738	3311395	d__Bacteria;p__Proteobacteria;c__Alphaproteobacteria;o__Azospirillales;f__Azospirillaceae;g__Azospirillum	s__Azospirillum lipoferum_B
GCF_000010785.1	NC_013799.1	98.78	1743135	1743135	d__Bacteria;p__Aquificota;c__Aquificae;o__Aquificales;f__Aquificaceae;g__Hydrogenobacter	s__Hydrogenobacter thermophilus
GCF_000010805.1	NC_012522.1	99.69	8834939	7913450	d__Bacteria;p__Actinobacteriota;c__Actinobacteria;o__Mycobacteriales;f__Mycobacteriaceae;g__Rhodococcus	s__Rhodococcus opacus_C
GCF_000010985.1	NC_013939.1	96.55	2542933	2234389	d__Bacteria;p__Deferribacterota;c__Deferribacteres;o__Deferribacterales;f__Deferribacteraceae;g__Deferribacter	s__Deferribacter desulfuricans
GCF_000011065.1	NC_004663.1	99.41	6293399	6260361	d__Bacteria;p__Bacteroidota;c__Bacteroidia;o__Bacteroidales;f__Bacteroidaceae;g__Bacteroides	s__Bacteroides thetaiotaomicron
GCF_000011225.1	NC_004432.1	98.33	1358633	1358633	d__Bacteria;p__Firmicutes;c__Bacilli;o__Mycoplasmatales;f__Mycoplasmoidaceae;g__Malacoplasma	s__Malacoplasma penetrans
GCF_000011245.1	NC_004193.1	99.33	3630528	3630528	d__Bacteria;p__Firmicutes;c__Bacilli;o__Bacillales;f__Amphibacillaceae;g__Oceanobacillus	s__Oceanobacillus iheyensis
GCF_000011305.1	NC_004369.1	99.89	3219505	3147090	d__Bacteria;p__Actinobacteriota;c__Actinobacteria;o__Mycobacteriales;f__Mycobacteriaceae;g__Corynebacterium	s__Corynebacterium efficiens
GCF_000011325.1	NC_003450.3	99.52	3309401	3309401	d__Bacteria;p__Actinobacteriota;c__Actinobacteria;o__Mycobacteriales;f__Mycobacteriaceae;g__Corynebacterium	s__Corynebacterium glutamicum
GCF_000011345.1	NC_004113.1	99.76	2593857	2593857	d__Bacteria;p__Cyanobacteria;c__Cyanobacteriia;o__Thermosynechococcales;f__Thermosynechococcaceae;g__Thermosynechococcus	s__Thermosynechococcus elongatus
GCF_000011365.1	NC_004463.1	99.99	9105828	9105828	d__Bacteria;p__Proteobacteria;c__Alphaproteobacteria;o__Rhizobiales;f__Xanthobacteraceae;g__Bradyrhizobium	s__Bradyrhizobium diazoefficiens
GCF_000011385.1	NC_005125.1	99.15	4659019	4659019	d__Bacteria;p__Cyanobacteria;c__Cyanobacteriia;o__Gloeobacterales;f__Gloeobacteraceae;g__Gloeobacter	s__Gloeobacter violaceus
GCF_000011445.1	NC_005364.2	99.62	1211703	1211703	d__Bacteria;p__Firmicutes;c__Bacilli;o__Mycoplasmatales;f__Mycoplasmataceae;g__Mycoplasma	s__Mycoplasma mycoides
GCF_000011465.1	NC_005072.1	99.46	1657990	1657990	d__Bacteria;p__Cyanobacteria;c__Cyanobacteriia;o__Synechococcales;f__Cyanobiaceae;g__Prochlorococcus_A	s__Prochlorococcus_A marinus_S
GCF_000011485.1	NC_005071.1	99.46	2410873	2410873	d__Bacteria;p__Cyanobacteria;c__Cyanobacteriia;o__Synechococcales;f__Cyanobiaceae;g__Prochlorococcus_C	s__Prochlorococcus_C marinus_B
GCF_000011645.1	NC_006270.3	98.82	4222597	4222597	d__Bacteria;p__Firmicutes;c__Bacilli;o__Bacillales;f__Bacillaceae;g__Bacillus	s__Bacillus licheniformis
GCF_000011685.1	NC_006677.1	100	2922384	2702173	d__Bacteria;p__Proteobacteria;c__Alphaproteobacteria;o__Acetobacterales;f__Acetobacteraceae;g__Gluconobacter	s__Gluconobacter oxydans_C
GCF_000011745.1	NC_007292.1	98.78	791654	791654	d__Bacteria;p__Proteobacteria;c__Gammaproteobacteria;o__Enterobacterales;f__Enterobacteriaceae;g__Blochmannia	s__Blochmannia pennsylvanicus
GCF_000011905.1	NC_002936.3	99.01	1469720	1469720	d__Bacteria;p__Chloroflexota;c__Dehalococcoidia;o__Dehalococcoidales;f__Dehalococcoidaceae;g__Dehalococcoides	s__Dehalococcoides mccartyi
GCF_000011965.2	NC_003911.12	99.36	4601048	4109437	d__Bacteria;p__Proteobacteria;c__Alphaproteobacteria;o__Rhodobacterales;f__Rhodobacteraceae;g__Ruegeria_B	s__Ruegeria_B pomeroyi
GCF_000012085.2	NC_008710.1	99.19	1165365	917330	d__Bacteria;p__Spirochaetota;c__Spirochaetia;o__Borreliales;f__Borreliaceae;g__Borrelia	s__Borrelia turicatae
GCF_000012125.1	NC_007429.1	98.92	1051969	1044459	d__Bacteria;p__Verrucomicrobiota_A;c__Chlamydiia;o__Chlamydiales;f__Chlamydiaceae;g__Chlamydia	s__Chlamydia trachomatis
GCF_000012145.1	NC_007109.1	100	1587240	1485148	d__Bacteria;p__Proteobacteria;c__Alphaproteobacteria;o__Rickettsiales;f__Rickettsiaceae;g__Rickettsia	s__Rickettsia felis
GCF_000012225.1	NC_007716.1	97.14	723970	706569	d__Bacteria;p__Firmicutes;c__Bacilli;o__Acholeplasmatales;f__Acholeplasmataceae;g__Phytoplasma	s__Phytoplasma sp000012225
GCF_000012305.1	NC_007204.1	99.73	2650701	2650701	d__Bacteria;p__Proteobacteria;c__Gammaproteobacteria;o__Pseudomonadales;f__Moraxellaceae;g__Psychrobacter	s__Psychrobacter arcticus
GCF_000012325.1	NC_003910.7	100	5373180	5373180	d__Bacteria;p__Proteobacteria;c__Gammaproteobacteria;o__Enterobacterales;f__Alteromonadaceae;g__Colwellia	s__Colwellia psychrerythraea_A
GCF_000012345.1	NC_007205.1	100	1308759	1308759	d__Bacteria;p__Proteobacteria;c__Alphaproteobacteria;o__Pelagibacterales;f__Pelagibacteraceae;g__Pelagibacter	s__Pelagibacter ubique_R
GCF_000012385.1	NC_007940.1	100	1522076	1522076	d__Bacteria;p__Proteobacteria;c__Alphaproteobacteria;o__Rickettsiales;f__Rickettsiaceae;g__Rickettsia	s__Rickettsia bellii
GCF_000012425.1	NC_007298.1	99.61	4501104	4501104	d__Bacteria;p__Proteobacteria;c__Gammaproteobacteria;o__Burkholderiales;f__Rhodocyclaceae;g__Dechloromonas	s__Dechloromonas aromatica
GCF_000012465.1	NC_007335.2	99.45	1842899	1842899	d__Bacteria;p__Cyanobacteria;c__Cyanobacteriia;o__Synechococcales;f__Cyanobiaceae;g__Prochlorococcus_B	s__Prochlorococcus_B marinus_B
GCF_000012485.1	NC_007512.1	98.91	2364842	2364842	d__Bacteria;p__Bacteroidota;c__Chlorobia;o__Chlorobiales;f__Chlorobiaceae;g__Chlorobium	s__Chlorobium luteolum
GCF_000012505.1	NC_007513.1	99.46	2234828	2234828	d__Bacteria;p__Cyanobacteria;c__Cyanobacteriia;o__Synechococcales;f__Cyanobiaceae;g__Synechococcus_C	s__Synechococcus_C sp000012505
GCF_000012565.1	NC_007354.1	99.57	1315030	1315030	d__Bacteria;p__Proteobacteria;c__Alphaproteobacteria;o__Rickettsiales;f__Anaplasmataceae;g__Ehrlichia	s__Ehrlichia canis
GCF_000012585.1	NC_007514.1	98.9	2572079	2572079	d__Bacteria;p__Bacteroidota;c__Chlorobia;o__Chlorobiales;f__Chlorobiaceae;g__Chlorobium	s__Chlorobium chlorochromatii
GCF_000012605.1	NC_007520.2	99.39	2427734	2427734	d__Bacteria;p__Proteobacteria;c__Gammaproteobacteria;o__Thiomicrospirales;f__Thiomicrospiraceae;g__Hydrogenovibrio	s__Hydrogenovibrio crunogenus
GCF_000012625.1	NC_007516.1	99.73	2510659	2510659	d__Bacteria;p__Cyanobacteria;c__Cyanobacteriia;o__Synechococcales;f__Cyanobiaceae;g__Synechococcus_C	s__Synechococcus_C sp000012625
GCF_000012645.1	NC_007577.1	99.73	1709204	1709204	d__Bacteria;p__Cyanobacteria;c__Cyanobacteriia;o__Synechococcales;f__Cyanobiaceae;g__Prochlorococcus_A	s__Prochlorococcus_A marinus_L
GCF_000012725.1	NC_007406.1	99.8	3402093	3402093	d__Bacteria;p__Proteobacteria;c__Alphaproteobacteria;o__Rhizobiales;f__Xanthobacteraceae;g__Nitrobacter	s__Nitrobacter winogradskyi
GCF_000012745.1	NC_007404.1	100	2909809	2909809	d__Bacteria;p__Proteobacteria;c__Gammaproteobacteria;o__Burkholderiales;f__Hydrogenophilaceae;g__Thiobacillus	s__Thiobacillus denitrificans_B
GCF_000012765.1	NC_007633.1	99.62	1010023	1010023	d__Bacteria;p__Firmicutes;c__Bacilli;o__Mycoplasmatales;f__Mycoplasmataceae;g__Mycoplasma	s__Mycoplasma capricolum
GCF_000012805.1	NC_007484.1	97.35	3522111	3481691	d__Bacteria;p__Proteobacteria;c__Gammaproteobacteria;o__Nitrosococcales;f__Nitrosococcaceae;g__Nitrosococcus	s__Nitrosococcus oceani
GCF_000012825.1	NC_009614.1	99.25	5163189	5163189	d__Bacteria;p__Bacteroidota;c__Bacteroidia;o__Bacteroidales;f__Bacteroidaceae;g__Bacteroides_B	s__Bacteroides_B vulgatus
GCF_000012845.1	NC_009615.1	99.42	4811379	4811379	d__Bacteria;p__Bacteroidota;c__Bacteroidia;o__Bacteroidales;f__Tannerellaceae;g__Parabacteroides	s__Parabacteroides distasonis
GCF_000012865.1	NC_007503.1	100	2401520	2401520	d__Bacteria;p__Firmicutes_B;c__Desulfotomaculia;o__Carboxydothermales;f__Carboxydothermaceae;g__Carboxydothermus	s__Carboxydothermus hydrogenoformans
GCF_000012885.1	NC_007498.2	99.35	3665893	3665893	d__Bacteria;p__Desulfuromonadota;c__Desulfuromonadia;o__Desulfuromonadales;f__Pelobacteraceae_A;g__Pelobacter_A	s__Pelobacter_A carbinolicus
GCF_000012925.1	NC_007517.1	99.42	4011182	3997420	d__Bacteria;p__Desulfuromonadota;c__Desulfuromonadia;o__Geobacterales;f__Geobacteraceae;g__Geobacter	s__Geobacter metallireducens
GCF_000012965.1	NC_007575.1	99.59	2201561	2201561	d__Bacteria;p__Campylobacterota;c__Campylobacteria;o__Campylobacterales;f__Sulfurimonadaceae;g__Sulfurimonas	s__Sulfurimonas denitrificans
GCF_000012985.1	NC_007645.1	99.86	7215267	7215267	d__Bacteria;p__Proteobacteria;c__Gammaproteobacteria;o__Pseudomonadales;f__Oleiphilaceae;g__Hahella	s__Hahella chejuensis
GCF_000013005.1	NC_007722.1	99.59	3052398	3052398	d__Bacteria;p__Proteobacteria;c__Alphaproteobacteria;o__Sphingomonadales;f__Sphingomonadaceae;g__Erythrobacter_C	s__Erythrobacter_C litoralis
GCF_000013025.1	NC_008358.1	99.68	3705021	3705021	d__Bacteria;p__Proteobacteria;c__Alphaproteobacteria;o__Caulobacterales;f__Hyphomonadaceae;g__Hyphomonas	s__Hyphomonas neptunium
GCF_000013045.1	NC_007677.1	96.51	3587328	3551823	d__Bacteria;p__Bacteroidota;c__Rhodothermia;o__Rhodothermales;f__Salinibacteraceae;g__Salinibacter	s__Salinibacter ruber
GCF_000013085.1	NC_007643.1	99.5	4406557	4352825	d__Bacteria;p__Proteobacteria;c__Alphaproteobacteria;o__Rhodospirillales;f__Rhodospirillaceae;g__Rhodospirillum	s__Rhodospirillum rubrum
GCF_000013145.1	NC_007799.1	100	1176248	1176248	d__Bacteria;p__Proteobacteria;c__Alphaproteobacteria;o__Rickettsiales;f__Anaplasmataceae;g__Ehrlichia	s__Ehrlichia chaffeensis
GCF_000013165.1	NC_007798.1	99.28	859006	859006	d__Bacteria;p__Proteobacteria;c__Alphaproteobacteria;o__Rickettsiales;f__Anaplasmataceae;g__Neorickettsia	s__Neorickettsia sennetsu
GCF_000013185.1	NC_007984.1	100	686194	686194	d__Bacteria;p__Proteobacteria;c__Gammaproteobacteria;o__Enterobacterales;f__Enterobacteriaceae;g__Baumannia	s__Baumannia cicadellinicola_D
GCF_000013205.1	NC_007775.1	100	2932766	2932766	d__Bacteria;p__Cyanobacteria;c__Cyanobacteriia;o__PCC-7336;f__JA-3-3Ab;g__JA-3-3Ab	s__JA-3-3Ab sp000013205
GCF_000013225.1	NC_007776.1	100	3046682	3046682	d__Bacteria;p__Cyanobacteria;c__Cyanobacteriia;o__PCC-7336;f__JA-3-3Ab;g__JA-3-3Ab	s__JA-3-3Ab sp000013225
GCF_000013285.1	NC_008261.1	99.19	3256683	3256683	d__Bacteria;p__Firmicutes_A;c__Clostridia;o__Clostridiales;f__Clostridiaceae;g__Clostridium_P	s__Clostridium_P perfringens
GCF_000013325.1	NC_007794.1	99.82	4233314	3561584	d__Bacteria;p__Proteobacteria;c__Alphaproteobacteria;o__Sphingomonadales;f__Sphingomonadaceae;g__Novosphingobium	s__Novosphingobium aromaticivorans
GCF_000013345.1	NC_007777.1	99.59	5433628	5433628	d__Bacteria;p__Actinobacteriota;c__Actinobacteria;o__Frankiales;f__Frankiaceae;g__Frankia	s__Frankia casuarinae
GCF_000013365.1	NC_007778.1	99.89	5331656	5331656	d__Bacteria;p__Proteobacteria;c__Alphaproteobacteria;o__Rhizobiales;f__Xanthobacteraceae;g__Rhodopseudomonas	s__Rhodopseudomonas palustris_J
GCF_000013385.1	NC_007760.1	99.35	5013479	5013479	d__Bacteria;p__Myxococcota;c__Myxococcia;o__Myxococcales;f__Anaeromyxobacteraceae;g__Anaeromyxobacter	s__Anaeromyxobacter dehalogenans_B
GCF_000013405.1	NC_007759.1	96.43	3179300	3179300	d__Bacteria;p__Desulfobacterota;c__Syntrophia;o__Syntrophales;f__Syntrophaceae;g__Syntrophus	s__Syntrophus aciditrophicus
GCF_000013565.1	NC_007802.1	99.39	4404049	4317977	d__Bacteria;p__Proteobacteria;c__Alphaproteobacteria;o__Rhodobacterales;f__Rhodobacteraceae;g__EhC01	s__EhC01 sp000013565
GCF_000013605.1	NC_007908.1	99.8	4969784	4712337	d__Bacteria;p__Proteobacteria;c__Gammaproteobacteria;o__Burkholderiales;f__Burkholderiaceae;g__Rhodoferax	s__Rhodoferax ferrireducens
GCF_000013625.1	NC_009659.1	99.82	4110251	4110251	d__Bacteria;p__Proteobacteria;c__Gammaproteobacteria;o__Burkholderiales;f__Burkholderiaceae;g__Herminiimonas	s__Herminiimonas sp000013625
GCF_000013665.1	NC_007912.1	100	5057531	5057531	d__Bacteria;p__Proteobacteria;c__Gammaproteobacteria;o__Pseudomonadales;f__Cellvibrionaceae;g__Saccharophagus	s__Saccharophagus degradans
GCF_000013705.1	NC_007947.1	99.36	2971517	2971517	d__Bacteria;p__Proteobacteria;c__Gammaproteobacteria;o__Burkholderiales;f__Methylophilaceae;g__Methylobacillus	s__Methylobacillus flagellatus
GCF_000013745.1	NC_007925.1	99.31	5513844	5513844	d__Bacteria;p__Proteobacteria;c__Alphaproteobacteria;o__Rhizobiales;f__Xanthobacteraceae;g__Rhodopseudomonas	s__Rhodopseudomonas palustris_D
GCF_000013765.1	NC_007954.1	96.01	4545906	4545906	d__Bacteria;p__Proteobacteria;c__Gammaproteobacteria;o__Enterobacterales;f__Shewanellaceae;g__Shewanella	s__Shewanella denitrificans
GCF_000013865.1	NC_007948.1	99.61	5898676	5200264	d__Bacteria;p__Proteobacteria;c__Gammaproteobacteria;o__Burkholderiales;f__Burkholderiaceae;g__Polaromonas	s__Polaromonas sp000013865
GCF_000013885.1	NC_007964.1	99.89	5011522	4406967	d__Bacteria;p__Proteobacteria;c__Alphaproteobacteria;o__Rhizobiales;f__Xanthobacteraceae;g__Nitrobacter	s__Nitrobacter hamburgensis
GCF_000013905.1	NC_007969.1	100	3101097	3059876	d__Bacteria;p__Proteobacteria;c__Gammaproteobacteria;o__Pseudomonadales;f__Moraxellaceae;g__Psychrobacter	s__Psychrobacter cryohalolentis
GCF_000013985.1	NC_008048.1	99.98	3373713	3345170	d__Bacteria;p__Proteobacteria;c__Alphaproteobacteria;o__Sphingomonadales;f__Sphingomonadaceae;g__Sphingopyxis	s__Sphingopyxis alaskensis
GCF_000014005.1	NC_008009.1	99.95	5650368	5650368	d__Bacteria;p__Acidobacteriota;c__Acidobacteriae;o__Acidobacteriales;f__Koribacteraceae;g__Koribacter	s__Koribacter versatilis
GCF_000014045.1	NC_008209.1	99.25	4331234	4133097	d__Bacteria;p__Proteobacteria;c__Alphaproteobacteria;o__Rhodobacterales;f__Rhodobacteraceae;g__Roseobacter	s__Roseobacter denitrificans
GCF_000014065.1	NC_008044.1	99.82	4153699	3200938	d__Bacteria;p__Proteobacteria;c__Alphaproteobacteria;o__Rhodobacterales;f__Rhodobacteraceae;g__Tritonibacter	s__Tritonibacter sp000014065
GCF_000014125.1	NC_008593.1	100	2547720	2547720	d__Bacteria;p__Firmicutes_A;c__Clostridia;o__Clostridiales;f__Clostridiaceae;g__Clostridium_H	s__Clostridium_H novyi
GCF_000014145.1	NC_008255.1	100	4433218	4433218	d__Bacteria;p__Bacteroidota;c__Bacteroidia;o__Cytophagales;f__Cytophagaceae;g__Cytophaga	s__Cytophaga hutchinsonii
GCF_000014185.1	NC_008148.1	98.25	3225748	3225748	d__Bacteria;p__Actinobacteriota;c__Rubrobacteria;o__Rubrobacterales;f__Rubrobacteraceae;g__Rubrobacter_B	s__Rubrobacter_B xylanophilus
GCF_000014225.1	NC_008228.1	100	5187005	5187005	d__Bacteria;p__Proteobacteria;c__Gammaproteobacteria;o__Enterobacterales;f__Alteromonadaceae;g__Paraglaciecola	s__Paraglaciecola atlantica
GCF_000014245.1	NC_008254.1	99.18	4935185	4412446	d__Bacteria;p__Proteobacteria;c__Alphaproteobacteria;o__Rhizobiales;f__Rhizobiaceae;g__Chelativorans	s__Chelativorans sp000014245
GCF_000014265.1	NC_008312.1	99.71	7750108	7750108	d__Bacteria;p__Cyanobacteria;c__Cyanobacteriia;o__Cyanobacteriales;f__Phormidiaceae;g__Trichodesmium	s__Trichodesmium erythraeum
GCF_000014285.2	NC_008343.2	99.5	2708434	2708434	d__Bacteria;p__Proteobacteria;c__Alphaproteobacteria;o__Acetobacterales;f__Acetobacteraceae;g__Granulibacter	s__Granulibacter bethesdensis
GCF_000014345.1	NC_009879.1	99.53	1159772	1159772	d__Bacteria;p__Proteobacteria;c__Alphaproteobacteria;o__Rickettsiales;f__Rickettsiaceae;g__Rickettsia	s__Rickettsia canadensis
GCF_000014425.1	NC_008530.1	98.45	1894360	1894360	d__Bacteria;p__Firmicutes;c__Bacilli;o__Lactobacillales;f__Lactobacillaceae;g__Lactobacillus	s__Lactobacillus gasseri
GCF_000014445.1	NC_008531.1	100	2075763	2038396	d__Bacteria;p__Firmicutes;c__Bacilli;o__Lactobacillales;f__Lactobacillaceae;g__Leuconostoc	s__Leuconostoc mesenteroides
GCF_000014485.1	NC_008532.1	99.89	1864178	1856368	d__Bacteria;p__Firmicutes;c__Bacilli;o__Lactobacillales;f__Streptococcaceae;g__Streptococcus	s__Streptococcus thermophilus
GCF_000014565.1	NC_008268.1	99.94	9702737	7804765	d__Bacteria;p__Actinobacteriota;c__Actinobacteria;o__Mycobacteriales;f__Mycobacteriaceae;g__Rhodococcus	s__Rhodococcus jostii_A
GCF_000014585.1	NC_008319.1	99.73	2606748	2606748	d__Bacteria;p__Cyanobacteria;c__Cyanobacteriia;o__Synechococcales;f__Cyanobiaceae;g__Synechococcus_C	s__Synechococcus_C sp000014585
GCF_000014705.1	NC_008345.1	99.84	4845257	4845257	d__Bacteria;p__Proteobacteria;c__Gammaproteobacteria;o__Enterobacterales;f__Shewanellaceae;g__Shewanella	s__Shewanella frigidimarina
GCF_000014725.1	NC_008346.1	97.35	2936195	2936195	d__Bacteria;p__Firmicutes_B;c__Syntrophomonadia;o__Syntrophomonadales;f__Syntrophomonadaceae;g__Syntrophomonas	s__Syntrophomonas wolfei
GCF_000014745.1	NC_008347.1	99.51	3368780	3368780	d__Bacteria;p__Proteobacteria;c__Alphaproteobacteria;o__Caulobacterales;f__Maricaulaceae;g__Maricaulis	s__Maricaulis maris
GCF_000014785.1	NC_008340.1	100	3275944	3275944	d__Bacteria;p__Proteobacteria;c__Gammaproteobacteria;o__Nitrococcales;f__Halorhodospiraceae;g__Alkalilimnicola	s__Alkalilimnicola ehrlichii
GCF_000014805.1	NC_008570.1	99.97	4744448	4744448	d__Bacteria;p__Proteobacteria;c__Gammaproteobacteria;o__Enterobacterales;f__Aeromonadaceae;g__Aeromonas	s__Aeromonas hydrophila
GCF_000014825.1	NC_008435.1	99.66	5505494	5505494	d__Bacteria;p__Proteobacteria;c__Alphaproteobacteria;o__Rhizobiales;f__Xanthobacteraceae;g__Rhodopseudomonas	s__Rhodopseudomonas palustris_B
GCF_000014865.1	NC_008576.1	98.32	4719581	4719581	d__Bacteria;p__Proteobacteria;c__Magnetococcia;o__Magnetococcales;f__Magnetococcaceae;g__Magnetococcus	s__Magnetococcus marinus
GCF_000014885.1	NC_011566.1	99.84	5396476	5396476	d__Bacteria;p__Proteobacteria;c__Gammaproteobacteria;o__Enterobacterales;f__Shewanellaceae;g__Shewanella	s__Shewanella piezotolerans
GCF_000014905.1	NC_008536.1	100	9965640	9965640	d__Bacteria;p__Acidobacteriota;c__Acidobacteriae;o__Bryobacterales;f__Bryobacteraceae;g__Solibacter	s__Solibacter usitatus
GCF_000014925.1	NC_008711.1	99.71	5226648	4597686	d__Bacteria;p__Actinobacteriota;c__Actinobacteria;o__Actinomycetales;f__Micrococcaceae;g__Paenarthrobacter	s__Paenarthrobacter aurescens
GCF_000014965.1	NC_008554.1	99.84	4990251	4990251	d__Bacteria;p__Desulfobacterota;c__Syntrophobacteria;o__Syntrophobacterales;f__Syntrophobacteraceae;g__Syntrophobacter	s__Syntrophobacter fumaroxidans
GCF_000015025.1	NC_008578.1	98.75	2443540	2443540	d__Bacteria;p__Actinobacteriota;c__Actinobacteria;o__Acidothermales;f__Acidothermaceae;g__Acidothermus	s__Acidothermus cellulolyticus
GCF_000015045.1	NC_008609.1	97.17	4241119	4008000	d__Bacteria;p__Desulfuromonadota;c__Desulfuromonadia;o__Geobacterales;f__Pelobacteraceae;g__Pelobacter_C	s__Pelobacter_C propionicus
GCF_000015105.1	NC_008610.1	94.16	1160782	1160782	d__Bacteria;p__Proteobacteria;c__Gammaproteobacteria;o__Thiomicrospirales;f__Thioglobaceae;g__Ruthia	s__Ruthia magnifica
GCF_000015125.1	NC_008639.1	99.45	3133902	3133902	d__Bacteria;p__Bacteroidota;c__Chlorobia;o__Chlorobiales;f__Chlorobiaceae;g__Chlorobium	s__Chlorobium phaeobacteroides
GCF_000015165.1	NC_009485.1	99.69	8493513	8264687	d__Bacteria;p__Proteobacteria;c__Alphaproteobacteria;o__Rhizobiales;f__Xanthobacteraceae;g__Bradyrhizobium	s__Bradyrhizobium sp000015165
GCF_000015245.1	NC_008700.1	100	4306142	4306142	d__Bacteria;p__Proteobacteria;c__Gammaproteobacteria;o__Enterobacterales;f__Shewanellaceae;g__Shewanella	s__Shewanella amazonensis
GCF_000015285.1	NC_008709.1	100	4559598	4559598	d__Bacteria;p__Proteobacteria;c__Gammaproteobacteria;o__Enterobacterales;f__Psychromonadaceae;g__Psychromonas	s__Psychromonas ingrahamii
GCF_000015305.1	NC_008726.1	100	6491865	6491865	d__Bacteria;p__Actinobacteriota;c__Actinobacteria;o__Mycobacteriales;f__Mycobacteriaceae;g__Mycolicibacterium	s__Mycolicibacterium vanbaalenii
GCF_000015445.1	NC_008783.1	98.28	1445021	1445021	d__Bacteria;p__Proteobacteria;c__Alphaproteobacteria;o__Rhizobiales;f__Rhizobiaceae;g__Bartonella	s__Bartonella bacilliformis
GCF_000015505.1	NC_008781.1	99.38	5366143	4410291	d__Bacteria;p__Proteobacteria;c__Gammaproteobacteria;o__Burkholderiales;f__Burkholderiaceae;g__Polaromonas	s__Polaromonas naphthalenivorans
GCF_000015565.1	NC_008786.1	99.62	5597943	5566749	d__Bacteria;p__Proteobacteria;c__Gammaproteobacteria;o__Burkholderiales;f__Burkholderiaceae;g__Verminephrobacter	s__Verminephrobacter eiseniae
GCF_000015585.1	NC_008789.1	98.91	2678452	2678452	d__Bacteria;p__Proteobacteria;c__Gammaproteobacteria;o__Nitrococcales;f__Halorhodospiraceae;g__Halorhodospira	s__Halorhodospira halophila
GCF_000015645.1	NC_008816.1	99.64	1669886	1669886	d__Bacteria;p__Cyanobacteria;c__Cyanobacteriia;o__Synechococcales;f__Cyanobiaceae;g__Prochlorococcus_A	s__Prochlorococcus_A marinus_O
GCF_000015665.1	NC_008817.1	100	1704176	1704176	d__Bacteria;p__Cyanobacteria;c__Cyanobacteriia;o__Synechococcales;f__Cyanobiaceae;g__Prochlorococcus_A	s__Prochlorococcus_A marinus_P
GCF_000015725.1	NC_008825.1	99.53	4643639	4044195	d__Bacteria;p__Proteobacteria;c__Gammaproteobacteria;o__Burkholderiales;f__Burkholderiaceae;g__Methylibium	s__Methylibium petroleiphilum
GCF_000015865.1	NC_009012.1	99.33	3843301	3843301	d__Bacteria;p__Firmicutes_A;c__Clostridia;o__Acetivibrionales;f__Acetivibrionaceae;g__Ruminiclostridium	s__Ruminiclostridium thermocellum
GCF_000015965.1	NC_009091.1	99.46	1641879	1641879	d__Bacteria;p__Cyanobacteria;c__Cyanobacteriia;o__Synechococcales;f__Cyanobiaceae;g__Prochlorococcus_A	s__Prochlorococcus_A marinus_E
GCF_000016065.1	NC_009092.1	99.7	4602594	4602594	d__Bacteria;p__Proteobacteria;c__Gammaproteobacteria;o__Enterobacterales;f__Shewanellaceae;g__Shewanella	s__Shewanella loihica
GCF_000016085.1	NC_009337.1	98.36	1966858	1966858	d__Bacteria;p__Bacteroidota;c__Chlorobia;o__Chlorobiales;f__Chlorobiaceae;g__Chlorobium	s__Chlorobium phaeovibrioides
GCF_000016165.1	NC_009253.1	100	3608104	3608104	d__Bacteria;p__Firmicutes_B;c__Desulfotomaculia;o__Desulfotomaculales;f__Desulfotomaculaceae;g__Desulfotomaculum_H	s__Desulfotomaculum_H reducens
GCF_000016185.1	NC_011420.2	99.56	4355543	4355543	d__Bacteria;p__Proteobacteria;c__Alphaproteobacteria;o__Azospirillales;f__Azospirillaceae;g__Rhodospirillum_A	s__Rhodospirillum_A centenum
GCF_000016325.1	NC_009436.1	99.7	4676461	4518712	d__Bacteria;p__Proteobacteria;c__Gammaproteobacteria;o__Enterobacterales;f__Enterobacteriaceae;g__Lelliottia	s__Lelliottia sp000016325
GCF_000016345.1	NC_009379.1	99.87	2159490	2159490	d__Bacteria;p__Proteobacteria;c__Gammaproteobacteria;o__Burkholderiales;f__Burkholderiaceae;g__Polynucleobacter	s__Polynucleobacter asymbioticus
GCF_000016425.1	NC_009380.1	99.49	5183331	5183331	d__Bacteria;p__Actinobacteriota;c__Actinobacteria;o__Mycobacteriales;f__Micromonosporaceae;g__Micromonospora	s__Micromonospora tropica
GCF_000016505.1	NC_009706.1	99.31	4023800	3964618	d__Bacteria;p__Firmicutes_A;c__Clostridia;o__Clostridiales;f__Clostridiaceae;g__Clostridium_B	s__Clostridium_B kluyveri
GCF_000016545.1	NC_009437.1	99.5	2970275	2970275	d__Bacteria;p__Firmicutes_A;c__Thermoanaerobacteria;o__Caldicellulosiruptorales;f__Caldicellulosiruptoraceae;g__Caldicellulosiruptor	s__Caldicellulosiruptor saccharolyticus
GCF_000016565.1	NC_009439.1	99.94	5072807	5072807	d__Bacteria;p__Proteobacteria;c__Gammaproteobacteria;o__Pseudomonadales;f__Pseudomonadaceae;g__Pseudomonas_E	s__Pseudomonas_E mendocina_A
GCF_000016645.1	NC_009441.1	99.65	6096872	6096872	d__Bacteria;p__Bacteroidota;c__Bacteroidia;o__Flavobacteriales;f__Flavobacteriaceae;g__Flavobacterium	s__Flavobacterium johnsoniae
GCF_000016665.1	NC_009523.1	99.69	5801598	5801598	d__Bacteria;p__Chloroflexota;c__Chloroflexia;o__Chloroflexales;f__Roseiflexaceae;g__Roseiflexus	s__Roseiflexus sp000016665
GCF_000016745.1	NC_009483.1	97.66	5136364	5136364	d__Bacteria;p__Desulfuromonadota;c__Desulfuromonadia;o__Geobacterales;f__Geobacteraceae;g__Geobacter_B	s__Geobacter_B uraniireducens
GCF_000016765.1	NC_009511.1	99.1	5915246	5382261	d__Bacteria;p__Proteobacteria;c__Alphaproteobacteria;o__Sphingomonadales;f__Sphingomonadaceae;g__Rhizorhabdus	s__Rhizorhabdus wittichii
GCF_000016785.1	NC_009486.1	100	1823511	1823511	d__Bacteria;p__Thermotogota;c__Thermotogae;o__Thermotogales;f__Thermotogaceae;g__Thermotoga	s__Thermotoga petrophila
GCF_000016825.1	NC_009513.1	98.9	1999618	1999618	d__Bacteria;p__Firmicutes;c__Bacilli;o__Lactobacillales;f__Lactobacillaceae;g__Lactobacillus_H	s__Lactobacillus_H reuteri
GCF_000016885.1	NC_009524.1	99.93	2995049	2978976	d__Bacteria;p__Proteobacteria;c__Gammaproteobacteria;o__Pseudomonadales;f__Moraxellaceae;g__Psychrobacter	s__Psychrobacter sp000016885
GCF_000016905.1	NC_009616.1	98.28	1915238	1915238	d__Bacteria;p__Thermotogota;c__Thermotogae;o__Thermotogales;f__Fervidobacteriaceae;g__Thermosipho	s__Thermosipho melanesiensis
GCF_000016985.1	NC_009633.1	99.29	4929566	4929566	d__Bacteria;p__Firmicutes_A;c__Clostridia;o__Peptostreptococcales;f__Natronincolaceae;g__Alkaliphilus_A	s__Alkaliphilus_A metalliredigens
GCF_000017145.1	NC_009636.1	99.16	6817576	3781904	d__Bacteria;p__Proteobacteria;c__Alphaproteobacteria;o__Rhizobiales;f__Rhizobiaceae;g__Sinorhizobium	s__Sinorhizobium medicae
GCF_000017205.1	NC_009656.1	100	6588339	6588339	d__Bacteria;p__Proteobacteria;c__Gammaproteobacteria;o__Pseudomonadales;f__Pseudomonadaceae;g__Pseudomonas	s__Pseudomonas aeruginosa_A
GCF_000017245.1	NC_009655.1	100	2319663	2319663	d__Bacteria;p__Proteobacteria;c__Gammaproteobacteria;o__Enterobacterales;f__Pasteurellaceae;g__Basfia	s__Basfia succinogenes
GCF_000017265.1	NC_011144.1	100	4379231	3996255	d__Bacteria;p__Proteobacteria;c__Alphaproteobacteria;o__Caulobacterales;f__Caulobacteraceae;g__Phenylobacterium	s__Phenylobacterium zucineum_A
GCF_000017285.1	NC_009654.1	100	5100344	5100344	d__Bacteria;p__Proteobacteria;c__Gammaproteobacteria;o__Pseudomonadales;f__Marinomonadaceae;g__Marinomonas	s__Marinomonas sp000017285
GCF_000017305.1	NC_009664.2	99.19	4956672	4761183	d__Bacteria;p__Actinobacteriota;c__Actinobacteria;o__Actinomycetales;f__Kineococcaceae;g__Kineococcus	s__Kineococcus radiotolerans
GCF_000017425.1	NC_009674.1	98.85	4094159	4087024	d__Bacteria;p__Firmicutes;c__Bacilli;o__Bacillales;f__Bacillaceae_G;g__Bacillus_A	s__Bacillus_A cytotoxicus
GCF_000017505.1	NC_009675.1	99.35	5277990	5277990	d__Bacteria;p__Myxococcota;c__Myxococcia;o__Myxococcales;f__Anaeromyxobacteraceae;g__Anaeromyxobacter	s__Anaeromyxobacter sp000017505
GCF_000017545.1	NC_009718.1	98.25	1948941	1948941	d__Bacteria;p__Thermotogota;c__Thermotogae;o__Thermotogales;f__Fervidobacteriaceae;g__Fervidobacterium	s__Fervidobacterium nodosum
GCF_000017565.1	NC_009719.1	100	3914745	3914745	d__Bacteria;p__Proteobacteria;c__Alphaproteobacteria;o__Parvibaculales;f__Parvibaculaceae;g__Parvibaculum	s__Parvibaculum lavamentivorans
GCF_000017585.1	NC_009714.1	99.88	1714951	1711273	d__Bacteria;p__Campylobacterota;c__Campylobacteria;o__Campylobacterales;f__Campylobacteraceae;g__Campylobacter_B	s__Campylobacter_B hominis
GCF_000017645.1	NC_009720.1	100	5625098	5308934	d__Bacteria;p__Proteobacteria;c__Alphaproteobacteria;o__Rhizobiales;f__Xanthobacteraceae;g__Xanthobacter	s__Xanthobacter autotrophicus
GCF_000017805.1	NC_009767.1	99.69	5723298	5723298	d__Bacteria;p__Chloroflexota;c__Chloroflexia;o__Chloroflexales;f__Roseiflexaceae;g__Roseiflexus	s__Roseiflexus castenholzii
GCF_000017845.1	NC_010546.1	99.96	5460377	4934271	d__Bacteria;p__Cyanobacteria;c__Cyanobacteriia;o__Cyanobacteriales;f__Microcystaceae;g__Crocosphaera	s__Crocosphaera sp000017845
GCF_000017865.1	NC_009828.1	100	2135342	2135342	d__Bacteria;p__Thermotogota;c__Thermotogae;o__Thermotogales;f__Thermotogaceae;g__Pseudothermotoga_B	s__Pseudothermotoga_B lettingae
GCF_000018005.1	NC_009921.1	100	8982042	8982042	d__Bacteria;p__Actinobacteriota;c__Actinobacteria;o__Frankiales;f__Frankiaceae;g__Frankia	s__Frankia sp000018005
GCF_000018025.1	NC_009831.1	99.84	5517674	5517674	d__Bacteria;p__Proteobacteria;c__Gammaproteobacteria;o__Enterobacterales;f__Shewanellaceae;g__Shewanella	s__Shewanella sediminis
GCF_000018085.1	NC_009832.1	100	5495657	5448853	d__Bacteria;p__Proteobacteria;c__Gammaproteobacteria;o__Enterobacterales;f__Enterobacteriaceae;g__Serratia	s__Serratia proteamaculans_C
GCF_000018105.1	NC_009925.1	99.53	8361599	6503724	d__Bacteria;p__Cyanobacteria;c__Cyanobacteriia;o__Thermosynechococcales;f__Thermosynechococcaceae;g__Acaryochloris	s__Acaryochloris marina
GCF_000018145.1	NC_009952.1	99.09	4417868	3789584	d__Bacteria;p__Proteobacteria;c__Alphaproteobacteria;o__Rhodobacterales;f__Rhodobacteraceae;g__Dinoroseobacter	s__Dinoroseobacter shibae
GCF_000018205.1	NC_009881.1	100	1231060	1231060	d__Bacteria;p__Proteobacteria;c__Alphaproteobacteria;o__Rickettsiales;f__Rickettsiaceae;g__Rickettsia	s__Rickettsia akari
GCF_000018265.1	NC_009953.1	99.39	5786361	5786361	d__Bacteria;p__Actinobacteriota;c__Actinobacteria;o__Mycobacteriales;f__Micromonosporaceae;g__Micromonospora	s__Micromonospora arenicola
GCF_000018285.1	NC_009901.1	99.68	5174581	5174581	d__Bacteria;p__Proteobacteria;c__Gammaproteobacteria;o__Enterobacterales;f__Shewanellaceae;g__Shewanella	s__Shewanella pealeana
GCF_000018325.1	NC_009922.1	98.58	3123558	3123558	d__Bacteria;p__Firmicutes_A;c__Clostridia;o__Peptostreptococcales;f__Natronincolaceae;g__Alkaliphilus_B	s__Alkaliphilus_B oremlandii
GCF_000018405.1	NC_009943.1	99.35	3944167	3944167	d__Bacteria;p__Desulfobacterota;c__Desulfobacteria;o__Desulfobacterales;f__Desulfococcaceae_A;g__Desulfococcus_A	s__Desulfococcus_A oleovorans
GCF_000018425.1	NC_010424.1	98.09	2349476	2349476	d__Bacteria;p__Firmicutes_B;c__Desulfotomaculia;o__Ammonifexales;f__Desulforudaceae;g__Desulforudis	s__Desulforudis audaxviator
GCF_000018545.1	NC_012587.1	100	6891900	3925702	d__Bacteria;p__Proteobacteria;c__Alphaproteobacteria;o__Rhizobiales;f__Rhizobiaceae;g__Sinorhizobium	s__Sinorhizobium fredii_A
GCF_000018605.1	NC_010003.1	96.55	2169548	2169548	d__Bacteria;p__Thermotogota;c__Thermotogae;o__Petrotogales;f__Petrotogaceae;g__Petrotoga	s__Petrotoga mobilis
GCF_000018625.1	NC_010067.1	99.85	4600800	4600800	d__Bacteria;p__Proteobacteria;c__Gammaproteobacteria;o__Enterobacterales;f__Enterobacteriaceae;g__Salmonella	s__Salmonella enterica_E
GCF_000018685.1	NC_010001.1	99.11	4847594	4847594	d__Bacteria;p__Firmicutes_A;c__Clostridia;o__Lachnospirales;f__Lachnospiraceae;g__Lachnoclostridium	s__Lachnoclostridium phytofermentans
GCF_000018785.1	NC_010163.1	98.65	1496992	1496992	d__Bacteria;p__Firmicutes;c__Bacilli;o__Acholeplasmatales;f__Acholeplasmataceae;g__Acholeplasma	s__Acholeplasma laidlawii
GCF_000018865.1	NC_010175.1	99.69	5258541	5258541	d__Bacteria;p__Chloroflexota;c__Chloroflexia;o__Chloroflexales;f__Chloroflexaceae;g__Chloroflexus	s__Chloroflexus aurantiacus
GCF_000018885.1	NC_010168.1	99.02	3155250	3155250	d__Bacteria;p__Actinobacteriota;c__Actinobacteria;o__Actinomycetales;f__Micrococcaceae;g__Renibacterium	s__Renibacterium salmoninarum
GCF_000018945.1	NC_011978.1	100	1884562	1884562	d__Bacteria;p__Thermotogota;c__Thermotogae;o__Thermotogales;f__Thermotogaceae;g__Thermotoga	s__Thermotoga neapolitana
GCF_000019085.1	NC_010321.1	99.52	2362816	2362816	d__Bacteria;p__Firmicutes_A;c__Thermoanaerobacteria;o__Thermoanaerobacterales;f__Thermoanaerobacteraceae;g__Thermoanaerobacter	s__Thermoanaerobacter pseudethanolicus
GCF_000019125.1	NC_010322.1	99.6	6078430	6078430	d__Bacteria;p__Proteobacteria;c__Gammaproteobacteria;o__Pseudomonadales;f__Pseudomonadaceae;g__Pseudomonas_E	s__Pseudomonas_E putida_P
GCF_000019145.1	NC_010338.1	100	5889399	5477872	d__Bacteria;p__Proteobacteria;c__Alphaproteobacteria;o__Caulobacterales;f__Caulobacteraceae;g__Caulobacter	s__Caulobacter sp000019145
GCF_000019165.1	NC_010337.2	100	3075407	3075407	d__Bacteria;p__Firmicutes_B;c__Desulfitobacteriia;o__Heliobacteriales;f__Heliobacteriaceae;g__Heliobacterium	s__Heliobacterium modesticaldum
GCF_000019185.1	NC_010334.1	99.84	5226917	5226917	d__Bacteria;p__Proteobacteria;c__Gammaproteobacteria;o__Enterobacterales;f__Shewanellaceae;g__Shewanella	s__Shewanella halifaxensis
GCF_000019225.1	NC_010995.1	100	4576573	4576573	d__Bacteria;p__Proteobacteria;c__Gammaproteobacteria;o__Pseudomonadales;f__Cellvibrionaceae;g__Cellvibrio	s__Cellvibrio japonicus
GCF_000019345.1	NC_010503.1	99.05	751679	751679	d__Bacteria;p__Firmicutes;c__Bacilli;o__Mycoplasmatales;f__Mycoplasmoidaceae;g__Ureaplasma	s__Ureaplasma parvum
GCF_000019365.1	NC_010511.1	99.69	7737025	7659055	d__Bacteria;p__Proteobacteria;c__Alphaproteobacteria;o__Rhizobiales;f__Beijerinckiaceae;g__Methylobacterium	s__Methylobacterium sp000019365
GCF_000019405.1	NC_010519.1	99.84	2263857	2263857	d__Bacteria;p__Proteobacteria;c__Gammaproteobacteria;o__Enterobacterales;f__Pasteurellaceae;g__Histophilus	s__Histophilus somni
GCF_000019445.1	NC_010501.1	99.59	5774330	5774330	d__Bacteria;p__Proteobacteria;c__Gammaproteobacteria;o__Pseudomonadales;f__Pseudomonadaceae;g__Pseudomonas_E	s__Pseudomonas_E putida_E
GCF_000019525.1	NC_010506.1	99.84	5935403	5935403	d__Bacteria;p__Proteobacteria;c__Gammaproteobacteria;o__Enterobacterales;f__Shewanellaceae;g__Shewanella	s__Shewanella woodyi
GCF_000019665.1	NC_010794.1	98.65	2287145	2287145	d__Bacteria;p__Verrucomicrobiota;c__Verrucomicrobiae;o__Methylacidiphilales;f__Methylacidiphilaceae;g__Methylacidiphilum	s__Methylacidiphilum infernorum
GCF_000019685.1	NC_011229.1	100	1574881	931674	d__Bacteria;p__Spirochaetota;c__Spirochaetia;o__Borreliales;f__Borreliaceae;g__Borrelia	s__Borrelia duttonii
GCF_000019745.1	NC_010531.1	92.78	1560469	1560469	d__Bacteria;p__Proteobacteria;c__Gammaproteobacteria;o__Burkholderiales;f__Burkholderiaceae;g__Polynucleobacter	s__Polynucleobacter necessarius
GCF_000019785.1	NC_010524.1	100	4909403	4909403	d__Bacteria;p__Proteobacteria;c__Gammaproteobacteria;o__Burkholderiales;f__Burkholderiaceae;g__Leptothrix	s__Leptothrix cholodnii
GCF_000019845.1	NC_010581.1	99.55	4418616	4170153	d__Bacteria;p__Proteobacteria;c__Alphaproteobacteria;o__Rhizobiales;f__Beijerinckiaceae;g__Beijerinckia	s__Beijerinckia indica
GCF_000019905.1	NC_010556.1	100	3040786	3034136	d__Bacteria;p__Firmicutes;c__Bacilli;o__Exiguobacterales;f__Exiguobacteraceae;g__Exiguobacterium_A	s__Exiguobacterium_A sibiricum
GCF_000019945.1	NC_010725.1	99.69	5848997	5800441	d__Bacteria;p__Proteobacteria;c__Alphaproteobacteria;o__Rhizobiales;f__Beijerinckiaceae;g__Methylobacterium	s__Methylobacterium populi
GCF_000019965.1	NC_010571.1	99.32	5957605	5957605	d__Bacteria;p__Verrucomicrobiota;c__Verrucomicrobiae;o__Opitutales;f__Opitutaceae;g__Opitutus	s__Opitutus terrae
GCF_000020005.1	NC_010718.1	98.31	3191453	3165557	d__Bacteria;p__Firmicutes_D;c__Natranaerobiia;o__Natranaerobiales;f__Natranaerobiaceae;g__Natranaerobius	s__Natranaerobius thermophilus
GCF_000020025.1	NC_010628.1	99.56	9059191	8234322	d__Bacteria;p__Cyanobacteria;c__Cyanobacteriia;o__Cyanobacteriales;f__Nostocaceae;g__Nostoc	s__Nostoc punctiforme
GCF_000020065.1	NC_011025.1	100	820453	820453	d__Bacteria;p__Firmicutes;c__Bacilli;o__Mycoplasmatales;f__Metamycoplasmataceae;g__Metamycoplasma	s__Metamycoplasma arthritidis
GCF_000020145.1	NC_010644.1	96.63	1643562	1643562	d__Bacteria;p__Elusimicrobiota;c__Elusimicrobia;o__Elusimicrobiales;f__Elusimicrobiaceae;g__Elusimicrobium	s__Elusimicrobium minutum
GCF_000020165.1	NC_010674.1	100	3847969	3800327	d__Bacteria;p__Firmicutes_A;c__Clostridia;o__Clostridiales;f__Clostridiaceae;g__Clostridium	s__Clostridium botulinum_B
GCF_000020225.1	NC_010655.1	97.96	2664102	2664102	d__Bacteria;p__Verrucomicrobiota;c__Verrucomicrobiae;o__Verrucomicrobiales;f__Akkermansiaceae;g__Akkermansia	s__Akkermansia muciniphila
GCF_000020305.1	NC_012026.1	100	1202435	1202435	d__Bacteria;p__Proteobacteria;c__Alphaproteobacteria;o__Rickettsiales;f__Anaplasmataceae;g__Anaplasma	s__Anaplasma marginale
GCF_000020325.1	NC_010730.1	99.19	1838442	1838442	d__Bacteria;p__Aquificota;c__Aquificae;o__Hydrogenothermales;f__Hydrogenothermaceae;g__Sulfurihydrogenibium	s__Sulfurihydrogenibium sp000020325
GCF_000020365.1	NC_012108.1	99.35	5657782	5589073	d__Bacteria;p__Desulfobacterota;c__Desulfobacteria;o__Desulfobacterales;f__Desulfobacteraceae;g__Desulfobacterium_B	s__Desulfobacterium_B autotrophicum
GCF_000020385.1	NC_010814.1	99.68	3994874	3917761	d__Bacteria;p__Desulfuromonadota;c__Desulfuromonadia;o__Geobacterales;f__Pelobacteraceae;g__Geobacter_C	s__Geobacter_C lovleyi
GCF_000020465.1	NC_010803.1	99.98	2763181	2763181	d__Bacteria;p__Bacteroidota;c__Chlorobia;o__Chlorobiales;f__Chlorobiaceae;g__Chlorobium	s__Chlorobium limicola
GCF_000020485.1	NC_011899.1	99.12	2578146	2578146	d__Bacteria;p__Firmicutes_F;c__Halanaerobiia;o__Halanaerobiales;f__Halothermotrichaceae;g__Halothermothrix	s__Halothermothrix orenii
GCF_000020505.1	NC_011027.1	98.89	2289249	2289249	d__Bacteria;p__Bacteroidota;c__Chlorobia;o__Chlorobiales;f__Chlorobiaceae;g__Chlorobaculum	s__Chlorobaculum parvum
GCF_000020525.1	NC_011026.1	99.45	3293456	3293456	d__Bacteria;p__Bacteroidota;c__Chlorobia;o__Chlorobiales;f__Chloroherpetonaceae;g__Chloroherpeton	s__Chloroherpeton thalassium
GCF_000020545.1	NC_010831.1	99.45	2736403	2736403	d__Bacteria;p__Bacteroidota;c__Chlorobia;o__Chlorobiales;f__Chlorobiaceae;g__Chlorobium_A	s__Chlorobium_A phaeobacteroides
GCF_000020565.1	NC_010830.1	81.31	1884364	1884364	d__Bacteria;p__Bacteroidota;c__Bacteroidia;o__Cytophagales;f__Amoebophilaceae;g__Amoebophilus	s__Amoebophilus asiaticus
GCF_000020585.3	NC_011138.3	99.85	4480937	4480937	d__Bacteria;p__Proteobacteria;c__Gammaproteobacteria;o__Enterobacterales;f__Alteromonadaceae;g__Alteromonas	s__Alteromonas mediterranea
GCF_000020605.1	NC_012781.1	99.28	3449685	3449685	d__Bacteria;p__Firmicutes_A;c__Clostridia;o__Lachnospirales;f__Lachnospiraceae;g__Agathobacter	s__Agathobacter rectale
GCF_000020625.1	NC_011059.1	98.9	2579695	2512923	d__Bacteria;p__Bacteroidota;c__Chlorobia;o__Chlorobiales;f__Chlorobiaceae;g__Prosthecochloris	s__Prosthecochloris aestuarii
GCF_000020645.1	NC_011060.1	98.9	3018238	3018238	d__Bacteria;p__Bacteroidota;c__Chlorobia;o__Chlorobiales;f__Chlorobiaceae;g__Chlorobium	s__Chlorobium phaeoclathratiforme
GCF_000020665.1	NC_011071.1	100	4573969	4573969	d__Bacteria;p__Proteobacteria;c__Gammaproteobacteria;o__Xanthomonadales;f__Xanthomonadaceae;g__Stenotrophomonas	s__Stenotrophomonas maltophilia_L
GCF_000020685.1	NC_012526.1	98.3	3855329	2819842	d__Bacteria;p__Deinococcota;c__Deinococci;o__Deinococcales;f__Deinococcaceae;g__Deinococcus	s__Deinococcus deserti
GCF_000020725.1	NC_011146.1	99.78	4615150	4615150	d__Bacteria;p__Desulfuromonadota;c__Desulfuromonadia;o__Geobacterales;f__Geobacteraceae;g__Geobacter_A	s__Geobacter_A bemidjiensis
GCF_000020785.1	NC_011126.1	100	1559514	1559514	d__Bacteria;p__Aquificota;c__Aquificae;o__Aquificales;f__Hydrogenobaculaceae;g__Hydrogenobaculum	s__Hydrogenobaculum sp000020785
GCF_000020945.1	NC_011295.1	100	1424912	1424912	d__Bacteria;p__Coprothermobacterota;c__Coprothermobacteria;o__Coprothermobacterales;f__Coprothermobacteraceae;g__Coprothermobacter	s__Coprothermobacter proteolyticus
GCF_000020965.1	NC_011297.1	100	1959987	1959987	d__Bacteria;p__Dictyoglomota;c__Dictyoglomia;o__Dictyoglomales;f__Dictyoglomaceae;g__Dictyoglomus	s__Dictyoglomus thermophilum
GCF_000020985.1	NC_011296.1	99.08	2003803	2003803	d__Bacteria;p__Nitrospirota;c__Thermodesulfovibrionia;o__Thermodesulfovibrionales;f__Thermodesulfovibrionaceae;g__Thermodesulfovibrio	s__Thermodesulfovibrio yellowstonii
GCF_000021285.1	NC_011653.1	96.39	2016657	2016657	d__Bacteria;p__Thermotogota;c__Thermotogae;o__Thermotogales;f__Fervidobacteriaceae;g__Thermosipho	s__Thermosipho africanus
GCF_000021305.1	NC_011772.1	99.01	5736823	5387334	d__Bacteria;p__Firmicutes;c__Bacilli;o__Bacillales;f__Bacillaceae_G;g__Bacillus_A	s__Bacillus_A thuringiensis_S
GCF_000021325.1	NC_011365.1	100	3914947	3887492	d__Bacteria;p__Proteobacteria;c__Alphaproteobacteria;o__Acetobacterales;f__Acetobacteraceae;g__Gluconacetobacter	s__Gluconacetobacter diazotrophicus
GCF_000021385.1	NC_011769.1	99.7	4040304	4040304	d__Bacteria;p__Desulfobacterota_A;c__Desulfovibrionia;o__Desulfovibrionales;f__Desulfovibrionaceae;g__Desulfovibrio_A	s__Desulfovibrio_A vulgaris_A
GCF_000021485.1	NC_011761.1	99.34	2982397	2982397	d__Bacteria;p__Proteobacteria;c__Gammaproteobacteria;o__Acidithiobacillales;f__Acidithiobacillaceae;g__Acidithiobacillus	s__Acidithiobacillus ferrooxidans
GCF_000021545.1	NC_012438.1	99.39	1640877	1640877	d__Bacteria;p__Aquificota;c__Aquificae;o__Hydrogenothermales;f__Hydrogenothermaceae;g__Sulfurihydrogenibium	s__Sulfurihydrogenibium azorense
GCF_000021565.1	NC_012440.1	99.8	1983966	1930284	d__Bacteria;p__Aquificota;c__Aquificae;o__Hydrogenothermales;f__Hydrogenothermaceae;g__Persephonella	s__Persephonella marina
GCF_000021645.1	NC_011661.1	100	1855560	1855560	d__Bacteria;p__Dictyoglomota;c__Dictyoglomia;o__Dictyoglomales;f__Dictyoglomaceae;g__Dictyoglomus	s__Dictyoglomus turgidum
GCF_000021685.1	NC_011959.1	98.13	2920744	2003006	d__Bacteria;p__Chloroflexota;c__Chloroflexia;o__Thermomicrobiales;f__Thermomicrobiaceae;g__Thermomicrobium	s__Thermomicrobium roseum
GCF_000021725.1	NC_012115.1	99.59	1676444	1676444	d__Bacteria;p__Campylobacterota;c__Campylobacteria;o__Nautiliales;f__Nautiliaceae;g__Nautilia	s__Nautilia profundicola
GCF_000021745.1	NC_011666.1	99.37	4305430	4305430	d__Bacteria;p__Proteobacteria;c__Alphaproteobacteria;o__Rhizobiales;f__Beijerinckiaceae;g__Methylocella	s__Methylocella silvestris
GCF_000021805.1	NC_011726.1	99.56	4787694	4679413	d__Bacteria;p__Cyanobacteria;c__Cyanobacteriia;o__Cyanobacteriales;f__Microcystaceae;g__Cyanothece_A	s__Cyanothece_A sp000021805
GCF_000021825.1	NC_011729.1	99.71	6554169	5942652	d__Bacteria;p__Cyanobacteria;c__Cyanobacteriia;o__Cyanobacteriales;f__Microcystaceae;g__Cyanothece_B	s__Cyanothece_B sp000021825
GCF_000021865.1	NC_014034.1	99.09	3871920	3738958	d__Bacteria;p__Proteobacteria;c__Alphaproteobacteria;o__Rhodobacterales;f__Rhodobacteraceae;g__Rhodobacter	s__Rhodobacter capsulatus_B
GCF_000021925.1	NC_011830.1	98.98	5279134	5279134	d__Bacteria;p__Firmicutes_B;c__Desulfitobacteriia;o__Desulfitobacteriales;f__Desulfitobacteriaceae;g__Desulfitobacterium	s__Desulfitobacterium hafniense
GCF_000021945.1	NC_011831.1	99.69	4684931	4684931	d__Bacteria;p__Chloroflexota;c__Chloroflexia;o__Chloroflexales;f__Chloroflexaceae;g__Chloroflexus	s__Chloroflexus aggregans
GCF_000021985.1	NC_011901.1	99.88	3464554	3464554	d__Bacteria;p__Proteobacteria;c__Gammaproteobacteria;o__Ectothiorhodospirales;f__Ectothiorhodospiraceae;g__Thioalkalivibrio_A	s__Thioalkalivibrio_A sulfidiphilus
GCF_000022025.1	NC_011886.1	99.71	4980870	4395537	d__Bacteria;p__Actinobacteriota;c__Actinobacteria;o__Actinomycetales;f__Micrococcaceae;g__Pseudarthrobacter	s__Pseudarthrobacter chlorophenolicus
GCF_000022045.1	NC_011884.1	99.29	5786110	5374574	d__Bacteria;p__Cyanobacteria;c__Cyanobacteriia;o__Thermosynechococcales;f__Thermosynechococcaceae;g__Cyanothece	s__Cyanothece sp000022045
GCF_000022065.1	NC_011898.1	99.32	4068724	4068724	d__Bacteria;p__Firmicutes_A;c__Clostridia;o__Acetivibrionales;f__Acetivibrionaceae;g__Ruminiclostridium_A	s__Ruminiclostridium_A cellulolyticum
GCF_000022085.1	NC_011894.1	99.84	8839022	7772460	d__Bacteria;p__Proteobacteria;c__Alphaproteobacteria;o__Rhizobiales;f__Beijerinckiaceae;g__Methylobacterium	s__Methylobacterium nodulans
GCF_000022125.1	NC_011883.1	99.41	2873437	2873437	d__Bacteria;p__Desulfobacterota_A;c__Desulfovibrionia;o__Desulfovibrionales;f__Desulfovibrionaceae;g__Desulfovibrio	s__Desulfovibrio desulfuricans_A
GCF_000022145.1	NC_011891.1	99.35	5029329	5029329	d__Bacteria;p__Myxococcota;c__Myxococcia;o__Myxococcales;f__Anaeromyxobacteraceae;g__Anaeromyxobacter	s__Anaeromyxobacter dehalogenans
GCF_000022265.1	NC_011979.1	99.35	4304501	4304501	d__Bacteria;p__Desulfuromonadota;c__Desulfuromonadia;o__Geobacterales;f__Geobacteraceae;g__Geobacter_B	s__Geobacter_B daltonii
GCF_000022325.1	NC_012034.1	100	2931662	2919718	d__Bacteria;p__Firmicutes_A;c__Thermoanaerobacteria;o__Caldicellulosiruptorales;f__Caldicellulosiruptoraceae;g__Caldicellulosiruptor	s__Caldicellulosiruptor bescii
GCF_000022525.1	NC_013009.1	99.26	879977	879977	d__Bacteria;p__Proteobacteria;c__Alphaproteobacteria;o__Rickettsiales;f__Anaplasmataceae;g__Neorickettsia	s__Neorickettsia risticii
GCF_000022565.1	NC_012483.1	100	4127356	4127356	d__Bacteria;p__Acidobacteriota;c__Acidobacteriae;o__Acidobacteriales;f__Acidobacteriaceae;g__Acidobacterium	s__Acidobacterium capsulatum
GCF_000022605.2	NC_013454.1	98.82	640935	636850	d__Bacteria;p__Bacteroidota;c__Bacteroidia;o__Flavobacteriales;f__Blattabacteriaceae;g__Blattabacterium	s__Blattabacterium sp000022605
GCF_000022905.1	NC_012590.1	99.56	2819226	2790189	d__Bacteria;p__Actinobacteriota;c__Actinobacteria;o__Mycobacteriales;f__Mycobacteriaceae;g__Corynebacterium	s__Corynebacterium aurimucosum
GCF_000023025.1	NC_012997.1	100	5193164	5193164	d__Bacteria;p__Proteobacteria;c__Gammaproteobacteria;o__Pseudomonadales;f__Cellvibrionaceae;g__Teredinibacter	s__Teredinibacter turnerae_B
GCF_000023065.1	NC_012691.1	100	3471292	3471292	d__Bacteria;p__Proteobacteria;c__Gammaproteobacteria;o__Enterobacterales;f__Aeromonadaceae;g__Tolumonas	s__Tolumonas auensis
GCF_000023105.1	NC_012669.1	99.71	4669183	4669183	d__Bacteria;p__Actinobacteriota;c__Actinobacteria;o__Actinomycetales;f__Beutenbergiaceae;g__Beutenbergia	s__Beutenbergia cavernae
GCF_000023125.1	NC_013037.1	99.7	6967790	6967790	d__Bacteria;p__Bacteroidota;c__Bacteroidia;o__Cytophagales;f__Spirosomaceae;g__Dyadobacter	s__Dyadobacter fermentans
GCF_000023145.1	NC_012704.1	97.86	2446804	2446804	d__Bacteria;p__Actinobacteriota;c__Actinobacteria;o__Mycobacteriales;f__Mycobacteriaceae;g__Corynebacterium	s__Corynebacterium kroppenstedtii
GCF_000023185.1	NC_012850.1	99.94	7418122	4767043	d__Bacteria;p__Proteobacteria;c__Alphaproteobacteria;o__Rhizobiales;f__Rhizobiaceae;g__Rhizobium	s__Rhizobium leguminosarum_J
GCF_000023205.1	NC_012803.1	98.25	2501097	2501097	d__Bacteria;p__Actinobacteriota;c__Actinobacteria;o__Actinomycetales;f__Micrococcaceae;g__Micrococcus	s__Micrococcus luteus
GCF_000023225.1	NC_013173.1	99.96	3942657	3942657	d__Bacteria;p__Desulfobacterota_A;c__Desulfovibrionia;o__Desulfovibrionales;f__Desulfomicrobiaceae;g__Desulfomicrobium	s__Desulfomicrobium baculatum
GCF_000023245.1	NC_013093.1	100	8248144	8248144	d__Bacteria;p__Actinobacteriota;c__Actinobacteria;o__Mycobacteriales;f__Pseudonocardiaceae;g__Actinosynnema	s__Actinosynnema mirum
GCF_000023265.1	NC_013124.1	94.87	2158157	2158157	d__Bacteria;p__Actinobacteriota;c__Acidimicrobiia;o__Acidimicrobiales;f__Acidimicrobiaceae;g__Acidimicrobium	s__Acidimicrobium ferrooxidans
GCF_000023285.1	NC_013162.1	100	2612925	2612925	d__Bacteria;p__Bacteroidota;c__Bacteroidia;o__Flavobacteriales;f__Flavobacteriaceae;g__Capnocytophaga	s__Capnocytophaga ochracea
GCF_000023325.1	NC_012785.1	100	2302126	2302126	d__Bacteria;p__Thermotogota;c__Thermotogae;o__Petrotogales;f__Kosmotogaceae;g__Kosmotoga	s__Kosmotoga olearia
GCF_000023405.1	NC_013172.1	100	3614992	3614992	d__Bacteria;p__Actinobacteriota;c__Actinobacteria;o__Actinomycetales;f__Dermabacteraceae;g__Brachybacterium	s__Brachybacterium faecium
GCF_000023445.1	NC_012881.1	100	4289847	4289847	d__Bacteria;p__Desulfobacterota_A;c__Desulfovibrionia;o__Desulfovibrionales;f__Desulfovibrionaceae;g__Desulfovibrio_H	s__Desulfovibrio_H salexigens
GCF_000023465.1	NC_014041.1	99.62	5128187	5128187	d__Bacteria;p__Bacteroidota;c__Bacteroidia;o__Flavobacteriales;f__Flavobacteriaceae;g__Zunongwangia	s__Zunongwangia profunda
GCF_000023585.1	NC_012914.1	99.73	7184930	7184930	d__Bacteria;p__Firmicutes_I;c__Bacilli_A;o__Paenibacillales;f__Paenibacillaceae;g__Paenibacillus_C	s__Paenibacillus_C sp000023585
GCF_000023605.1	NC_012917.1	99.97	4862913	4862913	d__Bacteria;p__Proteobacteria;c__Gammaproteobacteria;o__Enterobacterales;f__Enterobacteriaceae;g__Pectobacterium	s__Pectobacterium carotovorum_B
GCF_000023645.1	NC_012918.1	100	4745806	4745806	d__Bacteria;p__Desulfuromonadota;c__Desulfuromonadia;o__Geobacterales;f__Geobacteraceae;g__Geobacter_A	s__Geobacter_A sp000023645
GCF_000023705.1	NC_012968.1	99.57	2547570	2547570	d__Bacteria;p__Proteobacteria;c__Gammaproteobacteria;o__Burkholderiales;f__Methylophilaceae;g__Methylotenera	s__Methylotenera mobilis
GCF_000023725.1	NC_013062.1	100	2768102	2768102	d__Bacteria;p__Bacteroidota;c__Bacteroidia;o__Flavobacteriales;f__Weeksellaceae;g__Chryseobacterium_A	s__Chryseobacterium_A sp000023725
GCF_000023745.1	NC_012969.1	99.57	3082007	2995511	d__Bacteria;p__Proteobacteria;c__Gammaproteobacteria;o__Burkholderiales;f__Methylophilaceae;g__Methylovorus	s__Methylovorus glucosotrophus
GCF_000023785.1	NC_012982.1	99.57	3540114	3455622	d__Bacteria;p__Proteobacteria;c__Alphaproteobacteria;o__Caulobacterales;f__Hyphomonadaceae;g__Hirschia	s__Hirschia baltica
GCF_000023825.1	NC_013061.1	100	5167383	5167383	d__Bacteria;p__Bacteroidota;c__Bacteroidia;o__Sphingobacteriales;f__Sphingobacteriaceae;g__Pedobacter	s__Pedobacter heparinus
GCF_000023845.1	NC_013170.1	100	1617804	1617804	d__Bacteria;p__Actinobacteriota;c__Coriobacteriia;o__Coriobacteriales;f__Eggerthellaceae;g__Cryptobacterium	s__Cryptobacterium curtum
GCF_000023865.1	NC_013159.1	100	4308349	4308349	d__Bacteria;p__Actinobacteriota;c__Actinobacteria;o__Mycobacteriales;f__Pseudonocardiaceae;g__Saccharomonospora	s__Saccharomonospora viridis
GCF_000023885.1	NC_013165.1	100	3165038	3165038	d__Bacteria;p__Actinobacteriota;c__Coriobacteriia;o__Coriobacteriales;f__Eggerthellaceae;g__Slackia	s__Slackia heliotrinireducens
GCF_000023905.1	NC_013192.1	100	2465610	2465610	d__Bacteria;p__Fusobacteriota;c__Fusobacteriia;o__Fusobacteriales;f__Leptotrichiaceae;g__Leptotrichia	s__Leptotrichia buccalis
GCF_000023925.1	NC_013169.1	94.68	2785024	2785024	d__Bacteria;p__Actinobacteriota;c__Actinobacteria;o__Actinomycetales;f__Dermatophilaceae;g__Kytococcus	s__Kytococcus sedentarius
GCF_000024005.1	NC_013132.1	99.51	9127347	9127347	d__Bacteria;p__Bacteroidota;c__Bacteroidia;o__Chitinophagales;f__Chitinophagaceae;g__Chitinophaga	s__Chitinophaga pinensis
GCF_000024025.1	NC_013131.1	99.74	10467782	10467782	d__Bacteria;p__Actinobacteriota;c__Actinobacteria;o__Streptomycetales;f__Catenulisporaceae;g__Catenulispora	s__Catenulispora acidiphila
GCF_000024065.1	NC_013174.1	100	2749646	2749646	d__Bacteria;p__Actinobacteriota;c__Actinobacteria;o__Actinomycetales;f__Cellulomonadaceae;g__Jonesia	s__Jonesia denitrificans
GCF_000024085.1	NC_013166.1	100	2852073	2852073	d__Bacteria;p__Proteobacteria;c__Gammaproteobacteria;o__Enterobacterales;f__Kangiellaceae;g__Kangiella	s__Kangiella koreensis
GCF_000024105.1	NC_013171.1	99.39	1998633	1883067	d__Bacteria;p__Firmicutes_A;c__Clostridia;o__Tissierellales;f__Helcococcaceae;g__Anaerococcus	s__Anaerococcus prevotii
GCF_000024125.1	NC_013222.1	99.01	3530383	3530383	d__Bacteria;p__Bacteroidota;c__Bacteroidia;o__Flavobacteriales;f__Flavobacteriaceae;g__Robiginitalea	s__Robiginitalea biformata
GCF_000024165.1	NC_013194.1	99.84	5306133	5058518	d__Bacteria;p__Proteobacteria;c__Gammaproteobacteria;o__Burkholderiales;f__Rhodocyclaceae;g__Accumulibacter	s__Accumulibacter phosphatis_C
GCF_000024205.1	NC_013216.1	99.27	4545624	4545624	d__Bacteria;p__Firmicutes_B;c__Desulfotomaculia;o__Desulfotomaculales;f__Desulfotomaculaceae_B;g__Desulfotomaculum_F	s__Desulfotomaculum_F acetoxidans
GCF_000024225.1	NC_013203.1	100	1543805	1543805	d__Bacteria;p__Actinobacteriota;c__Coriobacteriia;o__Coriobacteriales;f__Atopobiaceae;g__Lancefieldella	s__Lancefieldella parvula
GCF_000024265.1	NC_013204.1	100	3632260	3632260	d__Bacteria;p__Actinobacteriota;c__Coriobacteriia;o__Coriobacteriales;f__Eggerthellaceae;g__Eggerthella	s__Eggerthella lenta
GCF_000024285.1	NC_013205.1	99.21	3205686	3018755	d__Bacteria;p__Firmicutes_K;c__Alicyclobacillia;o__Alicyclobacillales;f__Alicyclobacillaceae;g__Alicyclobacillus	s__Alicyclobacillus acidocaldarius
GCF_000024325.1	NC_013223.1	100	2909567	2864304	d__Bacteria;p__Desulfobacterota_A;c__Desulfovibrionia;o__Desulfovibrionales;f__Desulfohalobiaceae;g__Desulfohalobium	s__Desulfohalobium retbaense
GCF_000024345.1	NC_013729.1	100	7579488	7579488	d__Bacteria;p__Actinobacteriota;c__Actinobacteria;o__Propionibacteriales;f__Kribbellaceae;g__Kribbella	s__Kribbella flavida
GCF_000024365.1	NC_013235.1	99.93	6060298	6060298	d__Bacteria;p__Actinobacteriota;c__Actinobacteria;o__Mycobacteriales;f__Nakamurellaceae;g__Nakamurella	s__Nakamurella multipartita
GCF_000024385.1	NC_013510.1	100	5639016	5639016	d__Bacteria;p__Actinobacteriota;c__Actinobacteria;o__Streptosporangiales;f__Streptosporangiaceae;g__Thermomonospora	s__Thermomonospora curvata
GCF_000024405.1	NC_013517.1	100	4486650	4418842	d__Bacteria;p__Fusobacteriota;c__Fusobacteriia;o__Fusobacteriales;f__Leptotrichiaceae;g__Sebaldella	s__Sebaldella termitidis
GCF_000024425.1	NC_013946.1	99.57	3097457	3097457	d__Bacteria;p__Deinococcota;c__Deinococci;o__Deinococcales;f__Thermaceae;g__Meiothermus	s__Meiothermus ruber
GCF_000024465.1	NC_014010.1	99.94	2753527	2753527	d__Bacteria;p__Proteobacteria;c__Alphaproteobacteria;o__Puniceispirillales;f__Puniceispirillaceae;g__Puniceispirillum	s__Puniceispirillum marinum
GCF_000024505.1	NC_013532.1	100	1206806	1206806	d__Bacteria;p__Proteobacteria;c__Alphaproteobacteria;o__Rickettsiales;f__Anaplasmataceae;g__Anaplasma	s__Anaplasma centrale
GCF_000024545.1	NC_013947.1	99.55	6841557	6841557	d__Bacteria;p__Actinobacteriota;c__Actinobacteria;o__Mycobacteriales;f__Micromonosporaceae;g__Stackebrandtia	s__Stackebrandtia nassauensis
GCF_000024565.1	NC_013515.1	98.88	1673280	1662578	d__Bacteria;p__Fusobacteriota;c__Fusobacteriia;o__Fusobacteriales;f__Leptotrichiaceae;g__Streptobacillus	s__Streptobacillus moniliformis
GCF_000024605.1	NC_013385.1	95.84	2157067	2129237	d__Bacteria;p__Firmicutes_B;c__Desulfotomaculia;o__Ammonifexales;f__Ammonificaceae;g__Ammonifex	s__Ammonifex degensii
GCF_000024725.1	NC_013960.1	99.47	4145260	4079427	d__Bacteria;p__Proteobacteria;c__Gammaproteobacteria;o__Nitrosococcales;f__Nitrosococcaceae;g__Nitrosococcus	s__Nitrosococcus halophilus
GCF_000024765.1	NC_013422.1	100	2582886	2582886	d__Bacteria;p__Proteobacteria;c__Gammaproteobacteria;o__Halothiobacillales;f__Halothiobacillaceae;g__Halothiobacillus	s__Halothiobacillus neapolitanus
GCF_000024785.1	NC_013441.1	100	5290012	5208602	d__Bacteria;p__Actinobacteriota;c__Actinobacteria;o__Mycobacteriales;f__Mycobacteriaceae;g__Gordonia	s__Gordonia bronchialis
GCF_000024805.1	NC_013440.1	98.39	9446314	9446314	d__Bacteria;p__Myxococcota;c__Polyangia;o__Haliangiales;f__Haliangiaceae;g__Haliangium	s__Haliangium ochraceum
GCF_000024845.1	NC_013501.1	100	3386737	3261604	d__Bacteria;p__Bacteroidota;c__Rhodothermia;o__Rhodothermales;f__Rhodothermaceae;g__Rhodothermus	s__Rhodothermus marinus
GCF_000024865.1	NC_013595.1	99.29	10369518	10341314	d__Bacteria;p__Actinobacteriota;c__Actinobacteria;o__Streptosporangiales;f__Streptosporangiaceae;g__Streptosporangium	s__Streptosporangium roseum
GCF_000024885.1	NC_013512.1	99.87	2306351	2306351	d__Bacteria;p__Campylobacterota;c__Campylobacteria;o__Campylobacterales;f__Sulfurospirillaceae;g__Sulfurospirillum	s__Sulfurospirillum deleyianum
GCF_000024905.1	NC_013522.1	98.31	1848474	1848474	d__Bacteria;p__Synergistota;c__Synergistia;o__Synergistales;f__Synergistaceae;g__Thermanaerovibrio	s__Thermanaerovibrio acidaminovorans
GCF_000024925.1	NC_013521.1	100	4253413	4253413	d__Bacteria;p__Actinobacteriota;c__Actinobacteria;o__Actinomycetales;f__Cellulomonadaceae;g__Sanguibacter	s__Sanguibacter keddieii
GCF_000024945.1	NC_013520.1	100	2132142	2132142	d__Bacteria;p__Firmicutes_C;c__Negativicutes;o__Veillonellales;f__Veillonellaceae;g__Veillonella	s__Veillonella parvula
GCF_000024965.1	NC_013530.1	100	3831380	3742776	d__Bacteria;p__Actinobacteriota;c__Actinobacteria;o__Actinomycetales;f__Cellulomonadaceae;g__Xylanimonas	s__Xylanimonas cellulosilytica
GCF_000025125.1	NC_013771.1	73.92	1443806	1443806	d__Bacteria;p__Cyanobacteria;c__Cyanobacteriia;o__Cyanobacteriales;f__Microcystaceae;g__Atelocyanobacterium	s__Atelocyanobacterium thalassa_B
GCF_000025185.1	NC_013720.1	98.78	6196199	6196199	d__Bacteria;p__Planctomycetota;c__Planctomycetes;o__Pirellulales;f__Pirellulaceae;g__Pirellula	s__Pirellula staleyi
GCF_000025205.1	NC_013721.1	99.93	1617545	1617545	d__Bacteria;p__Actinobacteriota;c__Actinobacteria;o__Actinomycetales;f__Bifidobacteriaceae;g__Bifidobacterium	s__Bifidobacterium vaginale_G
GCF_000025225.2	NC_013895.2	93.74	1809746	1809746	d__Bacteria;p__Firmicutes_A;c__Clostridia;o__Saccharofermentanales;f__Mageeibacillaceae;g__Mageeibacillus	s__Mageeibacillus indolicus
GCF_000025265.1	NC_013739.1	98.29	6359369	6359369	d__Bacteria;p__Actinobacteriota;c__Thermoleophilia;o__Solirubrobacterales;f__Solirubrobacteraceae;g__Conexibacter	s__Conexibacter woesei
GCF_000025305.1	NC_013740.1	99.98	2329769	2329769	d__Bacteria;p__Firmicutes_C;c__Negativicutes;o__Acidaminococcales;f__Acidaminococcaceae;g__Acidaminococcus	s__Acidaminococcus fermentans
GCF_000025345.1	NC_013757.1	99.37	5322497	5322497	d__Bacteria;p__Actinobacteriota;c__Actinobacteria;o__Mycobacteriales;f__Geodermatophilaceae;g__Geodermatophilus	s__Geodermatophilus obscurus
GCF_000025485.1	NC_013851.1	99.74	3669074	3526903	d__Bacteria;p__Proteobacteria;c__Gammaproteobacteria;o__Chromatiales;f__Chromatiaceae;g__Allochromatium	s__Allochromatium vinosum
GCF_000025545.1	NC_013889.1	99.97	2985056	2744800	d__Bacteria;p__Proteobacteria;c__Gammaproteobacteria;o__Ectothiorhodospirales;f__Thioalkalivibrionaceae;g__Thioalkalivibrio	s__Thioalkalivibrio sp000025545
GCF_000025565.1	NC_014121.1	100	5598796	5314581	d__Bacteria;p__Proteobacteria;c__Gammaproteobacteria;o__Enterobacterales;f__Enterobacteriaceae;g__Enterobacter	s__Enterobacter cloacae
GCF_000025605.1	NC_013894.1	99.39	1500577	1500577	d__Bacteria;p__Aquificota;c__Aquificae;o__Aquificales;f__Aquificaceae;g__Thermocrinis	s__Thermocrinis albus
GCF_000025705.1	NC_013959.1	99.52	3003656	3003656	d__Bacteria;p__Proteobacteria;c__Gammaproteobacteria;o__Burkholderiales;f__Gallionellaceae;g__Sideroxydans	s__Sideroxydans lithotrophicus
GCF_000025725.1	NC_013943.1	98.22	3222077	3222077	d__Bacteria;p__Deferribacterota;c__Deferribacteres;o__Deferribacterales;f__Denitrovibrionaceae;g__Denitrovibrio	s__Denitrovibrio acetiphilus
GCF_000025845.1	NC_014014.1	100	934379	934379	d__Bacteria;p__Firmicutes;c__Bacilli;o__Mycoplasmatales;f__Metamycoplasmataceae;g__Mycoplasmopsis_A	s__Mycoplasmopsis_A crocodyli
GCF_000025885.1	NC_014011.1	100	1980592	1980592	d__Bacteria;p__Synergistota;c__Synergistia;o__Synergistales;f__Aminobacteriaceae;g__Aminobacterium	s__Aminobacterium colombiense
GCF_000025905.1	NC_014008.1	99.77	3750771	3750771	d__Bacteria;p__Verrucomicrobiota;c__Verrucomicrobiae;o__Opitutales;f__Puniceicoccaceae;g__Coraliomargarita	s__Coraliomargarita akajimensis
GCF_000025925.1	NC_014033.1	99.63	3619559	3619559	d__Bacteria;p__Bacteroidota;c__Bacteroidia;o__Bacteroidales;f__Bacteroidaceae;g__Prevotella	s__Prevotella ruminicola
GCF_000025945.1	NC_006138.1	97.29	3659634	3523383	d__Bacteria;p__Desulfobacterota;c__Desulfobulbia;o__Desulfobulbales;f__Desulfocapsaceae;g__Desulfotalea	s__Desulfotalea psychrophila
GCF_000025965.1	NC_006513.1	100	4727255	4296230	d__Bacteria;p__Proteobacteria;c__Gammaproteobacteria;o__Burkholderiales;f__Rhodocyclaceae;g__Aromatoleum	s__Aromatoleum aromaticum
GCF_000025985.1	NC_003228.3	99.26	5241700	5205140	d__Bacteria;p__Bacteroidota;c__Bacteroidia;o__Bacteroidales;f__Bacteroidaceae;g__Bacteroides	s__Bacteroides fragilis
GCF_000026005.1	NC_005295.2	100	1516355	1516355	d__Bacteria;p__Proteobacteria;c__Alphaproteobacteria;o__Rickettsiales;f__Anaplasmataceae;g__Ehrlichia	s__Ehrlichia ruminantium
GCF_000026105.1	NC_008027.1	100	5888780	5888780	d__Bacteria;p__Proteobacteria;c__Gammaproteobacteria;o__Pseudomonadales;f__Pseudomonadaceae;g__Pseudomonas_E	s__Pseudomonas_E entomophila
GCF_000026125.1	NC_009138.1	99.92	3424307	3424307	d__Bacteria;p__Proteobacteria;c__Gammaproteobacteria;o__Burkholderiales;f__Burkholderiaceae;g__Herminiimonas	s__Herminiimonas arsenicoxydans
GCF_000026145.1	NC_009445.1	99.09	7456587	7456587	d__Bacteria;p__Proteobacteria;c__Alphaproteobacteria;o__Rhizobiales;f__Xanthobacteraceae;g__Bradyrhizobium	s__Bradyrhizobium sp000026145
GCF_000026185.1	NC_010694.1	99.64	4067864	3883467	d__Bacteria;p__Proteobacteria;c__Gammaproteobacteria;o__Enterobacterales;f__Enterobacteriaceae;g__Erwinia	s__Erwinia tasmaniensis
GCF_000026205.1	NC_011047.1	95.43	601943	601943	d__Bacteria;p__Firmicutes;c__Bacilli;o__Acholeplasmatales;f__Acholeplasmataceae;g__Phytoplasma	s__Phytoplasma mali
GCF_000026225.1	NC_011740.1	99.9	4643861	4588711	d__Bacteria;p__Proteobacteria;c__Gammaproteobacteria;o__Enterobacterales;f__Enterobacteriaceae;g__Escherichia	s__Escherichia fergusonii
GCF_000027065.2	NC_013282.2	99.97	4599092	4384463	d__Bacteria;p__Proteobacteria;c__Gammaproteobacteria;o__Enterobacterales;f__Enterobacteriaceae;g__Cronobacter	s__Cronobacter turicensis
GCF_000027145.1	NC_013891.1	99.45	2797636	2797636	d__Bacteria;p__Firmicutes;c__Bacilli;o__Lactobacillales;f__Listeriaceae;g__Listeria	s__Listeria seeligeri
GCF_000027165.1	NC_013853.1	99.82	2146611	2146611	d__Bacteria;p__Firmicutes;c__Bacilli;o__Lactobacillales;f__Streptococcaceae;g__Streptococcus	s__Streptococcus mitis_AR
GCF_000027225.1	NC_013892.1	100	4225498	4225498	d__Bacteria;p__Proteobacteria;c__Gammaproteobacteria;o__Enterobacterales;f__Enterobacteriaceae;g__Xenorhabdus	s__Xenorhabdus bovienii_C
GCF_000027325.1	NC_000908.2	99.25	580076	580076	d__Bacteria;p__Firmicutes;c__Bacilli;o__Mycoplasmatales;f__Mycoplasmoidaceae;g__Mycoplasmoides	s__Mycoplasmoides genitalium
GCF_000043285.1	NC_005061.1	98.37	705557	705557	d__Bacteria;p__Proteobacteria;c__Gammaproteobacteria;o__Enterobacterales;f__Enterobacteriaceae;g__Blochmannia	s__Blochmannia floridanus
GCF_000046705.1	NC_005956.1	100	1931047	1931047	d__Bacteria;p__Proteobacteria;c__Alphaproteobacteria;o__Rhizobiales;f__Rhizobiaceae;g__Bartonella	s__Bartonella henselae
GCF_000055785.1	NC_007963.1	99.14	3696649	3696649	d__Bacteria;p__Proteobacteria;c__Gammaproteobacteria;o__Pseudomonadales;f__Halomonadaceae;g__Chromohalobacter	s__Chromohalobacter salexigens
GCF_000055945.1	NC_008011.1	93.49	1719014	1457619	d__Bacteria;p__Desulfobacterota_A;c__Desulfovibrionia;o__Desulfovibrionales;f__Desulfovibrionaceae;g__Lawsonia	s__Lawsonia intracellularis
GCF_000058485.1	NC_008278.1	99.65	7497934	7497934	d__Bacteria;p__Actinobacteriota;c__Actinobacteria;o__Frankiales;f__Frankiaceae;g__Frankia	s__Frankia alni
GCF_000060285.1	NC_008555.1	99.45	2814130	2814130	d__Bacteria;p__Firmicutes;c__Bacilli;o__Lactobacillales;f__Listeriaceae;g__Listeria	s__Listeria welshimeri
GCF_000060345.1	NC_008571.1	99.62	3798465	3798465	d__Bacteria;p__Bacteroidota;c__Bacteroidia;o__Flavobacteriales;f__Flavobacteriaceae;g__Gramella	s__Gramella forsetii
GCF_000062885.1	NC_009142.1	100	8212805	8212805	d__Bacteria;p__Actinobacteriota;c__Actinobacteria;o__Mycobacteriales;f__Pseudonocardiaceae;g__Saccharopolyspora	s__Saccharopolyspora erythraea
GCF_000063505.1	NC_009481.1	99.18	2366980	2366980	d__Bacteria;p__Cyanobacteria;c__Cyanobacteriia;o__Synechococcales;f__Cyanobiaceae;g__Synechococcus_C	s__Synechococcus_C sp000063505
GCF_000063525.1	NC_009482.1	99.64	2224914	2224914	d__Bacteria;p__Cyanobacteria;c__Cyanobacteriia;o__Synechococcales;f__Cyanobiaceae;g__RCC307	s__RCC307 sp000063525
GCF_000063605.1	NC_009497.1	100	877438	877438	d__Bacteria;p__Firmicutes;c__Bacilli;o__Mycoplasmatales;f__Metamycoplasmataceae;g__Mycoplasmopsis	s__Mycoplasmopsis agalactiae
GCF_000067165.1	NC_010162.1	94.19	13033779	13033779	d__Bacteria;p__Myxococcota;c__Polyangia;o__Polyangiales;f__Polyangiaceae;g__Sorangium	s__Sorangium cellulosum_B
GCF_000067205.1	NC_010170.1	100	5287950	5287950	d__Bacteria;p__Proteobacteria;c__Gammaproteobacteria;o__Burkholderiales;f__Burkholderiaceae;g__Bordetella_A	s__Bordetella_A petrii
GCF_000069185.1	NC_010397.1	100	5090491	5067172	d__Bacteria;p__Actinobacteriota;c__Actinobacteria;o__Mycobacteriales;f__Mycobacteriaceae;g__Mycobacteroides	s__Mycobacteroides abscessus
GCF_000069225.1	NC_010407.1	99.49	3403786	3258645	d__Bacteria;p__Actinobacteriota;c__Actinobacteria;o__Actinomycetales;f__Microbacteriaceae;g__Clavibacter	s__Clavibacter sepedonicus
GCF_000069925.1	NC_010544.1	98.55	879959	879959	d__Bacteria;p__Firmicutes;c__Bacilli;o__Acholeplasmatales;f__Acholeplasmataceae;g__Phytoplasma	s__Phytoplasma australiense
GCF_000069945.1	NC_010545.1	100	2369219	2369219	d__Bacteria;p__Actinobacteriota;c__Actinobacteria;o__Mycobacteriales;f__Mycobacteriaceae;g__Corynebacterium	s__Corynebacterium urealyticum
GCF_000070465.1	NC_010645.1	100	3732255	3732255	d__Bacteria;p__Proteobacteria;c__Gammaproteobacteria;o__Burkholderiales;f__Burkholderiaceae;g__Bordetella	s__Bordetella avium
GCF_000085865.1	NC_013511.1	100	665445	665445	d__Bacteria;p__Firmicutes;c__Bacilli;o__Mycoplasmatales;f__Metamycoplasmataceae;g__Metamycoplasma	s__Metamycoplasma hominis
GCF_000090965.1	NC_008513.1	98.59	422434	416380	d__Bacteria;p__Proteobacteria;c__Gammaproteobacteria;o__Enterobacterales;f__Enterobacteriaceae;g__Buchnera	s__Buchnera aphidicola_F
GCF_000091305.1	NC_013929.1	100	10148695	10148695	d__Bacteria;p__Actinobacteriota;c__Actinobacteria;o__Streptomycetales;f__Streptomycetaceae;g__Streptomyces	s__Streptomyces scabiei
GCF_000091325.1	NC_014012.1	99.84	4962103	4962103	d__Bacteria;p__Proteobacteria;c__Gammaproteobacteria;o__Enterobacterales;f__Shewanellaceae;g__Shewanella	s__Shewanella violacea
GCF_000091545.1	NC_006461.1	99.58	2116056	1849742	d__Bacteria;p__Deinococcota;c__Deinococci;o__Deinococcales;f__Thermaceae;g__Thermus	s__Thermus thermophilus
GCF_000091785.1	NC_013861.1	100	4149158	4077332	d__Bacteria;p__Proteobacteria;c__Gammaproteobacteria;o__Legionellales;f__Legionellaceae;g__Legionella	s__Legionella longbeachae
GCF_000092025.1	NC_003062.2	100	5674258	2841580	d__Bacteria;p__Proteobacteria;c__Alphaproteobacteria;o__Rhizobiales;f__Rhizobiaceae;g__Agrobacterium	s__Agrobacterium fabrum_B
GCF_000092045.1	NC_007761.1	99.94	6530228	4381608	d__Bacteria;p__Proteobacteria;c__Alphaproteobacteria;o__Rhizobiales;f__Rhizobiaceae;g__Rhizobium	s__Rhizobium etli
GCF_000092105.1	NC_014148.1	99.93	5460085	5423075	d__Bacteria;p__Planctomycetota;c__Planctomycetes;o__Planctomycetales;f__Planctomycetaceae;g__Planctopirus	s__Planctopirus limnophila
GCF_000092125.1	NC_014212.1	99.79	3721669	3249394	d__Bacteria;p__Deinococcota;c__Deinococci;o__Deinococcales;f__Thermaceae;g__Meiothermus_B	s__Meiothermus_B silvanus
GCF_000092205.1	NC_014216.1	99.4	3097763	3097763	d__Bacteria;p__Desulfobacterota;c__Desulfobulbia;o__Desulfobulbales;f__Desulfurivibrionaceae;g__Desulfurivibrio	s__Desulfurivibrio alkaliphilus
GCF_000092225.1	NC_014158.1	99.94	4479724	4379918	d__Bacteria;p__Actinobacteriota;c__Actinobacteria;o__Mycobacteriales;f__Mycobacteriaceae;g__Tsukamurella	s__Tsukamurella paurometabola
GCF_000092245.1	NC_014166.1	99.59	3192235	3192235	d__Bacteria;p__Campylobacterota;c__Campylobacteria;o__Campylobacterales;f__Arcobacteraceae;g__Arcobacter	s__Arcobacter nitrofigilis
GCF_000092285.1	NC_014100.1	99.68	4655622	4655622	d__Bacteria;p__Proteobacteria;c__Alphaproteobacteria;o__Caulobacterales;f__Caulobacteraceae;g__Caulobacter	s__Caulobacter segnis
GCF_000092365.1	NC_014218.1	97.99	1986154	1986154	d__Bacteria;p__Actinobacteriota;c__Actinobacteria;o__Actinomycetales;f__Actinomycetaceae;g__Arcanobacterium	s__Arcanobacterium haemolyticum
GCF_000092405.1	NC_014220.1	98.81	2405559	2405559	d__Bacteria;p__Firmicutes_B;c__Syntrophomonadia;o__Syntrophomonadales;f__Syntrophothermaceae;g__Syntrophothermus	s__Syntrophothermus lipocalidus
GCF_000092425.1	NC_014221.1	97.88	3260398	3260398	d__Bacteria;p__Deinococcota;c__Deinococci;o__Deinococcales;f__Trueperaceae;g__Truepera	s__Truepera radiovictrix
GCF_000092505.1	NC_014136.1	100	2101787	2002721	d__Bacteria;p__Firmicutes;c__Bacilli;o__Lactobacillales;f__Lactobacillaceae;g__Leuconostoc	s__Leuconostoc kimchii
GCF_000092645.1	NC_014165.1	98.94	4189976	4189976	d__Bacteria;p__Actinobacteriota;c__Actinobacteria;o__Streptosporangiales;f__Streptosporangiaceae;g__Thermobispora	s__Thermobispora bispora
GCF_000092785.1	NC_014225.1	97.47	2131905	2116312	d__Bacteria;p__Verrucomicrobiota_A;c__Chlamydiia;o__Parachlamydiales;f__Waddliaceae;g__Waddlia	s__Waddlia chondrophila
GCF_000092825.1	NC_014168.1	96.73	3157527	3157527	d__Bacteria;p__Actinobacteriota;c__Actinobacteria;o__Mycobacteriales;f__Mycobacteriaceae;g__Segniliparus	s__Segniliparus rotundus
GCF_000092845.1	NC_014150.1	99.2	3241804	3241804	d__Bacteria;p__Spirochaetota;c__Brachyspirae;o__Brachyspirales;f__Brachyspiraceae;g__Brachyspira	s__Brachyspira murdochii
GCF_000092865.1	NC_014151.1	100	4123179	4123179	d__Bacteria;p__Actinobacteriota;c__Actinobacteria;o__Actinomycetales;f__Cellulomonadaceae;g__Cellulomonas	s__Cellulomonas flavigena
GCF_000092905.1	NC_014098.1	95.01	3384766	3384766	d__Bacteria;p__Firmicutes_K;c__Alicyclobacillia;o__Kyrpidiales;f__Kyrpidiaceae;g__Kyrpidia	s__Kyrpidia tusciae
GCF_000092925.1	NC_014217.1	100	4765023	4765023	d__Bacteria;p__Proteobacteria;c__Alphaproteobacteria;o__Rhizobiales;f__Xanthobacteraceae;g__Starkeya	s__Starkeya novella
GCF_000093025.1	NC_014207.1	99.57	3059871	3059871	d__Bacteria;p__Proteobacteria;c__Gammaproteobacteria;o__Burkholderiales;f__Methylophilaceae;g__Methylotenera	s__Methylotenera versatilis
GCF_000093085.1	NC_014219.1	99.34	3592487	3592487	d__Bacteria;p__Firmicutes;c__Bacilli;o__Bacillales;f__Salisediminibacteriaceae;g__Salisediminibacterium	s__Salisediminibacterium selenitireducens
GCF_000143085.1	NC_014315.1	100	3373286	3328570	d__Bacteria;p__Proteobacteria;c__Gammaproteobacteria;o__Nitrosococcales;f__Nitrosococcaceae;g__Nitrosococcus	s__Nitrosococcus watsonii
GCF_000143145.1	NC_014313.1	99.8	3638969	3638969	d__Bacteria;p__Proteobacteria;c__Alphaproteobacteria;o__Rhizobiales;f__Hyphomicrobiaceae;g__Hyphomicrobium	s__Hyphomicrobium denitrificans
GCF_000143165.1	NC_014314.1	97.36	1686510	1686510	d__Bacteria;p__Chloroflexota;c__Dehalococcoidia;o__Dehalococcoidales;f__Dehalococcoidaceae;g__Dehalogenimonas	s__Dehalogenimonas lykanthroporepellens
GCF_000143685.1	NC_014328.1	98.62	4630065	4630065	d__Bacteria;p__Firmicutes_A;c__Clostridia;o__Clostridiales;f__Clostridiaceae;g__Clostridium_B	s__Clostridium_B ljungdahlii
GCF_000143845.1	NC_014363.1	99.19	2051896	2051896	d__Bacteria;p__Actinobacteriota;c__Coriobacteriia;o__Coriobacteriales;f__Atopobiaceae;g__Olsenella	s__Olsenella uli
GCF_000143885.2	NC_018581.1	99.82	5885710	5441391	d__Bacteria;p__Actinobacteriota;c__Actinobacteria;o__Mycobacteriales;f__Mycobacteriaceae;g__Gordonia	s__Gordonia sp000143885
GCF_000143965.1	NC_014365.1	98.71	3655731	3655731	d__Bacteria;p__Desulfobacterota;c__Desulfarculia;o__Desulfarculales;f__Desulfarculaceae;g__Desulfarculus	s__Desulfarculus baarsii
GCF_000143985.1	NC_014364.1	96.48	4653970	4653970	d__Bacteria;p__Spirochaetota;c__Spirochaetia;o__Spirochaetales;f__Sediminispirochaetaceae;g__Sediminispirochaeta	s__Sediminispirochaeta smaragdinae
GCF_000144605.1	NC_014375.1	100	3445263	3445263	d__Bacteria;p__Proteobacteria;c__Alphaproteobacteria;o__Caulobacterales;f__Caulobacteraceae;g__Brevundimonas	s__Brevundimonas subvibrioides
GCF_000144625.1	NC_014376.1	99.37	4662871	4662871	d__Bacteria;p__Firmicutes_A;c__Clostridia;o__Lachnospirales;f__Lachnospiraceae;g__Hungatella	s__Hungatella saccharolyticum
GCF_000144645.1	NC_014377.1	95.19	2280035	2280035	d__Bacteria;p__Firmicutes_A;c__Thermovenabulia;o__Thermovenabulales;f__Thermovenabulaceae;g__Thermosediminibacter	s__Thermosediminibacter oceani
GCF_000144695.1	NC_014378.1	97.41	2469596	2469596	d__Bacteria;p__Firmicutes_F;c__Halanaerobiia;o__Halobacteroidales;f__Acetohalobiaceae;g__Acetohalobium	s__Acetohalobium arabaticum
GCF_000145215.1	NC_014392.1	99.52	2532343	2532343	d__Bacteria;p__Firmicutes_A;c__Thermoanaerobacteria;o__Caldicellulosiruptorales;f__Caldicellulosiruptoraceae;g__Caldicellulosiruptor	s__Caldicellulosiruptor obsidiansis
GCF_000145235.1	NC_014391.1	100	7025559	7025559	d__Bacteria;p__Actinobacteriota;c__Actinobacteria;o__Mycobacteriales;f__Micromonosporaceae;g__Micromonospora	s__Micromonospora aurantiaca
GCF_000145255.1	NC_014394.1	99.37	3162471	3162471	d__Bacteria;p__Proteobacteria;c__Gammaproteobacteria;o__Burkholderiales;f__Gallionellaceae;g__Gallionella	s__Gallionella capsiferriformans
GCF_000145275.1	NC_014393.1	98.83	5262222	5262222	d__Bacteria;p__Firmicutes_A;c__Clostridia;o__Clostridiales;f__Clostridiaceae;g__Clostridium_K	s__Clostridium_K cellulovorans
GCF_000145615.1	NC_014410.1	99.4	2785752	2785752	d__Bacteria;p__Firmicutes_A;c__Thermoanaerobacteria;o__Thermoanaerobacterales;f__Thermoanaerobacteraceae;g__Thermoanaerobacterium	s__Thermoanaerobacterium thermosaccharolyticum
GCF_000146065.2	NC_020449.1	100	2246820	2246820	d__Bacteria;p__Cloacimonadota;c__Cloacimonadia;o__Cloacimonadales;f__Cloacimonadaceae;g__Cloacimonas	s__Cloacimonas acidaminovorans
GCF_000146165.2	NC_004347.2	99.84	5131424	4969811	d__Bacteria;p__Proteobacteria;c__Gammaproteobacteria;o__Enterobacterales;f__Shewanellaceae;g__Shewanella	s__Shewanella oneidensis
GCF_000146185.1	NC_012778.1	98.66	2831389	2144190	d__Bacteria;p__Firmicutes_A;c__Clostridia;o__Lachnospirales;f__Lachnospiraceae;g__Lachnospira	s__Lachnospira eligens
GCF_000146505.1	NC_017448.1	100	3843004	3843004	d__Bacteria;p__Fibrobacterota;c__Fibrobacteria;o__Fibrobacterales;f__Fibrobacteraceae;g__Fibrobacter	s__Fibrobacter succinogenes
GCF_000147075.1	NC_014484.1	100	2472645	2472645	d__Bacteria;p__Spirochaetota;c__Spirochaetia;o__Spirochaetales;f__Spirochaetaceae_A;g__Spirochaeta_A	s__Spirochaeta_A thermophila_A
GCF_000147335.1	NC_014501.1	99.82	7841948	6091620	d__Bacteria;p__Cyanobacteria;c__Cyanobacteriia;o__Cyanobacteriales;f__Microcystaceae;g__Cyanothece_B	s__Cyanothece_B sp000147335
GCF_000147355.1	NC_014506.1	99.18	2153198	2153198	d__Bacteria;p__Campylobacterota;c__Campylobacteria;o__Campylobacterales;f__Sulfurimonadaceae;g__Sulfurimonas	s__Sulfurimonas autotrophica
GCF_000147695.2	NC_015958.1	99.52	2785056	2785056	d__Bacteria;p__Firmicutes_A;c__Thermoanaerobacteria;o__Thermoanaerobacterales;f__Thermoanaerobacteraceae;g__Thermoanaerobacter	s__Thermoanaerobacter wiegelii
GCF_000147715.2	NC_017934.1	98.12	2975953	2974229	d__Bacteria;p__Thermotogota;c__Thermotogae;o__Petrotogales;f__Kosmotogaceae;g__Mesotoga	s__Mesotoga prima
GCF_000147815.2	NC_015957.1	100	11138313	10657107	d__Bacteria;p__Actinobacteriota;c__Actinobacteria;o__Streptomycetales;f__Streptomycetaceae;g__Streptomyces	s__Streptomyces violaceusniger
GCF_000148645.1	NC_014541.1	100	4279159	4279159	d__Bacteria;p__Proteobacteria;c__Gammaproteobacteria;o__Enterobacterales;f__Shewanellaceae;g__Ferrimonas	s__Ferrimonas balearica
GCF_000148935.1	NC_014562.1	99.87	4888338	4024986	d__Bacteria;p__Proteobacteria;c__Gammaproteobacteria;o__Enterobacterales;f__Enterobacteriaceae;g__Pantoea	s__Pantoea vagans_B
GCF_000152825.2	NC_014414.1	97.23	2902643	2902643	d__Bacteria;p__Proteobacteria;c__Alphaproteobacteria;o__Caulobacterales;f__Parvularculaceae;g__Parvularcula	s__Parvularcula bermudensis
GCF_000152945.2	NC_020830.1	99.61	2961474	2961474	d__Bacteria;p__Bacteroidota;c__Bacteroidia;o__Flavobacteriales;f__Flavobacteriaceae;g__Polaribacter	s__Polaribacter sp000152945
GCF_000153165.2	NC_014472.1	99.5	3868304	3868304	d__Bacteria;p__Bacteroidota;c__Bacteroidia;o__Flavobacteriales;f__Flavobacteriaceae;g__Maribacter_A	s__Maribacter_A sp000153165
GCF_000153405.2	NC_020802.1	100	3052410	3052410	d__Bacteria;p__Proteobacteria;c__Gammaproteobacteria;o__Enterobacterales;f__Psychromonadaceae;g__Psychromonas	s__Psychromonas sp000153405
GCF_000153485.2	NC_018721.1	98.73	4321832	4321832	d__Bacteria;p__Bacteroidota;c__Bacteroidia;o__Flavobacteriales;f__Flavobacteriaceae;g__Psychroflexus	s__Psychroflexus torquis
GCF_000154785.2	NC_015730.1	99.25	4745450	4505211	d__Bacteria;p__Proteobacteria;c__Alphaproteobacteria;o__Rhodobacterales;f__Rhodobacteraceae;g__Roseobacter	s__Roseobacter litoralis
GCF_000155675.2	NC_020911.1	99.39	4875481	4812600	d__Bacteria;p__Proteobacteria;c__Alphaproteobacteria;o__Rhodobacterales;f__Rhodobacteraceae;g__Octadecabacter	s__Octadecabacter antarcticus
GCF_000155735.2	NC_020908.1	99.29	5478249	5200279	d__Bacteria;p__Proteobacteria;c__Alphaproteobacteria;o__Rhodobacterales;f__Rhodobacteraceae;g__Octadecabacter	s__Octadecabacter arcticus
GCF_000157895.3	NC_022663.1	99.94	6577228	6432277	d__Bacteria;p__Actinobacteriota;c__Actinobacteria;o__Mycobacteriales;f__Mycobacteriaceae;g__Mycobacterium	s__Mycobacterium kansasii
GCF_000158275.2	NZ_CP007062.1	100	2514029	2507720	d__Bacteria;p__Fusobacteriota;c__Fusobacteriia;o__Fusobacteriales;f__Fusobacteriaceae;g__Fusobacterium	s__Fusobacterium animalis
GCF_000161795.2	NZ_CP006882.1	99.46	2111515	2111515	d__Bacteria;p__Cyanobacteria;c__Cyanobacteriia;o__Synechococcales;f__Cyanobiaceae;g__Synechococcus_C	s__Synechococcus_C sp000161795
GCF_000163055.2	NC_022124.1	98.99	2480269	709850	d__Bacteria;p__Bacteroidota;c__Bacteroidia;o__Bacteroidales;f__Bacteroidaceae;g__Prevotella	s__Prevotella sp000163055
GCF_000163895.2	NC_016630.1	97.9	1931012	1931012	d__Bacteria;p__Firmicutes_A;c__Clostridia;o__Peptostreptococcales;f__Filifactoraceae;g__Filifactor	s__Filifactor alocis
GCF_000164675.2	NC_015678.1	99.89	2153652	2153652	d__Bacteria;p__Firmicutes;c__Bacilli;o__Lactobacillales;f__Streptococcaceae;g__Streptococcus	s__Streptococcus parasanguinis
GCF_000164695.2	NC_014643.1	99.34	2506025	2506025	d__Bacteria;p__Actinobacteriota;c__Actinobacteria;o__Actinomycetales;f__Micrococcaceae;g__Rothia	s__Rothia dentocariosa
GCF_000164865.1	NC_014618.1	99.05	4814049	4814049	d__Bacteria;p__Proteobacteria;c__Gammaproteobacteria;o__Enterobacterales;f__Enterobacteriaceae;g__Enterobacter_B	s__Enterobacter_B lignolyticus
GCF_000165465.1	NC_017455.1	100	2309262	2309262	d__Bacteria;p__Firmicutes_F;c__Halanaerobiia;o__Halanaerobiales;f__Halanaerobiaceae;g__Halanaerobium	s__Halanaerobium praevalens
GCF_000165485.1	NC_014623.1	100	10260756	10260756	d__Bacteria;p__Myxococcota;c__Myxococcia;o__Myxococcales;f__Myxococcaceae;g__Stigmatella	s__Stigmatella aurantiaca_A
GCF_000165505.1	NC_014632.1	100	3132314	2046464	d__Bacteria;p__Fusobacteriota;c__Fusobacteriia;o__Fusobacteriales;f__Fusobacteriaceae;g__Ilyobacter	s__Ilyobacter polytropus
GCF_000165715.2	NC_015174.1	95.56	6006602	6006602	d__Bacteria;p__Planctomycetota;c__Planctomycetes;o__Planctomycetales;f__Planctomycetaceae;g__Rubinisphaera	s__Rubinisphaera brasiliensis
GCF_000165835.1	NC_014640.1	99.53	7359146	7013095	d__Bacteria;p__Proteobacteria;c__Gammaproteobacteria;o__Burkholderiales;f__Burkholderiaceae;g__Achromobacter	s__Achromobacter xylosoxidans_B
GCF_000166055.1	NC_014664.1	97.77	4014469	4014469	d__Bacteria;p__Proteobacteria;c__Alphaproteobacteria;o__Rhizobiales;f__Rhodomicrobiaceae;g__Rhodomicrobium	s__Rhodomicrobium vannielii
GCF_000166135.1	NC_014666.1	100	8815781	8815781	d__Bacteria;p__Actinobacteriota;c__Actinobacteria;o__Frankiales;f__Frankiaceae;g__Frankia	s__Frankia inefficax
GCF_000166335.1	NC_014657.1	99.52	2428903	2428903	d__Bacteria;p__Firmicutes_A;c__Thermoanaerobacteria;o__Caldicellulosiruptorales;f__Caldicellulosiruptoraceae;g__Caldicellulosiruptor	s__Caldicellulosiruptor owensensis
GCF_000166355.1	NC_014652.1	99.52	2770676	2770676	d__Bacteria;p__Firmicutes_A;c__Thermoanaerobacteria;o__Caldicellulosiruptorales;f__Caldicellulosiruptoraceae;g__Caldicellulosiruptor	s__Caldicellulosiruptor hydrothermalis
GCF_000166395.1	NC_014655.1	98.96	4059653	4059653	d__Bacteria;p__Bacteroidota;c__Bacteroidia;o__Cytophagales;f__Spirosomaceae;g__Leadbetterella	s__Leadbetterella byssophila
GCF_000166415.1	NC_014654.1	99.13	2613117	2613117	d__Bacteria;p__Firmicutes_F;c__Halanaerobiia;o__Halanaerobiales;f__Halanaerobiaceae;g__Halanaerobium	s__Halanaerobium hydrogeniformans
GCF_000166775.1	NC_014720.1	99.52	2843785	2843785	d__Bacteria;p__Firmicutes_A;c__Thermoanaerobacteria;o__Caldicellulosiruptorales;f__Caldicellulosiruptoraceae;g__Caldicellulosiruptor	s__Caldicellulosiruptor kronotskyensis
GCF_000169195.2	NC_016023.1	100	3552226	3552226	d__Bacteria;p__Firmicutes;c__Bacilli;o__Bacillales;f__Bacillaceae_C;g__Bacillus_E	s__Bacillus_E coagulans_A
GCF_000172635.2	NC_018632.1	99.66	4653851	4653851	d__Bacteria;p__Proteobacteria;c__Gammaproteobacteria;o__Enterobacterales;f__Alteromonadaceae;g__Alteromonas	s__Alteromonas macleodii
GCF_000172795.2	NZ_CP020947.1	100	6657947	4426159	d__Bacteria;p__Proteobacteria;c__Alphaproteobacteria;o__Rhizobiales;f__Rhizobiaceae;g__Rhizobium	s__Rhizobium sp000172795
GCF_000175095.2	NC_015222.1	99.84	3337023	3180526	d__Bacteria;p__Proteobacteria;c__Gammaproteobacteria;o__Burkholderiales;f__Nitrosomonadaceae;g__Nitrosomonas	s__Nitrosomonas sp000175095
GCF_000175115.2	NC_014973.1	100	5277406	5277406	d__Bacteria;p__Desulfuromonadota;c__Desulfuromonadia;o__Geobacterales;f__Geobacteraceae;g__Geobacter_A	s__Geobacter_A sp000175115
GCF_000175255.2	NC_017262.1	100	2143461	2021773	d__Bacteria;p__Proteobacteria;c__Alphaproteobacteria;o__Sphingomonadales;f__Sphingomonadaceae;g__Zymomonas	s__Zymomonas mobilis
GCF_000175575.2	NZ_CP005986.1	99.38	2987045	2777717	d__Bacteria;p__Proteobacteria;c__Gammaproteobacteria;o__Acidithiobacillales;f__Acidithiobacillaceae;g__Acidithiobacillus	s__Acidithiobacillus caldus
GCF_000175935.2	NC_014837.1	100	6312783	4368708	d__Bacteria;p__Proteobacteria;c__Gammaproteobacteria;o__Enterobacterales;f__Enterobacteriaceae;g__Pantoea	s__Pantoea sp000175935
GCF_000176035.2	NC_015675.1	99.92	6884444	6884444	d__Bacteria;p__Proteobacteria;c__Alphaproteobacteria;o__Rhizobiales;f__Rhizobiaceae;g__Mesorhizobium	s__Mesorhizobium opportunistum
GCF_000176855.2	NC_015138.1	99.81	5482170	5482170	d__Bacteria;p__Proteobacteria;c__Gammaproteobacteria;o__Burkholderiales;f__Burkholderiaceae;g__Acidovorax_A	s__Acidovorax_A avenae
GCF_000176915.2	NC_014844.1	99.41	3629109	3629109	d__Bacteria;p__Desulfobacterota_A;c__Desulfovibrionia;o__Desulfovibrionales;f__Desulfovibrionaceae;g__Pseudodesulfovibrio	s__Pseudodesulfovibrio aespoeensis
GCF_000177195.2	NC_015953.1	99.93	7414440	7414440	d__Bacteria;p__Actinobacteriota;c__Actinobacteria;o__Streptomycetales;f__Streptomycetaceae;g__Streptomyces	s__Streptomyces sp000177195
GCF_000177235.2	NC_014829.1	99.01	4681672	4681672	d__Bacteria;p__Firmicutes;c__Bacilli;o__Bacillales;f__Salisediminibacteriaceae;g__Bacillus_AR	s__Bacillus_AR cellulosilyticus
GCF_000177255.2	NC_014834.1	99.89	5404117	5404117	d__Bacteria;p__Proteobacteria;c__Alphaproteobacteria;o__Rhizobiales;f__Xanthobacteraceae;g__Rhodopseudomonas	s__Rhodopseudomonas palustris_G
GCF_000177535.2	NC_015673.1	99.32	2601311	2601311	d__Bacteria;p__Actinobacteriota;c__Actinobacteria;o__Mycobacteriales;f__Mycobacteriaceae;g__Corynebacterium	s__Corynebacterium resistens
GCF_000177635.2	NC_014836.1	94.77	2928377	2928377	d__Bacteria;p__Chrysiogenetota;c__Chrysiogenetes;o__Chrysiogenales;f__Chrysiogenaceae;g__Desulfurispirillum	s__Desulfurispirillum indicum
GCF_000178115.2	NC_014828.1	97.32	3008576	3008576	d__Bacteria;p__Firmicutes_A;c__Clostridia;o__Oscillospirales;f__Ethanoligenenaceae;g__Ethanoligenens	s__Ethanoligenens harbinense
GCF_000178495.2	NZ_CP029003.1	99.8	2318649	2318649	d__Bacteria;p__Proteobacteria;c__Gammaproteobacteria;o__Enterobacterales;f__Pasteurellaceae;g__Actinobacillus	s__Actinobacillus pleuropneumoniae
GCF_000178835.2	NC_015275.1	97.99	4714237	4714237	d__Bacteria;p__Firmicutes_A;c__Clostridia;o__Lachnospirales;f__Cellulosilyticaceae;g__Cellulosilyticum	s__Cellulosilyticum lentocellum
GCF_000178875.2	NC_016901.1	99.84	5368767	5288069	d__Bacteria;p__Proteobacteria;c__Gammaproteobacteria;o__Enterobacterales;f__Shewanellaceae;g__Shewanella	s__Shewanella baltica
GCF_000178955.2	NC_016631.1	99.14	6237577	6237577	d__Bacteria;p__Acidobacteriota;c__Acidobacteriae;o__Acidobacteriales;f__Acidobacteriaceae;g__Granulicella_A	s__Granulicella_A mallensis
GCF_000178975.2	NC_015064.1	99.15	5503984	4309153	d__Bacteria;p__Acidobacteriota;c__Acidobacteriae;o__Acidobacteriales;f__Acidobacteriaceae;g__Granulicella	s__Granulicella tundricola
GCF_000179035.2	NC_015155.1	67.26	742431	742431	d__Bacteria;p__Firmicutes;c__Bacilli;o__Mycoplasmatales;f__Mycoplasmoidaceae;g__Eperythrozoon_A	s__Eperythrozoon_A suis
GCF_000179395.2	NC_015859.1	98.87	3433007	3433007	d__Bacteria;p__Actinobacteriota;c__Actinobacteria;o__Mycobacteriales;f__Mycobacteriaceae;g__Corynebacterium	s__Corynebacterium variabile
GCF_000179635.2	NC_014833.1	99.32	4482087	3685408	d__Bacteria;p__Firmicutes_A;c__Clostridia;o__Oscillospirales;f__Ruminococcaceae;g__Ruminococcus_D	s__Ruminococcus_D albus
GCF_000179915.2	NC_014963.1	100	5095226	5095226	d__Bacteria;p__Acidobacteriota;c__Acidobacteriae;o__Acidobacteriales;f__Acidobacteriaceae;g__Terriglobus	s__Terriglobus saanensis
GCF_000182745.2	NC_016027.1	99.5	3513191	3136818	d__Bacteria;p__Proteobacteria;c__Alphaproteobacteria;o__Acetobacterales;f__Acetobacteraceae;g__Komagataeibacter	s__Komagataeibacter medellinensis
GCF_000183135.1	NC_014734.1	100	3685504	3685504	d__Bacteria;p__Bacteroidota;c__Bacteroidia;o__Bacteroidales;f__Paludibacteraceae;g__Paludibacter	s__Paludibacter propionicigenes
GCF_000183365.1	NC_014751.1	99.62	1008951	1008951	d__Bacteria;p__Firmicutes;c__Bacilli;o__Mycoplasmatales;f__Mycoplasmataceae;g__Mycoplasma	s__Mycoplasma leachii
GCF_000183385.1	NC_014760.1	100	1003404	1003404	d__Bacteria;p__Firmicutes;c__Bacilli;o__Mycoplasmatales;f__Metamycoplasmataceae;g__Mycoplasmopsis	s__Mycoplasmopsis bovis
GCF_000183405.1	NC_014758.1	99.07	2216552	2157835	d__Bacteria;p__Deferribacterota;c__Deferribacteres;o__Deferribacterales;f__Calditerrivibrionaceae;g__Calditerrivibrio	s__Calditerrivibrio nitroreducens
GCF_000183425.1	NC_014759.1	100	4516490	4511574	d__Bacteria;p__Bacteroidota;c__Bacteroidia;o__Cytophagales;f__Cyclobacteriaceae;g__Marivirga	s__Marivirga tractuosa
GCF_000183665.1	NC_014774.1	98.56	1258278	1258278	d__Bacteria;p__Proteobacteria;c__Alphaproteobacteria;o__Rhizobiales;f__Rhizobiaceae_A;g__Liberibacter	s__Liberibacter solanacearum
GCF_000183725.1	NC_014762.1	99.59	2819357	2574824	d__Bacteria;p__Campylobacterota;c__Campylobacteria;o__Campylobacterales;f__Sulfurimonadaceae;g__Sulfuricurvum	s__Sulfuricurvum kujiense
GCF_000183745.1	NC_014761.1	98.72	2439291	2303940	d__Bacteria;p__Deinococcota;c__Deinococci;o__Deinococcales;f__Marinithermaceae;g__Oceanithermus	s__Oceanithermus profundus
GCF_000184345.1	NC_017583.1	100	2560222	2560222	d__Bacteria;p__Spirochaetota;c__Spirochaetia;o__Spirochaetales;f__Spirochaetaceae_A;g__Spirochaeta_A	s__Spirochaeta_A thermophila
GCF_000184435.1	NC_014814.1	99.81	5783292	5547747	d__Bacteria;p__Actinobacteriota;c__Actinobacteria;o__Mycobacteriales;f__Mycobacteriaceae;g__Mycolicibacterium	s__Mycolicibacterium gilvum
GCF_000184685.1	NC_014830.1	100	4024382	4024382	d__Bacteria;p__Actinobacteriota;c__Actinobacteria;o__Actinomycetales;f__Dermatophilaceae;g__Intrasporangium	s__Intrasporangium calvum
GCF_000184705.1	NC_014831.1	100	2844696	2844696	d__Bacteria;p__Firmicutes_E;c__Thermaerobacteria;o__Thermaerobacterales;f__Thermaerobacteraceae;g__Thermaerobacter	s__Thermaerobacter marianensis
GCF_000184745.1	NC_014931.1	100	6550056	6550056	d__Bacteria;p__Proteobacteria;c__Gammaproteobacteria;o__Burkholderiales;f__Burkholderiaceae;g__Variovorax	s__Variovorax paradoxus_C
GCF_000185805.1	NC_014926.1	99.58	1759526	1682965	d__Bacteria;p__Aquificota;c__Desulfurobacteriia;o__Desulfurobacteriales;f__Desulfurobacteriaceae;g__Thermovibrio	s__Thermovibrio ammonificans
GCF_000185905.1	NC_014923.1	99.51	6690028	6264489	d__Bacteria;p__Proteobacteria;c__Alphaproteobacteria;o__Rhizobiales;f__Rhizobiaceae;g__Mesorhizobium	s__Mesorhizobium ciceri_D
GCF_000185965.1	NC_014924.1	99.66	3419049	3419049	d__Bacteria;p__Proteobacteria;c__Gammaproteobacteria;o__Xanthomonadales;f__Xanthomonadaceae;g__Pseudoxanthomonas	s__Pseudoxanthomonas suwonensis_A
GCF_000185985.2	NC_014909.2	96.34	722585	722585	d__Bacteria;p__Proteobacteria;c__Gammaproteobacteria;o__Enterobacterales;f__Enterobacteriaceae;g__Blochmannia	s__Blochmannia vafer
GCF_000186225.1	NC_014933.1	99.26	3998906	3998906	d__Bacteria;p__Bacteroidota;c__Bacteroidia;o__Bacteroidales;f__Bacteroidaceae;g__Bacteroides	s__Bacteroides helcogenes
GCF_000186245.1	NC_014935.1	99.18	2101285	2101285	d__Bacteria;p__Campylobacterota;c__Campylobacteria;o__Campylobacterales;f__Sulfurovaceae;g__Nitratifractor	s__Nitratifractor salsuginis
GCF_000186265.1	NC_014934.1	99.67	4888353	4888353	d__Bacteria;p__Bacteroidota;c__Bacteroidia;o__Flavobacteriales;f__Flavobacteriaceae;g__Cellulophaga	s__Cellulophaga algicola
GCF_000186345.1	NC_014962.1	98.45	5529304	5472964	d__Bacteria;p__Planctomycetota;c__Planctomycetes;o__Isosphaerales;f__Isosphaeraceae;g__Isosphaera	s__Isosphaera pallida
GCF_000186385.1	NC_014958.1	97.35	3498530	3498530	d__Bacteria;p__Deinococcota;c__Deinococci;o__Deinococcales;f__Deinococcaceae;g__Deinococcus_B	s__Deinococcus_B maricopensis
GCF_000189295.2	NC_016803.1	100	3858580	3858580	d__Bacteria;p__Desulfobacterota_A;c__Desulfovibrionia;o__Desulfovibrionales;f__Desulfovibrionaceae;g__Pseudodesulfovibrio	s__Pseudodesulfovibrio desulfuricans
GCF_000189415.1	NC_015144.1	100	2272954	2272954	d__Bacteria;p__Bacteroidota;c__Bacteroidia;o__Flavobacteriales;f__Weeksellaceae;g__Weeksella	s__Weeksella virosa
GCF_000189535.1	NC_015145.1	99.64	4535320	4250414	d__Bacteria;p__Actinobacteriota;c__Actinobacteria;o__Actinomycetales;f__Micrococcaceae;g__Pseudarthrobacter	s__Pseudarthrobacter phenanthrenivorans
GCF_000189775.2	NC_015555.1	99.52	2534358	2534358	d__Bacteria;p__Firmicutes_A;c__Thermoanaerobacteria;o__Thermoanaerobacterales;f__Thermoanaerobacteraceae;g__Thermoanaerobacterium	s__Thermoanaerobacterium xylanolyticum
GCF_000190435.1	NC_015152.1	97.73	3316466	3316466	d__Bacteria;p__Spirochaetota;c__Spirochaetia;o__Sphaerochaetales;f__Sphaerochaetaceae;g__Sphaerochaeta	s__Sphaerochaeta globosa
GCF_000190535.1	NC_015160.1	99.46	4392288	4392288	d__Bacteria;p__Bacteroidota;c__Bacteroidia;o__Bacteroidales;f__Marinifilaceae;g__Odoribacter	s__Odoribacter splanchnicus
GCF_000190555.1	NC_015161.1	96.61	2886836	2147060	d__Bacteria;p__Deinococcota;c__Deinococci;o__Deinococcales;f__Deinococcaceae;g__Deinococcus	s__Deinococcus proteolyticus
GCF_000190575.1	NC_015164.1	98.41	4308663	4242803	d__Bacteria;p__Bacteroidota;c__Bacteroidia;o__Bacteroidales;f__Bacteroidaceae;g__Bacteroides_A	s__Bacteroides_A salanitronis
GCF_000190595.1	NC_015167.1	99.67	3765936	3765936	d__Bacteria;p__Bacteroidota;c__Bacteroidia;o__Flavobacteriales;f__Flavobacteriaceae;g__Cellulophaga	s__Cellulophaga lytica
GCF_000190635.1	NC_015172.1	100	3406739	3406739	d__Bacteria;p__Firmicutes_B;c__Desulfitobacteriia;o__Desulfitobacteriales;f__Syntrophobotulaceae;g__Syntrophobotulus	s__Syntrophobotulus glycolicus
GCF_000190735.1	NC_015177.1	100	4635236	4635236	d__Bacteria;p__Bacteroidota;c__Bacteroidia;o__Sphingobacteriales;f__Sphingobacteriaceae;g__Pseudopedobacter	s__Pseudopedobacter saltans
GCF_000191045.1	NC_015185.1	99.16	1541968	1541968	d__Bacteria;p__Aquificota;c__Desulfurobacteriia;o__Desulfurobacteriales;f__Desulfurobacteriaceae;g__Desulfurobacterium	s__Desulfurobacterium thermolithotrophum
GCF_000192635.1	NC_015183.1	99.98	5573770	2823930	d__Bacteria;p__Proteobacteria;c__Alphaproteobacteria;o__Rhizobiales;f__Rhizobiaceae;g__Agrobacterium	s__Agrobacterium sp000192635
GCF_000192745.1	NC_015259.1	100	4718963	4649365	d__Bacteria;p__Proteobacteria;c__Alphaproteobacteria;o__Rhizobiales;f__Stappiaceae;g__Polymorphum	s__Polymorphum gilvum
GCF_000192845.1	NC_015277.1	100	6226409	6226409	d__Bacteria;p__Bacteroidota;c__Bacteroidia;o__Sphingobacteriales;f__Sphingobacteriaceae;g__Pseudosphingobacterium	s__Pseudosphingobacterium sp000192845
GCF_000192865.1	NC_015276.1	99.89	4684316	4684316	d__Bacteria;p__Proteobacteria;c__Gammaproteobacteria;o__Pseudomonadales;f__Marinomonadaceae;g__Marinomonas	s__Marinomonas mediterranea
GCF_000193205.1	NC_015278.1	99.04	2080974	2080974	d__Bacteria;p__Firmicutes;c__Bacilli;o__Lactobacillales;f__Aerococcaceae;g__Aerococcus	s__Aerococcus urinae_A
GCF_000193435.2	NC_015949.1	98.96	2674809	2674809	d__Bacteria;p__Firmicutes_A;c__Thermoanaerobacteria;o__Caldicellulosiruptorales;f__Caldicellulosiruptoraceae;g__Caldicellulosiruptor	s__Caldicellulosiruptor lactoaceticus
GCF_000194135.1	NC_015318.1	99.59	1694430	1694430	d__Bacteria;p__Campylobacterota;c__Desulfurellia;o__Desulfurellales;f__Hippeaceae;g__Hippea	s__Hippea maritima
GCF_000194605.1	NC_015321.1	100	4633577	4633577	d__Bacteria;p__Bacteroidota;c__Bacteroidia;o__Flavobacteriales;f__Crocinitomicaceae;g__Fluviicola	s__Fluviicola taffensis
GCF_000194805.1	NC_015379.1	100	6843248	6843248	d__Bacteria;p__Proteobacteria;c__Gammaproteobacteria;o__Pseudomonadales;f__Pseudomonadaceae;g__Pseudomonas_E	s__Pseudomonas_E brassicacearum_C
GCF_000195085.1	NC_015380.1	98.81	1284727	1284727	d__Bacteria;p__Proteobacteria;c__Alphaproteobacteria;o__Pelagibacterales;f__Pelagibacteraceae;g__IMCC9063	s__IMCC9063 sp000195085
GCF_000195275.1	NC_015385.1	100	2897425	2731853	d__Bacteria;p__Spirochaetota;c__Spirochaetia;o__Treponematales;f__Treponemataceae;g__Treponema_D	s__Treponema_D succinifaciens
GCF_000195295.1	NC_015388.1	98.06	3282536	3282536	d__Bacteria;p__Desulfobacterota;c__Desulfobaccia;o__Desulfobaccales;f__Desulfobaccaceae;g__Desulfobacca	s__Desulfobacca acetoxidans
GCF_000195315.1	NC_015389.1	100	2115681	2115681	d__Bacteria;p__Actinobacteriota;c__Coriobacteriia;o__Coriobacteriales;f__Coriobacteriaceae;g__Coriobacterium	s__Coriobacterium glomerans
GCF_000195335.1	NC_015387.1	99.15	2269167	2269167	d__Bacteria;p__Deinococcota;c__Deinococci;o__Deinococcales;f__Marinithermaceae;g__Marinithermus	s__Marinithermus hydrothermalis
GCF_000195575.1	NC_015391.1	98.91	2685399	2635294	d__Bacteria;p__Firmicutes;c__Bacilli;o__Lactobacillales;f__Carnobacteriaceae;g__Carnobacterium_A	s__Carnobacterium_A sp000195575
GCF_000195755.1	NC_002937.3	99.41	3773159	3570858	d__Bacteria;p__Desulfobacterota_A;c__Desulfovibrionia;o__Desulfovibrionales;f__Desulfovibrionaceae;g__Desulfovibrio_A	s__Desulfovibrio_A vulgaris
GCF_000195775.1	NC_005296.1	99.89	5467640	5459213	d__Bacteria;p__Proteobacteria;c__Alphaproteobacteria;o__Rhizobiales;f__Xanthobacteraceae;g__Rhodopseudomonas	s__Rhodopseudomonas palustris_F
GCF_000195795.1	NC_003212.1	99.45	3093113	3011208	d__Bacteria;p__Firmicutes;c__Bacilli;o__Lactobacillales;f__Listeriaceae;g__Listeria	s__Listeria innocua
GCF_000195855.1	NC_002677.1	87.88	3268203	3268203	d__Bacteria;p__Actinobacteriota;c__Actinobacteria;o__Mycobacteriales;f__Mycobacteriaceae;g__Mycobacterium	s__Mycobacterium leprae
GCF_000195875.1	NC_002771.1	100	963879	963879	d__Bacteria;p__Firmicutes;c__Bacilli;o__Mycoplasmatales;f__Metamycoplasmataceae;g__Mycoplasmopsis_B	s__Mycoplasmopsis_B pulmonis
GCF_000195955.2	NC_000962.3	99.94	4411532	4411532	d__Bacteria;p__Actinobacteriota;c__Actinobacteria;o__Mycobacteriales;f__Mycobacteriaceae;g__Mycobacterium	s__Mycobacterium tuberculosis
GCF_000195975.1	NC_005070.1	99.46	2434428	2434428	d__Bacteria;p__Cyanobacteria;c__Cyanobacteriia;o__Synechococcales;f__Cyanobiaceae;g__Synechococcus_C	s__Synechococcus_C sp000195975
GCF_000196015.1	NC_007973.1	99.94	6913352	3928089	d__Bacteria;p__Proteobacteria;c__Gammaproteobacteria;o__Burkholderiales;f__Burkholderiaceae;g__Cupriavidus	s__Cupriavidus metallidurans
GCF_000196115.1	NC_005027.1	99.93	7145576	7145576	d__Bacteria;p__Planctomycetota;c__Planctomycetes;o__Pirellulales;f__Pirellulaceae;g__Rhodopirellula	s__Rhodopirellula baltica
GCF_000196135.1	NC_005090.1	99.41	2110355	2110355	d__Bacteria;p__Campylobacterota;c__Campylobacteria;o__Campylobacterales;f__Helicobacteraceae;g__Wolinella	s__Wolinella succinogenes
GCF_000196155.1	NC_005126.1	100	5688987	5688987	d__Bacteria;p__Proteobacteria;c__Gammaproteobacteria;o__Enterobacterales;f__Enterobacteriaceae;g__Photorhabdus	s__Photorhabdus laumondii
GCF_000196175.1	NC_005363.1	97.75	3782950	3782950	d__Bacteria;p__Bdellovibrionota;c__Bdellovibrionia;o__Bdellovibrionales;f__Bdellovibrionaceae;g__Bdellovibrio	s__Bdellovibrio bacteriovorus
GCF_000196235.1	NC_008541.1	99.71	5070478	4698945	d__Bacteria;p__Actinobacteriota;c__Actinobacteria;o__Actinomycetales;f__Micrococcaceae;g__Leaf337	s__Leaf337 sp000196235
GCF_000196275.1	NC_008025.1	99.58	3247018	2467205	d__Bacteria;p__Deinococcota;c__Deinococci;o__Deinococcales;f__Deinococcaceae;g__Deinococcus	s__Deinococcus geothermalis
GCF_000196315.1	NC_014230.1	99.62	2952962	2952962	d__Bacteria;p__Bacteroidota;c__Bacteroidia;o__Flavobacteriales;f__Flavobacteriaceae;g__Croceibacter	s__Croceibacter atlanticus
GCF_000196355.1	NC_007614.1	99.52	3234309	3184243	d__Bacteria;p__Proteobacteria;c__Gammaproteobacteria;o__Burkholderiales;f__Nitrosomonadaceae;g__Nitrosospira	s__Nitrosospira multiformis
GCF_000196435.1	NC_010161.1	100	2642404	2619061	d__Bacteria;p__Proteobacteria;c__Alphaproteobacteria;o__Rhizobiales;f__Rhizobiaceae;g__Bartonella	s__Bartonella tribocorum
GCF_000196455.1	NC_014614.1	98.46	2715461	2715461	d__Bacteria;p__Firmicutes_A;c__Clostridia;o__Peptostreptococcales;f__Filifactoraceae;g__Acetoanaerobium	s__Acetoanaerobium sticklandii
GCF_000196475.1	NC_012962.1	100	5094138	5064808	d__Bacteria;p__Proteobacteria;c__Gammaproteobacteria;o__Enterobacterales;f__Enterobacteriaceae;g__Photorhabdus	s__Photorhabdus asymbiotica
GCF_000196515.1	NC_014248.1	98.89	5486145	5354700	d__Bacteria;p__Cyanobacteria;c__Cyanobacteriia;o__Cyanobacteriales;f__Nostocaceae;g__Trichormus_B	s__Trichormus_B azollae
GCF_000196555.1	NC_015067.1	100	2385164	2385164	d__Bacteria;p__Actinobacteriota;c__Actinobacteria;o__Actinomycetales;f__Bifidobacteriaceae;g__Bifidobacterium	s__Bifidobacterium longum
GCF_000196615.1	NC_014306.1	100	5372268	5100167	d__Bacteria;p__Proteobacteria;c__Gammaproteobacteria;o__Enterobacterales;f__Enterobacteriaceae;g__Erwinia	s__Erwinia billingiae
GCF_000196675.1	NC_015312.1	99.73	7303989	7096571	d__Bacteria;p__Actinobacteriota;c__Actinobacteria;o__Mycobacteriales;f__Pseudonocardiaceae;g__Pseudonocardia	s__Pseudonocardia dioxanivorans
GCF_000196735.1	NC_014551.1	99.3	3980199	3980199	d__Bacteria;p__Firmicutes;c__Bacilli;o__Bacillales;f__Bacillaceae;g__Bacillus	s__Bacillus amyloliquefaciens
GCF_000196795.1	NC_014259.1	100	4152543	4152543	d__Bacteria;p__Proteobacteria;c__Gammaproteobacteria;o__Pseudomonadales;f__Moraxellaceae;g__Acinetobacter	s__Acinetobacter oleivorans
GCF_000196815.1	NC_014355.1	97.67	4317083	4317083	d__Bacteria;p__Nitrospirota;c__Nitrospiria;o__Nitrospirales;f__Nitrospiraceae;g__Nitrospira_A	s__Nitrospira_A defluvii
GCF_000196875.2	NC_014532.2	99.86	4061825	4061825	d__Bacteria;p__Proteobacteria;c__Gammaproteobacteria;o__Pseudomonadales;f__Halomonadaceae;g__Halomonas	s__Halomonas elongata
GCF_000197735.1	NC_014550.1	99.74	3918192	3859257	d__Bacteria;p__Actinobacteriota;c__Actinobacteria;o__Actinomycetales;f__Micrococcaceae;g__Glutamicibacter	s__Glutamicibacter arilaitensis
GCF_000198515.1	NC_014366.1	97.41	4587455	4587455	d__Bacteria;p__Proteobacteria;c__Gammaproteobacteria;o__Pseudomonadales;f__Ketobacteraceae;g__HdN1	s__HdN1 sp000198515
GCF_000198775.1	NC_014722.1	97.95	3750138	2755309	d__Bacteria;p__Proteobacteria;c__Gammaproteobacteria;o__Burkholderiales;f__Burkholderiaceae;g__Paraburkholderia_C	s__Paraburkholderia_C rhizoxinica
GCF_000199675.1	NC_014960.1	93.64	3532378	3532378	d__Bacteria;p__Chloroflexota;c__Anaerolineae;o__Anaerolineales;f__Anaerolineaceae;g__Anaerolinea	s__Anaerolinea thermophila
GCF_000200595.1	NC_014810.2	99.44	1672681	1672681	d__Bacteria;p__Campylobacterota;c__Campylobacteria;o__Campylobacterales;f__Helicobacteraceae;g__Helicobacter_E	s__Helicobacter_E felis
GCF_000200735.1	NC_014970.1	76.42	1147259	1147259	d__Bacteria;p__Firmicutes;c__Bacilli;o__Mycoplasmatales;f__Mycoplasmoidaceae;g__Eperythrozoon_B	s__Eperythrozoon_B haemofelis
GCF_000202635.1	NC_015125.1	99.49	3982034	3982034	d__Bacteria;p__Actinobacteriota;c__Actinobacteria;o__Actinomycetales;f__Microbacteriaceae;g__Microbacterium	s__Microbacterium testaceum_F
GCF_000202835.1	NC_015186.1	100	4214744	3749411	d__Bacteria;p__Proteobacteria;c__Alphaproteobacteria;o__Acetobacterales;f__Acetobacteraceae;g__Acidiphilium	s__Acidiphilium multivorum
GCF_000203835.1	NC_003888.3	100	9054847	8667507	d__Bacteria;p__Actinobacteriota;c__Actinobacteria;o__Streptomycetales;f__Streptomycetaceae;g__Streptomyces	s__Streptomyces coelicolor
GCF_000203935.1	NC_008577.1	99.84	5251146	4972204	d__Bacteria;p__Proteobacteria;c__Gammaproteobacteria;o__Enterobacterales;f__Shewanellaceae;g__Shewanella	s__Shewanella sp000203935
GCF_000204135.1	NC_015408.1	98.98	1106197	1106197	d__Bacteria;p__Verrucomicrobiota_A;c__Chlamydiia;o__Chlamydiales;f__Chlamydiaceae;g__Chlamydophila	s__Chlamydophila pecorum
GCF_000204155.1	NC_015434.1	100	6732271	6673976	d__Bacteria;p__Actinobacteriota;c__Actinobacteria;o__Mycobacteriales;f__Micromonosporaceae;g__Micromonospora	s__Micromonospora maris
GCF_000204255.1	NC_017287.1	97.89	1179220	1171667	d__Bacteria;p__Verrucomicrobiota_A;c__Chlamydiia;o__Chlamydiales;f__Chlamydiaceae;g__Chlamydophila	s__Chlamydophila psittaci
GCF_000204565.1	NC_015425.1	100	3207592	2773157	d__Bacteria;p__Firmicutes_A;c__Clostridia;o__Clostridiales;f__Clostridiaceae;g__Clostridium_H	s__Clostridium_H botulinum_B
GCF_000204645.1	NC_015422.1	99.85	5070751	4995263	d__Bacteria;p__Proteobacteria;c__Gammaproteobacteria;o__Burkholderiales;f__Burkholderiaceae;g__Alicycliphilus	s__Alicycliphilus denitrificans
GCF_000208385.1	NC_015436.1	100	2227296	2227296	d__Bacteria;p__Spirochaetota;c__Spirochaetia;o__Sphaerochaetales;f__Sphaerochaetaceae;g__Sphaerochaeta_A	s__Sphaerochaeta_A coccoides
GCF_000208405.1	NC_015437.1	100	2568361	2568361	d__Bacteria;p__Firmicutes_C;c__Negativicutes;o__Selenomonadales;f__Selenomonadaceae;g__Selenomonas	s__Selenomonas sputigena
GCF_000209655.1	NC_015458.1	100	3924810	3883605	d__Bacteria;p__Proteobacteria;c__Gammaproteobacteria;o__Burkholderiales;f__Burkholderiaceae;g__Candidimonas	s__Candidimonas sp000209655
GCF_000210895.1	NC_015964.1	99.89	2086875	2086875	d__Bacteria;p__Proteobacteria;c__Gammaproteobacteria;o__Enterobacterales;f__Pasteurellaceae;g__Haemophilus_D	s__Haemophilus_D parainfluenzae_A
GCF_000210915.2	NC_016620.1	95.09	3437906	3435933	d__Bacteria;p__Bdellovibrionota;c__Bacteriovoracia;o__Bacteriovoracales;f__Bacteriovoracaceae;g__Halobacteriovorax	s__Halobacteriovorax marinus
GCF_000211855.2	NC_015638.1	99.67	3296168	3296168	d__Bacteria;p__Bacteroidota;c__Bacteroidia;o__Flavobacteriales;f__Flavobacteriaceae;g__Lacinutrix	s__Lacinutrix sp000211855
GCF_000212355.1	NC_015496.1	99.62	3389993	3389993	d__Bacteria;p__Bacteroidota;c__Bacteroidia;o__Flavobacteriales;f__Flavobacteriaceae;g__Dokdonia	s__Dokdonia sp000212355
GCF_000212375.1	NC_015501.1	99.92	2186370	2186370	d__Bacteria;p__Bacteroidota;c__Bacteroidia;o__Bacteroidales;f__Porphyromonadaceae;g__Porphyromonas	s__Porphyromonas asaccharolytica
GCF_000212395.1	NC_015499.1	98.28	1898865	1898865	d__Bacteria;p__Thermodesulfobiota;c__Thermodesulfobiia;o__Thermodesulfobiales;f__Thermodesulfobiaceae;g__Thermodesulfobium	s__Thermodesulfobium narugense
GCF_000212415.1	NC_015500.1	100	3055580	3055580	d__Bacteria;p__Spirochaetota;c__Spirochaetia;o__Treponematales;f__Treponemataceae;g__Treponema_F	s__Treponema_F brennaborense
GCF_000212695.1	NC_015514.1	100	4266344	4266344	d__Bacteria;p__Actinobacteriota;c__Actinobacteria;o__Actinomycetales;f__Cellulomonadaceae;g__Cellulomonas	s__Cellulomonas fimi
GCF_000212735.1	NC_015510.1	99.49	8771651	8371686	d__Bacteria;p__Bacteroidota;c__Bacteroidia;o__Chitinophagales;f__Saprospiraceae;g__Haliscomenobacter	s__Haliscomenobacter hydrossis
GCF_000213255.1	NC_015520.1	97.98	3135972	3135972	d__Bacteria;p__Firmicutes_A;c__Mahellia;o__Mahellales;f__Mahellaceae;g__Mahella	s__Mahella australiensis
GCF_000213655.1	NC_015554.1	99.95	4972148	4972148	d__Bacteria;p__Proteobacteria;c__Gammaproteobacteria;o__Enterobacterales;f__Alteromonadaceae;g__Alteromonas	s__Alteromonas naphthalenivorans
GCF_000213785.1	NC_015557.1	100	1552775	1552775	d__Bacteria;p__Aquificota;c__Aquificae;o__Aquificales;f__Hydrogenobaculaceae;g__Hydrogenobaculum	s__Hydrogenobaculum sp000213785
GCF_000213805.1	NC_015556.1	99.6	4920769	4920769	d__Bacteria;p__Proteobacteria;c__Gammaproteobacteria;o__Pseudomonadales;f__Pseudomonadaceae;g__Pseudomonas_E	s__Pseudomonas_E fulva_B
GCF_000214095.2	NC_015942.1	99.34	3207552	3207552	d__Bacteria;p__Proteobacteria;c__Gammaproteobacteria;o__Acidithiobacillales;f__Acidithiobacillaceae;g__Acidithiobacillus	s__Acidithiobacillus ferrivorans
GCF_000214175.1	NC_015564.1	99.27	4863490	4738809	d__Bacteria;p__Actinobacteriota;c__Actinobacteria;o__Mycobacteriales;f__Mycobacteriaceae;g__Hoyosella	s__Hoyosella subflava
GCF_000214215.1	NC_015559.1	100	3899940	3899940	d__Bacteria;p__Proteobacteria;c__Gammaproteobacteria;o__Pseudomonadales;f__Marinomonadaceae;g__Marinomonas	s__Marinomonas posidonica
GCF_000214355.1	NC_015577.1	98.86	3855671	3855671	d__Bacteria;p__Spirochaetota;c__Spirochaetia;o__Treponematales;f__Treponemataceae_B;g__Treponema_E	s__Treponema_E azotonutricium
GCF_000214375.1	NC_015578.1	98.86	4059867	4059867	d__Bacteria;p__Spirochaetota;c__Spirochaetia;o__Treponematales;f__Treponemataceae_B;g__Treponema_E	s__Treponema_E primitia
GCF_000214665.1	NC_015572.1	99.93	5051681	5051681	d__Bacteria;p__Proteobacteria;c__Gammaproteobacteria;o__Methylococcales;f__Methylomonadaceae;g__Methylomonas	s__Methylomonas methanica_B
GCF_000214825.1	NC_015581.1	100	1932455	1932455	d__Bacteria;p__Proteobacteria;c__Gammaproteobacteria;o__Thiomicrospirales;f__Thiomicrospiraceae;g__Thiomicrospira	s__Thiomicrospira cyclica
GCF_000215085.1	NC_015589.1	99.37	3969014	3969014	d__Bacteria;p__Firmicutes_B;c__Desulfotomaculia;o__Desulfotomaculales;f__Desulfotomaculaceae;g__Desulfotomaculum_H	s__Desulfotomaculum_H ruminis
GCF_000215105.1	NC_015588.1	100	3307740	3307740	d__Bacteria;p__Actinobacteriota;c__Actinobacteria;o__Actinomycetales;f__Cellulomonadaceae;g__Isoptericola_B	s__Isoptericola_B variabilis
GCF_000215705.1	NC_015677.1	100	4070193	4070193	d__Bacteria;p__Proteobacteria;c__Gammaproteobacteria;o__Burkholderiales;f__Burkholderiaceae;g__Ramlibacter	s__Ramlibacter tataouinensis
GCF_000215745.1	NC_015663.1	100	5280350	5280350	d__Bacteria;p__Proteobacteria;c__Gammaproteobacteria;o__Enterobacterales;f__Enterobacteriaceae;g__Klebsiella_B	s__Klebsiella_B aerogenes
GCF_000215975.1	NC_015682.1	98.75	1634377	1634377	d__Bacteria;p__Desulfobacterota;c__Thermodesulfobacteria;o__Thermodesulfobacteriales;f__Thermodesulfobacteriaceae;g__Thermodesulfobacterium	s__Thermodesulfobacterium geofontis_B
GCF_000217635.1	NC_015662.1	98.12	444925	444925	d__Bacteria;p__Proteobacteria;c__Gammaproteobacteria;o__Enterobacterales;f__Enterobacteriaceae;g__Buchnera	s__Buchnera aphidicola_G
GCF_000217795.1	NC_015681.1	99.04	2322224	2322224	d__Bacteria;p__Desulfobacterota;c__Thermodesulfobacteria;o__Thermodesulfobacteriales;f__Thermodesulfatatoraceae;g__Thermodesulfatator	s__Thermodesulfatator indicus
GCF_000217815.1	NC_015707.1	100	2039943	2039943	d__Bacteria;p__Thermotogota;c__Thermotogae;o__Thermotogales;f__Thermotogaceae;g__Pseudothermotoga	s__Pseudothermotoga thermarum
GCF_000218545.1	NC_015671.1	100	3526441	3526441	d__Bacteria;p__Actinobacteriota;c__Actinobacteria;o__Actinomycetales;f__Cellulomonadaceae;g__Cellulomonas	s__Cellulomonas gilvus
GCF_000218565.1	NC_015684.1	99.68	3896074	3595748	d__Bacteria;p__Proteobacteria;c__Alphaproteobacteria;o__Rhizobiales;f__Xanthobacteraceae;g__Afipia	s__Afipia carboxidovorans
GCF_000218625.1	NC_015672.1	99.14	2526590	2526590	d__Bacteria;p__Deferribacterota;c__Deferribacteres;o__Deferribacterales;f__Flexistipitaceae;g__Flexistipes	s__Flexistipes sinusarabici
GCF_000219045.1	NC_015696.1	99.27	2035931	2035931	d__Bacteria;p__Proteobacteria;c__Gammaproteobacteria;o__Francisellales;f__Francisellaceae;g__Francisella	s__Francisella sp000219045
GCF_000219355.1	NC_015722.1	98.9	1183732	1183732	d__Bacteria;p__Proteobacteria;c__Alphaproteobacteria;o__Rickettsiales;f__Midichloriaceae;g__Midichloria	s__Midichloria mitochondrii
GCF_000219535.2	NZ_CP007806.1	99.73	5153859	5114147	d__Bacteria;p__Firmicutes_I;c__Bacilli_A;o__Brevibacillales;f__Brevibacillaceae;g__Brevibacillus_B	s__Brevibacillus_B laterosporus_C
GCF_000219585.1	NC_015731.1	100	3783444	3783444	d__Bacteria;p__Proteobacteria;c__Gammaproteobacteria;o__Burkholderiales;f__Nitrosomonadaceae;g__Nitrosomonas	s__Nitrosomonas sp000219585
GCF_000219605.1	NC_015740.1	99.86	4547930	4547930	d__Bacteria;p__Proteobacteria;c__Gammaproteobacteria;o__Pseudomonadales;f__Pseudomonadaceae;g__Pseudomonas_A	s__Pseudomonas_A stutzeri
GCF_000219725.1	NC_015732.1	98.86	3239340	3239340	d__Bacteria;p__Spirochaetota;c__Spirochaetia;o__Treponematales;f__Treponemataceae_B;g__Treponema_G	s__Treponema_G caldarium
GCF_000219875.1	NC_017167.1	100	3124048	3124048	d__Bacteria;p__Firmicutes_K;c__Alicyclobacillia;o__Alicyclobacillales;f__Alicyclobacillaceae;g__Alicyclobacillus	s__Alicyclobacillus acidocaldarius_A
GCF_000219915.2	NC_017964.1	94.16	4423879	4365995	d__Bacteria;p__Proteobacteria;c__Gammaproteobacteria;o__Burkholderiales;f__Burkholderiaceae;g__Advenella	s__Advenella kashmirensis
GCF_000220705.2	NZ_CP023202.1	100	7137891	7137891	d__Bacteria;p__Actinobacteriota;c__Actinobacteria;o__Streptomycetales;f__Streptomycetaceae;g__Streptomyces	s__Streptomyces xinghaiensis
GCF_000220945.1	NC_017186.1	100	10236779	10236779	d__Bacteria;p__Actinobacteriota;c__Actinobacteria;o__Mycobacteriales;f__Pseudonocardiaceae;g__Amycolatopsis	s__Amycolatopsis mediterranei
GCF_000221045.1	NC_015856.1	99.87	5186898	5186898	d__Bacteria;p__Proteobacteria;c__Gammaproteobacteria;o__Burkholderiales;f__Burkholderiaceae;g__Collimonas	s__Collimonas fungivorans_A
GCF_000222305.1	NC_015921.1	100	1403443	900755	d__Bacteria;p__Spirochaetota;c__Spirochaetia;o__Borreliales;f__Borreliaceae;g__Borreliella	s__Borreliella bissettii
GCF_000222485.1	NC_015914.1	100	6221273	6221273	d__Bacteria;p__Bacteroidota;c__Bacteroidia;o__Cytophagales;f__Cyclobacteriaceae;g__Cyclobacterium	s__Cyclobacterium marinum
GCF_000223215.1	NC_017243.1	99.2	3308048	3304788	d__Bacteria;p__Spirochaetota;c__Brachyspirae;o__Brachyspirales;f__Brachyspiraceae;g__Brachyspira	s__Brachyspira intermedia
GCF_000223375.1	NC_017384.1	95.42	3277101	2766400	d__Bacteria;p__Proteobacteria;c__Alphaproteobacteria;o__Rhodobacterales;f__Rhodobacteraceae;g__Ketogulonicigenium	s__Ketogulonicigenium vulgare
GCF_000224005.2	NZ_CP007031.1	99.94	3779112	3779112	d__Bacteria;p__Proteobacteria;c__Gammaproteobacteria;o__Chromatiales;f__Chromatiaceae;g__Marichromatium	s__Marichromatium purpuratum
GCF_000224085.1	NC_015945.1	99.34	3842422	3842422	d__Bacteria;p__Bacteroidota;c__Bacteroidia;o__Flavobacteriales;f__Flavobacteriaceae;g__Muricauda	s__Muricauda ruestringensis
GCF_000224105.1	NC_015946.1	99.62	832603	832603	d__Bacteria;p__Firmicutes;c__Bacilli;o__Mycoplasmatales;f__Mycoplasmataceae;g__Mycoplasma	s__Mycoplasma putrefaciens
GCF_000225345.1	NC_015977.1	99.44	3592125	3592125	d__Bacteria;p__Firmicutes_A;c__Clostridia;o__Lachnospirales;f__Lachnospiraceae;g__Roseburia	s__Roseburia hominis
GCF_000225445.1	NC_017256.1	100	653223	641794	d__Bacteria;p__Proteobacteria;c__Gammaproteobacteria;o__Enterobacterales;f__Enterobacteriaceae;g__Buchnera	s__Buchnera aphidicola_A
GCF_000225465.1	NC_017259.1	100	627953	615380	d__Bacteria;p__Proteobacteria;c__Gammaproteobacteria;o__Enterobacterales;f__Enterobacteriaceae;g__Buchnera	s__Buchnera aphidicola_B
GCF_000226315.1	NC_016026.1	90.81	2481983	2481983	d__Bacteria;p__Proteobacteria;c__Alphaproteobacteria;o__Micavibrionales;f__Micavibrionaceae;g__Micavibrio	s__Micavibrio aeruginosavorus_B
GCF_000226565.1	NC_016041.1	100	4134229	4134229	d__Bacteria;p__Proteobacteria;c__Gammaproteobacteria;o__Enterobacterales;f__Alteromonadaceae;g__Glaciecola	s__Glaciecola nitratireducens
GCF_000227665.2	NZ_CP007030.1	100	2158359	2158359	d__Bacteria;p__Proteobacteria;c__Gammaproteobacteria;o__Thiomicrospirales;f__Thiomicrospiraceae;g__Thiomicrospira	s__Thiomicrospira aerophila
GCF_000227685.2	NZ_CP007029.1	99.94	3756729	3756729	d__Bacteria;p__Proteobacteria;c__Gammaproteobacteria;o__Ectothiorhodospirales;f__Thioalkalivibrionaceae;g__Thioalkalivibrio_B	s__Thioalkalivibrio_B paradoxus
GCF_000227705.2	NC_019897.1	98.66	4355525	4206343	d__Bacteria;p__Firmicutes_I;c__Bacilli_A;o__Paenibacillales;f__Paenibacillaceae;g__Thermobacillus	s__Thermobacillus composti
GCF_000227745.2	NC_018012.1	99.83	5017071	5017071	d__Bacteria;p__Proteobacteria;c__Gammaproteobacteria;o__Chromatiales;f__Chromatiaceae;g__Thiocystis	s__Thiocystis violascens
GCF_000230555.1	NC_016078.1	99.18	3948887	3944837	d__Bacteria;p__Proteobacteria;c__Alphaproteobacteria;o__Rhizobiales;f__Devosiaceae;g__Pelagibacterium	s__Pelagibacterium halotolerans
GCF_000230695.2	NC_020541.1	100	4225490	4225490	d__Bacteria;p__Proteobacteria;c__Gammaproteobacteria;o__Xanthomonadales;f__Rhodanobacteraceae;g__Rhodanobacter	s__Rhodanobacter denitrificans
GCF_000230895.2	NC_016604.1	99.09	6415739	6415739	d__Bacteria;p__Actinobacteriota;c__Actinobacteria;o__Mycobacteriales;f__Mycobacteriaceae;g__Mycolicibacterium	s__Mycolicibacterium rhodesiae_A
GCF_000230975.2	NC_021172.1	99.4	3808687	3808687	d__Bacteria;p__Proteobacteria;c__Alphaproteobacteria;o__Rhizobiales;f__Hyphomicrobiaceae;g__Hyphomicrobium	s__Hyphomicrobium denitrificans_A
GCF_000230995.2	NC_019973.1	99.51	6200534	6200534	d__Bacteria;p__Proteobacteria;c__Alphaproteobacteria;o__Rhizobiales;f__Rhizobiaceae;g__Mesorhizobium	s__Mesorhizobium australicum
GCF_000231385.2	NC_018515.1	99.23	4873567	4873567	d__Bacteria;p__Firmicutes_B;c__Desulfitobacteriia;o__Desulfitobacteriales;f__Desulfitobacteriaceae;g__Desulfosporosinus	s__Desulfosporosinus meridiei
GCF_000231405.2	NZ_CP007032.1	99.36	3176073	3176073	d__Bacteria;p__Firmicutes_B;c__Desulfitobacteriia;o__Desulfitobacteriales;f__Desulfitobacteriaceae;g__Desulfitobacterium_A	s__Desulfitobacterium_A metallireducens
GCF_000233435.1	NC_016146.1	100	590336	587248	d__Bacteria;p__Bacteroidota;c__Bacteroidia;o__Flavobacteriales;f__Blattabacteriaceae;g__Blattabacterium	s__Blattabacterium sp000233435
GCF_000233715.2	NC_021184.1	99.06	4855529	4855529	d__Bacteria;p__Firmicutes_B;c__Desulfotomaculia;o__Desulfotomaculales;f__Desulfotomaculaceae_A;g__Desulfotomaculum_B	s__Desulfotomaculum_B gibsoniae
GCF_000233775.1	NC_016148.1	100	1999646	1967774	d__Bacteria;p__Synergistota;c__Synergistia;o__Synergistales;f__Thermovirgaceae;g__Thermovirga	s__Thermovirga lienii
GCF_000233915.3	NC_016147.2	97.76	3452554	3452554	d__Bacteria;p__Proteobacteria;c__Gammaproteobacteria;o__Xanthomonadales;f__Xanthomonadaceae;g__Pseudoxanthomonas_A	s__Pseudoxanthomonas_A spadix_B
GCF_000235405.2	NC_017095.1	98.25	2166381	2166381	d__Bacteria;p__Thermotogota;c__Thermotogae;o__Thermotogales;f__Fervidobacteriaceae;g__Fervidobacterium	s__Fervidobacterium pennivorans
GCF_000235585.1	NC_016641.1	99.85	6083395	6083395	d__Bacteria;p__Firmicutes_I;c__Bacilli_A;o__Paenibacillales;f__Paenibacillaceae;g__Paenibacillus	s__Paenibacillus terrae_B
GCF_000235605.1	NC_016584.1	99.17	5863081	5863081	d__Bacteria;p__Firmicutes_B;c__Desulfitobacteriia;o__Desulfitobacteriales;f__Desulfitobacteriaceae;g__Desulfosporosinus	s__Desulfosporosinus orientis
GCF_000236405.1	NC_016621.1	98.06	609561	605745	d__Bacteria;p__Bacteroidota;c__Bacteroidia;o__Flavobacteriales;f__Blattabacteriaceae;g__Blattabacterium	s__Blattabacterium punctulatus
GCF_000236585.1	NC_017278.1	100	2263488	2243772	d__Bacteria;p__Deinococcota;c__Deinococci;o__Deinococcales;f__Thermaceae;g__Thermus	s__Thermus sp000236585
GCF_000236665.1	NC_016616.1	100	3806980	3806980	d__Bacteria;p__Proteobacteria;c__Gammaproteobacteria;o__Burkholderiales;f__Rhodocyclaceae;g__Azospira	s__Azospira oryzae
GCF_000236685.1	NC_016633.1	100	3590853	3590853	d__Bacteria;p__Spirochaetota;c__Spirochaetia;o__Sphaerochaetales;f__Sphaerochaetaceae;g__Sphaerochaeta	s__Sphaerochaeta pleomorpha
GCF_000236705.1	NC_016599.1	100	4000057	4000057	d__Bacteria;p__Bacteroidota;c__Bacteroidia;o__Flavobacteriales;f__Cryomorphaceae;g__Owenweeksia	s__Owenweeksia hongkongensis
GCF_000236925.1	NC_016941.1	99.51	2787638	2762785	d__Bacteria;p__Firmicutes;c__Bacilli;o__Staphylococcales;f__Staphylococcaceae;g__Staphylococcus	s__Staphylococcus argenteus
GCF_000237085.1	NC_016627.1	100	4897678	4897678	d__Bacteria;p__Firmicutes_A;c__Clostridia;o__Acetivibrionales;f__Acetivibrionaceae;g__Acetivibrio	s__Acetivibrio clariflavum
GCF_000237205.1	NC_015713.1	96.28	2628375	2496337	d__Bacteria;p__Verrucomicrobiota_A;c__Chlamydiia;o__Parachlamydiales;f__Simkaniaceae;g__Simkania	s__Simkania negevensis
GCF_000237325.1	NC_017542.1	99.85	6231122	5864546	d__Bacteria;p__Firmicutes_I;c__Bacilli_A;o__Paenibacillales;f__Paenibacillaceae;g__Paenibacillus	s__Paenibacillus polymyxa_C
GCF_000237995.1	NC_016605.1	97.84	1978793	1829111	d__Bacteria;p__Firmicutes;c__Bacilli;o__Lactobacillales;f__Lactobacillaceae;g__Pediococcus	s__Pediococcus claussenii
GCF_000238995.1	NC_016638.1	75.16	919992	919992	d__Bacteria;p__Firmicutes;c__Bacilli;o__Mycoplasmatales;f__Mycoplasmoidaceae;g__Eperythrozoon_B	s__Eperythrozoon_B haemocanis
GCF_000240165.1	NC_017586.1	100	8095515	6282967	d__Bacteria;p__Actinobacteriota;c__Actinobacteria;o__Streptomycetales;f__Streptomycetaceae;g__Streptomyces_C	s__Streptomyces_C cattleya
GCF_000242255.2	NC_017033.1	98.68	3603458	3603458	d__Bacteria;p__Proteobacteria;c__Gammaproteobacteria;o__Xanthomonadales;f__Rhodanobacteraceae;g__Frateuria	s__Frateuria aurantia
GCF_000242455.2	NC_019892.1	99.61	9755686	9629675	d__Bacteria;p__Planctomycetota;c__Planctomycetes;o__Isosphaerales;f__Isosphaeraceae;g__Singulisphaera	s__Singulisphaera acidiphila
GCF_000242595.2	NC_017098.1	100	3285855	3285855	d__Bacteria;p__Spirochaetota;c__Spirochaetia;o__Spirochaetales;f__Alkalispirochaetaceae;g__Spirochaeta_B	s__Spirochaeta_B africana
GCF_000242635.2	NC_017770.1	100	5202069	5202069	d__Bacteria;p__Bacteroidota;c__Bacteroidia;o__Sphingobacteriales;f__Sphingobacteriaceae;g__Solitalea	s__Solitalea canadensis
GCF_000242895.2	NC_021171.1	99.44	4815602	4815602	d__Bacteria;p__Firmicutes;c__Bacilli;o__Bacillales;f__Bacillaceae_A;g__1NLA3E	s__1NLA3E sp000242895
GCF_000242935.2	NZ_CP007053.1	100	7417673	7317842	d__Bacteria;p__Verrucomicrobiota;c__Verrucomicrobiae;o__Opitutales;f__Opitutaceae;g__Geminisphaera	s__Geminisphaera sp000242935
GCF_000243075.1	NC_016745.1	100	3527244	3514537	d__Bacteria;p__Proteobacteria;c__Gammaproteobacteria;o__Enterobacterales;f__Aeromonadaceae;g__Oceanimonas	s__Oceanimonas sp000243075
GCF_000243115.2	NZ_CP007035.1	100	4697343	4697343	d__Bacteria;p__Bacteroidota;c__Bacteroidia;o__Chitinophagales;f__Chitinophagaceae;g__Niabella	s__Niabella soli
GCF_000243135.2	NC_019903.1	97.96	3624449	3624449	d__Bacteria;p__Firmicutes_B;c__Desulfitobacteriia;o__Desulfitobacteriales;f__Desulfitobacteriaceae;g__Desulfitobacterium	s__Desulfitobacterium dichloroeliminans
GCF_000243155.2	NC_018017.1	98.72	4321753	4321753	d__Bacteria;p__Firmicutes_B;c__Desulfitobacteriia;o__Desulfitobacteriales;f__Desulfitobacteriaceae;g__Desulfitobacterium	s__Desulfitobacterium dehalogenans
GCF_000244875.1	NC_016791.1	100	4613747	4613747	d__Bacteria;p__Firmicutes_A;c__Clostridia;o__Acetivibrionales;f__Acetivibrionaceae;g__Ruminiclostridium_A	s__Ruminiclostridium_A sp000244875
GCF_000246855.1	NC_016609.1	100	9033684	9033684	d__Bacteria;p__Bacteroidota;c__Bacteroidia;o__Chitinophagales;f__Chitinophagaceae;g__Niastella	s__Niastella koreensis
GCF_000247565.1	NC_016893.1	97.5	719535	719535	d__Bacteria;p__Proteobacteria;c__Gammaproteobacteria;o__Enterobacterales;f__Enterobacteriaceae;g__Wigglesworthia	s__Wigglesworthia glossinidia_B
GCF_000247605.1	NC_016894.1	100	4044777	4044777	d__Bacteria;p__Firmicutes_A;c__Clostridia;o__Eubacteriales;f__Eubacteriaceae;g__Acetobacterium	s__Acetobacterium woodii
GCF_000250635.1	NC_016940.1	100	4400185	4345237	d__Bacteria;p__Bacteroidota;c__Bacteroidia;o__Chitinophagales;f__Saprospiraceae;g__Saprospira	s__Saprospira grandis_B
GCF_000250655.1	NC_016935.1	98.52	8739048	8739048	d__Bacteria;p__Firmicutes_I;c__Bacilli_A;o__Paenibacillales;f__Paenibacillaceae;g__Paenibacillus_G	s__Paenibacillus_G mucilaginosus
GCF_000250675.2	NC_018681.1	99.37	9436348	9436348	d__Bacteria;p__Actinobacteriota;c__Actinobacteria;o__Mycobacteriales;f__Mycobacteriaceae;g__Nocardia	s__Nocardia brasiliensis_B
GCF_000252445.1	NC_017790.1	99.15	4406036	3137147	d__Bacteria;p__Deinococcota;c__Deinococci;o__Deinococcales;f__Deinococcaceae;g__Deinococcus	s__Deinococcus gobiensis
GCF_000252855.1	NC_017045.1	100	2164087	2164087	d__Bacteria;p__Bacteroidota;c__Bacteroidia;o__Flavobacteriales;f__Weeksellaceae;g__Riemerella	s__Riemerella anatipestifer
GCF_000252995.1	NC_015761.1	100	4460105	4460105	d__Bacteria;p__Proteobacteria;c__Gammaproteobacteria;o__Enterobacterales;f__Enterobacteriaceae;g__Salmonella	s__Salmonella bongori
GCF_000253155.1	NC_015291.1	99.74	1958690	1958690	d__Bacteria;p__Firmicutes;c__Bacilli;o__Lactobacillales;f__Streptococcaceae;g__Streptococcus	s__Streptococcus oralis_L
GCF_000253255.1	NC_015580.1	99.93	5313905	3911486	d__Bacteria;p__Proteobacteria;c__Alphaproteobacteria;o__Sphingomonadales;f__Sphingomonadaceae;g__Novosphingobium	s__Novosphingobium sp000253255
GCF_000253295.1	NC_015717.1	100	4757528	4757528	d__Bacteria;p__Proteobacteria;c__Alphaproteobacteria;o__Rhizobiales;f__Hyphomicrobiaceae;g__Hyphomicrobium	s__Hyphomicrobium sp000253295
GCF_000255115.2	NC_018068.1	99.49	4991181	4926837	d__Bacteria;p__Firmicutes_B;c__Desulfitobacteriia;o__Desulfitobacteriales;f__Desulfitobacteriaceae;g__Desulfosporosinus	s__Desulfosporosinus acidiphilus
GCF_000255135.1	NC_016751.1	98.28	2244793	2231407	d__Bacteria;p__Thermotogota;c__Thermotogae;o__Petrotogales;f__Petrotogaceae;g__Marinitoga	s__Marinitoga piezophila
GCF_000255295.1	NC_017030.1	99.35	10080619	10080619	d__Bacteria;p__Myxococcota;c__Myxococcia;o__Myxococcales;f__Myxococcaceae;g__Corallococcus	s__Corallococcus coralloides
GCF_000255535.1	NC_017047.1	99.73	5656799	4962173	d__Bacteria;p__Proteobacteria;c__Gammaproteobacteria;o__Enterobacterales;f__Enterobacteriaceae;g__Rahnella	s__Rahnella aquatilis_B
GCF_000258405.1	NC_017464.1	98.86	3658997	3658997	d__Bacteria;p__Bacteroidota;c__Ignavibacteria;o__Ignavibacteriales;f__Ignavibacteriaceae;g__Ignavibacterium	s__Ignavibacterium album
GCF_000259255.1	NC_017737.1	99.94	1960111	1947646	d__Bacteria;p__Campylobacterota;c__Campylobacteria;o__Campylobacterales;f__Helicobacteraceae;g__Helicobacter	s__Helicobacter cetorum_B
GCF_000259275.1	NC_017735.1	99.77	1847790	1833666	d__Bacteria;p__Campylobacterota;c__Campylobacteria;o__Campylobacterales;f__Helicobacteraceae;g__Helicobacter	s__Helicobacter cetorum
GCF_000260715.1	NC_017834.1	100	1932693	1932693	d__Bacteria;p__Actinobacteriota;c__Actinobacteria;o__Actinomycetales;f__Bifidobacteriaceae;g__Bifidobacterium	s__Bifidobacterium animalis
GCF_000260965.1	NC_017856.1	100	2745290	2697465	d__Bacteria;p__Proteobacteria;c__Gammaproteobacteria;o__Nitrosococcales;f__Methylophagaceae;g__Methylophaga	s__Methylophaga frappieri
GCF_000260985.4	NC_017857.3	100	3137100	3137100	d__Bacteria;p__Proteobacteria;c__Gammaproteobacteria;o__Nitrosococcales;f__Methylophagaceae;g__Methylophaga	s__Methylophaga nitratireducenticrescens
GCF_000261045.2	NZ_CP015613.1	99.98	5474685	5474685	d__Bacteria;p__Proteobacteria;c__Gammaproteobacteria;o__Enterobacterales;f__Enterobacteriaceae;g__Serratia	s__Serratia plymuthica_A
GCF_000261345.2	NZ_CP013738.1	99.84	7783599	7608611	d__Bacteria;p__Actinobacteriota;c__Actinobacteria;o__Streptomycetales;f__Streptomycetaceae;g__Streptomyces	s__Streptomyces globisporus_C
GCF_000262305.1	NC_017910.1	99.98	4158725	4158725	d__Bacteria;p__Proteobacteria;c__Gammaproteobacteria;o__Enterobacterales;f__Enterobacteriaceae;g__Shimwellia	s__Shimwellia blattae
GCF_000262715.1	NC_017924.1	96.47	632588	629165	d__Bacteria;p__Bacteroidota;c__Bacteroidia;o__Flavobacteriales;f__Blattabacteriaceae;g__Blattabacterium	s__Blattabacterium sp000262715
GCF_000264455.2	NC_017956.1	100	6512983	3919492	d__Bacteria;p__Proteobacteria;c__Alphaproteobacteria;o__Tistrellales;f__Tistrellaceae;g__Tistrella	s__Tistrella mobilis
GCF_000264765.2	NZ_CP006664.1	99.83	4329652	4200387	d__Bacteria;p__Proteobacteria;c__Gammaproteobacteria;o__Enterobacterales;f__Enterobacteriaceae;g__Edwardsiella	s__Edwardsiella anguillarum
GCF_000265295.1	NC_018002.1	99.87	2510109	2510109	d__Bacteria;p__Campylobacterota;c__Campylobacteria;o__Campylobacterales;f__Sulfurospirillaceae;g__Sulfurospirillum	s__Sulfurospirillum barnesii
GCF_000265365.1	NC_018011.1	100	3734239	3734239	d__Bacteria;p__Bacteroidota;c__Bacteroidia;o__Bacteroidales;f__Rikenellaceae;g__Alistipes	s__Alistipes finegoldii
GCF_000265385.1	NC_018013.1	99.49	3520671	3520671	d__Bacteria;p__Bacteroidota;c__Bacteroidia;o__Flavobacteriales;f__Flavobacteriaceae;g__Aequorivita	s__Aequorivita sublithincola
GCF_000265405.1	NC_018010.1	100	4196595	4196595	d__Bacteria;p__Bacteroidota;c__Bacteroidia;o__Cytophagales;f__Cyclobacteriaceae;g__Belliella	s__Belliella baltica
GCF_000265425.1	NC_018014.1	100	5227858	5227858	d__Bacteria;p__Acidobacteriota;c__Acidobacteriae;o__Acidobacteriales;f__Acidobacteriaceae;g__Terriglobus	s__Terriglobus roseus
GCF_000265465.1	NC_018016.1	100	2399175	2399175	d__Bacteria;p__Bacteroidota;c__Bacteroidia;o__Flavobacteriales;f__Weeksellaceae;g__Ornithobacterium	s__Ornithobacterium rhinotracheale
GCF_000265505.1	NC_018018.1	100	4919337	4919337	d__Bacteria;p__Bacteroidota;c__Bacteroidia;o__Cytophagales;f__Bernardetiaceae;g__Bernardetia	s__Bernardetia litoralis
GCF_000266885.1	NC_018020.1	95.51	4409302	4384015	d__Bacteria;p__Spirochaetota;c__Leptospirae;o__Turneriellales;f__Turneriellaceae;g__Turneriella	s__Turneriella parva
GCF_000266905.1	NC_018027.1	99.56	6342624	5583723	d__Bacteria;p__Actinobacteriota;c__Actinobacteria;o__Mycobacteriales;f__Mycobacteriaceae;g__Mycolicibacterium	s__Mycolicibacterium chubuense_A
GCF_000266945.1	NC_018025.1	98.39	6527027	6500104	d__Bacteria;p__Desulfobacterota;c__Desulfomonilia;o__Desulfomonilales;f__Desulfomonilaceae;g__Desulfomonile	s__Desulfomonile tiedjei
GCF_000267545.1	NC_018028.1	100	4709064	4709064	d__Bacteria;p__Proteobacteria;c__Gammaproteobacteria;o__Pseudomonadales;f__Pseudomonadaceae;g__Pseudomonas_A	s__Pseudomonas_A stutzeri_U
GCF_000269925.1	NC_015930.1	100	1950135	1950135	d__Bacteria;p__Firmicutes;c__Bacilli;o__Lactobacillales;f__Streptococcaceae;g__Lactococcus	s__Lactococcus garvieae
GCF_000269965.1	NC_017219.1	100	2828958	2828958	d__Bacteria;p__Actinobacteriota;c__Actinobacteria;o__Actinomycetales;f__Bifidobacteriaceae;g__Bifidobacterium	s__Bifidobacterium infantis
GCF_000269985.1	NC_016109.1	100	8783278	8783278	d__Bacteria;p__Actinobacteriota;c__Actinobacteria;o__Streptomycetales;f__Streptomycetaceae;g__Kitasatospora	s__Kitasatospora setae
GCF_000270205.1	NC_015913.1	100	1620005	1620005	d__Bacteria;p__Firmicutes_A;c__Clostridia;o__Clostridiales;f__Savagellaceae;g__Savagella	s__Savagella sp000270205
GCF_000270245.1	NC_015635.1	99.31	5683123	5683123	d__Bacteria;p__Actinobacteriota;c__Actinobacteria;o__Propionibacteriales;f__Propionibacteriaceae;g__Microlunatus	s__Microlunatus phosphovorus
GCF_000270285.1	NC_015738.1	100	3123671	3123671	d__Bacteria;p__Actinobacteriota;c__Coriobacteriia;o__Coriobacteriales;f__Eggerthellaceae;g__Enteroscipio	s__Enteroscipio sp000270285
GCF_000270305.1	NC_015737.1	98.56	2835737	2835737	d__Bacteria;p__Firmicutes_A;c__Clostridia;o__Lachnospirales;f__Lachnospiraceae;g__Eubacterium_I	s__Eubacterium_I sp000270305
GCF_000271405.2	NC_018081.1	99.63	2856440	2827741	d__Bacteria;p__Firmicutes;c__Bacilli;o__Lactobacillales;f__Enterococcaceae;g__Enterococcus_B	s__Enterococcus_B hirae
GCF_000271665.2	NZ_CP010978.1	100	5380816	5380816	d__Bacteria;p__Firmicutes_C;c__Negativicutes;o__Propionisporales;f__Pelosinaceae;g__Pelosinus	s__Pelosinus fermentans_A
GCF_000276685.1	NC_018108.1	100	1732123	1732123	d__Bacteria;p__Proteobacteria;c__Gammaproteobacteria;o__Burkholderiales;f__Burkholderiaceae;g__Taylorella	s__Taylorella equigenitalis
GCF_000277125.1	NC_016946.1	99.94	5402402	5402402	d__Bacteria;p__Actinobacteriota;c__Actinobacteria;o__Mycobacteriales;f__Mycobacteriaceae;g__Mycobacterium	s__Mycobacterium intracellulare
GCF_000277405.1	NC_017741.1	99.62	1663456	1663456	d__Bacteria;p__Campylobacterota;c__Campylobacteria;o__Campylobacterales;f__Helicobacteraceae;g__Helicobacter	s__Helicobacter pylori_C
GCF_000277795.1	NC_018149.1	66.57	650228	650228	d__Bacteria;p__Firmicutes;c__Bacilli;o__Mycoplasmatales;f__Mycoplasmoidaceae;g__Eperythrozoon_A	s__Eperythrozoon_A wenyonii_B
GCF_000279145.1	NC_018178.1	99.98	3300414	3300414	d__Bacteria;p__Bacteroidota;c__Ignavibacteria;o__Ignavibacteriales;f__Melioribacteraceae;g__Melioribacter	s__Melioribacter roseus
GCF_000279165.1	NC_018177.1	100	4174118	4174118	d__Bacteria;p__Proteobacteria;c__Gammaproteobacteria;o__Pseudomonadales;f__Pseudomonadaceae;g__Pseudomonas_A	s__Pseudomonas_A stutzeri_AG
GCF_000280495.2	NZ_CP018016.1	99.57	6122453	5817639	d__Bacteria;p__Proteobacteria;c__Gammaproteobacteria;o__Enterobacterales;f__Enterobacteriaceae;g__Kosakonia	s__Kosakonia radicincitans
GCF_000280925.3	NZ_CP012109.1	98.7	9490432	9490432	d__Bacteria;p__Myxococcota;c__Myxococcia;o__Myxococcales;f__Myxococcaceae;g__Myxococcus	s__Myxococcus hansupus
GCF_000281175.1	NC_017079.1	100	5144873	5144873	d__Bacteria;p__Chloroflexota;c__Anaerolineae;o__Caldilineales;f__Caldilineaceae;g__Caldilinea	s__Caldilinea aerophila
GCF_000283515.1	NC_015976.1	99.59	4348133	4199332	d__Bacteria;p__Proteobacteria;c__Alphaproteobacteria;o__Sphingomonadales;f__Sphingomonadaceae;g__Sphingobium	s__Sphingobium sp000283515
GCF_000283555.1	NC_016012.1	100	1515556	1515556	d__Bacteria;p__Firmicutes_A;c__Clostridia;o__Clostridiales;f__Savagellaceae;g__Savagella	s__Savagella sp000283555
GCF_000283575.1	NC_016048.1	98.99	4470622	4410036	d__Bacteria;p__Firmicutes_A;c__Clostridia;o__Oscillospirales;f__Oscillospiraceae;g__Oscillibacter	s__Oscillibacter valericigenes
GCF_000283615.1	NC_016052.1	99.34	2562720	2562720	d__Bacteria;p__Firmicutes;c__Bacilli;o__Lactobacillales;f__Enterococcaceae;g__Tetragenococcus	s__Tetragenococcus halophilus
GCF_000283635.1	NC_016749.1	100	2142762	2130034	d__Bacteria;p__Firmicutes;c__Bacilli;o__Lactobacillales;f__Streptococcaceae;g__Streptococcus	s__Streptococcus macedonicus
GCF_000283655.1	NC_016622.1	100	6846400	2988332	d__Bacteria;p__Proteobacteria;c__Alphaproteobacteria;o__Azospirillales;f__Azospirillaceae;g__Azospirillum	s__Azospirillum lipoferum_C
GCF_000284015.1	NC_016943.1	100	4875340	4875340	d__Bacteria;p__Actinobacteriota;c__Actinobacteria;o__Mycobacteriales;f__Geodermatophilaceae;g__Blastococcus	s__Blastococcus saxobsidens_A
GCF_000284035.1	NC_016887.1	99.37	6194645	6194645	d__Bacteria;p__Actinobacteriota;c__Actinobacteria;o__Mycobacteriales;f__Mycobacteriaceae;g__Nocardia	s__Nocardia cyriacigeorgica_B
GCF_000284095.1	NC_017068.1	100	3631933	3003680	d__Bacteria;p__Firmicutes_C;c__Negativicutes;o__Selenomonadales;f__Selenomonadaceae;g__Selenomonas_A	s__Selenomonas_A ruminantium_A
GCF_000284115.1	NC_017080.1	95.45	3884382	3803225	d__Bacteria;p__Planctomycetota;c__Phycisphaerae;o__Phycisphaerales;f__Phycisphaeraceae;g__Phycisphaera	s__Phycisphaera mikurensis
GCF_000284155.1	NC_017058.1	99.53	1323280	1296670	d__Bacteria;p__Proteobacteria;c__Alphaproteobacteria;o__Rickettsiales;f__Rickettsiaceae;g__Rickettsia	s__Rickettsia australis
GCF_000284235.1	NC_017192.1	99.59	2947662	2945673	d__Bacteria;p__Campylobacterota;c__Campylobacteria;o__Campylobacterales;f__Arcobacteraceae;g__Aliarcobacter	s__Aliarcobacter sp000284235
GCF_000284255.1	NC_017075.1	99.84	5043253	5043253	d__Bacteria;p__Proteobacteria;c__Gammaproteobacteria;o__Burkholderiales;f__Burkholderiaceae;g__Rubrivivax	s__Rubrivivax gelatinosus
GCF_000284275.1	NC_017082.1	99.96	7231841	7231841	d__Bacteria;p__Proteobacteria;c__Alphaproteobacteria;o__Rhizobiales;f__Xanthobacteraceae;g__Bradyrhizobium	s__Bradyrhizobium sp000284275
GCF_000284295.1	NC_017093.1	100	8773466	8773466	d__Bacteria;p__Actinobacteriota;c__Actinobacteria;o__Mycobacteriales;f__Micromonosporaceae;g__Actinoplanes	s__Actinoplanes missouriensis
GCF_000284315.1	NC_017094.1	94.49	2559538	2559538	d__Bacteria;p__Nitrospirota_A;c__Leptospirillia;o__Leptospirillales;f__Leptospirillaceae;g__Leptospirillum	s__Leptospirillum ferrooxidans
GCF_000284335.1	NC_017096.1	98.21	1558103	1558103	d__Bacteria;p__Caldisericota;c__Caldisericia;o__Caldisericales;f__Caldisericaceae;g__Caldisericum	s__Caldisericum exile
GCF_000284375.1	NC_017249.1	100	9207384	9207384	d__Bacteria;p__Proteobacteria;c__Alphaproteobacteria;o__Rhizobiales;f__Xanthobacteraceae;g__Bradyrhizobium	s__Bradyrhizobium japonicum
GCF_000284415.1	NC_017059.1	100	3876289	3876289	d__Bacteria;p__Proteobacteria;c__Alphaproteobacteria;o__Rhodospirillales;f__Rhodospirillaceae;g__Pararhodospirillum	s__Pararhodospirillum photometricum
GCF_000284455.1	NC_017039.1	99.78	3570114	3570114	d__Bacteria;p__Cyanobacteria;c__Cyanobacteriia;o__Cyanobacteriales;f__Microcystaceae;g__Synechocystis	s__Synechocystis sp000284455
GCF_000284515.1	NC_017668.1	99.33	4170008	4150632	d__Bacteria;p__Firmicutes;c__Bacilli;o__Bacillales;f__Halobacillaceae;g__Halobacillus	s__Halobacillus halophilus
GCF_000284595.1	NC_017671.1	100	4769156	4769156	d__Bacteria;p__Proteobacteria;c__Gammaproteobacteria;o__Xanthomonadales;f__Xanthomonadaceae;g__Stenotrophomonas	s__Stenotrophomonas maltophilia_F
GCF_000284615.1	NC_017067.1	100	3989480	3989480	d__Bacteria;p__Proteobacteria;c__Gammaproteobacteria;o__Pseudomonadales;f__Oleiphilaceae;g__Marinobacter	s__Marinobacter hydrocarbonoclasticus
GCF_000287335.1	NC_018419.1	100	1441139	1441139	d__Bacteria;p__Proteobacteria;c__Gammaproteobacteria;o__Enterobacterales;f__Enterobacteriaceae;g__GCF-000287335	s__GCF-000287335 sp000287335
GCF_000287355.1	NC_018420.1	98.75	1121596	1121596	d__Bacteria;p__Proteobacteria;c__Gammaproteobacteria;o__Enterobacterales;f__Enterobacteriaceae;g__GCF-000287355	s__GCF-000287355 sp000287355
GCF_000293885.2	NZ_CP010945.1	99.93	6998154	6998154	d__Bacteria;p__Proteobacteria;c__Gammaproteobacteria;o__Pseudomonadales;f__Pseudomonadaceae;g__Pseudomonas_E	s__Pseudomonas_E fluorescens_B
GCF_000294495.1	NC_018526.1	99.81	1980887	1980887	d__Bacteria;p__Firmicutes;c__Bacilli;o__Lactobacillales;f__Streptococcaceae;g__Streptococcus	s__Streptococcus suis
GCF_000294535.1	NC_018525.1	99.8	4842771	4842771	d__Bacteria;p__Proteobacteria;c__Gammaproteobacteria;o__Enterobacterales;f__Enterobacteriaceae;g__Pectobacterium	s__Pectobacterium carotovorum_E
GCF_000294775.2	NZ_CP015506.1	98.91	5848607	5461741	d__Bacteria;p__Firmicutes;c__Bacilli;o__Bacillales;f__Bacillaceae_A;g__Bacillus_AA	s__Bacillus_AA oceanisediminis_B
GCF_000296215.2	NZ_CP013949.1	99.7	7833499	7833499	d__Bacteria;p__Proteobacteria;c__Alphaproteobacteria;o__Rhizobiales;f__Xanthobacteraceae;g__Bradyrhizobium	s__Bradyrhizobium sp000296215
GCF_000296715.2	NZ_CP023474.1	99.73	6643437	6643437	d__Bacteria;p__Firmicutes_I;c__Bacilli_A;o__Brevibacillales;f__Brevibacillaceae;g__Brevibacillus	s__Brevibacillus brevis_B
GCF_000297055.2	NC_022357.1	98.82	3217213	3130594	d__Bacteria;p__Proteobacteria;c__Gammaproteobacteria;o__Burkholderiales;f__Sulfuricellaceae;g__Sulfuricella	s__Sulfuricella denitrificans
GCF_000299095.1	NC_018643.1	100	1343202	1343202	d__Bacteria;p__Proteobacteria;c__Alphaproteobacteria;o__Pelagibacterales;f__Pelagibacteraceae;g__Pelagibacter	s__Pelagibacter sp000299095
GCF_000299115.1	NC_018644.1	95.78	1410127	1410127	d__Bacteria;p__Proteobacteria;c__Alphaproteobacteria;o__HIMB59;f__HIMB59;g__HIMB59	s__HIMB59 sp000299115
GCF_000299235.1	NC_018649.1	94.14	2406157	2406157	d__Bacteria;p__Nitrospirota_A;c__Leptospirillia;o__Leptospirillales;f__Leptospirillaceae;g__Leptospirillum_A	s__Leptospirillum_A ferriphilum_A
GCF_000299335.2	NZ_CP004387.1	99.26	4168427	4168427	d__Bacteria;p__Proteobacteria;c__Gammaproteobacteria;o__Pseudomonadales;f__Alcanivoracaceae;g__Alcanivorax_A	s__Alcanivorax_A pacificus
GCF_000299355.1	NC_018664.1	95.25	3108248	3105335	d__Bacteria;p__Firmicutes_A;c__Clostridia;o__Tissierellales;f__Gottschalkiaceae;g__Gottschalkia	s__Gottschalkia acidurici
GCF_000300005.1	NC_018691.1	100	4928223	4928223	d__Bacteria;p__Proteobacteria;c__Gammaproteobacteria;o__Pseudomonadales;f__Alcanivoracaceae;g__Alcanivorax	s__Alcanivorax dieselolei
GCF_000300075.1	NC_018677.1	18.13	351658	351658	d__Bacteria;p__Proteobacteria;c__Gammaproteobacteria;o__Evansiales;f__Evansiaceae;g__Portiera	s__Portiera aleyrodidarum
GCF_000300135.1	NC_018673.1	99.48	1773468	1645096	d__Bacteria;p__Firmicutes;c__Bacilli;o__Lactobacillales;f__Lactobacillaceae;g__Leuconostoc	s__Leuconostoc carnosum
GCF_000300235.2	NZ_CP004388.1	100	4768950	4576570	d__Bacteria;p__Proteobacteria;c__Alphaproteobacteria;o__Rhodospirillales_A;f__Thalassospiraceae;g__Thalassospira	s__Thalassospira xiamenensis
GCF_000300295.4	NZ_CP011849.2	98.24	3507509	3184851	d__Bacteria;p__Proteobacteria;c__Gammaproteobacteria;o__Piscirickettsiales;f__Piscirickettsiaceae;g__Piscirickettsia	s__Piscirickettsia salmonis
GCF_000300455.3	NZ_CP007215.2	99.49	4902027	4902027	d__Bacteria;p__Proteobacteria;c__Gammaproteobacteria;o__Enterobacterales;f__Enterobacteriaceae;g__Kosakonia	s__Kosakonia sacchari
GCF_000302535.1	NC_018708.1	99.56	5196935	5196935	d__Bacteria;p__Proteobacteria;c__Gammaproteobacteria;o__Burkholderiales;f__Burkholderiaceae;g__Acidovorax_D	s__Acidovorax_D sp000302535
GCF_000304315.1	NC_018485.1	99.37	3773444	3773444	d__Bacteria;p__Proteobacteria;c__Alphaproteobacteria;o__Rhizobiales;f__Beijerinckiaceae;g__Methylocystis	s__Methylocystis sp000304315
GCF_000304455.1	NC_018605.1	72.93	944930	887130	d__Bacteria;p__Bacteroidota;c__Bacteroidia;o__Cytophagales;f__Amoebophilaceae;g__Cardinium	s__Cardinium sp000304455
GCF_000304735.1	NC_018887.1	99.19	905471	905471	d__Bacteria;p__Spirochaetota;c__Spirochaetia;o__Borreliales;f__Borreliaceae;g__Borreliella	s__Borreliella afzelii
GCF_000305785.2	NC_018868.3	100	4300227	4300227	d__Bacteria;p__Proteobacteria;c__Gammaproteobacteria;o__Pseudomonadales;f__Cellvibrionaceae;g__Simiduia	s__Simiduia agarivorans
GCF_000305935.1	NC_018870.1	98.52	2939057	2939057	d__Bacteria;p__Firmicutes_B;c__Syntrophomonadia;o__Thermacetogeniales;f__Thermacetogeniaceae;g__Thermacetogenium	s__Thermacetogenium phaeum
GCF_000306785.1	NC_017955.1	100	5575517	5575517	d__Bacteria;p__Actinobacteriota;c__Actinobacteria;o__Mycobacteriales;f__Geodermatophilaceae;g__Modestobacter	s__Modestobacter marinus
GCF_000306885.1	NC_018267.1	94.55	957990	957990	d__Bacteria;p__Proteobacteria;c__Alphaproteobacteria;o__Rickettsiales;f__Anaplasmataceae;g__Wolbachia	s__Wolbachia sp000306885
GCF_000307105.1	NC_018645.1	99.35	5197905	5197905	d__Bacteria;p__Desulfobacterota;c__Desulfobacteria;o__Desulfobacterales;f__Desulfobacteraceae;g__Desulfobacula	s__Desulfobacula toluolica
GCF_000307165.1	NC_018704.1	98.68	2569486	2569486	d__Bacteria;p__Firmicutes;c__Bacilli;o__Bacillales;f__Amphibacillaceae;g__Amphibacillus	s__Amphibacillus xylanus
GCF_000316175.1	NC_019670.1	99.93	6183388	6183388	d__Bacteria;p__Proteobacteria;c__Gammaproteobacteria;o__Pseudomonadales;f__Pseudomonadaceae;g__Pseudomonas_E	s__Pseudomonas_E sp000316175
GCF_000316515.1	NC_019675.1	99.73	3342364	3342364	d__Bacteria;p__Cyanobacteria;c__Cyanobacteriia;o__Synechococcales;f__Cyanobiaceae;g__Cyanobium	s__Cyanobium gracile
GCF_000316575.1	NC_019682.1	99.11	7023215	7023215	d__Bacteria;p__Cyanobacteria;c__Cyanobacteriia;o__Cyanobacteriales;f__Nostocaceae;g__PCC-7507	s__PCC-7507 sp000316575
GCF_000316605.1	NC_019683.1	99.42	5125950	5125950	d__Bacteria;p__Cyanobacteria;c__Cyanobacteriia;o__Cyanobacteriales;f__Limnotrichaceae;g__Limnothrix	s__Limnothrix sp000316605
GCF_000316625.1	NC_019676.1	99.26	6329823	6329823	d__Bacteria;p__Cyanobacteria;c__Cyanobacteriia;o__Cyanobacteriales;f__Nostocaceae;g__Anabaenopsis	s__Anabaenopsis sp000316625
GCF_000316645.1	NC_019684.1	99.33	6718869	6635030	d__Bacteria;p__Cyanobacteria;c__Cyanobacteriia;o__Cyanobacteriales;f__Nostocaceae;g__Trichormus	s__Trichormus sp000316645
GCF_000316665.1	NC_019678.1	99.78	8728773	8698463	d__Bacteria;p__Cyanobacteria;c__Cyanobacteriia;o__Cyanobacteriales;f__Nostocaceae;g__Rivularia	s__Rivularia sp000316665
GCF_000316685.1	NC_019680.1	99.29	3720499	3697276	d__Bacteria;p__Cyanobacteria;c__Cyanobacteriia;o__Thermosynechococcales;f__Thermosynechococcaceae;g__PCC-6312	s__PCC-6312 sp000316685
GCF_000317025.1	NC_019689.1	99.49	4986817	4986817	d__Bacteria;p__Cyanobacteria;c__Cyanobacteriia;o__Cyanobacteriales;f__Microcystaceae;g__Hydrococcus	s__Hydrococcus minor
GCF_000317045.1	NC_019703.1	99.87	4681111	4681111	d__Bacteria;p__Cyanobacteria;c__Cyanobacteriia;o__PCC-7407;f__PCC-7407;g__PCC-7407	s__PCC-7407 sp000317045
GCF_000317065.1	NC_019701.1	98.23	4885680	4557046	d__Bacteria;p__Cyanobacteria;c__Cyanobacteriia;o__Pseudanabaenales;f__Pseudanabaenaceae;g__PCC-7367	s__PCC-7367 sp000317065
GCF_000317085.1	NC_019702.1	99.76	3583735	3510253	d__Bacteria;p__Cyanobacteria;c__Cyanobacteriia;o__Pseudanabaenales;f__Pseudanabaenaceae;g__PCC-7502	s__PCC-7502 sp000317085
GCF_000317105.1	NC_019693.1	99.71	7804270	7689443	d__Bacteria;p__Cyanobacteria;c__Cyanobacteriia;o__Cyanobacteriales;f__Oscillatoriaceae;g__Oscillatoria	s__Oscillatoria acuminata
GCF_000317125.1	NC_019695.1	99.63	6689401	6315792	d__Bacteria;p__Cyanobacteria;c__Cyanobacteriia;o__Cyanobacteriales;f__Chroococcidiopsidaceae;g__Chroococcidiopsis	s__Chroococcidiopsis thermalis
GCF_000317305.3	NC_023036.2	99.62	5421267	5421267	d__Bacteria;p__Actinobacteriota;c__Actinobacteria;o__Mycobacteriales;f__Mycobacteriaceae;g__Mycolicibacterium	s__Mycolicibacterium neoaurum_A
GCF_000317435.1	NC_019751.1	99.76	6960392	6767834	d__Bacteria;p__Cyanobacteria;c__Cyanobacteriia;o__Cyanobacteriales;f__Nostocaceae;g__Calothrix	s__Calothrix parietina
GCF_000317475.1	NC_019729.1	99.78	8272254	7479014	d__Bacteria;p__Cyanobacteria;c__Cyanobacteriia;o__Cyanobacteriales;f__Phormidiaceae;g__Microcoleus	s__Microcoleus nigroviridis
GCF_000317495.1	NC_019753.1	99.48	5620407	5315554	d__Bacteria;p__Cyanobacteria;c__Cyanobacteriia;o__Cyanobacteriales;f__Chamaesiphonaceae;g__Crinalium	s__Crinalium epipsammum
GCF_000317515.1	NC_019738.1	99.56	7966510	7470429	d__Bacteria;p__Cyanobacteria;c__Cyanobacteriia;o__Cyanobacteriales;f__Coleofasciculaceae;g__Coleofasciculus	s__Coleofasciculus sp000317515
GCF_000317555.1	NC_019745.1	99.78	5882710	5431448	d__Bacteria;p__Cyanobacteria;c__Cyanobacteriia;o__Cyanobacteriales;f__Chroococcidiopsidaceae;g__Chroogloeocystis	s__Chroogloeocystis sp000317555
GCF_000317575.1	NC_019748.1	99.56	5544990	5041209	d__Bacteria;p__Cyanobacteria;c__Cyanobacteriia;o__Cyanobacteriales;f__Xenococcaceae;g__Stanieria	s__Stanieria cyanosphaera
GCF_000317615.1	NC_019780.1	99.55	3781008	3781008	d__Bacteria;p__Cyanobacteria;c__Cyanobacteriia;o__Cyanobacteriales;f__Rubidibacteraceae;g__Halothece	s__Halothece salina
GCF_000317635.1	NC_019779.1	99.48	4179170	4179170	d__Bacteria;p__Cyanobacteria;c__Cyanobacteriia;o__Cyanobacteriales;f__Rubidibacteraceae;g__Halothece	s__Halothece sp000317635
GCF_000317675.1	NC_019776.1	99.45	4176973	4114099	d__Bacteria;p__Cyanobacteria;c__Cyanobacteriia;o__Cyanobacteriales;f__Cyanobacteriaceae;g__Geminocystis	s__Geminocystis aponinum
GCF_000317695.1	NC_019771.1	99.44	7063285	6395836	d__Bacteria;p__Cyanobacteria;c__Cyanobacteriia;o__Cyanobacteriales;f__Nostocaceae;g__Anabaena_A	s__Anabaena_A cylindrica
GCF_000317835.1	NC_019793.1	99.36	4513714	3881839	d__Bacteria;p__Deinococcota;c__Deinococci;o__Deinococcales;f__Deinococcaceae;g__Deinococcus_A	s__Deinococcus_A peraridilitoris
GCF_000317895.1	NC_019567.1	97.3	3988594	3988594	d__Bacteria;p__Bdellovibrionota;c__Bdellovibrionia;o__Bdellovibrionales;f__Bdellovibrionaceae;g__Bdellovibrio	s__Bdellovibrio bacteriovorus_F
GCF_000319225.1	NC_019815.1	83.72	821813	821813	d__Bacteria;p__Proteobacteria;c__Gammaproteobacteria;o__Burkholderiales;f__Burkholderiaceae;g__Kinetoplastibacterium	s__Kinetoplastibacterium crithidii
GCF_000319245.1	NC_019814.1	83.73	820037	820037	d__Bacteria;p__Proteobacteria;c__Gammaproteobacteria;o__Burkholderiales;f__Burkholderiaceae;g__Kinetoplastibacterium	s__Kinetoplastibacterium blastocrithidii
GCF_000319385.1	NC_019566.1	80.94	1481191	1481191	d__Bacteria;p__Proteobacteria;c__Alphaproteobacteria;o__Thalassobaculales;f__Thalassobaculaceae;g__Endolissoclinum	s__Endolissoclinum faulkneri_B
GCF_000319575.2	NC_021291.1	96.31	1739487	1739487	d__Bacteria;p__Proteobacteria;c__Gammaproteobacteria;o__Nitrococcales;f__Nitrococcaceae;g__Spiribacter	s__Spiribacter salinus
GCF_000321415.2	NC_019902.2	99.66	4002350	4002350	d__Bacteria;p__Proteobacteria;c__Gammaproteobacteria;o__Ectothiorhodospirales;f__Thioalkalivibrionaceae;g__Thioalkalivibrio_B	s__Thioalkalivibrio_B nitratireducens
GCF_000325665.1	NC_019908.1	98.75	2555556	2555556	d__Bacteria;p__Spirochaetota;c__Brachyspirae;o__Brachyspirales;f__Brachyspiraceae;g__Brachyspira	s__Brachyspira pilosicoli
GCF_000325705.1	NC_019904.1	100	5608040	5608040	d__Bacteria;p__Bacteroidota;c__Bacteroidia;o__Cytophagales;f__Cyclobacteriaceae;g__Echinicola	s__Echinicola vietnamensis
GCF_000325745.1	NC_019907.1	100	1504659	1504659	d__Bacteria;p__Proteobacteria;c__Alphaproteobacteria;o__Rhizobiales;f__Rhizobiaceae_A;g__Liberibacter	s__Liberibacter crescens
GCF_000327045.1	NC_019940.1	98.67	4137521	4048921	d__Bacteria;p__Proteobacteria;c__Gammaproteobacteria;o__Chromatiales;f__Chromatiaceae;g__Thioflavicoccus	s__Thioflavicoccus mobilis
GCF_000327065.1	NC_019936.1	99.94	4600489	4575057	d__Bacteria;p__Proteobacteria;c__Gammaproteobacteria;o__Pseudomonadales;f__Pseudomonadaceae;g__Pseudomonas_A	s__Pseudomonas_A stutzeri_AE
GCF_000328565.1	NC_019966.1	100	7221766	6464916	d__Bacteria;p__Actinobacteriota;c__Actinobacteria;o__Mycobacteriales;f__Mycobacteriaceae;g__Mycolicibacterium	s__Mycolicibacterium sp000328565
GCF_000328625.1	NC_019978.1	98.23	2649255	2649255	d__Bacteria;p__Firmicutes_F;c__Halanaerobiia;o__Halobacteroidales;f__Halobacteroidaceae;g__Halobacteroides	s__Halobacteroides halobius
GCF_000328705.1	NC_019673.1	99.51	9360653	9360653	d__Bacteria;p__Actinobacteriota;c__Actinobacteria;o__Mycobacteriales;f__Pseudonocardiaceae;g__Saccharothrix	s__Saccharothrix espanaensis
GCF_000328725.1	NC_019949.1	100	998123	998123	d__Bacteria;p__Firmicutes;c__Bacilli;o__Mycoplasmatales;f__Metamycoplasmataceae;g__Mycoplasmopsis_A	s__Mycoplasmopsis_A cynos
GCF_000328765.2	NC_019954.2	97.08	2761252	2761252	d__Bacteria;p__Firmicutes_A;c__Thermovenabulia;o__Thermovenabulales;f__Tepidanaerobacteraceae;g__Tepidanaerobacter	s__Tepidanaerobacter acetatoxydans
GCF_000330845.1	NC_020063.1	100	4762179	4762179	d__Bacteria;p__Proteobacteria;c__Gammaproteobacteria;o__Enterobacterales;f__Enterobacteriaceae;g__Pseudocitrobacter	s__Pseudocitrobacter sp000330845
GCF_000330885.1	NC_020059.1	100	6686334	3837060	d__Bacteria;p__Proteobacteria;c__Alphaproteobacteria;o__Rhizobiales;f__Rhizobiaceae;g__Rhizobium	s__Rhizobium tropici
GCF_000331735.1	NC_020126.1	99.35	10350586	10350586	d__Bacteria;p__Myxococcota;c__Myxococcia;o__Myxococcales;f__Myxococcaceae;g__Myxococcus	s__Myxococcus stipitatus
GCF_000331995.1	NC_020134.1	97.9	2974379	2974379	d__Bacteria;p__Firmicutes_A;c__Clostridia;o__Acetivibrionales;f__Ruminiclostridiaceae_A;g__Ruminiclostridium_B	s__Ruminiclostridium_B stercorarium
GCF_000332115.1	NC_020156.1	98.54	3914632	3914632	d__Bacteria;p__Bacteroidota;c__Bacteroidia;o__Flavobacteriales;f__Flavobacteriaceae;g__Nonlabens	s__Nonlabens dokdonensis
GCF_000334405.1	NC_020195.1	97.62	638184	634449	d__Bacteria;p__Bacteroidota;c__Bacteroidia;o__Flavobacteriales;f__Blattabacteriaceae;g__Blattabacterium	s__Blattabacterium sp000334405
GCF_000340435.2	NZ_CP011883.2	99.13	4235765	4235765	d__Bacteria;p__Actinobacteriota;c__Actinobacteria;o__Mycobacteriales;f__Mycobacteriaceae;g__Mycobacterium	s__Mycobacterium haemophilum
GCF_000340795.1	NC_020294.1	83.9	833125	833125	d__Bacteria;p__Proteobacteria;c__Gammaproteobacteria;o__Burkholderiales;f__Burkholderiaceae;g__Kinetoplastibacterium	s__Kinetoplastibacterium desouzaii
GCF_000340865.1	NC_020299.1	83.19	810172	810172	d__Bacteria;p__Proteobacteria;c__Gammaproteobacteria;o__Burkholderiales;f__Burkholderiaceae;g__Kinetoplastibacterium	s__Kinetoplastibacterium oncopeltii
GCF_000340885.1	NC_020291.1	99.19	6666445	6530257	d__Bacteria;p__Firmicutes_A;c__Clostridia;o__Clostridiales;f__Clostridiaceae;g__Clostridium	s__Clostridium saccharoperbutylacetonicum
GCF_000340905.1	NC_020284.1	83.97	822140	822140	d__Bacteria;p__Proteobacteria;c__Gammaproteobacteria;o__Burkholderiales;f__Burkholderiaceae;g__Kinetoplastibacterium	s__Kinetoplastibacterium galatii
GCF_000341345.1	NC_020302.1	99.67	3222008	3135752	d__Bacteria;p__Actinobacteriota;c__Actinobacteria;o__Mycobacteriales;f__Mycobacteriaceae;g__Corynebacterium	s__Corynebacterium halotolerans
GCF_000341355.1	NC_020300.1	98.46	1596490	1596490	d__Bacteria;p__Proteobacteria;c__Alphaproteobacteria;o__Rhizobiales;f__Rhizobiaceae;g__Bartonella	s__Bartonella australis
GCF_000341385.1	NC_020301.1	100	1802699	1802699	d__Bacteria;p__Proteobacteria;c__Alphaproteobacteria;o__Rhizobiales;f__Rhizobiaceae;g__Bartonella	s__Bartonella vinsonii_A
GCF_000341395.1	NC_020304.1	98.13	4023512	3986761	d__Bacteria;p__Desulfobacterota;c__Desulfobulbia;o__Desulfobulbales;f__Desulfocapsaceae;g__Desulfocapsa	s__Desulfocapsa sulfexigens
GCF_000342265.1	NC_020417.1	99.45	2045720	2045720	d__Bacteria;p__Proteobacteria;c__Gammaproteobacteria;o__Burkholderiales;f__Burkholderiaceae;g__Polynucleobacter	s__Polynucleobacter sp000342265
GCF_000344785.1	NC_020506.1	99.45	2928683	2839551	d__Bacteria;p__Actinobacteriota;c__Actinobacteria;o__Mycobacteriales;f__Mycobacteriaceae;g__Corynebacterium	s__Corynebacterium callunae
GCF_000344805.1	NC_020453.1	99.35	8264165	8264165	d__Bacteria;p__Proteobacteria;c__Alphaproteobacteria;o__Rhizobiales;f__Xanthobacteraceae;g__Bradyrhizobium	s__Bradyrhizobium oligotrophicum
GCF_000346225.2	NZ_CP017432.1	99.98	5018820	5018820	d__Bacteria;p__Proteobacteria;c__Gammaproteobacteria;o__Pseudomonadales;f__Pseudomonadaceae;g__Pseudomonas_E	s__Pseudomonas_E sp000346225
GCF_000347595.1	NC_020515.1	98.9	2407846	2407846	d__Bacteria;p__Proteobacteria;c__Gammaproteobacteria;o__Enterobacterales;f__Pasteurellaceae;g__Bibersteinia	s__Bibersteinia trehalosi
GCF_000347635.1	NC_020514.1	98.46	5413691	5413691	d__Bacteria;p__Proteobacteria;c__Gammaproteobacteria;o__Enterobacterales;f__Alteromonadaceae;g__Paraglaciecola	s__Paraglaciecola psychrophila
GCF_000348725.1	NC_020813.1	99.1	2657893	2657893	d__Bacteria;p__Bdellovibrionota;c__Bdellovibrionia;o__Bdellovibrionales;f__Bdellovibrionaceae;g__Bdellovibrio_A	s__Bdellovibrio_A exovorus
GCF_000348745.1	NC_020812.1	90.81	2458610	2458610	d__Bacteria;p__Proteobacteria;c__Alphaproteobacteria;o__Micavibrionales;f__Micavibrionaceae;g__Micavibrio	s__Micavibrio aeruginosavorus_A
GCF_000348805.1	NC_020510.1	97.58	632490	632490	d__Bacteria;p__Bacteroidota;c__Bacteroidia;o__Flavobacteriales;f__Blattabacteriaceae;g__Blattabacterium	s__Blattabacterium cuenoti
GCF_000349845.1	NC_020829.1	100	5696307	5696307	d__Bacteria;p__Proteobacteria;c__Gammaproteobacteria;o__Pseudomonadales;f__Pseudomonadaceae;g__Pseudomonas	s__Pseudomonas sp000349845
GCF_000349945.1	NC_020516.1	99.9	5818755	5081166	d__Bacteria;p__Proteobacteria;c__Gammaproteobacteria;o__Burkholderiales;f__Rhodocyclaceae;g__Azoarcus_A	s__Azoarcus_A sp000349945
GCF_000355675.1	NC_020888.1	99.48	3920328	3920328	d__Bacteria;p__Proteobacteria;c__Gammaproteobacteria;o__Pseudomonadales;f__Saccharospirillaceae;g__Thalassolituus	s__Thalassolituus oleivorans
GCF_000355695.1	NC_020891.1	98.99	3063596	3063596	d__Bacteria;p__Actinobacteriota;c__Actinobacteria;o__Actinomycetales;f__Microbacteriaceae;g__Clavibacter	s__Clavibacter nebraskensis
GCF_000355765.4	NZ_CP021106.3	99.66	3261088	3261088	d__Bacteria;p__Proteobacteria;c__Gammaproteobacteria;o__Burkholderiales;f__Nitrosomonadaceae;g__Nitrosospira	s__Nitrosospira lacus
GCF_000364725.1	NC_021057.1	88.75	538203	538203	d__Bacteria;p__Proteobacteria;c__Gammaproteobacteria;o__Enterobacterales;f__Enterobacteriaceae;g__Moranella	s__Moranella endobia
GCF_000367405.1	NC_020993.1	99.59	1109301	1109301	d__Bacteria;p__Proteobacteria;c__Alphaproteobacteria;o__Rickettsiales;f__Rickettsiaceae;g__Rickettsia	s__Rickettsia prowazekii
GCF_000376585.1	NC_021084.1	100	1301823	1301823	d__Bacteria;p__Proteobacteria;c__Alphaproteobacteria;o__Rickettsiales;f__Anaplasmataceae;g__Wolbachia	s__Wolbachia sp000376585
GCF_000380335.1	NC_021149.1	99.59	5366370	5366370	d__Bacteria;p__Proteobacteria;c__Gammaproteobacteria;o__Pseudomonadales;f__Pseudomonadaceae;g__Azotobacter	s__Azotobacter vinelandii
GCF_000385925.1	NC_021175.1	99.13	2142100	2142100	d__Bacteria;p__Firmicutes;c__Bacilli;o__Lactobacillales;f__Streptococcaceae;g__Streptococcus	s__Streptococcus cristatus_B
GCF_000385945.1	NC_021177.1	99.84	7905758	7905758	d__Bacteria;p__Actinobacteriota;c__Actinobacteria;o__Streptomycetales;f__Streptomycetaceae;g__Streptomyces	s__Streptomyces fulvissimus
GCF_000389635.1	NC_021182.1	100	5044100	4990707	d__Bacteria;p__Firmicutes_A;c__Clostridia;o__Clostridiales;f__Clostridiaceae;g__Clostridium_I	s__Clostridium_I pasteurianum_A
GCF_000389965.1	NC_021191.1	99.47	9228054	9228054	d__Bacteria;p__Actinobacteriota;c__Actinobacteria;o__Mycobacteriales;f__Micromonosporaceae;g__Actinoplanes	s__Actinoplanes sp000389965
GCF_000397205.1	NC_021237.1	99.38	6867980	6867980	d__Bacteria;p__Proteobacteria;c__Gammaproteobacteria;o__Pseudomonadales;f__Pseudomonadaceae;g__Pseudomonas_E	s__Pseudomonas_E protegens
GCF_000400935.1	NC_021280.1	99.62	1123322	1123322	d__Bacteria;p__Firmicutes;c__Bacilli;o__Mycoplasmatales;f__Mycoplasmataceae;g__Spiroplasma	s__Spiroplasma chrysopicola
GCF_000400955.1	NC_021284.1	99.62	1107344	1107344	d__Bacteria;p__Firmicutes;c__Bacilli;o__Mycoplasmatales;f__Mycoplasmataceae;g__Spiroplasma	s__Spiroplasma syrphidicola
GCF_000410515.1	NC_021500.1	99.49	5155034	5039027	d__Bacteria;p__Proteobacteria;c__Gammaproteobacteria;o__Enterobacterales;f__Enterobacteriaceae;g__Kosakonia	s__Kosakonia sp000410515
GCF_000412265.2	NZ_CP011664.1	99.58	8716193	7868178	d__Bacteria;p__Actinobacteriota;c__Actinobacteria;o__Streptomycetales;f__Streptomycetaceae;g__Streptomyces	s__Streptomyces sp000412265
GCF_000412675.1	NC_021505.1	99.88	6156701	6156701	d__Bacteria;p__Proteobacteria;c__Gammaproteobacteria;o__Pseudomonadales;f__Pseudomonadaceae;g__Pseudomonas_E	s__Pseudomonas_E putida
GCF_000412695.1	NC_021499.1	100	6484828	6285863	d__Bacteria;p__Proteobacteria;c__Gammaproteobacteria;o__Pseudomonadales;f__Pseudomonadaceae;g__Pseudomonas_F	s__Pseudomonas_F resinovorans_A
GCF_000418325.1	NC_021658.1	93.87	14782125	14782125	d__Bacteria;p__Myxococcota;c__Polyangia;o__Polyangiales;f__Polyangiaceae;g__Sorangium	s__Sorangium cellulosum_D
GCF_000418365.1	NC_021663.1	98.87	2751233	2751233	d__Bacteria;p__Actinobacteriota;c__Actinobacteria;o__Mycobacteriales;f__Mycobacteriaceae;g__Corynebacterium	s__Corynebacterium terpenotabidum
GCF_000422085.1	NC_021741.1	100	5282719	5238612	d__Bacteria;p__Proteobacteria;c__Gammaproteobacteria;o__Enterobacterales;f__Enterobacteriaceae;g__Serratia	s__Serratia liquefaciens
GCF_000427275.1	NC_021738.1	99.36	2501382	2501382	d__Bacteria;p__Proteobacteria;c__Gammaproteobacteria;o__Enterobacterales;f__Pasteurellaceae;g__Mannheimia	s__Mannheimia haemolytica
GCF_000439435.1	NC_021846.1	98.87	1086278	1075140	d__Bacteria;p__Firmicutes;c__Bacilli;o__Mycoplasmatales;f__Mycoplasmataceae;g__Spiroplasma_A	s__Spiroplasma_A taiwanense
GCF_000439455.1	NC_021833.1	98.87	945296	945296	d__Bacteria;p__Firmicutes;c__Bacilli;o__Mycoplasmatales;f__Mycoplasmataceae;g__Spiroplasma_A	s__Spiroplasma_A diminutum
GCF_000441555.1	NC_021885.1	33.47	464857	459399	d__Bacteria;p__Proteobacteria;c__Gammaproteobacteria;o__Burkholderiales;f__Burkholderiaceae;g__Profftella	s__Profftella armatura
GCF_000442645.1	NC_021915.1	99.12	2833547	2787574	d__Bacteria;p__Actinobacteriota;c__Actinobacteria;o__Mycobacteriales;f__Mycobacteriaceae;g__Corynebacterium	s__Corynebacterium maris
GCF_000444875.1	NC_021985.1	99.89	8377286	8272925	d__Bacteria;p__Actinobacteriota;c__Actinobacteria;o__Streptomycetales;f__Streptomycetaceae;g__Streptomyces	s__Streptomyces collinus
GCF_000444995.1	NC_022041.1	99.6	4873118	3613807	d__Bacteria;p__Proteobacteria;c__Alphaproteobacteria;o__Rhodobacterales;f__Rhodobacteraceae;g__Paracoccus	s__Paracoccus aminophilus
GCF_000445425.4	NC_022079.2	98.9	937966	907293	d__Bacteria;p__Spirochaetota;c__Spirochaetia;o__Borreliales;f__Borreliaceae;g__Borrelia	s__Borrelia miyamotoi
GCF_000445995.2	NC_022080.4	98.87	3486308	3446630	d__Bacteria;p__Firmicutes;c__Bacilli;o__Bacillales;f__Anoxybacillaceae;g__Geobacillus	s__Geobacillus sp000445995
GCF_000447675.1	NC_022097.1	100	2889325	2889325	d__Bacteria;p__Spirochaetota;c__Spirochaetia;o__Treponematales;f__Treponemataceae;g__Treponema_B	s__Treponema_B pedis
GCF_000452705.1	NZ_CP007014.1	99.62	5811653	5758024	d__Bacteria;p__Proteobacteria;c__Gammaproteobacteria;o__Pseudomonadales;f__Pseudomonadaceae;g__Pseudomonas_E	s__Pseudomonas_E syringae_F
GCF_000455605.1	NC_017025.1	99.29	2993089	2993089	d__Bacteria;p__Bacteroidota;c__Bacteroidia;o__Flavobacteriales;f__Flavobacteriaceae;g__Flavobacterium	s__Flavobacterium indicum
GCF_000470775.1	NC_022438.1	98.73	2686418	2686418	d__Bacteria;p__Actinobacteriota;c__Actinobacteria;o__Actinomycetales;f__Microbacteriaceae;g__Leifsonia	s__Leifsonia xyli_B
GCF_000471025.2	NZ_CP015840.1	97.97	1067202	1059583	d__Bacteria;p__Verrucomicrobiota_A;c__Chlamydiia;o__Chlamydiales;f__Chlamydiaceae;g__Chlamydophila	s__Chlamydophila gallinacea
GCF_000471965.1	NC_022550.1	97.65	626626	622952	d__Bacteria;p__Bacteroidota;c__Bacteroidia;o__Flavobacteriales;f__Blattabacteriaceae;g__Blattabacterium	s__Blattabacterium sp000471965
GCF_000473245.1	NC_022524.1	98.36	4884713	4884713	d__Bacteria;p__Firmicutes;c__Bacilli;o__Bacillales;f__Bacillaceae_A;g__Bacillus_AB	s__Bacillus_AB infantis
GCF_000473305.1	NZ_CP006772.1	96.03	2657245	2657245	d__Bacteria;p__Bacteroidota;c__Bacteroidia;o__Bacteroidales;f__UBA932;g__Bact-08	s__Bact-08 sp000473305
GCF_000473995.1	NC_022571.1	99.19	5107814	5107814	d__Bacteria;p__Firmicutes_A;c__Clostridia;o__Clostridiales;f__Clostridiaceae;g__Clostridium	s__Clostridium saccharobutylicum
GCF_000477415.1	NC_022575.1	68.2	564395	564395	d__Bacteria;p__Firmicutes;c__Bacilli;o__Mycoplasmatales;f__Mycoplasmoidaceae;g__Eperythrozoon_A	s__Eperythrozoon_A parvum
GCF_000477435.1	NC_022576.1	94.41	2991840	2991840	d__Bacteria;p__Proteobacteria;c__Gammaproteobacteria;o__Burkholderiales;f__Burkholderiaceae;g__Symbiobacter	s__Symbiobacter mobilis
GCF_000478825.2	NZ_CP007542.1	99.56	3738889	3485441	d__Bacteria;p__Cyanobacteria;c__Cyanobacteriia;o__Cyanobacteriales;f__Microcystaceae;g__Synechocystis	s__Synechocystis sp000478825
GCF_000478885.1	NC_022567.1	100	2862526	2862526	d__Bacteria;p__Actinobacteriota;c__Coriobacteriia;o__Coriobacteriales;f__Eggerthellaceae;g__Adlercreutzia	s__Adlercreutzia equolifaciens
GCF_000479315.1	NC_022582.1	99.83	2023580	2023580	d__Bacteria;p__Firmicutes;c__Bacilli;o__Lactobacillales;f__Streptococcaceae;g__Streptococcus	s__Streptococcus sp000479315
GCF_000484535.1	NC_022600.1	98.29	4724791	4724791	d__Bacteria;p__Cyanobacteria;c__Cyanobacteriia;o__Gloeobacterales;f__Gloeobacteraceae;g__Gloeobacter	s__Gloeobacter kilaueensis
GCF_000485905.1	NC_022664.1	95.46	1926631	1926631	d__Bacteria;p__Proteobacteria;c__Gammaproteobacteria;o__Nitrococcales;f__Nitrococcaceae;g__Spiribacter	s__Spiribacter curvatus
GCF_000494755.1	NC_022657.1	100	9376071	9376071	d__Bacteria;p__Actinobacteriota;c__Actinobacteria;o__Mycobacteriales;f__Micromonosporaceae;g__Actinoplanes	s__Actinoplanes friuliensis
GCF_000496285.1	NC_022781.1	97.66	5025419	4940474	d__Bacteria;p__Firmicutes;c__Bacilli;o__Bacillales;f__Bacillaceae_G;g__Bacillus_A	s__Bacillus_A toyonensis
GCF_000496595.1	NC_022793.1	96.45	1195201	1195201	d__Bacteria;p__Proteobacteria;c__Alphaproteobacteria;o__Rhizobiales;f__Rhizobiaceae_A;g__Liberibacter	s__Liberibacter americanus
GCF_000498395.2	NZ_CP010979.1	99.88	6621848	6621848	d__Bacteria;p__Proteobacteria;c__Gammaproteobacteria;o__Pseudomonadales;f__Pseudomonadaceae;g__Pseudomonas_E	s__Pseudomonas_E putida_Q
GCF_000500935.1	NC_022998.1	98.12	1160554	1160554	d__Bacteria;p__Firmicutes;c__Bacilli;o__Mycoplasmatales;f__Mycoplasmataceae;g__Spiroplasma_A	s__Spiroplasma_A apis
GCF_000503895.1	NC_022997.1	98.88	3653837	3653837	d__Bacteria;p__Proteobacteria;c__Alphaproteobacteria;o__Rhizobiales;f__Hyphomicrobiaceae;g__Hyphomicrobium	s__Hyphomicrobium nitrativorans
GCF_000507245.1	NC_023035.1	100	3782798	3782798	d__Bacteria;p__Spirochaetota;c__Spirochaetia;o__Spirochaetales;f__Salinispiraceae;g__Salinispira	s__Salinispira pacifica
GCF_000508225.1	NC_023063.1	98.72	1196717	1196717	d__Bacteria;p__Proteobacteria;c__Alphaproteobacteria;o__Rickettsiales;f__Anaplasmataceae;g__Ehrlichia	s__Ehrlichia muris
GCF_000508245.1	NC_023062.1	65.57	702511	702511	d__Bacteria;p__Firmicutes;c__Bacilli;o__Mycoplasmatales;f__Mycoplasmoidaceae;g__Eperythrozoon_A	s__Eperythrozoon_A ovis
GCF_000510265.1	NZ_CP006745.1	80.94	1518636	1518636	d__Bacteria;p__Proteobacteria;c__Alphaproteobacteria;o__Thalassobaculales;f__Thalassobaculaceae;g__Endolissoclinum	s__Endolissoclinum faulkneri_A
GCF_000510285.1	NC_023075.1	99.82	6000087	6000087	d__Bacteria;p__Proteobacteria;c__Gammaproteobacteria;o__Pseudomonadales;f__Pseudomonadaceae;g__Pseudomonas_E	s__Pseudomonas_E monteilii_B
GCF_000511355.1	NC_023135.1	99.82	4650996	4144900	d__Bacteria;p__Proteobacteria;c__Alphaproteobacteria;o__Rhodobacterales;f__Rhodobacteraceae;g__Leisingera	s__Leisingera methylohalidivorans
GCF_000511385.1	NC_023137.1	99.47	4540155	3776653	d__Bacteria;p__Proteobacteria;c__Alphaproteobacteria;o__Rhodobacterales;f__Rhodobacteraceae;g__Phaeobacter	s__Phaeobacter gallaeciensis
GCF_000512205.2	NZ_CP006644.1	100	6580298	6205897	d__Bacteria;p__Proteobacteria;c__Alphaproteobacteria;o__Sphingomonadales;f__Sphingomonadaceae;g__Sphingomonas_D	s__Sphingomonas_D sanxanigenens
GCF_000512355.1	NZ_CP004006.1	98.25	2773209	2722964	d__Bacteria;p__Proteobacteria;c__Gammaproteobacteria;o__Legionellales;f__Legionellaceae;g__Legionella_A	s__Legionella_A oakridgensis
GCF_000512735.1	NZ_CP007028.1	99.59	1521037	1521037	d__Bacteria;p__Aquificota;c__Aquificae;o__Aquificales;f__Aquificaceae;g__Thermocrinis	s__Thermocrinis ruber
GCF_000512895.1	NZ_CP007033.1	99.94	2943336	2943336	d__Bacteria;p__Firmicutes_B;c__Desulfitobacteriia;o__Desulfitobacteriales;f__Syntrophobotulaceae;g__Dehalobacter	s__Dehalobacter restrictus
GCF_000512915.1	NZ_CP007034.1	99.62	3076856	3076856	d__Bacteria;p__Bacteroidota;c__Bacteroidia;o__Bacteroidales;f__Barnesiellaceae;g__Barnesiella	s__Barnesiella viscericola
GCF_000513215.1	NZ_HG326223.1	99.86	5113802	5113802	d__Bacteria;p__Proteobacteria;c__Gammaproteobacteria;o__Enterobacterales;f__Enterobacteriaceae;g__Serratia	s__Serratia marcescens_B
GCF_000513295.1	NC_023065.1	99.88	4365796	4365796	d__Bacteria;p__Proteobacteria;c__Alphaproteobacteria;o__Rhodospirillales_B;f__Magnetospirillaceae;g__Magnetospirillum	s__Magnetospirillum gryphiswaldense
GCF_000513475.1	NC_023003.1	50	1118422	1118422	d__Bacteria;p__Dependentiae;c__Babeliae;o__Babeliales;f__Babeliaceae;g__Babela	s__Babela massiliensis
GCF_000517405.1	NZ_CP006568.1	99.38	4513140	4513140	d__Bacteria;p__Proteobacteria;c__Gammaproteobacteria;o__Enterobacterales;f__Enterobacteriaceae;g__Sodalis_A	s__Sodalis_A pierantonius
GCF_000517425.1	NZ_CP006569.1	98.69	5159425	4709528	d__Bacteria;p__Proteobacteria;c__Gammaproteobacteria;o__Enterobacterales;f__Enterobacteriaceae;g__Sodalis_A	s__Sodalis_A praecaptivus
GCF_000517565.1	NZ_CP007051.1	98.77	1819992	1816487	d__Bacteria;p__Campylobacterota;c__Desulfurellia;o__Desulfurellales;f__Desulfurellaceae;g__Desulfurella	s__Desulfurella acetivorans
GCF_000520015.2	NZ_CP007044.2	100	5488183	5488183	d__Bacteria;p__Proteobacteria;c__Gammaproteobacteria;o__Enterobacterales;f__Enterobacteriaceae;g__Chania	s__Chania multitudinisentens
GCF_000521505.1	NZ_CP003915.1	99.84	4764126	4740516	d__Bacteria;p__Proteobacteria;c__Gammaproteobacteria;o__Burkholderiales;f__Burkholderiaceae;g__Advenella	s__Advenella mimigardefordensis
GCF_000521565.1	NZ_CP002701.1	100	651316	643517	d__Bacteria;p__Proteobacteria;c__Gammaproteobacteria;o__Enterobacterales;f__Enterobacteriaceae;g__Buchnera	s__Buchnera aphidicola_C
GCF_000521605.1	NZ_CP006942.1	99.81	2393449	2393449	d__Bacteria;p__Proteobacteria;c__Gammaproteobacteria;o__Enterobacterales;f__Pasteurellaceae;g__Mannheimia	s__Mannheimia sp000521605
GCF_000521695.1	NZ_CP006944.1	99.81	2131927	2131927	d__Bacteria;p__Proteobacteria;c__Gammaproteobacteria;o__Enterobacterales;f__Pasteurellaceae;g__Mannheimia	s__Mannheimia varigena
GCF_000522985.1	NZ_CP007128.1	98.35	7479215	5311527	d__Bacteria;p__Gemmatimonadota;c__Gemmatimonadetes;o__Gemmatimonadales;f__Gemmatimonadaceae;g__Gemmatirosa	s__Gemmatirosa kalamazoonesis
GCF_000523235.1	NZ_CP006850.1	99.37	8348532	8348532	d__Bacteria;p__Actinobacteriota;c__Actinobacteria;o__Mycobacteriales;f__Mycobacteriaceae;g__Nocardia	s__Nocardia nova_A
GCF_000524555.1	NZ_CP007154.1	100	760240	760240	d__Bacteria;p__Firmicutes;c__Bacilli;o__Mycoplasmatales;f__Metamycoplasmataceae;g__Mesomycoplasma	s__Mesomycoplasma bovoculi
GCF_000525635.1	NZ_CP007155.1	100	9874926	9874926	d__Bacteria;p__Actinobacteriota;c__Actinobacteria;o__Mycobacteriales;f__Pseudonocardiaceae;g__Kutzneria	s__Kutzneria albida
GCF_000525655.1	NZ_CP007156.1	99.32	2719616	2677607	d__Bacteria;p__Actinobacteriota;c__Actinobacteria;o__Mycobacteriales;f__Mycobacteriaceae;g__Corynebacterium	s__Corynebacterium falsenii
GCF_000525675.1	NZ_CP002190.1	97.75	3006992	3006992	d__Bacteria;p__Bdellovibrionota;c__Bdellovibrionia;o__Bdellovibrionales;f__Bdellovibrionaceae;g__Bdellovibrio	s__Bdellovibrio bacteriovorus_A
GCF_000550785.1	NZ_CP004350.1	99.34	3132213	3113488	d__Bacteria;p__Actinobacteriota;c__Actinobacteria;o__Mycobacteriales;f__Mycobacteriaceae;g__Corynebacterium	s__Corynebacterium casei
GCF_000550805.1	NZ_CP004353.1	99.67	2931780	2931780	d__Bacteria;p__Actinobacteriota;c__Actinobacteria;o__Mycobacteriales;f__Mycobacteriaceae;g__Corynebacterium	s__Corynebacterium vitaeruminis
GCF_000565175.1	NZ_CP006681.1	98.87	1175131	1175131	d__Bacteria;p__Firmicutes;c__Bacilli;o__Mycoplasmatales;f__Mycoplasmataceae;g__Spiroplasma_A	s__Spiroplasma_A culicicola
GCF_000565195.1	NZ_CP006720.1	95.74	1132608	1132608	d__Bacteria;p__Firmicutes;c__Bacilli;o__Mycoplasmatales;f__Mycoplasmataceae;g__Spiroplasma	s__Spiroplasma mirum
GCF_000565215.1	NZ_CP006934.1	99.25	1075953	1075953	d__Bacteria;p__Firmicutes;c__Bacilli;o__Mycoplasmatales;f__Mycoplasmataceae;g__Spiroplasma_B	s__Spiroplasma_B sabaudiense
GCF_000568815.1	NZ_CP007201.1	100	3175729	3175729	d__Bacteria;p__Campylobacterota;c__Campylobacteria;o__Campylobacterales;f__Sulfurospirillaceae;g__Sulfurospirillum	s__Sulfurospirillum multivorans
GCF_000576555.1	NZ_CP007145.1	99.85	5252070	4904241	d__Bacteria;p__Bacteroidota;c__Bacteroidia;o__Cytophagales;f__Hymenobacteraceae;g__Hymenobacter	s__Hymenobacter swuensis
GCF_000583875.1	NZ_CP006571.1	96.45	1048269	1041170	d__Bacteria;p__Verrucomicrobiota_A;c__Chlamydiia;o__Chlamydiales;f__Chlamydiaceae;g__Chlamydophila	s__Chlamydophila avium
GCF_000585995.1	NZ_CP007410.1	100	6652396	6652396	d__Bacteria;p__Proteobacteria;c__Gammaproteobacteria;o__Pseudomonadales;f__Pseudomonadaceae;g__Pseudomonas_E	s__Pseudomonas_E brassicacearum_A
GCF_000590475.1	NZ_CP007441.1	99.8	4731359	4731359	d__Bacteria;p__Proteobacteria;c__Gammaproteobacteria;o__Pseudomonadales;f__Pseudomonadaceae;g__Pseudomonas_A	s__Pseudomonas_A stutzeri_D
GCF_000590555.1	NC_022198.1	99.4	2031902	2031902	d__Bacteria;p__Actinobacteriota;c__Actinobacteria;o__Mycobacteriales;f__Mycobacteriaceae;g__Corynebacterium	s__Corynebacterium argentoratense
GCF_000590925.1	NZ_CP004372.1	97.94	3555109	3555109	d__Bacteria;p__Proteobacteria;c__Alphaproteobacteria;o__Rhodobacterales;f__Rhodobacteraceae;g__Roseibacterium	s__Roseibacterium elongatum
GCF_000597865.1	NZ_CP007452.1	100	3055036	2246262	d__Bacteria;p__Firmicutes_A;c__Clostridia;o__Peptostreptococcales;f__Peptoclostridiaceae;g__Peptoclostridium_A	s__Peptoclostridium_A acidaminophilum
GCF_000597885.1	NZ_CP004371.1	99.7	6665617	6665617	d__Bacteria;p__Bacteroidota;c__Bacteroidia;o__Cytophagales;f__Cyclobacteriaceae;g__Cesiribacter	s__Cesiribacter sp000597885
GCF_000597945.1	NZ_CP007448.1	99.84	4850874	4722762	d__Bacteria;p__Proteobacteria;c__Gammaproteobacteria;o__Enterobacterales;f__Enterobacteriaceae;g__Yersinia	s__Yersinia enterocolitica_G
GCF_000599985.1	NZ_CP007445.1	98.87	3139412	3139412	d__Bacteria;p__Proteobacteria;c__Gammaproteobacteria;o__Enterobacterales;f__Enterobacteriaceae;g__Gilliamella	s__Gilliamella apicola
GCF_000600005.1	NZ_CP007446.1	99.57	2527978	2527978	d__Bacteria;p__Proteobacteria;c__Gammaproteobacteria;o__Burkholderiales;f__Neisseriaceae;g__Snodgrassella	s__Snodgrassella alvi
GCF_000604125.1	NZ_CP003679.1	100	1139203	1139203	d__Bacteria;p__Spirochaetota;c__Spirochaetia;o__Treponematales;f__Treponemataceae;g__Treponema	s__Treponema pallidum
GCF_000612485.1	NZ_CP007494.1	98.18	3699674	3699674	d__Bacteria;p__Proteobacteria;c__Gammaproteobacteria;o__Burkholderiales;f__Burkholderiaceae;g__Bordetella	s__Bordetella holmesii
GCF_000612505.1	NZ_CP004078.1	99.8	5270569	5270569	d__Bacteria;p__Firmicutes_I;c__Bacilli_A;o__Paenibacillales;f__Paenibacillaceae;g__Paenibacillus	s__Paenibacillus sabinae
GCF_000612685.1	NZ_HG916765.1	98.99	3952818	3952818	d__Bacteria;p__Proteobacteria;c__Gammaproteobacteria;o__Burkholderiales;f__Burkholderiaceae;g__Castellaniella	s__Castellaniella defragrans
GCF_000619905.2	NZ_CP012371.1	100	3210113	3210113	d__Bacteria;p__Proteobacteria;c__Gammaproteobacteria;o__Burkholderiales;f__Nitrosomonadaceae;g__Nitrosospira	s__Nitrosospira briensis_B
GCF_000626635.1	NZ_CP007451.1	99.89	5132075	5132075	d__Bacteria;p__Bacteroidota;c__Bacteroidia;o__Bacteroidales;f__Prolixibacteraceae;g__Draconibacterium	s__Draconibacterium orientale
GCF_000626675.1	NZ_CP006842.1	99.32	3568218	3509786	d__Bacteria;p__Actinobacteriota;c__Actinobacteria;o__Mycobacteriales;f__Mycobacteriaceae;g__Corynebacterium	s__Corynebacterium glyciniphilum
GCF_000632475.1	NZ_CP007793.1	100	7391279	3064393	d__Bacteria;p__Proteobacteria;c__Alphaproteobacteria;o__Azospirillales;f__Azospirillaceae;g__Azospirillum	s__Azospirillum brasilense_B
GCF_000632845.1	NZ_CP007474.1	99.57	1148904	1148904	d__Bacteria;p__Proteobacteria;c__Alphaproteobacteria;o__Rickettsiales;f__Anaplasmataceae;g__Ehrlichia	s__Ehrlichia sp000632845
GCF_000632985.1	NZ_CP007481.1	97.47	884232	884232	d__Bacteria;p__Proteobacteria;c__Alphaproteobacteria;o__Rickettsiales;f__Anaplasmataceae;g__Neorickettsia	s__Neorickettsia helminthoeca
GCF_000635915.2	NZ_CP015614.1	100	2971535	2971535	d__Bacteria;p__Proteobacteria;c__Alphaproteobacteria;o__Caulobacterales;f__Caulobacteraceae;g__Brevundimonas	s__Brevundimonas naejangsanensis_A
GCF_000661915.1	NZ_CP007509.1	100	4833395	4725662	d__Bacteria;p__Proteobacteria;c__Gammaproteobacteria;o__Pseudomonadales;f__Pseudomonadaceae;g__Pseudomonas_A	s__Pseudomonas_A stutzeri_A
GCF_000689415.1	NZ_HG322950.1	99.98	6162905	6162905	d__Bacteria;p__Proteobacteria;c__Gammaproteobacteria;o__Pseudomonadales;f__Pseudomonadaceae;g__Pseudomonas	s__Pseudomonas knackmussii
GCF_000695095.2	NZ_CP011454.1	98.9	4716552	4716552	d__Bacteria;p__Gemmatimonadota;c__Gemmatimonadetes;o__Gemmatimonadales;f__Gemmatimonadaceae;g__Gemmatimonas	s__Gemmatimonas phototrophica
GCF_000695835.1	NZ_CP007521.1	98.97	793841	793841	d__Bacteria;p__Firmicutes;c__Bacilli;o__Mycoplasmatales;f__Metamycoplasmataceae;g__Mycoplasmopsis	s__Mycoplasmopsis californica
GCF_000696485.1	NZ_CP007757.1	99.86	4074048	4074048	d__Bacteria;p__Proteobacteria;c__Gammaproteobacteria;o__Pseudomonadales;f__Halomonadaceae;g__Halomonas	s__Halomonas campaniensis_B
GCF_000697965.2	NZ_CP015880.1	99.96	7267502	4071185	d__Bacteria;p__Proteobacteria;c__Alphaproteobacteria;o__Rhizobiales;f__Rhizobiaceae;g__Ensifer	s__Ensifer adhaerens_F
GCF_000699505.1	NZ_CP007490.1	99.42	1430433	1430433	d__Bacteria;p__Actinobacteriota;c__Actinobacteria;o__Actinomycetales;f__Microbacteriaceae;g__Rhodoluna	s__Rhodoluna lacicola
GCF_000706765.1	NZ_CP006018.1	96.31	1734546	1734546	d__Bacteria;p__Actinobacteriota;c__Actinobacteria;o__Actinomycetales;f__Bifidobacteriaceae;g__Bifidobacterium	s__Bifidobacterium indicum
GCF_000709555.1	NZ_CP006873.1	67.38	309299	309299	d__Bacteria;p__Bacteroidota;c__Bacteroidia;o__Flavobacteriales;f__Blattabacteriaceae;g__Walczuchella	s__Walczuchella monophlebidarum
GCF_000723165.1	NZ_HG322949.1	99.67	5949001	5949001	d__Bacteria;p__Proteobacteria;c__Gammaproteobacteria;o__Burkholderiales;f__Burkholderiaceae;g__Janthinobacterium	s__Janthinobacterium agaricidamnosum
GCF_000723505.1	NZ_HG934468.1	99.04	3149227	3149227	d__Bacteria;p__Bacteroidota;c__Bacteroidia;o__Bacteroidales;f__Rikenellaceae;g__Mucinivorans	s__Mucinivorans hirudinis
GCF_000724485.1	NZ_CP007739.1	99.45	3425208	3337035	d__Bacteria;p__Firmicutes;c__Bacilli;o__Bacillales;f__Bacillaceae_A;g__Bacillus_Z	s__Bacillus_Z methanolicus_A
GCF_000724605.1	NZ_CP008802.1	100	2159306	2159306	d__Bacteria;p__Actinobacteriota;c__Actinobacteria;o__Actinomycetales;f__Actinomycetaceae;g__Actinotignum	s__Actinotignum schaalii
GCF_000724625.1	NZ_CP007139.1	93.98	5231762	5231762	d__Bacteria;p__Armatimonadota;c__Fimbriimonadia;o__Fimbriimonadales;f__Fimbriimonadaceae;g__Fimbriimonas	s__Fimbriimonas ginsengisoli
GCF_000725285.1	NZ_CP007161.1	100	3841730	3821074	d__Bacteria;p__Firmicutes;c__Bacilli;o__Bacillales;f__Amphibacillaceae;g__Virgibacillus	s__Virgibacillus sp000725285
GCF_000725345.1	NZ_CP008852.1	99.91	5115410	5115410	d__Bacteria;p__Firmicutes_C;c__Negativicutes;o__Propionisporales;f__Pelosinaceae;g__Pelosinus	s__Pelosinus sp000725345
GCF_000725385.1	NZ_CP008884.1	100	4831185	4831185	d__Bacteria;p__Proteobacteria;c__Gammaproteobacteria;o__Xanthomonadales;f__Rhodanobacteraceae;g__Dyella	s__Dyella japonica_C
GCF_000725405.1	NZ_CP008889.1	100	3113642	3029021	d__Bacteria;p__Actinobacteriota;c__Actinobacteria;o__Actinomycetales;f__Dermatophilaceae;g__Dermacoccus	s__Dermacoccus nishinomiyaensis
GCF_000730245.1	NZ_CP004403.1	98.9	1615277	1615277	d__Bacteria;p__Proteobacteria;c__Alphaproteobacteria;o__Rickettsiales;f__Midichloriaceae;g__Jidaibacter	s__Jidaibacter sp000730245
GCF_000730385.1	NZ_CP008849.1	99.59	4308833	4308833	d__Bacteria;p__Proteobacteria;c__Gammaproteobacteria;o__Enterobacterales;f__Alteromonadaceae;g__Alteromonas	s__Alteromonas australica
GCF_000730425.1	NZ_CP008896.1	98.64	6064456	6064456	d__Bacteria;p__Proteobacteria;c__Gammaproteobacteria;o__Pseudomonadales;f__Pseudomonadaceae;g__Pseudomonas_E	s__Pseudomonas_E fluorescens_X
GCF_000731315.1	NZ_HG938353.1	99	6455027	4647962	d__Bacteria;p__Proteobacteria;c__Alphaproteobacteria;o__Rhizobiales;f__Rhizobiaceae;g__Neorhizobium	s__Neorhizobium galegae
GCF_000732925.1	NZ_CP008953.1	100	9053857	8961318	d__Bacteria;p__Actinobacteriota;c__Actinobacteria;o__Mycobacteriales;f__Pseudonocardiaceae;g__Amycolatopsis	s__Amycolatopsis japonica
GCF_000732945.1	NZ_CP008944.1	99.45	2359448	2311380	d__Bacteria;p__Actinobacteriota;c__Actinobacteria;o__Mycobacteriales;f__Mycobacteriaceae;g__Corynebacterium	s__Corynebacterium atypicum
GCF_000734015.1	NZ_CP008796.1	99.17	1764045	1764045	d__Bacteria;p__Desulfobacterota;c__Thermodesulfobacteria;o__Thermodesulfobacteriales;f__Thermodesulfobacteriaceae;g__Thermodesulfobacterium	s__Thermodesulfobacterium commune
GCF_000734895.2	NZ_CP011382.1	100	6420126	6283267	d__Bacteria;p__Cyanobacteria;c__Cyanobacteriia;o__Cyanobacteriales;f__Nostocaceae;g__Calothrix	s__Calothrix sp000734895
GCF_000734975.2	NZ_CP011052.1	100	5168360	4649248	d__Bacteria;p__Proteobacteria;c__Gammaproteobacteria;o__Pseudomonadales;f__Halomonadaceae;g__Halomonas	s__Halomonas sp000734975
GCF_000736415.1	NZ_CP009043.1	99.88	1754638	1684608	d__Bacteria;p__Campylobacterota;c__Campylobacteria;o__Campylobacterales;f__Campylobacteraceae;g__Campylobacter	s__Campylobacter iguaniorum
GCF_000737325.1	NZ_CP011125.1	96.56	10327335	10327335	d__Bacteria;p__Myxococcota;c__Polyangia;o__Polyangiales;f__Sandaracinaceae;g__Sandaracinus	s__Sandaracinus amylolyticus
GCF_000737515.1	NZ_CP006587.1	100	5010594	4870994	d__Bacteria;p__Bacteroidota;c__Bacteroidia;o__Cytophagales;f__Hymenobacteraceae;g__Hymenobacter	s__Hymenobacter sp000737515
GCF_000737535.1	NZ_CP006269.1	99.46	2789000	2789000	d__Bacteria;p__Cyanobacteria;c__Cyanobacteriia;o__Synechococcales;f__Cyanobiaceae;g__Synechococcus_C	s__Synechococcus_C sp000737535
GCF_000737575.1	NZ_CP006270.1	99.37	2585813	2585813	d__Bacteria;p__Cyanobacteria;c__Cyanobacteriia;o__Synechococcales;f__Cyanobiaceae;g__Synechococcus_C	s__Synechococcus_C sp000737575
GCF_000737595.1	NZ_CP006271.1	100	2572069	2572069	d__Bacteria;p__Cyanobacteria;c__Cyanobacteriia;o__Synechococcales;f__Cyanobiaceae;g__Synechococcus_C	s__Synechococcus_C sp000737595
GCF_000739085.1	NZ_CP009110.1	100	7237391	7237391	d__Bacteria;p__Actinobacteriota;c__Actinobacteria;o__Mycobacteriales;f__Pseudonocardiaceae;g__Amycolatopsis	s__Amycolatopsis methanolica
GCF_000739375.1	NZ_CP006704.1	100	6062703	6062703	d__Bacteria;p__Proteobacteria;c__Gammaproteobacteria;o__Burkholderiales;f__Burkholderiaceae;g__Comamonas_B	s__Comamonas_B testosteroni_B
GCF_000739435.1	NZ_CP009159.1	99.89	2501598	2501598	d__Bacteria;p__Proteobacteria;c__Gammaproteobacteria;o__Enterobacterales;f__Pasteurellaceae;g__Actinobacillus	s__Actinobacillus suis
GCF_000739455.1	NZ_CP009211.1	99.78	2565321	2565321	d__Bacteria;p__Actinobacteriota;c__Actinobacteria;o__Mycobacteriales;f__Mycobacteriaceae;g__Corynebacterium	s__Corynebacterium imitans
GCF_000742835.1	NZ_CP008941.1	83.52	2485110	2470036	d__Bacteria;p__Proteobacteria;c__Alphaproteobacteria;o__Paracaedibacterales;f__Paracaedibacteraceae;g__Paracaedibacter	s__Paracaedibacter acanthamoebae
GCF_000743945.1	NZ_CP009238.1	98.01	1959069	1959069	d__Bacteria;p__Proteobacteria;c__Gammaproteobacteria;o__Burkholderiales;f__Burkholderiaceae;g__Basilea	s__Basilea psittacipulmonis
GCF_000746525.1	NZ_CP009048.1	99.68	5764622	5764622	d__Bacteria;p__Proteobacteria;c__Gammaproteobacteria;o__Pseudomonadales;f__Pseudomonadaceae;g__Pseudomonas_E	s__Pseudomonas_E alkylphenolica
GCF_000746585.1	NZ_CP009217.1	99.05	1917564	1851238	d__Bacteria;p__Proteobacteria;c__Alphaproteobacteria;o__Rickettsiales;f__Arcanobacteraceae;g__Ac37b	s__Ac37b sp000746585
GCF_000747315.1	NZ_CP009215.1	98.64	2328278	2279990	d__Bacteria;p__Actinobacteriota;c__Actinobacteria;o__Mycobacteriales;f__Mycobacteriaceae;g__Corynebacterium	s__Corynebacterium ureicelerivorans
GCF_000747345.1	NZ_CP008855.1	98.83	3422674	3422674	d__Bacteria;p__Firmicutes;c__Bacilli;o__Bacillales;f__Bacillaceae_A;g__Bacillus_W	s__Bacillus_W sp000747345
GCF_000747525.1	NZ_CP009278.1	100	5329010	5329010	d__Bacteria;p__Bacteroidota;c__Bacteroidia;o__Sphingobacteriales;f__Sphingobacteriaceae;g__Sphingobacterium	s__Sphingobacterium sp000747525
GCF_000750535.1	NZ_CP009224.1	97.68	1390397	1390397	d__Bacteria;p__Firmicutes;c__Bacilli;o__Lactobacillales;f__Lactobacillaceae;g__Weissella	s__Weissella ceti
GCF_000754265.1	NZ_CP008985.1	99.58	759425	759425	d__Bacteria;p__Proteobacteria;c__Gammaproteobacteria;o__Enterobacterales;f__Enterobacteriaceae;g__Baumannia	s__Baumannia cicadellinicola_B
GCF_000754275.1	NZ_CP008918.1	99.09	2271840	2271840	d__Bacteria;p__Proteobacteria;c__Gammaproteobacteria;o__Enterobacterales;f__Pasteurellaceae;g__Pasteurella	s__Pasteurella multocida
GCF_000755145.1	NZ_CP009228.1	98.39	2800562	2796913	d__Bacteria;p__Spirochaetota;c__Spirochaetia;o__Treponematales;f__Treponemataceae;g__Treponema_B	s__Treponema_B putidum
GCF_000755185.1	NZ_CP008913.1	100	2471920	2471920	d__Bacteria;p__Actinobacteriota;c__Actinobacteria;o__Mycobacteriales;f__Mycobacteriaceae;g__Corynebacterium	s__Corynebacterium sp000755185
GCF_000755705.1	NZ_CP009415.1	100	1878735	1878735	d__Bacteria;p__Firmicutes;c__Bacilli;o__Izemoplasmatales;f__Izemoplasmataceae;g__Izemoplasma_B	s__Izemoplasma_B sp000755705
GCF_000756615.1	NZ_CP009288.1	99.8	6053498	6038347	d__Bacteria;p__Firmicutes_I;c__Bacilli_A;o__Paenibacillales;f__Paenibacillaceae;g__Paenibacillus	s__Paenibacillus durus
GCF_000757825.1	NZ_CP009451.1	99.99	4876443	4876443	d__Bacteria;p__Proteobacteria;c__Gammaproteobacteria;o__Enterobacterales;f__Enterobacteriaceae;g__Cedecea	s__Cedecea neteri_A
GCF_000757845.1	NZ_CP007753.1	99.73	1780061	1780061	d__Bacteria;p__Cyanobacteria;c__Cyanobacteriia;o__Synechococcales;f__Cyanobiaceae;g__Prochlorococcus_A	s__Prochlorococcus_A sp000757845
GCF_000757865.1	NZ_CP007754.1	99.18	1929203	1929203	d__Bacteria;p__Cyanobacteria;c__Cyanobacteriia;o__Synechococcales;f__Cyanobiaceae;g__Prochlorococcus_B	s__Prochlorococcus_B sp000757865
GCF_000758305.1	NZ_CP009458.1	99.99	4965436	4965436	d__Bacteria;p__Proteobacteria;c__Gammaproteobacteria;o__Enterobacterales;f__Enterobacteriaceae;g__Cedecea	s__Cedecea neteri_C
GCF_000758325.1	NZ_CP009459.1	99.82	4659311	4659311	d__Bacteria;p__Proteobacteria;c__Gammaproteobacteria;o__Enterobacterales;f__Enterobacteriaceae;g__Cedecea	s__Cedecea neteri_B
GCF_000758525.1	NZ_CP009241.1	99.61	7692748	7692748	d__Bacteria;p__Firmicutes_I;c__Bacilli_A;o__Paenibacillales;f__Paenibacillaceae;g__Paenibacillus	s__Paenibacillus sp000758525
GCF_000758545.1	NZ_CP009279.1	99.85	6765883	6765883	d__Bacteria;p__Firmicutes_I;c__Bacilli_A;o__Paenibacillales;f__Paenibacillaceae;g__Paenibacillus	s__Paenibacillus sp000758545
GCF_000758565.1	NZ_CP009280.1	99.75	8423054	8423054	d__Bacteria;p__Firmicutes_I;c__Bacilli_A;o__Paenibacillales;f__Paenibacillaceae;g__Paenibacillus	s__Paenibacillus sp000758565
GCF_000758585.1	NZ_CP009281.1	99.85	6787172	6787172	d__Bacteria;p__Firmicutes_I;c__Bacilli_A;o__Paenibacillales;f__Paenibacillaceae;g__Paenibacillus	s__Paenibacillus sp000758585
GCF_000758605.1	NZ_CP009282.1	99.75	7718525	7718525	d__Bacteria;p__Firmicutes_I;c__Bacilli_A;o__Paenibacillales;f__Paenibacillaceae;g__Paenibacillus	s__Paenibacillus sp000758605
GCF_000758625.1	NZ_CP009283.1	99.8	7288921	7288921	d__Bacteria;p__Firmicutes_I;c__Bacilli_A;o__Paenibacillales;f__Paenibacillaceae;g__Paenibacillus	s__Paenibacillus sp000758625
GCF_000758665.1	NZ_CP009285.1	99.75	8156808	8156808	d__Bacteria;p__Firmicutes_I;c__Bacilli_A;o__Paenibacillales;f__Paenibacillaceae;g__Paenibacillus	s__Paenibacillus borealis
GCF_000758685.1	NZ_CP009286.1	99.8	5658798	5658798	d__Bacteria;p__Firmicutes_I;c__Bacilli_A;o__Paenibacillales;f__Paenibacillaceae;g__Paenibacillus	s__Paenibacillus stellifer
GCF_000758705.1	NZ_CP009287.1	99.8	7166464	7166464	d__Bacteria;p__Firmicutes_I;c__Bacilli_A;o__Paenibacillales;f__Paenibacillaceae;g__Paenibacillus	s__Paenibacillus graminis
GCF_000758725.1	NZ_CP009428.1	99.85	6812473	6812473	d__Bacteria;p__Firmicutes_I;c__Bacilli_A;o__Paenibacillales;f__Paenibacillaceae;g__Paenibacillus	s__Paenibacillus odorifer
GCF_000759475.1	NZ_CP009454.1	99.92	4327607	4327607	d__Bacteria;p__Proteobacteria;c__Gammaproteobacteria;o__Enterobacterales;f__Enterobacteriaceae;g__Pantoea	s__Pantoea rwandensis_B
GCF_000759535.1	NZ_CP009455.1	99.75	4780403	4780403	d__Bacteria;p__Proteobacteria;c__Gammaproteobacteria;o__Pseudomonadales;f__Pseudomonadaceae;g__Pseudomonas_E	s__Pseudomonas_E cremoricolorata_A
GCF_000761155.1	NZ_CP009533.1	98.38	4688635	4688635	d__Bacteria;p__Proteobacteria;c__Gammaproteobacteria;o__Pseudomonadales;f__Pseudomonadaceae;g__Pseudomonas_E	s__Pseudomonas_E rhizosphaerae
GCF_000761215.1	NZ_CP009438.1	100	7623774	7453200	d__Bacteria;p__Actinobacteriota;c__Actinobacteria;o__Streptomycetales;f__Streptomycetaceae;g__Streptomyces	s__Streptomyces glaucescens
GCF_000763495.1	NZ_CP009576.1	99.45	3045035	3045035	d__Bacteria;p__Firmicutes;c__Bacilli;o__Lactobacillales;f__Listeriaceae;g__Listeria	s__Listeria londoniensis
GCF_000763575.1	NZ_CP009170.1	98.93	2397824	2397824	d__Bacteria;p__Firmicutes_A;c__Thermoanaerobacteria;o__Thermoanaerobacterales;f__Thermoanaerobacteraceae;g__Thermoanaerobacter	s__Thermoanaerobacter kivui
GCF_000764535.1	NZ_CP009571.1	99.66	4061902	3859099	d__Bacteria;p__Proteobacteria;c__Alphaproteobacteria;o__Sphingomonadales;f__Sphingomonadaceae;g__Sphingomonas	s__Sphingomonas taxi_C
GCF_000764555.1	NZ_CP009574.1	98.71	2015987	2015987	d__Bacteria;p__Proteobacteria;c__Gammaproteobacteria;o__Francisellales;f__Francisellaceae;g__Francisella	s__Francisella sp000764555
GCF_000767055.1	NZ_CP006764.1	99.67	2698995	2671798	d__Bacteria;p__Actinobacteriota;c__Actinobacteria;o__Mycobacteriales;f__Mycobacteriaceae;g__Corynebacterium	s__Corynebacterium doosanense
GCF_000767465.1	NZ_CP009291.1	99.93	5457578	3979506	d__Bacteria;p__Proteobacteria;c__Alphaproteobacteria;o__Sphingomonadales;f__Sphingomonadaceae;g__Novosphingobium	s__Novosphingobium pentaromativorans
GCF_000767615.3	NZ_CP009553.3	98.68	5389285	5389285	d__Bacteria;p__Proteobacteria;c__Gammaproteobacteria;o__Burkholderiales;f__Burkholderiaceae;g__Pandoraea	s__Pandoraea pnomenusa
GCF_000772045.1	NZ_CP009754.1	100	8274043	8274043	d__Bacteria;p__Actinobacteriota;c__Actinobacteria;o__Streptomycetales;f__Streptomycetaceae;g__Streptomyces	s__Streptomyces sp000772045
GCF_000772085.1	NZ_CP009755.1	99.49	3443800	3443800	d__Bacteria;p__Actinobacteriota;c__Actinobacteria;o__Actinomycetales;f__Microbacteriaceae;g__Curtobacterium	s__Curtobacterium sp000772085
GCF_000775995.1	NZ_CP009227.1	100	2708067	2708067	d__Bacteria;p__Spirochaetota;c__Spirochaetia;o__Treponematales;f__Treponemataceae;g__Treponema_A	s__Treponema_A sp000775995
GCF_000785105.2	NZ_CP018906.1	99.38	2095860	2095860	d__Bacteria;p__Firmicutes;c__Bacilli;o__Lactobacillales;f__Lactobacillaceae;g__Lactobacillus_G	s__Lactobacillus_G curieae
GCF_000785515.1	NZ_CP009913.1	99.34	2188923	2188923	d__Bacteria;p__Firmicutes;c__Bacilli;o__Lactobacillales;f__Streptococcaceae;g__Streptococcus	s__Streptococcus salivarius
GCF_000785535.1	NZ_CP007595.1	99.31	4593579	4593579	d__Bacteria;p__Actinobacteriota;c__Actinobacteria;o__Actinomycetales;f__Micrococcaceae;g__Arthrobacter_A	s__Arthrobacter_A sp000785535
GCF_000785555.1	NZ_CP009129.1	99.34	3199864	3196500	d__Bacteria;p__Firmicutes;c__Bacilli;o__Bacillales_A;f__Planococcaceae;g__Planococcus_A	s__Planococcus_A sp000785555
GCF_000786695.1	NZ_CP009962.1	99.92	5644972	5603532	d__Bacteria;p__Proteobacteria;c__Gammaproteobacteria;o__Burkholderiales;f__Burkholderiaceae;g__Collimonas	s__Collimonas arenae_A
GCF_000789395.1	NZ_CP006905.1	99.19	3338630	3153266	d__Bacteria;p__Firmicutes_A;c__Clostridia;o__Clostridiales;f__Clostridiaceae;g__Clostridium	s__Clostridium baratii
GCF_000800255.1	NZ_CP009747.1	99.61	5087619	5087619	d__Bacteria;p__Proteobacteria;c__Gammaproteobacteria;o__Pseudomonadales;f__Pseudomonadaceae;g__Pseudomonas_E	s__Pseudomonas_E parafulva_A
GCF_000800395.1	NZ_CP010028.1	96.49	3531443	3531443	d__Bacteria;p__Deinococcota;c__Deinococci;o__Deinococcales;f__Deinococcaceae;g__Deinococcus	s__Deinococcus swuensis
GCF_000800455.1	NZ_CP007456.1	100	2370978	2370978	d__Bacteria;p__Actinobacteriota;c__Actinobacteria;o__Actinomycetales;f__Bifidobacteriaceae;g__Bifidobacterium	s__Bifidobacterium kashiwanohense_A
GCF_000801145.1	NZ_CP007715.1	99.81	2431533	2431533	d__Bacteria;p__Proteobacteria;c__Gammaproteobacteria;o__Enterobacterales;f__Pasteurellaceae;g__Actinobacillus	s__Actinobacillus equuli
GCF_000801295.1	NZ_AP012978.1	98.9	2597759	2597759	d__Bacteria;p__Proteobacteria;c__Gammaproteobacteria;o__Chromatiales;f__Sedimenticolaceae;g__MONJU	s__MONJU sp000801295
GCF_000801315.1	NZ_CP010054.1	100	4360029	3874646	d__Bacteria;p__Bacteroidota;c__Bacteroidia;o__Cytophagales;f__Hymenobacteraceae;g__Hymenobacter	s__Hymenobacter sp000801315
GCF_000802245.2	NZ_CP021080.1	99.46	7346075	7346075	d__Bacteria;p__Actinobacteriota;c__Actinobacteria;o__Streptomycetales;f__Streptomycetaceae;g__Streptomyces	s__Streptomyces pluripotens
GCF_000803625.1	NZ_CP007496.1	65.38	705138	705138	d__Bacteria;p__Patescibacteria;c__Saccharimonadia;o__Saccharimonadales;f__Saccharimonadaceae;g__TM7x	s__TM7x sp000803625
GCF_000803645.1	NZ_CP009122.1	99.64	5202172	4993584	d__Bacteria;p__Proteobacteria;c__Alphaproteobacteria;o__Sphingomonadales;f__Sphingomonadaceae;g__Sphingopyxis	s__Sphingopyxis fribergensis
GCF_000807255.1	NZ_CP009268.1	100	4352101	4352101	d__Bacteria;p__Firmicutes_A;c__Clostridia;o__Clostridiales;f__Clostridiaceae;g__Clostridium_I	s__Clostridium_I pasteurianum
GCF_000807275.1	NZ_CP009056.1	98.31	2692351	2692351	d__Bacteria;p__Proteobacteria;c__Gammaproteobacteria;o__Enterobacterales;f__Enterobacteriaceae;g__Frischella	s__Frischella perrara
GCF_000807675.2	NZ_CP019962.1	99.3	4422837	4422837	d__Bacteria;p__Firmicutes_A;c__Clostridia;o__Eubacteriales;f__Eubacteriaceae;g__Eubacterium	s__Eubacterium limosum
GCF_000812665.2	NZ_CP014327.1	98.85	4376120	4329554	d__Bacteria;p__Proteobacteria;c__Alphaproteobacteria;o__Rhodobacterales;f__Rhodobacteraceae;g__Halocynthiibacter_B	s__Halocynthiibacter_B arcticus
GCF_000814825.1	NZ_CP009302.1	100	1967093	1967093	d__Bacteria;p__Actinobacteriota;c__Coriobacteriia;o__Coriobacteriales;f__Eggerthellaceae;g__DNF00809	s__DNF00809 sp000814825
GCF_000814845.2	NZ_CP010431.2	99.5	5742997	5742997	d__Bacteria;p__Proteobacteria;c__Gammaproteobacteria;o__Burkholderiales;f__Burkholderiaceae;g__Pandoraea	s__Pandoraea sputorum
GCF_000815025.1	NZ_CP007541.1	80.14	656901	656901	d__Bacteria;p__Proteobacteria;c__Gammaproteobacteria;o__Coxiellales;f__Coxiellaceae;g__Coxiella	s__Coxiella sp000815025
GCF_000815065.1	NZ_CP007585.1	98.16	778866	778866	d__Bacteria;p__Firmicutes;c__Bacilli;o__Mycoplasmatales;f__Metamycoplasmataceae;g__Mesomycoplasma	s__Mesomycoplasma flocculare
GCF_000815105.2	NZ_CP010310.2	99.55	5867621	5867621	d__Bacteria;p__Proteobacteria;c__Gammaproteobacteria;o__Burkholderiales;f__Burkholderiaceae;g__Pandoraea	s__Pandoraea pulmonicola
GCF_000815185.1	NZ_CP010409.1	99.17	5006106	4497453	d__Bacteria;p__Proteobacteria;c__Gammaproteobacteria;o__Xanthomonadales;f__Xanthomonadaceae;g__Xanthomonas_A	s__Xanthomonas_A sacchari_A
GCF_000815225.1	NZ_CP010427.1	96.63	1661527	1658482	d__Bacteria;p__Proteobacteria;c__Gammaproteobacteria;o__Francisellales;f__Francisellaceae;g__Allofrancisella	s__Allofrancisella guangzhouensis
GCF_000816045.1	NZ_CP006929.1	99.89	4532364	4532364	d__Bacteria;p__Proteobacteria;c__Gammaproteobacteria;o__Enterobacterales;f__Enterobacteriaceae;g__Dickeya	s__Dickeya zeae_A
GCF_000816065.1	NZ_CP007003.1	100	2272494	2272494	d__Bacteria;p__Actinobacteriota;c__Actinobacteria;o__Actinomycetales;f__Actinomycetaceae;g__Trueperella	s__Trueperella pyogenes
GCF_000816085.1	NZ_CP008747.1	99.43	2472129	2472129	d__Bacteria;p__Firmicutes;c__Bacilli;o__Staphylococcales;f__Staphylococcaceae;g__Staphylococcus	s__Staphylococcus hyicus
GCF_000816145.1	NZ_CP007141.1	100	2165416	2165416	d__Bacteria;p__Thermotogota;c__Thermotogae;o__Thermotogales;f__Thermotogaceae;g__Pseudothermotoga_A	s__Pseudothermotoga_A hypogea
GCF_000816185.1	NZ_CP007770.1	98.78	1465081	1465081	d__Bacteria;p__Campylobacterota;c__Campylobacteria;o__Campylobacterales;f__Campylobacteraceae;g__Campylobacter_D	s__Campylobacter_D insulaenigrae
GCF_000816225.1	NZ_CP007771.1	98.78	1502102	1502102	d__Bacteria;p__Campylobacterota;c__Campylobacteria;o__Campylobacterales;f__Campylobacteraceae;g__Campylobacter_D	s__Campylobacter_D lari_B
GCF_000816245.1	NZ_CP007769.1	98.78	1557536	1557536	d__Bacteria;p__Campylobacterota;c__Campylobacteria;o__Campylobacterales;f__Campylobacteraceae;g__Campylobacter_D	s__Campylobacter_D sp000816245
GCF_000816305.1	NZ_CP007773.1	98.78	1852995	1852995	d__Bacteria;p__Campylobacterota;c__Campylobacteria;o__Campylobacterales;f__Campylobacteraceae;g__Campylobacter_D	s__Campylobacter_D subantarcticus
GCF_000816345.1	NZ_CP007774.1	98.78	1517949	1517949	d__Bacteria;p__Campylobacterota;c__Campylobacteria;o__Campylobacterales;f__Campylobacteraceae;g__Campylobacter_D	s__Campylobacter_D volucris
GCF_000816785.1	NZ_CP007766.1	98.78	1762793	1711369	d__Bacteria;p__Campylobacterota;c__Campylobacteria;o__Campylobacterales;f__Campylobacteraceae;g__Campylobacter_D	s__Campylobacter_D peloridis
GCF_000817955.1	NZ_CP009788.1	99.84	3618700	3618700	d__Bacteria;p__Desulfuromonadota;c__Desulfuromonadia;o__Geobacterales;f__Geobacteraceae;g__Geobacter	s__Geobacter pickeringii
GCF_000817975.1	NZ_CP010415.1	98.77	5192286	4591803	d__Bacteria;p__Proteobacteria;c__Gammaproteobacteria;o__Pseudomonadales;f__Pseudomonadaceae;g__Azotobacter	s__Azotobacter chroococcum
GCF_000818015.1	NZ_CP007511.1	99.94	4383480	4383480	d__Bacteria;p__Proteobacteria;c__Gammaproteobacteria;o__Pseudomonadales;f__Pseudomonadaceae;g__Pseudomonas_A	s__Pseudomonas_A balearica
GCF_000818095.1	NZ_CP009416.1	99.12	4119509	3516439	d__Bacteria;p__Firmicutes;c__Bacilli;o__Bacillales;f__Jeotgalibacillaceae;g__Jeotgalibacillus	s__Jeotgalibacillus malaysiensis
GCF_000819445.1	NZ_CP005286.1	99.67	2681312	2681312	d__Bacteria;p__Actinobacteriota;c__Actinobacteria;o__Mycobacteriales;f__Mycobacteriaceae;g__Corynebacterium	s__Corynebacterium humireducens
GCF_000819565.1	NZ_CP004393.1	99.55	4969388	4529105	d__Bacteria;p__Proteobacteria;c__Alphaproteobacteria;o__Rhodobacterales;f__Rhodobacteraceae;g__Celeribacter	s__Celeribacter indicus
GCF_000827005.1	NZ_CP010519.1	99.89	8384669	8384669	d__Bacteria;p__Actinobacteriota;c__Actinobacteria;o__Streptomycetales;f__Streptomycetaceae;g__Streptomyces	s__Streptomyces albus_F
GCF_000827125.1	NZ_CP010311.1	99.35	3717645	3475523	d__Bacteria;p__Desulfuromonadota;c__Desulfuromonadia;o__Desulfuromonadales;f__Geoalkalibacteraceae;g__Geoalkalibacter_A	s__Geoalkalibacter_A subterraneus
GCF_000827935.1	NZ_CP010520.1	99.19	3611897	3611897	d__Bacteria;p__Firmicutes_A;c__Clostridia;o__Clostridiales;f__Clostridiaceae;g__Clostridium	s__Clostridium botulinum_A
GCF_000828055.2	NZ_CP010523.2	100	5521203	5521203	d__Bacteria;p__Proteobacteria;c__Gammaproteobacteria;o__Enterobacterales;f__Enterobacteriaceae;g__Klebsiella	s__Klebsiella variicola
GCF_000828475.1	NZ_AP014648.1	97.78	3424964	3424964	d__Bacteria;p__Proteobacteria;c__Alphaproteobacteria;o__Rhizobiales;f__Methyloligellaceae;g__Methyloceanibacter	s__Methyloceanibacter caenitepidi
GCF_000828515.1	NZ_AP010872.1	98.75	754729	745590	d__Bacteria;p__Proteobacteria;c__Gammaproteobacteria;o__Enterobacterales;f__Enterobacteriaceae;g__Ishikawaella	s__Ishikawaella capsulata
GCF_000828615.1	NZ_AP012273.1	98.78	3153637	3129662	d__Bacteria;p__Proteobacteria;c__Gammaproteobacteria;o__Chromatiales;f__Sedimenticolaceae;g__Thiolapillus	s__Thiolapillus brandeum
GCF_000828635.1	NZ_AP012547.1	97.67	3802648	3802648	d__Bacteria;p__Proteobacteria;c__Gammaproteobacteria;o__Burkholderiales;f__Rhodocyclaceae;g__Sulfuritalea	s__Sulfuritalea hydrogenivorans
GCF_000828655.1	NZ_AP014509.1	96.55	2014912	2014912	d__Bacteria;p__Thermotogota;c__Thermotogae;o__Thermotogales;f__Thermotogaceae;g__Pseudothermotoga_A	s__Pseudothermotoga_A caldifontis
GCF_000828675.1	NZ_AP014510.1	99.84	2187612	2187612	d__Bacteria;p__Thermotogota;c__Thermotogae;o__Thermotogales;f__Thermotogaceae;g__Pseudothermotoga_B	s__Pseudothermotoga_B profunda
GCF_000828715.1	NZ_AP014583.1	99.67	3811479	3811479	d__Bacteria;p__Bacteroidota;c__Bacteroidia;o__Flavobacteriales;f__Flavobacteriaceae;g__Winogradskyella	s__Winogradskyella sp000828715
GCF_000828815.1	NZ_AP014521.1	100	708439	708439	d__Bacteria;p__Proteobacteria;c__Gammaproteobacteria;o__Enterobacterales;f__Enterobacteriaceae;g__Tachikawaea	s__Tachikawaea gelatinosa
GCF_000828835.1	NZ_AP014633.1	94.52	4810005	4810005	d__Bacteria;p__Proteobacteria;c__Gammaproteobacteria;o__Beggiatoales;f__Beggiatoaceae;g__Thioploca	s__Thioploca ingrica
GCF_000828855.1	NZ_AP014631.1	98.12	693241	693241	d__Bacteria;p__Firmicutes;c__Bacilli;o__Mycoplasmatales;f__Metamycoplasmataceae;g__Metamycoplasma	s__Metamycoplasma canadense
GCF_000828895.1	NZ_AP014568.1	98.21	2574013	2574013	d__Bacteria;p__Proteobacteria;c__Gammaproteobacteria;o__Burkholderiales;f__Burkholderiaceae;g__32-67-11	s__32-67-11 sp000828895
GCF_000828915.1	NZ_AP014569.1	97.86	2623236	2606868	d__Bacteria;p__Proteobacteria;c__Gammaproteobacteria;o__Burkholderiales;f__Burkholderiaceae;g__32-67-11	s__32-67-11 sp000828915
GCF_000828975.1	NZ_AP014683.1	99.38	3276549	3276549	d__Bacteria;p__Proteobacteria;c__Gammaproteobacteria;o__Burkholderiales;f__Burkholderiaceae;g__GJ-E10	s__GJ-E10 sp000828975
GCF_000829035.1	NZ_AP012541.1	99.46	3017804	2995875	d__Bacteria;p__Firmicutes;c__Bacilli;o__Lactobacillales;f__Lactobacillaceae;g__Lactobacillus_C	s__Lactobacillus_C paracasei
GCF_000829055.1	NZ_AP012544.1	97.74	2952961	2924929	d__Bacteria;p__Firmicutes;c__Bacilli;o__Lactobacillales;f__Lactobacillaceae;g__Lactobacillus_C	s__Lactobacillus_C casei
GCF_000829155.1	NZ_AP013293.1	54.2	285352	285352	d__Bacteria;p__Bacteroidota;c__Bacteroidia;o__Flavobacteriales;f__Blattabacteriaceae;g__Sulcia	s__Sulcia muelleri_A
GCF_000829195.1	NZ_AP013294.1	97.35	3594618	3594618	d__Bacteria;p__Firmicutes;c__Bacilli;o__Bacillales_A;f__Planococcaceae;g__OxB-1	s__OxB-1 sp000829195
GCF_000829235.1	NZ_AP012549.1	84.86	2794318	2794318	d__Bacteria;p__Cyanobacteria;c__Cyanobacteriia;o__Cyanobacteriales;f__Microcystaceae;g__Cyanothece_A	s__Cyanothece_A sp000829235
GCF_000829315.1	NZ_AP013028.1	100	1250060	1250060	d__Bacteria;p__Proteobacteria;c__Alphaproteobacteria;o__Rickettsiales;f__Anaplasmataceae;g__Wolbachia	s__Wolbachia sp000829315
GCF_000829375.1	NZ_AP014624.1	100	5503743	5503743	d__Bacteria;p__Bacteroidota;c__Bacteroidia;o__Flavobacteriales;f__Weeksellaceae;g__Chryseobacterium	s__Chryseobacterium sp000829375
GCF_000829395.1	NZ_AP014680.1	99.46	2400586	2277985	d__Bacteria;p__Firmicutes;c__Bacilli;o__Lactobacillales;f__Lactobacillaceae;g__Lactobacillus_H	s__Lactobacillus_H hokkaidonensis
GCF_000829415.1	NZ_AP014637.1	100	6332373	6332373	d__Bacteria;p__Proteobacteria;c__Gammaproteobacteria;o__Pseudomonadales;f__Pseudomonadaceae;g__Pseudomonas_E	s__Pseudomonas_E sp000829415
GCF_000830005.1	NZ_CP010407.1	99.84	9153777	8867142	d__Bacteria;p__Actinobacteriota;c__Actinobacteria;o__Streptomycetales;f__Streptomycetaceae;g__Streptomyces	s__Streptomyces vietnamensis
GCF_000830885.1	NZ_CP006951.1	99.01	1362151	1362151	d__Bacteria;p__Chloroflexota;c__Dehalococcoidia;o__Dehalococcoidales;f__Dehalococcoidaceae;g__Dehalococcoides	s__Dehalococcoides mccartyi_B
GCF_000830985.1	NZ_CP007151.1	94.58	3975896	3975896	d__Bacteria;p__Proteobacteria;c__Gammaproteobacteria;o__Pseudomonadales;f__Oleiphilaceae;g__Marinobacter	s__Marinobacter similis
GCF_000831005.1	NZ_CP007152.1	95.48	4616532	4616532	d__Bacteria;p__Proteobacteria;c__Gammaproteobacteria;o__Pseudomonadales;f__Oleiphilaceae;g__Marinobacter	s__Marinobacter salarius
GCF_000831645.3	NZ_CP012559.1	99.48	2790548	2790548	d__Bacteria;p__Firmicutes;c__Bacilli;o__Lactobacillales;f__Lactobacillaceae;g__Lactobacillus_K	s__Lactobacillus_K heilongjiangensis
GCF_000832605.1	NZ_CP009692.1	99.34	5637053	5255868	d__Bacteria;p__Firmicutes;c__Bacilli;o__Bacillales;f__Bacillaceae_G;g__Bacillus_A	s__Bacillus_A mycoides
GCF_000832805.1	NZ_CP009590.1	99.23	5720073	5267792	d__Bacteria;p__Firmicutes;c__Bacilli;o__Bacillales;f__Bacillaceae_G;g__Bacillus_A	s__Bacillus_A cereus_T
GCF_000832985.1	NZ_CP009920.1	99.43	5746640	5343114	d__Bacteria;p__Firmicutes;c__Bacilli;o__Bacillales;f__Bacillaceae_H;g__Bacillus_C	s__Bacillus_C megaterium
GCF_000833025.1	NZ_CP010817.1	99.65	4064534	4064534	d__Bacteria;p__Bacteroidota;c__Bacteroidia;o__Flavobacteriales;f__Flavobacteriaceae;g__Myroides	s__Myroides profundi
GCF_000833575.1	NZ_CP010827.1	99.78	2830519	2830519	d__Bacteria;p__Actinobacteriota;c__Actinobacteria;o__Mycobacteriales;f__Mycobacteriaceae;g__Corynebacterium	s__Corynebacterium singulare
GCF_000834865.1	NZ_CP009997.1	99.95	4496569	4496569	d__Bacteria;p__Proteobacteria;c__Gammaproteobacteria;o__Enterobacterales;f__Enterobacteriaceae;g__Yersinia	s__Yersinia kristensenii_B
GCF_000835165.1	NZ_CP007790.1	99.89	2729219	2607268	d__Bacteria;p__Actinobacteriota;c__Actinobacteria;o__Mycobacteriales;f__Mycobacteriaceae;g__Corynebacterium	s__Corynebacterium marinum
GCF_000875755.1	NZ_CP007520.1	99.25	895051	895051	d__Bacteria;p__Firmicutes;c__Bacilli;o__Mycoplasmatales;f__Mycoplasmataceae;g__Mycoplasma	s__Mycoplasma yeatsii
GCF_000931445.1	NZ_CP010849.1	99.57	7762396	7762396	d__Bacteria;p__Actinobacteriota;c__Actinobacteria;o__Streptomycetales;f__Streptomycetaceae;g__Streptomyces	s__Streptomyces cyaneogriseus
GCF_000931465.1	NZ_CP010892.1	100	6986763	6929263	d__Bacteria;p__Proteobacteria;c__Gammaproteobacteria;o__Pseudomonadales;f__Pseudomonadaceae;g__Pseudomonas_E	s__Pseudomonas_E sp000931465
GCF_000934605.2	NZ_CP010897.2	99.55	5736282	5636000	d__Bacteria;p__Proteobacteria;c__Gammaproteobacteria;o__Burkholderiales;f__Burkholderiaceae;g__Pandoraea	s__Pandoraea vervacti
GCF_000940805.1	NZ_CP007142.1	97.47	6475959	6475959	d__Bacteria;p__Proteobacteria;c__Gammaproteobacteria;o__Pseudomonadales;f__Saccharospirillaceae;g__Gynuella	s__Gynuella sunshinyii
GCF_000940845.1	NZ_CP010341.1	98.79	2649166	2649166	d__Bacteria;p__Actinobacteriota;c__Actinobacteria;o__Propionibacteriales;f__Propionibacteriaceae;g__Propionibacterium	s__Propionibacterium freudenreichii
GCF_000941055.1	NZ_CP007202.1	99.67	3303986	3303986	d__Bacteria;p__Bacteroidota;c__Bacteroidia;o__Flavobacteriales;f__Flavobacteriaceae;g__Siansivirga	s__Siansivirga zeaxanthinifaciens
GCF_000941075.1	NZ_CP007229.1	99.28	1084449	1084449	d__Bacteria;p__Firmicutes;c__Bacilli;o__Mycoplasmatales;f__Metamycoplasmataceae;g__Mesomycoplasma	s__Mesomycoplasma dispar
GCF_000949425.1	NZ_CP010976.1	99.26	5787303	5770242	d__Bacteria;p__Firmicutes_I;c__Bacilli_A;o__Paenibacillales;f__Paenibacillaceae;g__Paenibacillus	s__Paenibacillus sp000949425
GCF_000950575.1	NZ_CP011005.1	99.51	3599434	3595718	d__Bacteria;p__Actinobacteriota;c__Actinobacteria;o__Actinomycetales;f__Micrococcaceae;g__Renibacterium	s__Renibacterium sp000950575
GCF_000952975.1	NZ_LM997412.1	98.95	1601846	1601846	d__Bacteria;p__Firmicutes_A;c__Clostridia;o__Tissierellales;f__Peptoniphilaceae;g__Peptoniphilus_E	s__Peptoniphilus_E sp000952975
GCF_000953015.1	NZ_LN794158.1	100	1754988	1754988	d__Bacteria;p__Proteobacteria;c__Gammaproteobacteria;o__Burkholderiales;f__Methylophilaceae;g__Methylopumilus_A	s__Methylopumilus_A turicensis
GCF_000953135.1	NZ_LN614827.1	99.43	4434890	4181563	d__Bacteria;p__Proteobacteria;c__Gammaproteobacteria;o__Legionellales;f__Legionellaceae;g__Legionella	s__Legionella fallonii
GCF_000953215.1	NZ_LM995447.1	98.32	2229578	2229578	d__Bacteria;p__Firmicutes_A;c__Clostridia;o__Oscillospirales;f__Ethanoligenenaceae;g__Ruminiclostridium_D	s__Ruminiclostridium_D cellulosi
GCF_000953435.1	NZ_LM655252.1	27.08	357498	357498	d__Bacteria;p__Proteobacteria;c__Gammaproteobacteria;o__Evansiales;f__Evansiaceae;g__Evansia	s__Evansia muelleri
GCF_000953475.1	NZ_LM997411.1	99.32	2476671	2476671	d__Bacteria;p__Verrucomicrobiota;c__Verrucomicrobiae;o__Methylacidiphilales;f__Methylacidiphilaceae;g__Methylacidiphilum	s__Methylacidiphilum fumariolicum
GCF_000953635.1	NZ_LN614830.1	100	3310028	3310028	d__Bacteria;p__Proteobacteria;c__Gammaproteobacteria;o__Legionellales;f__Legionellaceae;g__Tatlockia	s__Tatlockia micdadei
GCF_000953655.1	NZ_LN681225.1	98.83	3570857	3440975	d__Bacteria;p__Proteobacteria;c__Gammaproteobacteria;o__Legionellales;f__Legionellaceae;g__Tatlockia	s__Tatlockia hackeliae
GCF_000953715.1	NZ_LN824141.1	100	2053097	2053097	d__Bacteria;p__Thermotogota;c__Thermotogae;o__Petrotogales;f__Petrotogaceae;g__Defluviitoga	s__Defluviitoga tunisiensis
GCF_000953735.1	NZ_LN554852.1	100	5093989	5086074	d__Bacteria;p__Proteobacteria;c__Gammaproteobacteria;o__Enterobacterales;f__Psychromonadaceae;g__Moritella	s__Moritella viscosa
GCF_000954115.1	NZ_CP010797.1	99.5	5341557	5341557	d__Bacteria;p__Actinobacteriota;c__Actinobacteria;o__Mycobacteriales;f__Mycobacteriaceae;g__Rhodococcus	s__Rhodococcus sp000954115
GCF_000960975.1	NZ_CP010803.1	99.22	4817335	4817335	d__Bacteria;p__Proteobacteria;c__Alphaproteobacteria;o__Rhizobiales;f__Rhizobiaceae;g__Martelella	s__Martelella endophytica
GCF_000961095.1	NZ_CP011058.1	99.52	5749967	5749967	d__Bacteria;p__Firmicutes_I;c__Bacilli_A;o__Paenibacillales;f__Paenibacillaceae;g__Paenibacillus_O	s__Paenibacillus_O beijingensis
GCF_000963515.1	NZ_CP006871.1	99.91	9784577	9784577	d__Bacteria;p__Actinobacteriota;c__Actinobacteria;o__Streptomycetales;f__Streptomycetaceae;g__Streptomyces	s__Streptomyces albulus_B
GCF_000963575.1	NZ_CP011077.1	99.99	5107633	5107633	d__Bacteria;p__Proteobacteria;c__Gammaproteobacteria;o__Enterobacterales;f__Enterobacteriaceae;g__Cedecea	s__Cedecea michiganensis
GCF_000963865.1	NZ_CP011071.1	99.01	3274259	3274259	d__Bacteria;p__Bacteroidota;c__Bacteroidia;o__Flavobacteriales;f__Flavobacteriaceae;g__Muricauda_A	s__Muricauda_A lutaonensis
GCF_000967895.1	NZ_FO203512.1	99.71	4406383	4406383	d__Bacteria;p__Proteobacteria;c__Gammaproteobacteria;o__Pseudomonadales;f__Saccharospirillaceae;g__Oleispira	s__Oleispira antarctica
GCF_000967915.1	NC_022549.1	98	1877792	1877792	d__Bacteria;p__Firmicutes;c__Bacilli;o__Acholeplasmatales;f__Acholeplasmataceae_A;g__Acholeplasma_C	s__Acholeplasma_C brassicae
GCF_000968055.1	NC_022538.1	100	1554229	1554229	d__Bacteria;p__Firmicutes;c__Bacilli;o__Acholeplasmatales;f__Acholeplasmataceae;g__Acholeplasma_D	s__Acholeplasma_D palmae
GCF_000968135.1	NZ_FO538765.1	99.5	4052370	4021307	d__Bacteria;p__Proteobacteria;c__Alphaproteobacteria;o__Rhodospirillales_A;f__Magnetospiraceae;g__Magnetospira	s__Magnetospira sp000968135
GCF_000968175.1	NZ_FO704551.1	100	3659523	3659523	d__Bacteria;p__Proteobacteria;c__Gammaproteobacteria;o__Enterobacterales;f__Enterobacteriaceae;g__Xenorhabdus	s__Xenorhabdus poinarii
GCF_000968195.1	NZ_FO704550.1	100	4203651	4195202	d__Bacteria;p__Proteobacteria;c__Gammaproteobacteria;o__Enterobacterales;f__Enterobacteriaceae;g__Xenorhabdus	s__Xenorhabdus doucetiae
GCF_000968375.1	NZ_CP009933.1	100	5749410	5749410	d__Bacteria;p__Firmicutes_A;c__Clostridia;o__Clostridiales;f__Clostridiaceae;g__Clostridium_AM	s__Clostridium_AM scatologenes
GCF_000968535.2	NC_016112.1	99.6	4796711	4668296	d__Bacteria;p__Proteobacteria;c__Gammaproteobacteria;o__Methylococcales;f__Methylomonadaceae;g__Methylomicrobium_A	s__Methylomicrobium_A alcaliphilum
GCF_000969645.2	NZ_CP014222.1	98.72	4726850	4726850	d__Bacteria;p__Proteobacteria;c__Gammaproteobacteria;o__Burkholderiales;f__Chitinibacteraceae;g__Iodobacter	s__Iodobacter sp000969645
GCF_000969765.1	NZ_CP011096.1	100	846495	846495	d__Bacteria;p__Firmicutes;c__Bacilli;o__Mycoplasmatales;f__Metamycoplasmataceae;g__Mycoplasmopsis_A	s__Mycoplasmopsis_A synoviae
GCF_000971765.1	NZ_CP010907.1	52.38	1196948	1150626	d__Bacteria;p__Proteobacteria;c__Gammaproteobacteria;o__Enterobacterales;f__Enterobacteriaceae;g__Pantoea_A	s__Pantoea_A carbekii
GCF_000972765.1	NZ_CP011265.1	98.63	4001000	4001000	d__Bacteria;p__Verrucomicrobiota;c__Verrucomicrobiae;o__Opitutales;f__Opitutaceae;g__IMCC26134_A	s__IMCC26134_A sp000972765
GCF_000972785.3	NZ_CP011253.3	99.1	6500731	5630311	d__Bacteria;p__Proteobacteria;c__Gammaproteobacteria;o__Burkholderiales;f__Burkholderiaceae;g__Pandoraea	s__Pandoraea oxalativorans
GCF_000972865.1	NZ_CP011144.1	100	3891720	3891720	d__Bacteria;p__Proteobacteria;c__Gammaproteobacteria;o__Xanthomonadales;f__Xanthomonadaceae;g__Pseudoxanthomonas	s__Pseudoxanthomonas suwonensis_B
GCF_000973085.1	NZ_CP011280.1	98.88	1330224	1330224	d__Bacteria;p__Fusobacteriota;c__Fusobacteriia;o__Fusobacteriales;f__Leptotrichiaceae;g__Sneathia	s__Sneathia amnii
GCF_000973105.1	NC_015844.1	99.67	5521712	5521712	d__Bacteria;p__Bacteroidota;c__Bacteroidia;o__Flavobacteriales;f__Flavobacteriaceae;g__Zobellia	s__Zobellia galactanivorans
GCF_000973125.1	NZ_FO818637.1	100	4820668	4635301	d__Bacteria;p__Proteobacteria;c__Gammaproteobacteria;o__Enterobacterales;f__Enterobacteriaceae;g__Xenorhabdus	s__Xenorhabdus bovienii_A
GCF_000973505.1	NZ_CP010048.1	96.25	749321	749321	d__Bacteria;p__Proteobacteria;c__Gammaproteobacteria;o__Enterobacterales;f__Enterobacteriaceae;g__Blochmannia	s__Blochmannia sp000973505
GCF_000973525.1	NZ_CP004391.1	99.55	2079121	2079121	d__Bacteria;p__Proteobacteria;c__Gammaproteobacteria;o__Enterobacterales;f__Pasteurellaceae;g__Pasteurella	s__Pasteurella multocida_A
GCF_000973545.1	NZ_CP010049.1	96.25	773940	773940	d__Bacteria;p__Proteobacteria;c__Gammaproteobacteria;o__Enterobacterales;f__Enterobacteriaceae;g__Blochmannia	s__Blochmannia sp000973545
GCF_000973625.1	NZ_CP007501.1	99.04	2026292	2026292	d__Bacteria;p__Proteobacteria;c__Gammaproteobacteria;o__Burkholderiales;f__Burkholderiaceae;g__Polynucleobacter	s__Polynucleobacter duraquae
GCF_000973725.1	NZ_CP009621.1	99.7	5462537	5462537	d__Bacteria;p__Bacteroidota;c__Bacteroidia;o__Cytophagales;f__Hymenobacteraceae;g__Pontibacter	s__Pontibacter korlensis
GCF_000974425.1	NZ_CP010429.1	99.7	7029352	7029352	d__Bacteria;p__Bacteroidota;c__Bacteroidia;o__Cytophagales;f__Spirosomaceae;g__Spirosoma	s__Spirosoma radiotolerans
GCF_000980815.1	NZ_CP011311.1	99.78	2451810	2451810	d__Bacteria;p__Actinobacteriota;c__Actinobacteria;o__Mycobacteriales;f__Mycobacteriaceae;g__Corynebacterium	s__Corynebacterium camporealensis
GCF_000980835.1	NZ_CP011312.1	99.38	2354065	2354065	d__Bacteria;p__Actinobacteriota;c__Actinobacteria;o__Mycobacteriales;f__Mycobacteriaceae;g__Corynebacterium	s__Corynebacterium kutscheri
GCF_000981505.1	NZ_LN827929.1	98.27	1356428	1356428	d__Bacteria;p__Proteobacteria;c__Gammaproteobacteria;o__Burkholderiales;f__Methylophilaceae;g__Methylopumilus	s__Methylopumilus planktonicus
GCF_000981525.1	NZ_LN774769.1	98.49	2503066	2394138	d__Bacteria;p__Firmicutes;c__Bacilli;o__Lactobacillales;f__Streptococcaceae;g__Lactococcus	s__Lactococcus piscium_C
GCF_000981585.1	NZ_LN831776.1	99.22	7919576	7919576	d__Bacteria;p__Firmicutes_I;c__Bacilli_A;o__Paenibacillales;f__Paenibacillaceae;g__Paenibacillus	s__Paenibacillus riograndensis
GCF_000981765.1	NZ_CP010975.1	100	2495242	2495242	d__Bacteria;p__Proteobacteria;c__Gammaproteobacteria;o__Enterobacterales;f__Kangiellaceae;g__Kangiella	s__Kangiella geojedonensis
GCF_000981785.2	NZ_CP011304.1	99.89	4301200	4294213	d__Bacteria;p__Cyanobacteria;c__Cyanobacteriia;o__Cyanobacteriales;f__Microcystaceae;g__Microcystis	s__Microcystis aeruginosa_C
GCF_000981805.1	NZ_CP011132.1	99.94	5875351	5584358	d__Bacteria;p__Proteobacteria;c__Gammaproteobacteria;o__Enterobacterales;f__Enterobacteriaceae;g__Citrobacter_A	s__Citrobacter_A amalonaticus_C
GCF_000982715.1	NZ_CP011341.1	99.33	5922748	5922748	d__Bacteria;p__Actinobacteriota;c__Actinobacteria;o__Mycobacteriales;f__Mycobacteriaceae;g__Rhodococcus	s__Rhodococcus aetherivorans
GCF_000982825.1	NZ_CP011047.1	99.97	4663565	4511265	d__Bacteria;p__Proteobacteria;c__Gammaproteobacteria;o__Enterobacterales;f__Enterobacteriaceae;g__Cronobacter	s__Cronobacter sakazakii
GCF_000993825.1	NZ_CP011114.1	99.8	5575484	5575484	d__Bacteria;p__Firmicutes_I;c__Bacilli_A;o__Paenibacillales;f__Paenibacillaceae;g__Paenibacillus	s__Paenibacillus durus_B
GCF_001006005.1	NZ_CP011254.1	99.94	6000511	6000511	d__Bacteria;p__Proteobacteria;c__Gammaproteobacteria;o__Enterobacterales;f__Enterobacteriaceae;g__Serratia_A	s__Serratia_A fonticola
GCF_001007875.1	NZ_CP011412.1	99.77	3962284	3928944	d__Bacteria;p__Proteobacteria;c__Gammaproteobacteria;o__Chromatiales;f__Sedimenticolaceae;g__Sedimenticola	s__Sedimenticola thiotaurini
GCF_001007935.1	NZ_CP011451.1	99.76	4067838	4067838	d__Bacteria;p__Proteobacteria;c__Gammaproteobacteria;o__Burkholderiales;f__Nitrosomonadaceae;g__Nitrosomonas	s__Nitrosomonas communis
GCF_001007995.1	NZ_CP011389.1	99.15	3236984	3236984	d__Bacteria;p__Deinococcota;c__Deinococci;o__Deinococcales;f__Deinococcaceae;g__Deinococcus	s__Deinococcus soli
GCF_001008165.2	NZ_CP011452.2	99.48	3475106	3386291	d__Bacteria;p__Proteobacteria;c__Alphaproteobacteria;o__Sphingomonadales;f__Sphingomonadaceae;g__Porphyrobacter_A	s__Porphyrobacter_A atlanticus
GCF_001010285.1	NZ_CP011104.1	100	5147098	5147098	d__Bacteria;p__Proteobacteria;c__Gammaproteobacteria;o__Enterobacterales;f__Enterobacteriaceae;g__Photorhabdus	s__Photorhabdus thracensis
GCF_001010805.1	NZ_CP011477.1	100	3481669	3468984	d__Bacteria;p__Proteobacteria;c__Gammaproteobacteria;o__Pseudomonadales;f__Spongiibacteraceae;g__IMCC21906	s__IMCC21906 sp001010805
GCF_001011155.1	NZ_CP011479.1	99.92	5119813	4842322	d__Bacteria;p__Proteobacteria;c__Alphaproteobacteria;o__Rhizobiales;f__Rhizobiaceae;g__Hoeflea	s__Hoeflea sp001011155
GCF_001013905.1	NZ_LN831790.1	100	8122491	7903895	d__Bacteria;p__Actinobacteriota;c__Actinobacteria;o__Streptomycetales;f__Streptomycetaceae;g__Streptomyces	s__Streptomyces leeuwenhoekii
GCF_001017435.1	NZ_CP011371.1	99.84	6476147	6476147	d__Bacteria;p__Proteobacteria;c__Gammaproteobacteria;o__Burkholderiales;f__Burkholderiaceae;g__Schlegelella	s__Schlegelella brachysporum
GCF_001017575.1	NZ_CP011372.1	98.78	1563032	1563032	d__Bacteria;p__Campylobacterota;c__Campylobacteria;o__Campylobacterales;f__Campylobacteraceae;g__Campylobacter_D	s__Campylobacter_D lari_C
GCF_001017655.1	NZ_CP010904.1	92.74	2949723	2949723	d__Bacteria;p__Verrucomicrobiota;c__Kiritimatiellae;o__Kiritimatiellales;f__Kiritimatiellaceae;g__Kiritimatiella	s__Kiritimatiella glycovorans
GCF_001020205.1	NZ_CP011663.1	99.31	4142990	4142990	d__Bacteria;p__Firmicutes_A;c__Clostridia;o__Clostridiales;f__Clostridiaceae;g__Clostridium_F	s__Clostridium_F sporogenes
GCF_001020985.1	NZ_CP011542.1	98.9	3474226	3391554	d__Bacteria;p__Actinobacteriota;c__Actinobacteria;o__Mycobacteriales;f__Mycobacteriaceae;g__Corynebacterium	s__Corynebacterium mustelae
GCF_001021025.1	NZ_CP011541.1	99.1	2692072	2692072	d__Bacteria;p__Actinobacteriota;c__Actinobacteria;o__Mycobacteriales;f__Mycobacteriaceae;g__Corynebacterium	s__Corynebacterium epidermidicanis
GCF_001021045.1	NZ_CP011545.1	99.45	2721226	2721226	d__Bacteria;p__Actinobacteriota;c__Actinobacteria;o__Mycobacteriales;f__Mycobacteriaceae;g__Corynebacterium	s__Corynebacterium testudinoris
GCF_001021065.1	NZ_CP011546.1	100	2419437	2419437	d__Bacteria;p__Actinobacteriota;c__Actinobacteria;o__Mycobacteriales;f__Mycobacteriaceae;g__Corynebacterium	s__Corynebacterium uterequi
GCF_001021085.1	NZ_CP004021.1	95.72	1192232	1192232	d__Bacteria;p__Proteobacteria;c__Alphaproteobacteria;o__Rhizobiales;f__Rhizobiaceae_A;g__Liberibacter	s__Liberibacter africanus
GCF_001021385.1	NZ_CP011773.1	99.81	6177406	6177406	d__Bacteria;p__Actinobacteriota;c__Actinobacteria;o__Mycobacteriales;f__Mycobacteriaceae;g__Mycolicibacterium	s__Mycolicibacterium sp001021385
GCF_001021975.1	NZ_CP009928.1	100	4633632	4633632	d__Bacteria;p__Bacteroidota;c__Bacteroidia;o__Flavobacteriales;f__Weeksellaceae;g__Chryseobacterium	s__Chryseobacterium gallinarum
GCF_001022135.1	NZ_CP011602.1	99.34	6166452	5529134	d__Bacteria;p__Proteobacteria;c__Gammaproteobacteria;o__Enterobacterales;f__Enterobacteriaceae;g__Metakosakonia	s__Metakosakonia intermedia
GCF_001023535.1	NZ_CP011020.1	100	6360256	6360256	d__Bacteria;p__Proteobacteria;c__Gammaproteobacteria;o__Pseudomonadales;f__Pseudomonadaceae;g__Pseudomonas_E	s__Pseudomonas_E chlororaphis_E
GCF_001023575.1	NZ_CP011489.1	99.15	2461858	2461858	d__Bacteria;p__Actinobacteriota;c__Acidimicrobiia;o__IMCC26256;f__IMCC26256;g__IMCC26256	s__IMCC26256 sp001023575
GCF_001025135.1	NZ_AP012323.1	99.54	2211039	2211039	d__Bacteria;p__Actinobacteriota;c__Actinobacteria;o__Actinomycetales;f__Bifidobacteriaceae;g__Bifidobacterium	s__Bifidobacterium bifidum
GCF_001025155.1	NZ_AP012322.1	99.77	2021974	2021974	d__Bacteria;p__Actinobacteriota;c__Actinobacteria;o__Actinomycetales;f__Bifidobacteriaceae;g__Bifidobacterium	s__Bifidobacterium angulatum
GCF_001025175.1	NZ_AP012324.1	100	2269415	2269415	d__Bacteria;p__Actinobacteriota;c__Actinobacteria;o__Actinomycetales;f__Bifidobacteriaceae;g__Bifidobacterium	s__Bifidobacterium breve
GCF_001025195.1	NZ_AP012325.1	100	2079525	2079525	d__Bacteria;p__Actinobacteriota;c__Actinobacteria;o__Actinomycetales;f__Bifidobacteriaceae;g__Bifidobacterium	s__Bifidobacterium catenulatum
GCF_001025215.1	NZ_AP012330.1	100	2313752	2313752	d__Bacteria;p__Actinobacteriota;c__Actinobacteria;o__Actinomycetales;f__Bifidobacteriaceae;g__Bifidobacterium	s__Bifidobacterium pseudocatenulatum
GCF_001027025.1	NZ_CP011232.1	98.28	2169170	2169170	d__Bacteria;p__Thermotogota;c__Thermotogae;o__Petrotogales;f__Kosmotogaceae;g__Kosmotoga_B	s__Kosmotoga_B pacifica
GCF_001027105.1	NZ_CP011526.1	99.51	2782562	2755072	d__Bacteria;p__Firmicutes;c__Bacilli;o__Staphylococcales;f__Staphylococcaceae;g__Staphylococcus	s__Staphylococcus aureus
GCF_001027285.1	NZ_CP011509.1	99.35	12489432	12489432	d__Bacteria;p__Myxococcota;c__Myxococcia;o__Myxococcales;f__Myxococcaceae;g__Archangium	s__Archangium gephyra
GCF_001027545.1	NZ_CP009498.1	95.51	1588979	1588979	d__Bacteria;p__Elusimicrobiota;c__Endomicrobia;o__Endomicrobiales;f__Endomicrobiaceae;g__Endomicrobium	s__Endomicrobium proavitum
GCF_001028625.1	NZ_CP011805.1	99.48	2885033	2885033	d__Bacteria;p__Proteobacteria;c__Alphaproteobacteria;o__Sphingomonadales;f__Sphingomonadaceae;g__Altererythrobacter_A	s__Altererythrobacter_A marensis
GCF_001028705.1	NZ_CP011770.1	99.46	3863562	3543806	d__Bacteria;p__Proteobacteria;c__Alphaproteobacteria;o__Sphingomonadales;f__Sphingomonadaceae;g__Croceicoccus	s__Croceicoccus naphthovorans
GCF_001029105.3	NZ_CP011807.3	99.55	5732664	5241671	d__Bacteria;p__Proteobacteria;c__Gammaproteobacteria;o__Burkholderiales;f__Burkholderiaceae;g__Pandoraea	s__Pandoraea faecigallinarum
GCF_001029265.1	NZ_CP011856.1	99.37	1365714	1365714	d__Bacteria;p__Firmicutes;c__Bacilli;o__Mycoplasmatales;f__Mycoplasmataceae;g__Spiroplasma	s__Spiroplasma eriocheiris
GCF_001038625.1	NZ_CP011803.1	99.31	5752782	5732880	d__Bacteria;p__Firmicutes_A;c__Clostridia;o__Clostridiales;f__Clostridiaceae;g__Clostridium_AM	s__Clostridium_AM carboxidivorans
GCF_001040945.1	NZ_CP011930.1	99.87	5509723	5509723	d__Bacteria;p__Proteobacteria;c__Gammaproteobacteria;o__Burkholderiales;f__Burkholderiaceae;g__Herbaspirillum	s__Herbaspirillum seropedicae
GCF_001042525.2	NZ_CP011921.2	99.82	1862215	1862215	d__Bacteria;p__Proteobacteria;c__Gammaproteobacteria;o__Francisellales;f__Francisellaceae;g__Francisella	s__Francisella noatunensis
GCF_001042595.1	NZ_AP012326.1	100	2635669	2635669	d__Bacteria;p__Actinobacteriota;c__Actinobacteria;o__Actinomycetales;f__Bifidobacteriaceae;g__Bifidobacterium	s__Bifidobacterium dentium
GCF_001042615.1	NZ_AP012327.1	100	2337234	2337234	d__Bacteria;p__Actinobacteriota;c__Actinobacteria;o__Actinomycetales;f__Bifidobacteriaceae;g__Bifidobacterium	s__Bifidobacterium kashiwanohense
GCF_001042635.1	NZ_AP012331.1	100	3158347	3158347	d__Bacteria;p__Actinobacteriota;c__Actinobacteria;o__Actinomycetales;f__Bifidobacteriaceae;g__Bifidobacterium	s__Bifidobacterium scardovii
GCF_001042655.1	NZ_AP012332.1	99.55	1667406	1667406	d__Bacteria;p__Actinobacteriota;c__Actinobacteria;o__Actinomycetales;f__Bifidobacteriaceae;g__Bifidobacterium	s__Bifidobacterium vaginale
GCF_001042675.1	NZ_AP012333.1	99.77	1890857	1890857	d__Bacteria;p__Actinobacteriota;c__Actinobacteria;o__Actinomycetales;f__Bifidobacteriaceae;g__Parascardovia	s__Parascardovia denticolens
GCF_001042695.1	NZ_AP012334.1	99.3	1797862	1797862	d__Bacteria;p__Actinobacteriota;c__Actinobacteria;o__Actinomycetales;f__Bifidobacteriaceae;g__Scardovia	s__Scardovia inopinata
GCF_001042715.1	NZ_CP009687.1	99.29	4207037	4201318	d__Bacteria;p__Firmicutes_A;c__Clostridia;o__Peptostreptococcales;f__Natronincolaceae;g__Clostridium_W	s__Clostridium_W aceticum
GCF_001043175.1	NZ_CP011494.1	99.99	3998597	3998597	d__Bacteria;p__Proteobacteria;c__Gammaproteobacteria;o__Pseudomonadales;f__Oleiphilaceae;g__Marinobacter	s__Marinobacter psychrophilus
GCF_001047675.1	NZ_CP011975.1	87.38	4000307	4000307	d__Bacteria;p__Proteobacteria;c__Gammaproteobacteria;o__Enterobacterales;f__Enterobacteriaceae;g__Yersinia	s__Yersinia aleksiciae
GCF_001050115.1	NZ_CP012024.1	99.04	3381292	3368778	d__Bacteria;p__Firmicutes;c__Bacilli;o__Bacillales;f__Domibacillaceae_A;g__Bacillus_O	s__Bacillus_O smithii
GCF_001050135.1	NZ_CP012040.1	100	6158829	6158829	d__Bacteria;p__Bacteroidota;c__Bacteroidia;o__Cytophagales;f__Cyclobacteriaceae;g__Cyclobacterium	s__Cyclobacterium amurskyense
GCF_001050475.1	NZ_CP012034.1	99.48	2590556	2590556	d__Bacteria;p__Firmicutes;c__Bacilli;o__Lactobacillales;f__Lactobacillaceae;g__Lactobacillus_K	s__Lactobacillus_K ginsenosidimutans
GCF_001051995.2	NZ_CP014646.1	99.9	4171754	4171754	d__Bacteria;p__Proteobacteria;c__Gammaproteobacteria;o__Burkholderiales;f__Rhodocyclaceae;g__Thauera	s__Thauera humireducens
GCF_001077815.2	NZ_CP011310.1	99.14	3226359	3012400	d__Bacteria;p__Proteobacteria;c__Alphaproteobacteria;o__Sphingomonadales;f__Sphingomonadaceae;g__Erythrobacter_B	s__Erythrobacter_B atlanticus
GCF_001078055.1	NZ_CP010777.1	99.95	4820793	4820793	d__Bacteria;p__Bacteroidota;c__Bacteroidia;o__Cytophagales;f__Hymenobacteraceae;g__Rufibacter	s__Rufibacter sp001078055
GCF_001182745.1	NZ_LN868938.1	99.75	6459780	3648762	d__Bacteria;p__Actinobacteriota;c__Actinobacteria;o__Mycobacteriales;f__Mycobacteriaceae;g__Nocardia	s__Nocardia farcinica
GCF_001183745.1	NZ_CP012111.1	99.5	2806148	2806148	d__Bacteria;p__Proteobacteria;c__Alphaproteobacteria;o__Acetobacterales;f__Acetobacteraceae;g__Acetobacter	s__Acetobacter pasteurianus_B
GCF_001183865.1	NZ_CP012020.1	100	3079044	3079044	d__Bacteria;p__Proteobacteria;c__Gammaproteobacteria;o__Burkholderiales;f__Methylophilaceae;g__Methylophilus	s__Methylophilus sp001183865
GCF_001185205.1	NZ_CP011300.1	98.6	4594249	4594249	d__Bacteria;p__Proteobacteria;c__Alphaproteobacteria;o__Rhizobiales;f__Devosiaceae;g__Devosia	s__Devosia sp001185205
GCF_001186155.3	NZ_CP016540.2	98.68	3330075	3249625	d__Bacteria;p__Firmicutes;c__Bacilli;o__Bacillales_A;f__Planococcaceae;g__Planococcus_A	s__Planococcus_A versutus
GCF_001186335.1	NZ_CP011507.1	99.66	6452803	6452803	d__Bacteria;p__Proteobacteria;c__Gammaproteobacteria;o__Pseudomonadales;f__Pseudomonadaceae;g__Pseudomonas_E	s__Pseudomonas_E trivialis_B
GCF_001187505.1	NZ_CP012150.1	99.78	7105933	7105933	d__Bacteria;p__Actinobacteriota;c__Actinobacteria;o__Mycobacteriales;f__Mycobacteriaceae;g__Mycolicibacterium	s__Mycolicibacterium goodii_B
GCF_001187595.1	NZ_CP012152.1	99.44	2803668	2803668	d__Bacteria;p__Firmicutes;c__Bacilli;o__Bacillales;f__Anoxybacillaceae;g__Anoxybacillus	s__Anoxybacillus gonensis
GCF_001187785.1	NZ_CP012154.1	99.64	3675202	3675202	d__Bacteria;p__Proteobacteria;c__Gammaproteobacteria;o__Xanthomonadales;f__Wenzhouxiangellaceae;g__Wenzhouxiangella	s__Wenzhouxiangella marina
GCF_001187845.1	NZ_CP012160.1	99.39	3264628	3233068	d__Bacteria;p__Proteobacteria;c__Alphaproteobacteria;o__Rhodobacterales;f__Rhodobacteraceae;g__Octadecabacter	s__Octadecabacter temperatus
GCF_001189295.1	NZ_CP012159.1	90.58	11388132	11388132	d__Bacteria;p__Myxococcota;c__Polyangia;o__Polyangiales;f__Polyangiaceae;g__Chondromyces	s__Chondromyces crocatus
GCF_001189495.1	NZ_CP012068.1	100	1739380	1739380	d__Bacteria;p__Firmicutes_A;c__Clostridia;o__Peptostreptococcales;f__Anaerovoracaceae;g__Eubacterium_B	s__Eubacterium_B sulci
GCF_001189515.2	NZ_CP012069.2	100	3213585	3213585	d__Bacteria;p__Actinobacteriota;c__Coriobacteriia;o__Coriobacteriales;f__Atopobiaceae;g__Olsenella	s__Olsenella sp001189515
GCF_001189535.1	NZ_CP012070.1	100	3525271	3525271	d__Bacteria;p__Actinobacteriota;c__Actinobacteria;o__Actinomycetales;f__Dermatophilaceae;g__Arsenicicoccus	s__Arsenicicoccus sp001189535
GCF_001189555.1	NZ_CP012071.1	99.31	2284135	2284135	d__Bacteria;p__Firmicutes_C;c__Negativicutes;o__Selenomonadales;f__Selenomonadaceae;g__Centipeda	s__Centipeda sp001189555
GCF_001190745.1	NZ_CP012196.1	97.47	2281652	2281652	d__Bacteria;p__Campylobacterota;c__Campylobacteria;o__Campylobacterales;f__Campylobacteraceae;g__Campylobacter_B	s__Campylobacter_B gracilis
GCF_001190925.1	NZ_CP011072.1	99.79	5257030	5257030	d__Bacteria;p__Proteobacteria;c__Gammaproteobacteria;o__Burkholderiales;f__Rhodocyclaceae;g__Azoarcus_A	s__Azoarcus_A sp001190925
GCF_001190945.1	NZ_CP011112.1	100	5420910	5420910	d__Bacteria;p__Actinobacteriota;c__Actinobacteria;o__Actinomycetales;f__Dermatophilaceae;g__Luteipulveratus	s__Luteipulveratus mongoliensis
GCF_001191005.1	NZ_CP012201.1	99.9	6361416	6361416	d__Bacteria;p__Proteobacteria;c__Gammaproteobacteria;o__Burkholderiales;f__Burkholderiaceae;g__Pseudoduganella	s__Pseudoduganella sp001191005
GCF_001262075.1	NZ_CP012073.1	99.02	2925783	2925783	d__Bacteria;p__Proteobacteria;c__Gammaproteobacteria;o__Burkholderiales;f__Burkholderiaceae;g__Ottowia	s__Ottowia sp001262075
GCF_001262715.1	NZ_CP012328.1	99.25	1261374	1261374	d__Bacteria;p__Firmicutes;c__Bacilli;o__Mycoplasmatales;f__Mycoplasmataceae;g__Spiroplasma_A	s__Spiroplasma_A turonicum
GCF_001263175.1	NZ_CP012332.1	92.26	4350553	4350553	d__Bacteria;p__Myxococcota;c__Myxococcia;o__Myxococcales;f__Vulgatibacteraceae;g__Vulgatibacter	s__Vulgatibacter incomptus
GCF_001263395.1	NZ_CP011786.1	93.86	1830060	1830060	d__Bacteria;p__Actinobacteriota;c__Actinobacteria;o__Actinomycetales;f__Bifidobacteriaceae;g__Bifidobacterium	s__Bifidobacterium actinocoloniiforme
GCF_001267155.1	NZ_CP012357.1	98.87	1225519	1225519	d__Bacteria;p__Firmicutes;c__Bacilli;o__Mycoplasmatales;f__Mycoplasmataceae;g__Spiroplasma_A	s__Spiroplasma_A litorale
GCF_001267175.1	NZ_CP012358.1	96.59	2494031	2494031	d__Bacteria;p__Proteobacteria;c__Gammaproteobacteria;o__Pseudomonadales;f__Pseudomonadaceae;g__Oblitimonas	s__Oblitimonas alkaliphila
GCF_001267405.1	NZ_CP012369.1	99.23	2527564	2527564	d__Bacteria;p__Firmicutes_B;c__Moorellia;o__Moorellales;f__Moorellaceae;g__Moorella	s__Moorella thermoacetica
GCF_001267885.1	NZ_CP012382.1	100	8393598	8303940	d__Bacteria;p__Actinobacteriota;c__Actinobacteria;o__Streptomycetales;f__Streptomycetaceae;g__Streptomyces	s__Streptomyces ambofaciens
GCF_001267925.1	NZ_CP011409.1	96.55	4965474	4965474	d__Bacteria;p__Proteobacteria;c__Gammaproteobacteria;o__Burkholderiales;f__Burkholderiaceae;g__Herbaspirillum	s__Herbaspirillum hiltneri
GCF_001269425.1	NZ_CP011787.1	97.5	636137	632672	d__Bacteria;p__Proteobacteria;c__Gammaproteobacteria;o__Enterobacterales;f__Enterobacteriaceae;g__Baumannia	s__Baumannia cicadellinicola_A
GCF_001271345.1	NZ_CP012398.1	99.37	5243734	4394046	d__Bacteria;p__Proteobacteria;c__Alphaproteobacteria;o__Rhizobiales;f__Beijerinckiaceae;g__Chelatococcus	s__Chelatococcus sp001271345
GCF_001272835.1	NZ_CP010546.1	99.25	817207	817207	d__Bacteria;p__Firmicutes;c__Bacilli;o__Mycoplasmatales;f__Mycoplasmoidaceae;g__Mycoplasmoides	s__Mycoplasmoides pneumoniae
GCF_001273775.1	NZ_CP011801.1	95.91	4589485	4589485	d__Bacteria;p__Nitrospirota;c__Nitrospiria;o__Nitrospirales;f__Nitrospiraceae;g__Nitrospira	s__Nitrospira moscoviensis
GCF_001273795.1	NZ_CP012420.1	99.92	1456213	1415369	d__Bacteria;p__Proteobacteria;c__Alphaproteobacteria;o__Rickettsiales;f__Rickettsiaceae;g__Rickettsia	s__Rickettsia amblyommatis
GCF_001274535.1	NZ_CP012410.1	98.88	2444904	2444904	d__Bacteria;p__Fusobacteriota;c__Fusobacteriia;o__Fusobacteriales;f__Leptotrichiaceae;g__Leptotrichia_A	s__Leptotrichia_A sp001274535
GCF_001274595.1	NZ_CP011010.1	99.66	4804002	4804002	d__Bacteria;p__Proteobacteria;c__Gammaproteobacteria;o__Xanthomonadales;f__Xanthomonadaceae;g__Stenotrophomonas	s__Stenotrophomonas maltophilia_AJ
GCF_001274875.1	NZ_CP010899.1	96.62	1514561	1463926	d__Bacteria;p__Firmicutes;c__Bacilli;o__Mycoplasmatales;f__Mycoplasmataceae;g__Spiroplasma	s__Spiroplasma kunkelii
GCF_001274895.1	NZ_CP006841.1	100	2769745	2769745	d__Bacteria;p__Actinobacteriota;c__Actinobacteria;o__Mycobacteriales;f__Mycobacteriaceae;g__Corynebacterium	s__Corynebacterium lactis
GCF_001277175.1	NZ_CP012257.1	99.67	4436873	4307096	d__Bacteria;p__Proteobacteria;c__Gammaproteobacteria;o__Enterobacterales;f__Enterobacteriaceae;g__Cronobacter	s__Cronobacter universalis
GCF_001277195.1	NZ_CP012268.1	99.4	4364114	4364114	d__Bacteria;p__Proteobacteria;c__Gammaproteobacteria;o__Enterobacterales;f__Enterobacteriaceae;g__Cronobacter	s__Cronobacter muytjensii
GCF_001277215.2	NZ_CP013940.1	99.97	4473761	4294639	d__Bacteria;p__Proteobacteria;c__Gammaproteobacteria;o__Enterobacterales;f__Enterobacteriaceae;g__Cronobacter	s__Cronobacter malonaticus
GCF_001277235.1	NZ_CP012266.1	99.67	4628405	4431067	d__Bacteria;p__Proteobacteria;c__Gammaproteobacteria;o__Enterobacterales;f__Enterobacteriaceae;g__Cronobacter	s__Cronobacter dublinensis
GCF_001277255.1	NZ_CP012264.1	99.7	4499482	4347991	d__Bacteria;p__Proteobacteria;c__Gammaproteobacteria;o__Enterobacterales;f__Enterobacteriaceae;g__Cronobacter	s__Cronobacter condimenti
GCF_001277295.1	NZ_CP011456.1	99.78	5782034	5705437	d__Bacteria;p__Cyanobacteria;c__Cyanobacteriia;o__Cyanobacteriales;f__Nostocaceae;g__Aphanizomenon_A	s__Aphanizomenon_A sp001277295
GCF_001277995.1	NZ_CP009220.1	99.45	3033893	2972149	d__Bacteria;p__Actinobacteriota;c__Actinobacteria;o__Mycobacteriales;f__Mycobacteriaceae;g__Corynebacterium	s__Corynebacterium deserti
GCF_001278035.1	NZ_CP009452.1	99.3	4664213	4420776	d__Bacteria;p__Proteobacteria;c__Alphaproteobacteria;o__Sphingomonadales;f__Sphingomonadaceae;g__Sphingopyxis	s__Sphingopyxis sp001278035
GCF_001278055.1	NZ_CP010802.1	99.03	3958620	3958620	d__Bacteria;p__Desulfuromonadota;c__Desulfuromonadia;o__Desulfuromonadales;f__Desulfuromonadaceae_C;g__Desulfuromonas_B	s__Desulfuromonas_B soudanensis
GCF_001278075.1	NZ_CP011340.1	99.93	8532592	8532592	d__Bacteria;p__Actinobacteriota;c__Actinobacteria;o__Streptomycetales;f__Streptomycetaceae;g__Streptomyces	s__Streptomyces pristinaespiralis
GCF_001278845.1	NZ_CP012590.1	99.53	3836419	3836419	d__Bacteria;p__Actinobacteriota;c__Actinobacteria;o__Actinomycetales;f__Actinomycetaceae;g__Actinomyces	s__Actinomyces sp001278845
GCF_001280205.1	NZ_CP012573.1	98.99	3241713	3056296	d__Bacteria;p__Actinobacteriota;c__Actinobacteria;o__Actinomycetales;f__Microbacteriaceae;g__Clavibacter	s__Clavibacter capsici
GCF_001280225.1	NZ_CP009253.1	98.77	638851	628164	d__Bacteria;p__Proteobacteria;c__Gammaproteobacteria;o__Enterobacterales;f__Enterobacteriaceae;g__Buchnera	s__Buchnera aphidicola_E
GCF_001280305.1	NZ_CP012623.1	100	3777136	3777136	d__Bacteria;p__Bacteroidota;c__Bacteroidia;o__Cytophagales;f__Hymenobacteraceae;g__Hymenobacter	s__Hymenobacter sp001280305
GCF_001281025.1	NZ_CP012646.1	99.42	1906344	1906344	d__Bacteria;p__Firmicutes;c__Bacilli;o__Lactobacillales;f__Streptococcaceae;g__Streptococcus	s__Streptococcus mitis_AK
GCF_001281045.1	NZ_CP012622.1	98.87	1179577	1179577	d__Bacteria;p__Firmicutes;c__Bacilli;o__Mycoplasmatales;f__Mycoplasmataceae;g__Spiroplasma_A	s__Spiroplasma_A cantharicola
GCF_001281315.1	NZ_CP012479.1	97.88	4936686	4030317	d__Bacteria;p__Actinobacteriota;c__Actinobacteria;o__Actinomycetales;f__Micrococcaceae;g__Arthrobacter_A	s__Arthrobacter_A sp001281315
GCF_001281385.1	NZ_CP006911.1	98.68	1714148	1714148	d__Bacteria;p__Proteobacteria;c__Gammaproteobacteria;o__Thiomicrospirales;f__Thioglobaceae;g__Thioglobus	s__Thioglobus singularis
GCF_001281405.1	NZ_CP010401.1	97.12	1467695	1467695	d__Bacteria;p__Proteobacteria;c__Alphaproteobacteria;o__Rhizobiales;f__Rhizobiaceae;g__Bartonella	s__Bartonella ancashensis
GCF_001281485.1	NZ_CP012669.1	99.25	2786256	2786256	d__Bacteria;p__Proteobacteria;c__Alphaproteobacteria;o__Sphingomonadales;f__Sphingomonadaceae;g__Altererythrobacter	s__Altererythrobacter epoxidivorans
GCF_001293125.1	NZ_CP009312.1	95	1860551	1860551	d__Bacteria;p__Actinobacteriota;c__Actinobacteria;o__Mycobacteriales;f__Mycobacteriaceae;g__Lawsonella	s__Lawsonella clevelandensis
GCF_001293165.1	NZ_CP010552.1	99.17	1512449	1512449	d__Bacteria;p__Proteobacteria;c__Gammaproteobacteria;o__Thiomicrospirales;f__Thioglobaceae;g__Thioglobus_A	s__Thioglobus_A autotrophicus
GCF_001294575.1	NZ_CP012676.1	100	5149788	5149788	d__Bacteria;p__Proteobacteria;c__Gammaproteobacteria;o__Pseudomonadales;f__Pseudomonadaceae;g__Pseudomonas_E	s__Pseudomonas_E versuta
GCF_001294625.1	NZ_CP012677.1	99.54	4046453	4046453	d__Bacteria;p__Actinobacteriota;c__Actinobacteria;o__Actinomycetales;f__Micrococcaceae;g__Arthrobacter_A	s__Arthrobacter_A alpinus_A
GCF_001294645.1	NZ_CP011868.1	98.51	6300975	6058802	d__Bacteria;p__Actinobacteriota;c__Actinobacteria;o__Mycobacteriales;f__Pseudonocardiaceae;g__Pseudonocardia	s__Pseudonocardia sp001294645
GCF_001295365.1	NZ_CP012712.1	99.41	3873116	3873116	d__Bacteria;p__Firmicutes;c__Bacilli;o__Bacillales;f__Anoxybacillaceae;g__Parageobacillus	s__Parageobacillus thermoglucosidasius
GCF_001298465.1	NZ_CP012541.1	99.88	1840041	1840041	d__Bacteria;p__Campylobacterota;c__Campylobacteria;o__Campylobacterales;f__Campylobacteraceae;g__Campylobacter_A	s__Campylobacter_A concisus
GCF_001298525.1	NZ_CP012678.1	99.73	2931580	2802354	d__Bacteria;p__Proteobacteria;c__Gammaproteobacteria;o__Pseudomonadales;f__Moraxellaceae;g__Psychrobacter	s__Psychrobacter urativorans
GCF_001302565.1	NZ_CP012750.1	99.51	3918424	3911798	d__Bacteria;p__Actinobacteriota;c__Actinobacteria;o__Actinomycetales;f__Micrococcaceae;g__Glutamicibacter	s__Glutamicibacter halophytocola
GCF_001302585.1	NZ_CP012752.1	99.82	11759770	11759770	d__Bacteria;p__Actinobacteriota;c__Actinobacteria;o__Mycobacteriales;f__Pseudonocardiaceae;g__Kibdelosporangium	s__Kibdelosporangium phytohabitans
GCF_001305575.2	NZ_CP012373.1	98.81	4265296	4265296	d__Bacteria;p__Proteobacteria;c__Gammaproteobacteria;o__Beggiatoales;f__Beggiatoaceae;g__Beggiatoa	s__Beggiatoa leptomitoformis
GCF_001305615.1	NZ_CP010869.1	99.39	4147426	3649316	d__Bacteria;p__Proteobacteria;c__Alphaproteobacteria;o__Rhodobacterales;f__Rhodobacteraceae;g__Confluentimicrobium	s__Confluentimicrobium sp001305615
GCF_001305675.1	NZ_CP011853.1	100	4428727	4428727	d__Bacteria;p__Actinobacteriota;c__Actinobacteria;o__Mycobacteriales;f__Mycobacteriaceae;g__Gordonia	s__Gordonia phthalatica
GCF_001307155.1	NZ_CP012830.1	99.52	6391871	6391871	d__Bacteria;p__Proteobacteria;c__Gammaproteobacteria;o__Pseudomonadales;f__Pseudomonadaceae;g__Pseudomonas_E	s__Pseudomonas_E fluorescens_E
GCF_001307195.1	NZ_CP012808.1	99.66	3054269	3054269	d__Bacteria;p__Proteobacteria;c__Gammaproteobacteria;o__Pseudomonadales;f__Moraxellaceae;g__Acinetobacter	s__Acinetobacter equi
GCF_001307275.1	NZ_CP012831.1	100	7119102	7119102	d__Bacteria;p__Proteobacteria;c__Gammaproteobacteria;o__Pseudomonadales;f__Pseudomonadaceae;g__Pseudomonas_E	s__Pseudomonas_E fluorescens_AA
GCF_001307295.1	NZ_CP012700.1	99.47	5098553	4757879	d__Bacteria;p__Proteobacteria;c__Alphaproteobacteria;o__Sphingomonadales;f__Sphingomonadaceae;g__Sphingopyxis	s__Sphingopyxis macrogoltabida_B
GCF_001307805.1	NZ_CP013862.1	98.67	3858284	3858284	d__Bacteria;p__Firmicutes;c__Bacilli;o__Bacillales;f__Amphibacillaceae;g__Lentibacillus	s__Lentibacillus amyloliquefaciens
GCF_001308265.1	NZ_CP012023.1	99.24	3096705	3096705	d__Bacteria;p__Proteobacteria;c__Alphaproteobacteria;o__Rhodobacterales;f__Rhodobacteraceae;g__Celeribacter_A	s__Celeribacter_A marinus
GCF_001310085.1	NZ_CP012643.1	100	5413467	5165513	d__Bacteria;p__Bacteroidota;c__Bacteroidia;o__Cytophagales;f__Hymenobacteraceae;g__Rufibacter	s__Rufibacter tibetensis
GCF_001310225.1	NZ_CP012898.1	98.68	3994770	3994770	d__Bacteria;p__Bacteroidota;c__Bacteroidia;o__Flavobacteriales;f__Flavobacteriaceae;g__Algibacter_A	s__Algibacter_A alginicilyticus
GCF_001310255.1	NZ_CP012897.1	99.57	3475610	3475610	d__Bacteria;p__Proteobacteria;c__Alphaproteobacteria;o__Caulobacterales;f__Caulobacteraceae;g__Brevundimonas	s__Brevundimonas sp001310255
GCF_001314225.1	NZ_CP012697.1	98.7	4827965	4599046	d__Bacteria;p__Actinobacteriota;c__Actinobacteria;o__Actinomycetales;f__Microbacteriaceae;g__Microbacterium	s__Microbacterium sp001314225
GCF_001314325.1	NZ_CP009429.1	99.64	5748623	5174928	d__Bacteria;p__Proteobacteria;c__Alphaproteobacteria;o__Sphingomonadales;f__Sphingomonadaceae;g__Sphingopyxis	s__Sphingopyxis macrogoltabida
GCF_001314995.1	NZ_CP012938.1	99.46	6472489	6472489	d__Bacteria;p__Bacteroidota;c__Bacteroidia;o__Bacteroidales;f__Bacteroidaceae;g__Bacteroides	s__Bacteroides ovatus
GCF_001315015.1	NZ_CP012914.1	100	6587527	3005726	d__Bacteria;p__Proteobacteria;c__Alphaproteobacteria;o__Azospirillales;f__Azospirillaceae;g__Azospirillum	s__Azospirillum brasilense
GCF_001318295.1	NZ_CP012665.1	89.86	915884	915884	d__Bacteria;p__Verrucomicrobiota;c__Verrucomicrobiae;o__Chthoniobacterales;f__Xiphinematobacteraceae;g__Xiphinematobacter	s__Xiphinematobacter sp001318295
GCF_001402875.1	NZ_CP012946.1	96.77	3724841	3724841	d__Bacteria;p__Proteobacteria;c__Alphaproteobacteria;o__Rhizobiales;f__Xanthobacteraceae;g__Blastochloris	s__Blastochloris viridis
GCF_001402915.1	NZ_CP012945.1	99.34	5032994	5032994	d__Bacteria;p__Proteobacteria;c__Alphaproteobacteria;o__Rhizobiales;f__Devosiaceae;g__Devosia	s__Devosia sp001402915
GCF_001412535.1	NZ_CP011774.1	99.97	3372992	3372992	d__Bacteria;p__Proteobacteria;c__Gammaproteobacteria;o__Burkholderiales;f__Burkholderiaceae;g__Limnohabitans	s__Limnohabitans sp001412535
GCF_001412575.1	NZ_CP011834.1	99.22	2948795	2948795	d__Bacteria;p__Proteobacteria;c__Gammaproteobacteria;o__Burkholderiales;f__Burkholderiaceae;g__Limnohabitans	s__Limnohabitans sp001412575
GCF_001412595.2	NZ_CP012640.2	99.72	6216151	6013801	d__Bacteria;p__Proteobacteria;c__Gammaproteobacteria;o__Burkholderiales;f__Burkholderiaceae;g__Massilia	s__Massilia sp001412595
GCF_001412655.1	NZ_CP012996.1	100	6147290	6147290	d__Bacteria;p__Bacteroidota;c__Bacteroidia;o__Sphingobacteriales;f__Sphingobacteriaceae;g__Pedobacter	s__Pedobacter sp001412655
GCF_001414055.1	NZ_CP013002.1	99.98	3957288	3864204	d__Bacteria;p__Proteobacteria;c__Alphaproteobacteria;o__Caulobacterales;f__Caulobacteraceae;g__Caulobacter	s__Caulobacter henricii
GCF_001420915.1	NZ_CP013021.1	100	4416600	4416600	d__Bacteria;p__Proteobacteria;c__Gammaproteobacteria;o__Enterobacterales;f__Psychromonadaceae_A;g__Agarivorans	s__Agarivorans gilvus
GCF_001420995.1	NZ_CP012184.1	98.87	7205934	6149338	d__Bacteria;p__Actinobacteriota;c__Actinobacteria;o__Mycobacteriales;f__Pseudonocardiaceae;g__Pseudonocardia	s__Pseudonocardia sp001420995
GCF_001421015.2	NZ_CP013023.1	99.61	5517199	5354277	d__Bacteria;p__Firmicutes_I;c__Bacilli_A;o__Paenibacillales;f__Paenibacillaceae;g__Paenibacillus_J	s__Paenibacillus_J bovis
GCF_001430825.1	NZ_CP010535.1	99.67	3569807	3569807	d__Bacteria;p__Bacteroidota;c__Bacteroidia;o__Flavobacteriales;f__Flavobacteriaceae;g__Sediminicola	s__Sediminicola sp001430825
GCF_001431725.1	NZ_CP013106.1	99.57	4757486	4757486	d__Bacteria;p__Proteobacteria;c__Gammaproteobacteria;o__Pseudomonadales;f__Halomonadaceae;g__Halomonas	s__Halomonas huangheensis
GCF_001432245.1	NZ_CP013114.1	99.44	2822193	2822193	d__Bacteria;p__Firmicutes;c__Bacilli;o__Staphylococcales;f__Staphylococcaceae;g__Staphylococcus	s__Staphylococcus equorum_B
GCF_001441165.1	NZ_CP013126.1	100	3651382	3651382	d__Bacteria;p__Actinobacteriota;c__Actinobacteria;o__Propionibacteriales;f__Propionibacteriaceae;g__Acidipropionibacterium	s__Acidipropionibacterium acidipropionici
GCF_001442535.1	NZ_CP013141.1	99.91	5765176	5765176	d__Bacteria;p__Proteobacteria;c__Gammaproteobacteria;o__Xanthomonadales;f__Xanthomonadaceae;g__Lysobacter	s__Lysobacter antibioticus
GCF_001442755.1	NZ_CP006367.1	99.19	5210858	3742793	d__Bacteria;p__Proteobacteria;c__Alphaproteobacteria;o__Rhizobiales;f__Rhizobiaceae;g__Aureimonas	s__Aureimonas sp001442755
GCF_001442785.1	NZ_CP011130.1	99.8	6391889	6391889	d__Bacteria;p__Proteobacteria;c__Gammaproteobacteria;o__Xanthomonadales;f__Xanthomonadaceae;g__Lysobacter	s__Lysobacter capsici
GCF_001442805.1	NZ_CP011131.1	99.8	6056618	6056618	d__Bacteria;p__Proteobacteria;c__Gammaproteobacteria;o__Xanthomonadales;f__Xanthomonadaceae;g__Lysobacter	s__Lysobacter gummosus
GCF_001443605.1	NZ_CP013118.1	99.52	4812386	4812386	d__Bacteria;p__Bacteroidota;c__Bacteroidia;o__Bacteroidales;f__Salinivirgaceae;g__Salinivirga	s__Salinivirga cyanobacteriivorans
GCF_001443625.1	NZ_CP013129.1	99.67	9054831	9054831	d__Bacteria;p__Actinobacteriota;c__Actinobacteria;o__Streptomycetales;f__Streptomycetaceae;g__Streptomyces	s__Streptomyces venezuelae_A
GCF_001444425.1	NZ_CP013189.1	97.78	3345119	3345119	d__Bacteria;p__Proteobacteria;c__Gammaproteobacteria;o__Pseudomonadales;f__Pseudohongiellaceae;g__Pseudohongiella	s__Pseudohongiella spirulinae
GCF_001445575.1	NZ_CP013200.1	98.43	4333648	4322479	d__Bacteria;p__Actinobacteriota;c__Actinobacteria;o__Actinomycetales;f__Micrococcaceae;g__Arthrobacter_A	s__Arthrobacter_A alpinus_C
GCF_001447155.2	NZ_CP014754.1	100	4435564	4435564	d__Bacteria;p__Proteobacteria;c__Gammaproteobacteria;o__Pseudomonadales;f__Oleiphilaceae;g__Marinobacter	s__Marinobacter sp001447155
GCF_001455205.1	NZ_CP013341.1	99.84	3307820	3307820	d__Bacteria;p__Proteobacteria;c__Gammaproteobacteria;o__Burkholderiales;f__Nitrosomonadaceae;g__Nitrosomonas	s__Nitrosomonas ureae
GCF_001455345.1	NZ_CP013274.1	99.01	5352926	5327397	d__Bacteria;p__Firmicutes;c__Bacilli;o__Bacillales;f__Bacillaceae_G;g__Bacillus_A	s__Bacillus_A thuringiensis_N
GCF_001456115.1	NZ_CP013264.1	99.54	4583422	4107398	d__Bacteria;p__Proteobacteria;c__Alphaproteobacteria;o__Sphingomonadales;f__Sphingomonadaceae;g__Sphingobium	s__Sphingobium baderi_A
GCF_001456155.1	NZ_CP013293.1	100	4077766	4072208	d__Bacteria;p__Bacteroidota;c__Bacteroidia;o__Flavobacteriales;f__Weeksellaceae;g__Chryseobacterium	s__Chryseobacterium sp001456155
GCF_001456355.1	NZ_CP010271.1	99.5	4649175	4649175	d__Bacteria;p__Actinobacteriota;c__Actinobacteria;o__Mycobacteriales;f__Mycobacteriaceae;g__Mycobacteroides	s__Mycobacteroides saopaulense
GCF_001457455.1	NZ_LN831026.1	99.45	2463666	2463666	d__Bacteria;p__Actinobacteriota;c__Actinobacteria;o__Mycobacteriales;f__Mycobacteriaceae;g__Corynebacterium	s__Corynebacterium diphtheriae
GCF_001457475.1	NZ_LN831029.1	99.53	6813182	6813182	d__Bacteria;p__Proteobacteria;c__Gammaproteobacteria;o__Burkholderiales;f__Burkholderiaceae;g__Achromobacter	s__Achromobacter xylosoxidans
GCF_001457555.1	NZ_LN831027.1	100	2455060	2443126	d__Bacteria;p__Fusobacteriota;c__Fusobacteriia;o__Fusobacteriales;f__Fusobacteriaceae;g__Fusobacterium	s__Fusobacterium polymorphum
GCF_001457595.1	NZ_LN831039.1	99.94	6983267	6983267	d__Bacteria;p__Actinobacteriota;c__Actinobacteria;o__Mycobacteriales;f__Mycobacteriaceae;g__Mycolicibacterium	s__Mycolicibacterium smegmatis
GCF_001457615.1	NZ_LN831024.1	99.68	6316979	6316979	d__Bacteria;p__Proteobacteria;c__Gammaproteobacteria;o__Pseudomonadales;f__Pseudomonadaceae;g__Pseudomonas	s__Pseudomonas aeruginosa
GCF_001457635.1	NZ_LN831051.1	99.18	2110968	2110968	d__Bacteria;p__Firmicutes;c__Bacilli;o__Lactobacillales;f__Streptococcaceae;g__Streptococcus	s__Streptococcus pneumoniae
GCF_001457655.1	NZ_LN831035.1	99.77	1890645	1890645	d__Bacteria;p__Proteobacteria;c__Gammaproteobacteria;o__Enterobacterales;f__Pasteurellaceae;g__Haemophilus	s__Haemophilus influenzae
GCF_001457695.1	NZ_LN831025.1	99.38	1766442	1766442	d__Bacteria;p__Campylobacterota;c__Campylobacteria;o__Campylobacterales;f__Campylobacteraceae;g__Campylobacter_D	s__Campylobacter_D jejuni
GCF_001458695.1	NZ_LN885086.1	96.82	3295117	3295117	d__Bacteria;p__Nitrospirota;c__Nitrospiria;o__Nitrospirales;f__Nitrospiraceae;g__Nitrospira	s__Nitrospira inopinata
GCF_001460635.1	NZ_LN907858.1	99.31	1920832	1920832	d__Bacteria;p__Campylobacterota;c__Campylobacteria;o__Campylobacterales;f__Helicobacteraceae;g__Helicobacter_C	s__Helicobacter_C typhlonius
GCF_001465275.1	NZ_CP013653.1	99.17	5375858	5375858	d__Bacteria;p__Firmicutes_I;c__Bacilli_A;o__Paenibacillales;f__Paenibacillaceae;g__32O-W	s__32O-W sp001465275
GCF_001465545.3	NZ_CP013480.3	99.55	6167370	6167370	d__Bacteria;p__Proteobacteria;c__Gammaproteobacteria;o__Burkholderiales;f__Burkholderiaceae;g__Pandoraea	s__Pandoraea norimbergensis
GCF_001465595.2	NZ_CP013481.2	99.43	5571260	5493967	d__Bacteria;p__Proteobacteria;c__Gammaproteobacteria;o__Burkholderiales;f__Burkholderiaceae;g__Pandoraea	s__Pandoraea apista
GCF_001465795.2	NZ_CP013659.2	99.34	3505011	3505011	d__Bacteria;p__Firmicutes;c__Bacilli;o__Bacillales_A;f__Planococcaceae;g__Planococcus_B	s__Planococcus_B rifietoensis
GCF_001465835.2	NZ_CP013661.2	99.34	3485580	3472056	d__Bacteria;p__Firmicutes;c__Bacilli;o__Bacillales_A;f__Planococcaceae;g__Planococcus_A	s__Planococcus_A kocurii
GCF_001466725.1	NZ_CP013650.1	99.71	4378835	4378835	d__Bacteria;p__Proteobacteria;c__Gammaproteobacteria;o__Enterobacterales;f__Alteromonadaceae;g__Lacimicrobium	s__Lacimicrobium alkaliphilum_B
GCF_001477625.1	NZ_CP013692.1	100	5169161	5169161	d__Bacteria;p__Proteobacteria;c__Gammaproteobacteria;o__Burkholderiales;f__Burkholderiaceae;g__Paucibacter	s__Paucibacter sp001477625
GCF_001481725.1	NZ_CP011914.1	99.3	4150332	4150332	d__Bacteria;p__Firmicutes_A;c__Clostridia;o__Eubacteriales;f__Eubacteriaceae;g__Eubacterium	s__Eubacterium limosum_A
GCF_001482365.1	NZ_CP013254.1	99.34	3638342	3504335	d__Bacteria;p__Actinobacteriota;c__Actinobacteria;o__Actinomycetales;f__Micrococcaceae;g__Kocuria	s__Kocuria flava
GCF_001483385.1	NZ_CP013671.1	99.11	2918253	2918253	d__Bacteria;p__Bacteroidota;c__Bacteroidia;o__Flavobacteriales;f__Flavobacteriaceae;g__Tenacibaculum	s__Tenacibaculum dicentrarchi_C
GCF_001483865.1	NZ_CP013729.1	100	5681722	5681722	d__Bacteria;p__Proteobacteria;c__Gammaproteobacteria;o__Burkholderiales;f__Burkholderiaceae;g__Roseateles	s__Roseateles depolymerans
GCF_001483965.1	NZ_CP010796.1	99.45	2614401	2605518	d__Bacteria;p__Firmicutes;c__Bacilli;o__Lactobacillales;f__Carnobacteriaceae;g__Carnobacterium_A	s__Carnobacterium_A sp001483965
GCF_001484045.1	NZ_CP013128.1	90.23	647830	647830	d__Bacteria;p__Firmicutes;c__Bacilli;o__Mycoplasmatales;f__GCF-1484045;g__GCF-1484045	s__GCF-1484045 sp001484045
GCF_001484565.1	NZ_CP013743.1	100	10191567	9902731	d__Bacteria;p__Actinobacteriota;c__Actinobacteria;o__Streptomycetales;f__Streptomycetaceae;g__Streptomyces	s__Streptomyces sp001484565
GCF_001484605.1	NZ_CP013747.1	99.71	5056151	5043757	d__Bacteria;p__Actinobacteriota;c__Actinobacteria;o__Actinomycetales;f__Micrococcaceae;g__Pseudarthrobacter_A	s__Pseudarthrobacter_A sulfonivorans
GCF_001499655.1	NZ_LN879502.1	100	3030375	2885090	d__Bacteria;p__Verrucomicrobiota_A;c__Chlamydiia;o__Parachlamydiales;f__Parachlamydiaceae;g__Protochlamydia	s__Protochlamydia naegleriophila
GCF_001506165.1	NZ_CP011427.1	100	4313264	4313264	d__Bacteria;p__Proteobacteria;c__Gammaproteobacteria;o__Enterobacterales;f__Enterobacteriaceae;g__Pantoea	s__Pantoea vagans_C
GCF_001507645.1	NZ_CP013909.1	99.4	4868852	4868852	d__Bacteria;p__Bacteroidota;c__Bacteroidia;o__Cytophagales;f__Hymenobacteraceae;g__Hymenobacter	s__Hymenobacter sedentarius
GCF_001507665.1	NZ_CP013910.1	99.15	3264334	3264334	d__Bacteria;p__Deinococcota;c__Deinococci;o__Deinococcales;f__Deinococcaceae;g__Deinococcus	s__Deinococcus actinosclerus
GCF_001509405.1	NZ_CP011502.1	99.48	3629239	3629239	d__Bacteria;p__Actinobacteriota;c__Actinobacteria;o__Propionibacteriales;f__Nocardioidaceae;g__Aeromicrobium	s__Aeromicrobium erythreum
GCF_001511755.1	NZ_LN854573.1	99.93	6374437	6374437	d__Bacteria;p__Proteobacteria;c__Gammaproteobacteria;o__Pseudomonadales;f__Pseudomonadaceae;g__Pseudomonas_E	s__Pseudomonas_E sp001511755
GCF_001511835.1	NZ_LN997848.1	99.5	4992477	4825187	d__Bacteria;p__Proteobacteria;c__Alphaproteobacteria;o__Rhodospirillales_B;f__Magnetospirillaceae;g__Magnetospirillum_A	s__Magnetospirillum_A sp001511835
GCF_001513675.1	NZ_CP013859.1	99.49	3475315	3475315	d__Bacteria;p__Actinobacteriota;c__Actinobacteria;o__Actinomycetales;f__Microbacteriaceae;g__Microbacterium	s__Microbacterium sp001513675
GCF_001517405.1	NZ_LN907827.1	100	4481256	3775020	d__Bacteria;p__Proteobacteria;c__Gammaproteobacteria;o__Enterobacterales;f__Enterobacteriaceae;g__Erwinia_B	s__Erwinia_B gerundensis
GCF_001518815.1	NZ_CP013987.1	98.53	4834356	4834356	d__Bacteria;p__Proteobacteria;c__Gammaproteobacteria;o__Pseudomonadales;f__Pseudomonadaceae;g__Pseudomonas_B	s__Pseudomonas_B oryzihabitans_E
GCF_001521715.1	NZ_CP011863.1	98.97	4806219	4713742	d__Bacteria;p__Proteobacteria;c__Gammaproteobacteria;o__Enterobacterales;f__Enterobacteriaceae;g__Enterobacter	s__Enterobacter asburiae
GCF_001534665.1	NZ_CP013920.1	80.63	836724	836724	d__Bacteria;p__Proteobacteria;c__Gammaproteobacteria;o__Enterobacterales;f__Enterobacteriaceae;g__Arsenophonus_A	s__Arsenophonus_A lipoptenae
GCF_001534745.1	NZ_CP013997.1	99.57	4714359	4714359	d__Bacteria;p__Proteobacteria;c__Gammaproteobacteria;o__Pseudomonadales;f__Pseudomonadaceae;g__Pseudomonas_E	s__Pseudomonas_E monteilii_A
GCF_001534765.1	NZ_CP013217.1	99.34	2964527	2964527	d__Bacteria;p__Firmicutes;c__Bacilli;o__Bacillales_A;f__Planococcaceae;g__Kurthia	s__Kurthia sp001534765
GCF_001535545.1	NZ_CP014141.1	95.76	2016098	1872821	d__Bacteria;p__Deinococcota;c__Deinococci;o__Deinococcales;f__Thermaceae;g__Thermus	s__Thermus parvatiensis
GCF_001542565.1	NZ_CP014196.1	99.71	4434904	4434904	d__Bacteria;p__Actinobacteriota;c__Actinobacteria;o__Actinomycetales;f__Micrococcaceae;g__Paenarthrobacter	s__Paenarthrobacter sp001542565
GCF_001542625.1	NZ_CP016279.1	99.46	10764674	10764674	d__Bacteria;p__Actinobacteriota;c__Actinobacteria;o__Streptomycetales;f__Streptomycetaceae;g__Streptomyces	s__Streptomyces griseochromogenes
GCF_001542775.1	NZ_CP014145.1	98.91	3689726	3689726	d__Bacteria;p__Actinobacteriota;c__Actinobacteria;o__Actinomycetales;f__Microbacteriaceae;g__Microterricola	s__Microterricola viridarii_A
GCF_001542815.1	NZ_CP006992.1	99.69	5599206	5435450	d__Bacteria;p__Proteobacteria;c__Alphaproteobacteria;o__Rhizobiales;f__Beijerinckiaceae;g__Methylobacterium	s__Methylobacterium sp001542815
GCF_001543105.1	NZ_CP014159.1	98.26	1634920	1634920	d__Bacteria;p__Firmicutes;c__Bacilli;o__Lactobacillales;f__Aerococcaceae;g__Aerococcus	s__Aerococcus christensenii
GCF_001543145.1	NZ_CP014160.1	98.72	2033849	2033849	d__Bacteria;p__Firmicutes;c__Bacilli;o__Lactobacillales;f__Aerococcaceae;g__Aerococcus	s__Aerococcus sanguinicola
GCF_001543175.1	NZ_CP014161.1	99.59	1974262	1974262	d__Bacteria;p__Firmicutes;c__Bacilli;o__Lactobacillales;f__Aerococcaceae;g__Aerococcus	s__Aerococcus urinae
GCF_001543205.1	NZ_CP014162.1	98.35	2013339	2013339	d__Bacteria;p__Firmicutes;c__Bacilli;o__Lactobacillales;f__Aerococcaceae;g__Aerococcus	s__Aerococcus urinaeequi
GCF_001543245.1	NZ_CP014163.1	97.8	1831400	1831400	d__Bacteria;p__Firmicutes;c__Bacilli;o__Lactobacillales;f__Aerococcaceae;g__Aerococcus	s__Aerococcus urinaehominis
GCF_001543285.1	NZ_CP014164.1	98.9	2199877	2199877	d__Bacteria;p__Firmicutes;c__Bacilli;o__Lactobacillales;f__Aerococcaceae;g__Aerococcus	s__Aerococcus viridans
GCF_001543325.1	NZ_CP013355.1	97.38	2966978	2966978	d__Bacteria;p__Bacteroidota;c__Bacteroidia;o__Flavobacteriales;f__Flavobacteriaceae;g__Lutibacter	s__Lutibacter profundi
GCF_001543345.1	NZ_CP013476.1	91.6	2622031	2622031	d__Bacteria;p__Firmicutes;c__Bacilli;o__Haloplasmatales;f__Turicibacteraceae;g__Turicibacter	s__Turicibacter sp001543345
GCF_001544015.1	NZ_AP014924.1	92.16	3817036	3817036	d__Bacteria;p__Firmicutes_G;c__Limnochordia;o__Limnochordales;f__Limnochordaceae;g__Limnochorda	s__Limnochorda pilosa
GCF_001545095.1	NZ_CP013213.1	98.82	2511486	2495108	d__Bacteria;p__Firmicutes;c__Bacilli;o__Erysipelotrichales;f__Erysipelotrichaceae;g__Erysipelothrix	s__Erysipelothrix larvae
GCF_001545155.1	NZ_CP014226.1	98.91	3973651	3973651	d__Bacteria;p__Proteobacteria;c__Gammaproteobacteria;o__Pseudomonadales;f__Halomonadaceae;g__Halomonas	s__Halomonas chromatireducens
GCF_001547735.1	NZ_AP013035.1	98.17	1816670	1816670	d__Bacteria;p__Thermosulfidibacterota;c__Thermosulfidibacteria;o__Thermosulfidibacterales;f__Thermosulfidibacteraceae;g__Thermosulfidibacter	s__Thermosulfidibacter takaii
GCF_001547755.1	NZ_AP013042.1	98.68	1469434	1469434	d__Bacteria;p__Proteobacteria;c__Gammaproteobacteria;o__Thiomicrospirales;f__Thioglobaceae;g__GCF1875585	s__GCF1875585 sp001547755
GCF_001547895.1	NZ_AP014627.1	99.38	6885464	6885464	d__Bacteria;p__Proteobacteria;c__Gammaproteobacteria;o__Pseudomonadales;f__Pseudomonadaceae;g__Pseudomonas_E	s__Pseudomonas_E sp001547895
GCF_001547975.1	NZ_AP014657.1	99.62	678592	678592	d__Bacteria;p__Firmicutes;c__Bacilli;o__Mycoplasmatales;f__Metamycoplasmataceae;g__Metamycoplasma	s__Metamycoplasma arginini
GCF_001547995.1	NZ_AP014690.1	99.75	3198265	3198265	d__Bacteria;p__Proteobacteria;c__Alphaproteobacteria;o__Acetobacterales;f__Acetobacteraceae;g__Asaia	s__Asaia bogorensis
GCF_001548015.1	NZ_AP014704.1	100	7557960	5348274	d__Bacteria;p__Proteobacteria;c__Alphaproteobacteria;o__Rhizobiales;f__Beijerinckiaceae;g__Methylobacterium	s__Methylobacterium aquaticum_B
GCF_001548035.1	NZ_AP014723.1	99.87	2606563	2606563	d__Bacteria;p__Campylobacterota;c__Campylobacteria;o__Campylobacterales;f__Sulfurospirillaceae;g__Sulfurospirillum	s__Sulfurospirillum sp001548035
GCF_001548055.1	NZ_AP014724.1	100	2698323	2698323	d__Bacteria;p__Campylobacterota;c__Campylobacteria;o__Campylobacterales;f__Sulfurospirillaceae;g__Sulfurospirillum	s__Sulfurospirillum cavolei
GCF_001548095.1	NZ_AP014815.1	99.78	4042078	3883409	d__Bacteria;p__Cyanobacteria;c__Cyanobacteriia;o__Cyanobacteriales;f__Cyanobacteriaceae;g__Geminocystis	s__Geminocystis sp001548095
GCF_001548115.1	NZ_AP014821.1	99.78	4426059	4150181	d__Bacteria;p__Cyanobacteria;c__Cyanobacteriia;o__Cyanobacteriales;f__Cyanobacteriaceae;g__Geminocystis	s__Geminocystis sp001548115
GCF_001548235.1	NZ_AP014938.1	99.33	2292716	2292716	d__Bacteria;p__Actinobacteriota;c__Actinobacteria;o__Actinomycetales;f__Micrococcaceae;g__Rothia	s__Rothia mucilaginosa_B
GCF_001548275.1	NZ_AP014945.1	97.94	1814952	1814952	d__Bacteria;p__Desulfobacterota;c__Thermodesulfobacteria;o__Thermodesulfobacteriales;f__Thermodesulfobacteriaceae;g__Caldimicrobium	s__Caldimicrobium thiodismutans
GCF_001548375.1	NZ_AP017295.1	99.3	6987571	6463965	d__Bacteria;p__Cyanobacteria;c__Cyanobacteriia;o__Cyanobacteriales;f__Nostocaceae;g__Trichormus	s__Trichormus sp001548375
GCF_001548395.1	NZ_AP017367.1	98.7	5480261	5480261	d__Bacteria;p__Cyanobacteria;c__Cyanobacteriia;o__Elainellales;f__Elainellaceae;g__O-77	s__O-77 sp001548395
GCF_001548435.1	NZ_AP017308.1	99.41	6761657	6244812	d__Bacteria;p__Cyanobacteria;c__Cyanobacteriia;o__Leptolyngbyales;f__Leptolyngbyaceae;g__Leptolyngbya	s__Leptolyngbya sp001548435
GCF_001553195.1	NZ_CP014281.1	100	897443	897443	d__Bacteria;p__Firmicutes;c__Bacilli;o__Mycoplasmatales;f__Metamycoplasmataceae;g__Mycoplasmopsis_A	s__Mycoplasmopsis_A canis
GCF_001553545.1	NZ_CP014227.1	100	2688484	2688484	d__Bacteria;p__Bacteroidota;c__Bacteroidia;o__Flavobacteriales;f__Flavobacteriaceae;g__Capnocytophaga	s__Capnocytophaga haemolytica
GCF_001553565.1	NZ_CP014228.1	100	3051613	3051613	d__Bacteria;p__Actinobacteriota;c__Actinobacteria;o__Actinomycetales;f__Actinomycetaceae;g__Actinomyces	s__Actinomyces radicidentis
GCF_001553605.1	NZ_CP014229.1	99.41	3699310	3699310	d__Bacteria;p__Desulfobacterota_A;c__Desulfovibrionia;o__Desulfovibrionales;f__Desulfovibrionaceae;g__Desulfovibrio	s__Desulfovibrio fairfieldensis
GCF_001553625.1	NZ_CP014230.1	98.51	2783374	2783374	d__Bacteria;p__Desulfobacterota_A;c__Desulfovibrionia;o__Desulfovibrionales;f__Desulfomicrobiaceae;g__Desulfomicrobium	s__Desulfomicrobium orale
GCF_001553645.1	NZ_CP014231.1	100	2194935	2194935	d__Bacteria;p__Fusobacteriota;c__Fusobacteriia;o__Fusobacteriales;f__Leptotrichiaceae;g__Leptotrichia	s__Leptotrichia sp001553645
GCF_001553685.1	NZ_CP014264.1	99.96	2177905	2177905	d__Bacteria;p__Firmicutes;c__Bacilli;o__Lactobacillales;f__Streptococcaceae;g__Streptococcus	s__Streptococcus sp001553685
GCF_001553935.1	NZ_CP014232.1	99.76	3042917	3042917	d__Bacteria;p__Actinobacteriota;c__Actinobacteria;o__Actinomycetales;f__Actinomycetaceae;g__Actinomyces	s__Actinomyces oris_A
GCF_001553955.1	NZ_CP014234.1	99.71	2649137	2434688	d__Bacteria;p__Proteobacteria;c__Gammaproteobacteria;o__Pseudomonadales;f__Moraxellaceae;g__Moraxella_A	s__Moraxella_A osloensis
GCF_001558935.2	NZ_CP014070.2	99.97	5084037	5030678	d__Bacteria;p__Proteobacteria;c__Gammaproteobacteria;o__Enterobacterales;f__Enterobacteriaceae;g__Citrobacter_A	s__Citrobacter_A amalonaticus_D
GCF_001560895.1	NZ_CP014326.1	99.82	2167922	2167922	d__Bacteria;p__Firmicutes;c__Bacilli;o__Lactobacillales;f__Streptococcaceae;g__Streptococcus	s__Streptococcus mitis_Q
GCF_001561955.1	NZ_CP014223.1	96.64	3120417	3120417	d__Bacteria;p__Firmicutes_A;c__Clostridia;o__Lachnospirales;f__Anaerotignaceae;g__Anaerotignum	s__Anaerotignum propionicum
GCF_001562115.1	NZ_CP013926.1	99.5	4904192	4652019	d__Bacteria;p__Proteobacteria;c__Gammaproteobacteria;o__Enterobacterales;f__Alteromonadaceae;g__Alteromonas	s__Alteromonas stellipolaris
GCF_001562255.1	NZ_CP014301.1	98.96	5510355	5503156	d__Bacteria;p__Proteobacteria;c__Alphaproteobacteria;o__Rhizobiales;f__Beijerinckiaceae;g__Bosea	s__Bosea sp001562255
GCF_001562275.1	NZ_CP014304.1	99.37	5366977	5277381	d__Bacteria;p__Bacteroidota;c__Bacteroidia;o__Cytophagales;f__Hymenobacteraceae;g__Hymenobacter	s__Hymenobacter sp001562275
GCF_001563225.1	NZ_CP014206.1	98.82	3966573	3966573	d__Bacteria;p__Desulfobacterota_A;c__Desulfovibrionia;o__Desulfovibrionales;f__Desulfovibrionaceae;g__Pseudodesulfovibrio	s__Pseudodesulfovibrio indicus
GCF_001564455.1	NZ_CP011391.1	98.11	2542486	2542486	d__Bacteria;p__Firmicutes;c__Bacilli;o__Erysipelotrichales;f__Erysipelotrichaceae;g__Faecalibaculum	s__Faecalibaculum rodentium
GCF_001577265.1	NZ_CP014517.1	100	4316152	4316152	d__Bacteria;p__Proteobacteria;c__Gammaproteobacteria;o__Burkholderiales;f__Burkholderiaceae;g__Variovorax	s__Variovorax sp001577265
GCF_001577305.1	NZ_CP014518.1	98.32	4492204	4410241	d__Bacteria;p__Actinobacteriota;c__Actinobacteria;o__Actinomycetales;f__Micrococcaceae;g__Sinomonas	s__Sinomonas atrocyanea
GCF_001577365.1	NZ_CP014513.1	96.74	4766863	4345897	d__Bacteria;p__Actinobacteriota;c__Actinobacteria;o__Actinomycetales;f__Microbacteriaceae;g__Frondihabitans	s__Frondihabitans sp001577365
GCF_001577755.1	NZ_CP010776.1	99.63	4143738	4143738	d__Bacteria;p__Bacteroidota;c__Bacteroidia;o__Cytophagales;f__Hymenobacteraceae;g__Rufibacter	s__Rufibacter sp001577755
GCF_001578105.1	NZ_CP014275.1	99.22	5036008	4554702	d__Bacteria;p__Proteobacteria;c__Alphaproteobacteria;o__Rhizobiales;f__Rhizobiaceae;g__Martelella	s__Martelella sp001578105
GCF_001578185.1	NZ_CP011008.1	98.91	5521719	5345500	d__Bacteria;p__Firmicutes;c__Bacilli;o__Bacillales;f__Bacillaceae_A;g__Bacillus_X	s__Bacillus_X simplex_A
GCF_001579805.1	NZ_CP014546.1	99.36	6859618	6859618	d__Bacteria;p__Proteobacteria;c__Gammaproteobacteria;o__Pseudomonadales;f__Pseudomonadaceae;g__Pseudomonas_E	s__Pseudomonas_E azotoformans_A
GCF_001579845.1	NZ_CP007440.1	98.73	8193889	8193889	d__Bacteria;p__Proteobacteria;c__Alphaproteobacteria;o__Rhizobiales;f__Xanthobacteraceae;g__Z2-YC6860	s__Z2-YC6860 sp001579845
GCF_001579945.1	NZ_CP011971.1	97.1	3467246	3467246	d__Bacteria;p__Proteobacteria;c__Gammaproteobacteria;o__Steroidobacterales;f__Steroidobacteraceae;g__Steroidobacter	s__Steroidobacter denitrificans
GCF_001580455.1	NZ_CP010951.1	99.61	4916630	4916630	d__Bacteria;p__Proteobacteria;c__Gammaproteobacteria;o__Burkholderiales;f__Burkholderiaceae;g__Ramlibacter	s__Ramlibacter tataouinensis_B
GCF_001583415.1	NZ_CP014475.1	100	5349645	5349645	d__Bacteria;p__Actinobacteriota;c__Actinobacteria;o__Mycobacteriales;f__Mycobacteriaceae;g__Mycolicibacterium	s__Mycolicibacterium phlei
GCF_001584145.1	NZ_CP013232.1	99.87	5599729	5599729	d__Bacteria;p__Proteobacteria;c__Gammaproteobacteria;o__Burkholderiales;f__Burkholderiaceae;g__Collimonas	s__Collimonas fungivorans
GCF_001584165.1	NZ_CP013233.1	98.1	4723987	4723987	d__Bacteria;p__Proteobacteria;c__Gammaproteobacteria;o__Burkholderiales;f__Burkholderiaceae;g__Collimonas	s__Collimonas arenae
GCF_001584185.1	NZ_CP013234.1	99.28	5730025	5730025	d__Bacteria;p__Proteobacteria;c__Gammaproteobacteria;o__Burkholderiales;f__Burkholderiaceae;g__Collimonas	s__Collimonas pratensis
GCF_001584725.1	NZ_CP014606.1	72.38	1622248	1586453	d__Bacteria;p__Firmicutes_B;c__TC1;o__TC1;f__TC1;g__TC1	s__TC1 sp001584725
GCF_001586135.1	NZ_CP014702.1	99.94	5463256	3579824	d__Bacteria;p__Proteobacteria;c__Gammaproteobacteria;o__Burkholderiales;f__Burkholderiaceae;g__Ralstonia	s__Ralstonia solanacearum_A
GCF_001586165.1	NZ_CP014608.1	99.67	5011796	5011796	d__Bacteria;p__Proteobacteria;c__Gammaproteobacteria;o__Enterobacterales;f__Enterobacteriaceae;g__Hafnia	s__Hafnia proteus
GCF_001586195.1	NZ_CP014609.1	100	3991226	3991226	d__Bacteria;p__Firmicutes;c__Bacilli;o__Bacillales_A;f__Planococcaceae;g__Solibacillus	s__Solibacillus silvestris
GCF_001586215.1	NZ_CP014634.1	99.56	2737971	2737971	d__Bacteria;p__Actinobacteriota;c__Actinobacteria;o__Mycobacteriales;f__Mycobacteriaceae;g__Corynebacterium	s__Corynebacterium simulans
GCF_001586255.1	NZ_CP014544.1	100	4204359	4204359	d__Bacteria;p__Proteobacteria;c__Gammaproteobacteria;o__Pseudomonadales;f__Spongiibacteraceae;g__Zhongshania	s__Zhongshania aliphaticivorans
GCF_001586275.1	NZ_CP014545.1	98.85	3339521	3339521	d__Bacteria;p__Proteobacteria;c__Alphaproteobacteria;o__Sphingomonadales;f__Sphingomonadaceae;g__Sphingorhabdus	s__Sphingorhabdus sp001586275
GCF_001587175.1	NZ_CP013651.1	99.66	1874337	1874337	d__Bacteria;p__Firmicutes;c__Bacilli;o__Lactobacillales;f__Streptococcaceae;g__Streptococcus	s__Streptococcus sp001587175
GCF_001590605.1	NZ_CP014504.1	100	5950539	5950539	d__Bacteria;p__Bacteroidota;c__Bacteroidia;o__Sphingobacteriales;f__Sphingobacteriaceae;g__Pedobacter	s__Pedobacter cryoconitis_A
GCF_001590685.1	NZ_CP014616.1	98.68	4674191	4674191	d__Bacteria;p__Firmicutes;c__Bacilli;o__Bacillales_A;f__Planococcaceae;g__Sporosarcina_C	s__Sporosarcina_C psychrophila
GCF_001593285.1	NZ_CP012529.1	99.58	3366617	3321751	d__Bacteria;p__Proteobacteria;c__Gammaproteobacteria;o__Pseudomonadales;f__Moraxellaceae;g__Psychrobacter	s__Psychrobacter sp001593285
GCF_001593605.1	NZ_CP012836.1	100	3882610	3882610	d__Bacteria;p__Bacteroidota;c__Bacteroidia;o__Cytophagales;f__Cyclobacteriaceae;g__Algoriphagus	s__Algoriphagus sp001593605
GCF_001595725.1	NZ_CP014282.1	98.86	6390500	5243635	d__Bacteria;p__Firmicutes;c__Bacilli;o__Bacillales;f__Bacillaceae_G;g__Bacillus_A	s__Bacillus_A thuringiensis_K
GCF_001596135.1	NZ_CP014773.1	97.86	5618021	5611374	d__Bacteria;p__Bacteroidota;c__Bacteroidia;o__Sphingobacteriales;f__Sphingobacteriaceae;g__Mucilaginibacter	s__Mucilaginibacter sp001596135
GCF_001596155.1	NZ_CP014771.1	99.67	5451254	5244843	d__Bacteria;p__Bacteroidota;c__Bacteroidia;o__Cytophagales;f__Hymenobacteraceae;g__Hymenobacter	s__Hymenobacter sp001596155
GCF_001598035.1	NZ_CP014835.1	97.38	2182100	2182100	d__Bacteria;p__Firmicutes;c__Bacilli;o__Lactobacillales;f__Streptococcaceae;g__Streptococcus	s__Streptococcus halotolerans
GCF_001602095.1	NZ_CP014991.1	98.55	1829936	1829936	d__Bacteria;p__Campylobacterota;c__Campylobacteria;o__Campylobacterales;f__Helicobacteraceae;g__Helicobacter_F	s__Helicobacter_F himalayensis
GCF_001605015.1	NZ_CP015005.1	99.3	6890726	5623946	d__Bacteria;p__Proteobacteria;c__Alphaproteobacteria;o__Rhizobiales;f__Rhizobiaceae;g__Aminobacter	s__Aminobacter aminovorans
GCF_001605725.1	NZ_CP011530.1	99.61	5573781	5573781	d__Bacteria;p__Actinobacteriota;c__Actinobacteria;o__Mycobacteriales;f__Mycobacteriaceae;g__Mycobacteroides	s__Mycobacteroides immunogenum
GCF_001605965.1	NZ_CP014947.1	99.93	6301761	6301761	d__Bacteria;p__Proteobacteria;c__Gammaproteobacteria;o__Pseudomonadales;f__Pseudomonadaceae;g__Pseudomonas_E	s__Pseudomonas_E koreensis_C
GCF_001606025.1	NZ_CP014945.1	99.73	3349444	3332539	d__Bacteria;p__Proteobacteria;c__Gammaproteobacteria;o__Pseudomonadales;f__Moraxellaceae;g__Psychrobacter	s__Psychrobacter alimentarius
GCF_001610835.1	NZ_CP011270.1	98.89	8442773	8442773	d__Bacteria;p__Planctomycetota;c__Planctomycetes;o__Planctomycetales;f__Planctomycetaceae;g__Planctomyces_A	s__Planctomyces_A sp001610835
GCF_001610895.1	NZ_CP011273.1	98.45	6784659	6507102	d__Bacteria;p__Planctomycetota;c__Planctomycetes;o__Isosphaerales;f__Isosphaeraceae;g__Paludisphaera	s__Paludisphaera sp001610895
GCF_001610955.1	NZ_CP014335.1	99.44	3499317	3450609	d__Bacteria;p__Firmicutes;c__Bacilli;o__Bacillales;f__Anoxybacillaceae;g__Geobacillus	s__Geobacillus thermoleovorans
GCF_001611275.1	NZ_CP015080.1	99.35	3924652	3924652	d__Bacteria;p__Desulfuromonadota;c__Desulfuromonadia;o__Desulfuromonadales;f__DDH964;g__DDH964	s__DDH964 sp001611275
GCF_001611675.1	NZ_CP014766.1	100	4829559	4713421	d__Bacteria;p__Bacteroidota;c__Bacteroidia;o__Cytophagales;f__Hymenobacteraceae;g__Pontibacter	s__Pontibacter akesuensis
GCF_001611975.1	NZ_CP014525.1	95.02	2467625	2131542	d__Bacteria;p__Proteobacteria;c__Alphaproteobacteria;o__Rhodospirillales;f__Rhodospirillaceae;g__Haematospirillum	s__Haematospirillum jordaniae
GCF_001612555.1	NZ_CP015110.1	100	3691287	3383728	d__Bacteria;p__Proteobacteria;c__Gammaproteobacteria;o__Pseudomonadales;f__Moraxellaceae;g__Acinetobacter	s__Acinetobacter sp001612555
GCF_001617605.1	NZ_CP014806.1	99.34	3420739	3412092	d__Bacteria;p__Firmicutes;c__Bacilli;o__Bacillales_A;f__Planococcaceae;g__Rummeliibacillus	s__Rummeliibacillus stabekisii
GCF_001618685.1	NZ_CP014342.1	99.44	3474426	3474426	d__Bacteria;p__Firmicutes;c__Bacilli;o__Bacillales;f__Anoxybacillaceae;g__Geobacillus	s__Geobacillus subterraneus
GCF_001618865.1	NZ_CP015136.1	97.44	7480314	7480314	d__Bacteria;p__Acidobacteriota;c__Vicinamibacteria;o__Vicinamibacterales;f__Vicinamibacteraceae;g__Luteitalea	s__Luteitalea pratensis
GCF_001618885.1	NZ_CP015114.1	98.9	2659676	2659676	d__Bacteria;p__Firmicutes;c__Bacilli;o__Staphylococcales;f__Staphylococcaceae;g__Staphylococcus	s__Staphylococcus condimenti
GCF_001620265.1	NZ_CP012661.1	98.36	4987611	4738298	d__Bacteria;p__Proteobacteria;c__Alphaproteobacteria;o__Rhodobacterales;f__Rhodobacteraceae;g__Defluviimonas_B	s__Defluviimonas_B alba
GCF_001623565.1	NZ_CP015196.1	100	2322791	2309282	d__Bacteria;p__Firmicutes;c__Bacilli;o__Lactobacillales;f__Streptococcaceae;g__Streptococcus	s__Streptococcus marmotae
GCF_001628715.1	NZ_CP011120.1	100	3106397	2799488	d__Bacteria;p__Proteobacteria;c__Alphaproteobacteria;o__Acetobacterales;f__Acetobacteraceae;g__Acetobacter	s__Acetobacter oryzifermentans
GCF_001628815.1	NZ_CP014963.1	97.85	3666014	3555507	d__Bacteria;p__Desulfuromonadota;c__Desulfuromonadia;o__Geobacterales;f__Geobacteraceae;g__Geobacter	s__Geobacter anodireducens
GCF_001629705.1	NZ_CP015378.1	98.68	4230665	4230665	d__Bacteria;p__Firmicutes;c__Bacilli;o__Bacillales;f__Fictibacillaceae;g__Fictibacillus_B	s__Fictibacillus_B phosphorivorans_A
GCF_001629735.1	NZ_CP015224.1	99.34	4692801	4692801	d__Bacteria;p__Firmicutes;c__Bacilli;o__Bacillales_A;f__Planococcaceae;g__Lysinibacillus	s__Lysinibacillus sphaericus_A
GCF_001632775.1	NZ_CP015249.1	99.2	4446619	4446619	d__Bacteria;p__Proteobacteria;c__Gammaproteobacteria;o__Xanthomonadales;f__Rhodanobacteraceae;g__Dokdonella	s__Dokdonella koreensis
GCF_001632805.1	NZ_CP007220.1	98.83	5029817	5029817	d__Bacteria;p__Actinobacteriota;c__Actinobacteria;o__Mycobacteriales;f__Mycobacteriaceae;g__Mycobacteroides	s__Mycobacteroides chelonae
GCF_001632845.1	NZ_CP011994.1	99.94	3550080	3550080	d__Bacteria;p__Proteobacteria;c__Gammaproteobacteria;o__Ectothiorhodospirales;f__Ectothiorhodospiraceae;g__Ectothiorhodospira	s__Ectothiorhodospira sp001632845
GCF_001633165.1	NZ_CP015418.1	99.29	4347929	4132586	d__Bacteria;p__Proteobacteria;c__Alphaproteobacteria;o__Rhodobacterales;f__Rhodobacteraceae;g__Rhodovulum	s__Rhodovulum sulfidophilum
GCF_001634265.1	NZ_CP015435.1	99.44	3819480	3819480	d__Bacteria;p__Firmicutes;c__Bacilli;o__Bacillales;f__Anoxybacillaceae;g__Anoxybacillus_A	s__Anoxybacillus_A sp001634265
GCF_001634285.1	NZ_CP015438.1	99.44	3158269	2834744	d__Bacteria;p__Firmicutes;c__Bacilli;o__Bacillales;f__Anoxybacillaceae;g__Anoxybacillus_A	s__Anoxybacillus_A amylolyticus
GCF_001636015.1	NZ_CP011158.1	98.02	2306095	2265514	d__Bacteria;p__Proteobacteria;c__Gammaproteobacteria;o__Pseudomonadales;f__Moraxellaceae;g__Moraxella	s__Moraxella ovis
GCF_001636055.1	NZ_CP011789.1	100	5808624	5808624	d__Bacteria;p__Proteobacteria;c__Gammaproteobacteria;o__Pseudomonadales;f__Pseudomonadaceae;g__Pseudomonas_E	s__Pseudomonas_E putida_B
GCF_001636295.1	NZ_CP014209.1	100	3826972	3826972	d__Bacteria;p__Actinobacteriota;c__Actinobacteria;o__Actinomycetales;f__Cellulomonadaceae;g__Isoptericola	s__Isoptericola dokdonensis
GCF_001641285.1	NZ_CP014841.1	100	4227172	4227172	d__Bacteria;p__Proteobacteria;c__Gammaproteobacteria;o__Xanthomonadales;f__Rhodanobacteraceae;g__Dyella_A	s__Dyella_A thiooxydans
GCF_001642085.1	NZ_CP014699.1	98.88	2241302	2241302	d__Bacteria;p__Firmicutes;c__Bacilli;o__Lactobacillales;f__Streptococcaceae;g__Streptococcus	s__Streptococcus pantholopis
GCF_001642805.2	NZ_CP016948.1	99.77	5117644	5117644	d__Bacteria;p__Proteobacteria;c__Gammaproteobacteria;o__Enterobacterales;f__Enterobacteriaceae;g__Serratia	s__Serratia sp001642805
GCF_001642935.1	NZ_CP016761.1	98.68	4055461	4055461	d__Bacteria;p__Firmicutes;c__Bacilli;o__Bacillales;f__Fictibacillaceae;g__Fictibacillus_B	s__Fictibacillus_B arsenicus_B
GCF_001643015.1	NZ_CP015622.1	99.45	3217288	3047373	d__Bacteria;p__Actinobacteriota;c__Actinobacteria;o__Mycobacteriales;f__Mycobacteriaceae;g__Corynebacterium	s__Corynebacterium crudilactis
GCF_001643775.1	NZ_CP011402.1	100	2446250	2446250	d__Bacteria;p__Actinobacteriota;c__Coriobacteriia;o__Coriobacteriales;f__Eggerthellaceae;g__Denitrobacterium	s__Denitrobacterium detoxificans
GCF_001643975.1	NZ_CP015576.1	99.88	1753277	1753277	d__Bacteria;p__Campylobacterota;c__Campylobacteria;o__Campylobacterales;f__Campylobacteraceae;g__Campylobacter	s__Campylobacter hyointestinalis_A
GCF_001644565.1	NZ_CP011387.1	97.87	2971983	2971983	d__Bacteria;p__Deinococcota;c__Deinococci;o__Deinococcales;f__Deinococcaceae;g__Deinococcus	s__Deinococcus puniceus
GCF_001644575.1	NZ_CP015596.1	99.95	6053985	5801417	d__Bacteria;p__Actinobacteriota;c__Actinobacteria;o__Mycobacteriales;f__Mycobacteriaceae;g__Mycolicibacterium	s__Mycolicibacterium sp001644575
GCF_001644605.1	NZ_CP011388.1	99.19	5012599	5012599	d__Bacteria;p__Firmicutes_I;c__Bacilli_A;o__Paenibacillales;f__Paenibacillaceae;g__Paenibacillus_N	s__Paenibacillus_N swuensis
GCF_001644645.1	NZ_CP011390.1	100	5940863	5940863	d__Bacteria;p__Bacteroidota;c__Bacteroidia;o__Chitinophagales;f__Chitinophagaceae;g__Flavisolibacter_B	s__Flavisolibacter_B tropicus
GCF_001644665.1	NZ_CP011393.1	98.25	2061852	2061852	d__Bacteria;p__Thermotogota;c__Thermotogae;o__Thermotogales;f__Fervidobacteriaceae;g__Fervidobacterium	s__Fervidobacterium pennivorans_A
GCF_001644705.1	NZ_CP015137.1	99.99	4919833	4919833	d__Bacteria;p__Proteobacteria;c__Gammaproteobacteria;o__Enterobacterales;f__Enterobacteriaceae;g__Dickeya	s__Dickeya solani
GCF_001645685.2	NZ_CP017080.1	98.36	5007018	4919373	d__Bacteria;p__Firmicutes;c__Bacilli;o__Bacillales;f__Bacillaceae_A;g__Bacillus_X	s__Bacillus_X muralis_A
GCF_001647635.1	NZ_CP014761.1	99.24	3596761	3596761	d__Bacteria;p__Actinobacteriota;c__Actinobacteria;o__Actinomycetales;f__Microbacteriaceae;g__Leifsonia	s__Leifsonia xyli_A
GCF_001647675.1	NZ_CP015594.1	98.74	3048277	2738313	d__Bacteria;p__Proteobacteria;c__Gammaproteobacteria;o__Pseudomonadales;f__Moraxellaceae;g__Acinetobacter	s__Acinetobacter sp001647675
GCF_001647715.1	NZ_CP015600.1	99.93	6607040	6441449	d__Bacteria;p__Proteobacteria;c__Gammaproteobacteria;o__Pseudomonadales;f__Pseudomonadaceae;g__Pseudomonas_E	s__Pseudomonas_E antarctica_A
GCF_001648115.1	NZ_CP011299.1	97.18	607835	607835	d__Bacteria;p__Proteobacteria;c__Gammaproteobacteria;o__Enterobacterales;f__Enterobacteriaceae;g__Buchnera	s__Buchnera aphidicola_N
GCF_001648155.1	NZ_CP015199.1	100	4871648	4843645	d__Bacteria;p__Bacteroidota;c__Bacteroidia;o__Flavobacteriales;f__Weeksellaceae;g__Chryseobacterium	s__Chryseobacterium glaciei
GCF_001648175.1	NZ_CP015243.1	99.9	4387428	4387428	d__Bacteria;p__Proteobacteria;c__Gammaproteobacteria;o__Pseudomonadales;f__Halomonadaceae;g__Halotalea	s__Halotalea alkalilenta_A
GCF_001651805.1	NZ_CP015839.1	100	5191608	5191608	d__Bacteria;p__Proteobacteria;c__Gammaproteobacteria;o__Pseudomonadales;f__Nitrincolaceae;g__Marinobacterium_A	s__Marinobacterium_A aestuarii
GCF_001652465.1	NZ_CP015810.1	99.25	3168630	3117902	d__Bacteria;p__Actinobacteriota;c__Actinobacteria;o__Actinomycetales;f__Microbacteriaceae;g__Microbacterium	s__Microbacterium chocolatum
GCF_001652505.2	NZ_CP015774.2	99.94	4616122	4616122	d__Bacteria;p__Proteobacteria;c__Gammaproteobacteria;o__Enterobacterales;f__Enterobacteriaceae;g__Lelliottia	s__Lelliottia amnigena_A
GCF_001652565.1	NZ_CP015736.1	99.77	7354253	4678597	d__Bacteria;p__Proteobacteria;c__Alphaproteobacteria;o__Rhizobiales;f__Rhizobiaceae;g__Shinella	s__Shinella sp001652565
GCF_001653335.1	NZ_CP015079.1	99.18	4376707	4376707	d__Bacteria;p__Actinobacteriota;c__Actinobacteria;o__Propionibacteriales;f__Nocardioidaceae;g__Nocardioides	s__Nocardioides dokdonensis
GCF_001653455.1	NZ_CP011486.1	99.94	1570310	1570310	d__Bacteria;p__Campylobacterota;c__Campylobacteria;o__Campylobacterales;f__Helicobacteraceae;g__Helicobacter	s__Helicobacter pylori_A
GCF_001653755.1	NZ_CP015125.1	99.62	3293944	3293944	d__Bacteria;p__Bacteroidota;c__Bacteroidia;o__Flavobacteriales;f__Flavobacteriaceae;g__Dokdonia	s__Dokdonia donghaensis
GCF_001653795.1	NZ_CP011514.1	87.85	6085092	5822419	d__Bacteria;p__Proteobacteria;c__Gammaproteobacteria;o__Burkholderiales;f__Burkholderiaceae;g__Mitsuaria	s__Mitsuaria sp001653795
GCF_001653955.1	NZ_CP013022.1	93.17	1540768	1540768	d__Bacteria;p__Proteobacteria;c__Gammaproteobacteria;o__Francisellales;f__Francisellaceae;g__Francisella	s__Francisella persica
GCF_001654455.1	NZ_CP015772.1	100	5627734	5627734	d__Bacteria;p__Bacteroidota;c__Bacteroidia;o__Chitinophagales;f__Chitinophagaceae;g__Niabella	s__Niabella ginsenosidivorans
GCF_001654495.1	NZ_CP015849.1	100	7472530	7472530	d__Bacteria;p__Actinobacteriota;c__Actinobacteria;o__Streptomycetales;f__Streptomycetaceae;g__Streptomyces	s__Streptomyces sp001654495
GCF_001655595.1	NZ_CP011566.1	99.93	6427864	6427864	d__Bacteria;p__Proteobacteria;c__Gammaproteobacteria;o__Pseudomonadales;f__Pseudomonadaceae;g__Pseudomonas_E	s__Pseudomonas_E sp001655595
GCF_001655615.1	NZ_CP011567.1	99.93	6500345	6500345	d__Bacteria;p__Proteobacteria;c__Gammaproteobacteria;o__Pseudomonadales;f__Pseudomonadaceae;g__Pseudomonas_E	s__Pseudomonas_E sp001655615
GCF_001658025.1	NZ_CP014007.1	94.29	5303342	5303342	d__Bacteria;p__Proteobacteria;c__Gammaproteobacteria;o__Enterobacterales;f__Enterobacteriaceae;g__Kosakonia	s__Kosakonia oryzae
GCF_001659705.1	NZ_CP015971.1	87.14	3492500	3492500	d__Bacteria;p__Bacteroidota;c__Bacteroidia;o__Chitinophagales;f__Chitinophagaceae;g__Arachidicoccus	s__Arachidicoccus sp001659705
GCF_001659785.1	NZ_CP015961.1	97.65	3607892	3607892	d__Bacteria;p__Actinobacteriota;c__Actinobacteria;o__Mycobacteriales;f__Mycobacteriaceae;g__Dietzia	s__Dietzia timorensis
GCF_001660045.1	NZ_CP015866.1	100	7766531	7149446	d__Bacteria;p__Actinobacteriota;c__Actinobacteria;o__Streptomycetales;f__Streptomycetaceae;g__Streptomyces	s__Streptomyces parvulus
GCF_001660485.1	NZ_CP013979.1	100	4373124	4373124	d__Bacteria;p__Actinobacteriota;c__Actinobacteria;o__Actinomycetales;f__Microbacteriaceae;g__Agromyces	s__Agromyces aureus
GCF_001661075.1	NZ_CP014870.1	99.79	6823539	6823539	d__Bacteria;p__Proteobacteria;c__Gammaproteobacteria;o__Pseudomonadales;f__Pseudomonadaceae;g__Pseudomonas_E	s__Pseudomonas_E silesiensis
GCF_001661675.2	NZ_CP019602.1	99.59	4109188	3001363	d__Bacteria;p__Proteobacteria;c__Alphaproteobacteria;o__Sphingomonadales;f__Sphingomonadaceae;g__Croceicoccus	s__Croceicoccus marinus
GCF_001663155.1	NZ_CP015963.1	98.86	2673978	2673978	d__Bacteria;p__Proteobacteria;c__Alphaproteobacteria;o__Sphingomonadales;f__Sphingomonadaceae;g__Altererythrobacter	s__Altererythrobacter ishigakiensis
GCF_001663175.1	NZ_CP016033.1	99.48	3090363	3090363	d__Bacteria;p__Proteobacteria;c__Alphaproteobacteria;o__Sphingomonadales;f__Sphingomonadaceae;g__Porphyrobacter	s__Porphyrobacter neustonensis
GCF_001663675.1	NZ_CP014873.1	99.46	2851935	2672521	d__Bacteria;p__Firmicutes;c__Bacilli;o__Lactobacillales;f__Lactobacillaceae;g__Lactobacillus_E	s__Lactobacillus_E backii
GCF_001663815.1	NZ_CP016027.1	100	2908964	2908964	d__Bacteria;p__Proteobacteria;c__Gammaproteobacteria;o__Halothiobacillales;f__Halothiobacillaceae;g__Halothiobacillus	s__Halothiobacillus sp001663815
GCF_001664165.1	NZ_CP013585.1	99.94	6720332	4514436	d__Bacteria;p__Proteobacteria;c__Alphaproteobacteria;o__Rhizobiales;f__Rhizobiaceae;g__Rhizobium	s__Rhizobium phaseoli
GCF_001664485.1	NZ_CP013630.1	100	6972593	4640005	d__Bacteria;p__Proteobacteria;c__Alphaproteobacteria;o__Rhizobiales;f__Rhizobiaceae;g__Rhizobium	s__Rhizobium sp001664485
GCF_001676705.1	NZ_CP016170.1	100	5878756	5878756	d__Bacteria;p__Proteobacteria;c__Gammaproteobacteria;o__Burkholderiales;f__Burkholderiaceae;g__Bordetella_C	s__Bordetella_C bronchialis
GCF_001676725.1	NZ_CP016172.1	100	5954318	5835727	d__Bacteria;p__Proteobacteria;c__Gammaproteobacteria;o__Burkholderiales;f__Burkholderiaceae;g__Bordetella_C	s__Bordetella_C flabilis
GCF_001676785.2	NZ_CP015910.2	99.2	3074045	3041447	d__Bacteria;p__Spirochaetota;c__Brachyspirae;o__Brachyspirales;f__Brachyspiraceae;g__Brachyspira	s__Brachyspira hyodysenteriae
GCF_001677435.1	NZ_CP016268.1	90.99	4059891	4059891	d__Bacteria;p__Proteobacteria;c__Gammaproteobacteria;o__Woeseiales;f__Woeseiaceae;g__Woeseia	s__Woeseia oceani
GCF_001678905.1	NZ_CP012117.1	93.57	2392314	2392314	d__Bacteria;p__Actinobacteriota;c__Actinobacteria;o__Actinomycetales;f__Dermabacteraceae;g__Dermabacter_A	s__Dermabacter_A vaginalis
GCF_001678945.1	NZ_CP015124.1	99.57	4061725	4061725	d__Bacteria;p__Proteobacteria;c__Alphaproteobacteria;o__Rhodobacterales;f__Rhodobacteraceae;g__Pseudophaeobacter	s__Pseudophaeobacter gallaeciensis
GCF_001679665.1	NZ_CP013244.1	98.86	3732719	3732719	d__Bacteria;p__Proteobacteria;c__Alphaproteobacteria;o__Caulobacterales;f__Hyphomonadaceae;g__SWB02	s__SWB02 sp001679665
GCF_001679725.1	NZ_CP016282.1	99.49	4351229	4174501	d__Bacteria;p__Actinobacteriota;c__Actinobacteria;o__Actinomycetales;f__Microbacteriaceae;g__Cryobacterium	s__Cryobacterium arcticum_A
GCF_001682385.1	NZ_CP016210.1	99.94	4451751	4451751	d__Bacteria;p__Proteobacteria;c__Gammaproteobacteria;o__Burkholderiales;f__Rhodocyclaceae;g__Azoarcus_B	s__Azoarcus_B olearius
GCF_001685355.1	NZ_CP016438.1	99.75	10319054	10319054	d__Bacteria;p__Actinobacteriota;c__Actinobacteria;o__Streptomycetales;f__Streptomycetaceae;g__Streptomyces	s__Streptomyces lincolnensis
GCF_001685395.1	NZ_CP014167.1	99.56	4985901	4985901	d__Bacteria;p__Firmicutes_I;c__Bacilli_A;o__Paenibacillales;f__Paenibacillaceae;g__Paenibacillus_R	s__Paenibacillus_R yonginensis
GCF_001685415.1	NZ_CP014989.1	99.45	3597394	3597394	d__Bacteria;p__Actinobacteriota;c__Actinobacteria;o__Actinomycetales;f__Dermatophilaceae;g__Serinicoccus	s__Serinicoccus sp001685415
GCF_001686985.1	NZ_CP015318.1	99.92	7343952	6268270	d__Bacteria;p__Proteobacteria;c__Alphaproteobacteria;o__Rhizobiales;f__Rhizobiaceae;g__Mesorhizobium	s__Mesorhizobium amorphae_B
GCF_001687065.1	NZ_CP016432.1	98.9	2399849	2399849	d__Bacteria;p__Bacteroidota;c__Chlorobia;o__Chlorobiales;f__Chlorobiaceae;g__Prosthecochloris	s__Prosthecochloris sp001687065
GCF_001687545.1	NZ_CP016545.1	99.54	2591679	2591679	d__Bacteria;p__Proteobacteria;c__Alphaproteobacteria;o__Sphingomonadales;f__Sphingomonadaceae;g__Erythrobacter_E	s__Erythrobacter_E namhicola
GCF_001687565.2	NZ_CP016534.2	98.9	3804624	3765545	d__Bacteria;p__Firmicutes;c__Bacilli;o__Bacillales_A;f__Planococcaceae;g__Planococcus_A	s__Planococcus_A antarcticus
GCF_001687585.2	NZ_CP016537.2	99.34	3424893	3424893	d__Bacteria;p__Firmicutes;c__Bacilli;o__Bacillales_A;f__Planococcaceae;g__Planococcus_A	s__Planococcus_A halocryophilus
GCF_001687605.2	NZ_CP016539.2	99.34	3261818	3261818	d__Bacteria;p__Firmicutes;c__Bacilli;o__Bacillales_A;f__Planococcaceae;g__Planococcus_B	s__Planococcus_B plakortidis
GCF_001687625.2	NZ_CP016538.2	99.34	3280721	3280721	d__Bacteria;p__Firmicutes;c__Bacilli;o__Bacillales_A;f__Planococcaceae;g__Planococcus_B	s__Planococcus_B maritimus
GCF_001687665.2	NZ_CP016543.2	99.34	3319331	3305371	d__Bacteria;p__Firmicutes;c__Bacilli;o__Bacillales_A;f__Planococcaceae;g__Planococcus_A	s__Planococcus_A donghaensis
GCF_001688725.2	NZ_CP015401.2	88.92	4839927	4839927	d__Bacteria;p__Bacteroidota;c__Bacteroidia;o__Bacteroidales;f__Bacteroidaceae;g__Bacteroides	s__Bacteroides caecimuris
GCF_001693255.1	NZ_CP016474.1	100	3345085	3057091	d__Bacteria;p__Cyanobacteria;c__Cyanobacteriia;o__Cyanobacteriales;f__Limnotrichaceae;g__Limnothrix	s__Limnothrix sp001693255
GCF_001693275.1	NZ_CP016477.1	100	3432101	3087720	d__Bacteria;p__Cyanobacteria;c__Cyanobacteriia;o__Cyanobacteriales;f__Limnotrichaceae;g__Limnothrix	s__Limnothrix sp001693275
GCF_001693335.1	NZ_CP016503.1	95.42	1594790	1594790	d__Bacteria;p__Campylobacterota;c__Campylobacteria;o__Campylobacterales;f__Helicobacteraceae;g__Helicobacter_G	s__Helicobacter_G sp001693335
GCF_001693385.1	NZ_CP016428.1	99.9	8322773	8322773	d__Bacteria;p__Proteobacteria;c__Alphaproteobacteria;o__Rhizobiales;f__Xanthobacteraceae;g__Bradyrhizobium	s__Bradyrhizobium icense
GCF_001695755.1	NZ_CP016640.1	99.56	6579322	6395946	d__Bacteria;p__Actinobacteriota;c__Actinobacteria;o__Mycobacteriales;f__Mycobacteriaceae;g__Mycolicibacterium	s__Mycolicibacterium sp001695755
GCF_001697185.1	NZ_CP014224.1	96.85	3427057	3427057	d__Bacteria;p__Bacteroidota;c__Bacteroidia;o__Flavobacteriales;f__Flavobacteriaceae;g__Wenyingzhuangia	s__Wenyingzhuangia fucanilytica
GCF_001697225.1	NZ_CP014671.1	98.17	3243537	3243537	d__Bacteria;p__Proteobacteria;c__Gammaproteobacteria;o__Immundisolibacterales;f__Immundisolibacteraceae;g__Immundisolibacter	s__Immundisolibacter cernigliae
GCF_001698125.1	NZ_CP013854.1	98.33	6680451	6186048	d__Bacteria;p__Actinobacteriota;c__Actinobacteria;o__Mycobacteriales;f__Pseudonocardiaceae;g__Pseudonocardia	s__Pseudonocardia sp001698125
GCF_001698145.1	NZ_CP016598.1	100	1788069	1737502	d__Bacteria;p__Firmicutes;c__Bacilli;o__Lactobacillales;f__Lactobacillaceae;g__Leuconostoc	s__Leuconostoc lactis_B
GCF_001698205.1	NZ_CP016591.1	99.52	3009495	3009495	d__Bacteria;p__Proteobacteria;c__Alphaproteobacteria;o__Sphingomonadales;f__Sphingomonadaceae;g__Altererythrobacter_B	s__Altererythrobacter_B dongtanensis
GCF_001698225.1	NZ_CP016594.1	99.82	5701501	5701501	d__Bacteria;p__Actinobacteriota;c__Actinobacteria;o__Mycobacteriales;f__Mycobacteriaceae;g__Gordonia	s__Gordonia terrae
GCF_001700895.1	NZ_CP013259.1	100	636266	636266	d__Bacteria;p__Proteobacteria;c__Gammaproteobacteria;o__Enterobacterales;f__Enterobacteriaceae;g__Buchnera	s__Buchnera aphidicola_D
GCF_001700965.1	NZ_CP016756.1	99.86	4541729	4541729	d__Bacteria;p__Proteobacteria;c__Gammaproteobacteria;o__Xanthomonadales;f__Xanthomonadaceae;g__Stenotrophomonas	s__Stenotrophomonas nitritireducens_A
GCF_001701025.1	NZ_CP016793.1	99.03	9997872	9997872	d__Bacteria;p__Actinobacteriota;c__Actinobacteria;o__Mycobacteriales;f__Pseudonocardiaceae;g__Lentzea	s__Lentzea guizhouensis
GCF_001701045.1	NZ_CP016757.1	100	3585187	3585187	d__Bacteria;p__Synergistota;c__Synergistia;o__Synergistales;f__Synergistaceae;g__Cloacibacillus	s__Cloacibacillus porcorum
GCF_001704115.1	NZ_CP016895.1	99.71	3741098	3741098	d__Bacteria;p__Proteobacteria;c__Gammaproteobacteria;o__Pseudomonadales;f__Moraxellaceae;g__Acinetobacter	s__Acinetobacter larvae
GCF_001704155.1	NZ_CP016294.1	99.89	4198652	4198652	d__Bacteria;p__Proteobacteria;c__Gammaproteobacteria;o__Xanthomonadales;f__Xanthomonadaceae;g__Stenotrophomonas	s__Stenotrophomonas rhizophila_A
GCF_001704275.1	NZ_CP011533.1	99.91	9815884	9815884	d__Bacteria;p__Actinobacteriota;c__Actinobacteria;o__Streptomycetales;f__Streptomycetaceae;g__Streptomyces	s__Streptomyces noursei
GCF_001704295.1	NZ_CP012334.1	99.53	5532470	5532470	d__Bacteria;p__Proteobacteria;c__Gammaproteobacteria;o__Burkholderiales;f__Burkholderiaceae;g__Bordetella_C	s__Bordetella_C sp001704295
GCF_001708305.1	NZ_CP016953.1	99.44	2275471	2275471	d__Bacteria;p__Firmicutes;c__Bacilli;o__Lactobacillales;f__Streptococcaceae;g__Streptococcus	s__Streptococcus himalayensis
GCF_001708405.1	NZ_CP012418.1	100	2496140	2496140	d__Bacteria;p__Proteobacteria;c__Gammaproteobacteria;o__Enterobacterales;f__Kangiellaceae;g__Kangiella	s__Kangiella sediminilitoris
GCF_001708445.1	NZ_CP015637.1	99.93	6641144	6641144	d__Bacteria;p__Proteobacteria;c__Gammaproteobacteria;o__Pseudomonadales;f__Pseudomonadaceae;g__Pseudomonas_E	s__Pseudomonas_E fluorescens_AN
GCF_001708505.1	NZ_CP015992.1	99.35	6256697	6244007	d__Bacteria;p__Proteobacteria;c__Gammaproteobacteria;o__Pseudomonadales;f__Pseudomonadaceae;g__Pseudomonas_F	s__Pseudomonas_F sp001708505
GCF_001713355.1	NZ_CP016448.1	98.76	3937190	3937190	d__Bacteria;p__Proteobacteria;c__Gammaproteobacteria;o__Burkholderiales;f__Rhodocyclaceae;g__Methyloversatilis	s__Methyloversatilis sp001713355
GCF_001713375.1	NZ_CP016449.1	99.61	4674684	4674684	d__Bacteria;p__Proteobacteria;c__Gammaproteobacteria;o__Burkholderiales;f__Burkholderiaceae;g__Hydrogenophaga	s__Hydrogenophaga sp001713375
GCF_001713395.1	NZ_CP016450.1	100	6626583	4147868	d__Bacteria;p__Proteobacteria;c__Alphaproteobacteria;o__Rhizobiales;f__Rhizobiaceae;g__Shinella	s__Shinella sp001713395
GCF_001713415.1	NZ_CP016456.1	99.54	4369746	3232017	d__Bacteria;p__Proteobacteria;c__Alphaproteobacteria;o__Sphingomonadales;f__Sphingomonadaceae;g__Sphingobium	s__Sphingobium sp001713415
GCF_001713435.1	NZ_CP016460.1	99.54	4403499	3982627	d__Bacteria;p__Proteobacteria;c__Alphaproteobacteria;o__Sphingomonadales;f__Sphingomonadaceae;g__Blastomonas	s__Blastomonas sp001713435
GCF_001713455.1	NZ_CP016464.1	99.37	5620120	4911382	d__Bacteria;p__Proteobacteria;c__Alphaproteobacteria;o__Rhizobiales;f__Beijerinckiaceae;g__Bosea	s__Bosea sp001713455
GCF_001713475.1	NZ_CP016499.1	100	4964647	4641140	d__Bacteria;p__Proteobacteria;c__Alphaproteobacteria;o__Rhizobiales;f__Rhizobiaceae;g__Allorhizobium	s__Allorhizobium sp001713475
GCF_001714725.1	NZ_CP016447.1	99.56	4574859	4574859	d__Bacteria;p__Proteobacteria;c__Gammaproteobacteria;o__Burkholderiales;f__Burkholderiaceae;g__Acidovorax_D	s__Acidovorax_D sp001714725
GCF_001715535.1	NZ_CP017015.1	98.87	1326546	1326546	d__Bacteria;p__Firmicutes;c__Bacilli;o__Mycoplasmatales;f__Mycoplasmataceae;g__Spiroplasma_A	s__Spiroplasma_A helicoides
GCF_001717505.1	NZ_CP017037.1	96.11	1274073	1274073	d__Bacteria;p__Firmicutes_C;c__Negativicutes;o__Veillonellales;f__Dialisteraceae;g__Dialister_A	s__Dialister_A pneumosintes
GCF_001717545.1	NZ_CP017039.1	91.82	2945494	2945494	d__Bacteria;p__Chloroflexota;c__Anaerolineae;o__Anaerolineales;f__Anaerolineaceae;g__Flexilinea	s__Flexilinea sp001717545
GCF_001717585.1	NZ_CP017042.1	99.56	2440121	2374300	d__Bacteria;p__Firmicutes_C;c__Negativicutes;o__Selenomonadales;f__Selenomonadaceae;g__Centipeda	s__Centipeda sp001717585
GCF_001717955.1	NZ_CP014168.1	99.32	5322941	5003808	d__Bacteria;p__Proteobacteria;c__Alphaproteobacteria;o__Sphingomonadales;f__Sphingomonadaceae;g__Sphingomonas	s__Sphingomonas panacis
GCF_001719045.1	NZ_CP015423.1	99.85	5756938	5756938	d__Bacteria;p__Firmicutes_I;c__Bacilli_A;o__Paenibacillales;f__Paenibacillaceae;g__Paenibacillus	s__Paenibacillus polymyxa_B
GCF_001719165.1	NZ_CP017057.1	99.25	3251353	3251353	d__Bacteria;p__Proteobacteria;c__Alphaproteobacteria;o__Sphingomonadales;f__Sphingomonadaceae;g__Erythrobacter_D	s__Erythrobacter_D litoralis
GCF_001720465.1	NZ_CP017113.1	99.43	2979257	2979257	d__Bacteria;p__Proteobacteria;c__Alphaproteobacteria;o__Sphingomonadales;f__Sphingomonadaceae;g__Porphyrobacter	s__Porphyrobacter sp001720465
GCF_001720485.1	NZ_CP017114.1	98.71	4176400	4176400	d__Bacteria;p__Proteobacteria;c__Gammaproteobacteria;o__Pseudomonadales;f__Halomonadaceae;g__Cobetia	s__Cobetia marina
GCF_001721645.1	NZ_CP017141.1	100	6581659	6581659	d__Bacteria;p__Bacteroidota;c__Bacteroidia;o__Sphingobacteriales;f__Sphingobacteriaceae;g__Pedobacter	s__Pedobacter steynii_A
GCF_001721685.1	NZ_CP012502.1	99.34	3582268	3582268	d__Bacteria;p__Firmicutes;c__Bacilli;o__Bacillales;f__Salisediminibacteriaceae;g__Salisediminibacterium	s__Salisediminibacterium beveridgei
GCF_001723605.1	NZ_CP017111.1	100	3029840	3029840	d__Bacteria;p__Campylobacterota;c__Campylobacteria;o__Campylobacterales;f__Sulfurospirillaceae;g__Sulfurospirillum	s__Sulfurospirillum halorespirans
GCF_001729265.1	NZ_CP016044.1	99.42	3926767	3923603	d__Bacteria;p__Proteobacteria;c__Gammaproteobacteria;o__Enterobacterales;f__Enterobacteriaceae;g__Edwardsiella	s__Edwardsiella piscicida
GCF_001729765.1	NZ_CP017181.1	99.11	4927478	4880257	d__Bacteria;p__Proteobacteria;c__Gammaproteobacteria;o__Enterobacterales;f__Enterobacteriaceae;g__Enterobacter	s__Enterobacter kobei
GCF_001735715.1	NZ_CP017259.1	96.7	2016454	2016454	d__Bacteria;p__Bacteroidota;c__Bacteroidia;o__Flavobacteriales;f__Flavobacteriaceae;g__UBA3537	s__UBA3537 sp001735715
GCF_001735745.1	NZ_CP017260.1	97.69	2735158	2735158	d__Bacteria;p__Bacteroidota;c__Bacteroidia;o__Flavobacteriales;f__Flavobacteriaceae;g__Hel1-33-131	s__Hel1-33-131 sp001735745
GCF_001735765.2	NZ_CP017253.2	100	3503506	3264813	d__Bacteria;p__Firmicutes_A;c__Clostridia;o__Clostridiales;f__Clostridiaceae;g__Clostridium	s__Clostridium taeniosporum
GCF_001735805.1	NZ_CP017248.1	100	9698948	9698948	d__Bacteria;p__Actinobacteriota;c__Actinobacteria;o__Streptomycetales;f__Streptomycetaceae;g__Streptomyces	s__Streptomyces puniciscabiei
GCF_001741865.1	NZ_CP017147.1	99.69	6713548	6373793	d__Bacteria;p__Proteobacteria;c__Alphaproteobacteria;o__Rhizobiales;f__Beijerinckiaceae;g__Bosea	s__Bosea vaviloviae
GCF_001742145.1	NZ_CP015749.1	99.96	5030841	5030841	d__Bacteria;p__Proteobacteria;c__Gammaproteobacteria;o__Enterobacterales;f__Enterobacteriaceae;g__Pectobacterium	s__Pectobacterium parmentieri
GCF_001742185.1	NZ_CP015750.1	99.33	5043228	5043228	d__Bacteria;p__Proteobacteria;c__Gammaproteobacteria;o__Enterobacterales;f__Enterobacteriaceae;g__Pectobacterium	s__Pectobacterium wasabiae
GCF_001742225.1	NZ_CP017075.1	99.93	6918128	3778345	d__Bacteria;p__Proteobacteria;c__Alphaproteobacteria;o__Sphingomonadales;f__Sphingomonadaceae;g__Novosphingobium	s__Novosphingobium resinovorum
GCF_001746835.1	NZ_CP016094.1	99.32	4199284	4199284	d__Bacteria;p__Verrucomicrobiota;c__Verrucomicrobiae;o__Opitutales;f__Opitutaceae;g__Lacunisphaera	s__Lacunisphaera limnophila
GCF_001747405.1	NZ_CP017305.1	99.18	2797276	2797276	d__Bacteria;p__Bacteroidota;c__Chlorobia;o__Chlorobiales;f__Chlorobiaceae;g__Chlorobaculum	s__Chlorobaculum limnaeum
GCF_001747425.1	NZ_CP014859.1	100	6306386	6306386	d__Bacteria;p__Actinobacteriota;c__Actinobacteria;o__Mycobacteriales;f__Pseudonocardiaceae;g__Actinoalloteichus	s__Actinoalloteichus hymeniacidonis
GCF_001750105.1	NZ_CP014143.1	99.14	3864326	3864326	d__Bacteria;p__Proteobacteria;c__Gammaproteobacteria;o__Pseudomonadales;f__Cellvibrionaceae;g__Microbulbifer	s__Microbulbifer aggregans
GCF_001750145.1	NZ_CP015732.1	99.71	4792631	4386369	d__Bacteria;p__Actinobacteriota;c__Actinobacteria;o__Actinomycetales;f__Micrococcaceae;g__Arthrobacter_I	s__Arthrobacter_I sp001750145
GCF_001750685.1	NZ_CP017269.1	99.29	5817221	5792634	d__Bacteria;p__Firmicutes_A;c__Clostridia;o__Peptostreptococcales;f__Thermotaleaceae;g__Geosporobacter	s__Geosporobacter ferrireducens
GCF_001750725.1	NZ_CP017279.1	99.87	4952770	4857439	d__Bacteria;p__Proteobacteria;c__Gammaproteobacteria;o__Enterobacterales;f__Enterobacteriaceae;g__Enterobacter	s__Enterobacter ludwigii
GCF_001753205.1	NZ_CP017560.1	96.69	3436578	3436578	d__Bacteria;p__Firmicutes;c__Bacilli;o__Bacillales_A;f__Planococcaceae;g__Lysinibacillus_D	s__Lysinibacillus_D sphaericus
GCF_001753245.1	NZ_CP017415.1	99.27	3566941	3566941	d__Bacteria;p__Proteobacteria;c__Gammaproteobacteria;o__Ectothiorhodospirales;f__Acidihalobacteraceae;g__Acidihalobacter	s__Acidihalobacter prosperus_A
GCF_001761325.1	NZ_CP017478.1	98.99	3426122	3426122	d__Bacteria;p__Bacteroidota;c__Bacteroidia;o__Flavobacteriales;f__Flavobacteriaceae;g__LPB0138	s__LPB0138 sp001761325
GCF_001761365.1	NZ_CP017477.1	99.66	3809314	3809314	d__Bacteria;p__Bacteroidota;c__Bacteroidia;o__Flavobacteriales;f__Flavobacteriaceae;g__Polaribacter	s__Polaribacter vadi
GCF_001761385.1	NZ_CP017476.1	99.45	4944132	4944132	d__Bacteria;p__Proteobacteria;c__Gammaproteobacteria;o__Burkholderiales;f__Burkholderiaceae;g__Hydrogenophaga	s__Hydrogenophaga crassostreae
GCF_001761465.1	NZ_CP017479.1	98.94	4402594	4402594	d__Bacteria;p__Bacteroidota;c__Bacteroidia;o__Flavobacteriales;f__Flavobacteriaceae;g__Flavobacterium	s__Flavobacterium gilvum
GCF_001766235.1	NZ_CP015164.1	99.5	2999217	2859878	d__Bacteria;p__Proteobacteria;c__Alphaproteobacteria;o__Acetobacterales;f__Acetobacteraceae;g__Acetobacter	s__Acetobacter ascendens
GCF_001767235.1	NZ_CP017599.1	99.26	9708656	9673108	d__Bacteria;p__Cyanobacteria;c__Cyanobacteriia;o__Cyanobacteriales;f__Coleofasciculaceae;g__Moorea	s__Moorea producens_A
GCF_001767255.1	NZ_CP017639.1	99.12	2365449	2365449	d__Bacteria;p__Actinobacteriota;c__Actinobacteria;o__Mycobacteriales;f__Mycobacteriaceae;g__Corynebacterium	s__Corynebacterium sp001767255
GCF_001767295.1	NZ_CP014944.1	99.14	4683314	4683314	d__Bacteria;p__Proteobacteria;c__Gammaproteobacteria;o__Enterobacterales;f__Alteromonadaceae;g__Colwellia	s__Colwellia sp001767295
GCF_001767395.1	NZ_CP017014.1	99.28	4444448	4444448	d__Bacteria;p__Actinobacteriota;c__Actinobacteria;o__Mycobacteriales;f__Mycobacteriaceae;g__Rhodococcus	s__Rhodococcus sp001767395
GCF_001787335.1	NZ_CP014674.1	99.63	3505604	2888029	d__Bacteria;p__Proteobacteria;c__Alphaproteobacteria;o__Acetobacterales;f__Acetobacteraceae;g__Kozakia	s__Kozakia baliensis
GCF_001792815.1	NZ_CP017674.1	98.89	3508491	3508491	d__Bacteria;p__Actinobacteriota;c__Actinobacteria;o__Actinomycetales;f__Microbacteriaceae;g__Microbacterium	s__Microbacterium sp001792815
GCF_001806325.1	NZ_CP017580.1	98.99	3795948	3795948	d__Bacteria;p__Actinobacteriota;c__Actinobacteria;o__Actinomycetales;f__Microbacteriaceae;g__Curtobacterium	s__Curtobacterium sp001806325
GCF_001808185.1	NZ_CP017668.1	100	3788814	3788814	d__Bacteria;p__Proteobacteria;c__Gammaproteobacteria;o__Burkholderiales;f__Chitinibacteraceae;g__Jeongeupia	s__Jeongeupia sp001808185
GCF_001831475.1	NZ_CP017688.1	99.65	3027315	3027315	d__Bacteria;p__Bacteroidota;c__Bacteroidia;o__Flavobacteriales;f__Flavobacteriaceae;g__Flavobacterium	s__Flavobacterium crassostreae
GCF_001831495.1	NZ_CP017689.1	97.98	3861670	3861670	d__Bacteria;p__Proteobacteria;c__Gammaproteobacteria;o__Enterobacterales;f__Alteromonadaceae;g__Thalassotalea_A	s__Thalassotalea_A crassostreae
GCF_001854125.1	NZ_CP017715.1	100	4121005	4121005	d__Bacteria;p__Proteobacteria;c__Gammaproteobacteria;o__Pseudomonadales;f__Oleiphilaceae;g__Marinobacter	s__Marinobacter salinus
GCF_001854185.1	NZ_CP017603.1	99.29	4586755	4586755	d__Bacteria;p__Firmicutes_A;c__Clostridia;o__Peptostreptococcales;f__Natronincolaceae;g__Clostridium_W	s__Clostridium_W formicaceticum
GCF_001854225.1	NZ_CP015208.1	99.85	1424506	1424506	d__Bacteria;p__Actinobacteriota;c__Actinobacteria;o__Actinomycetales;f__Microbacteriaceae;g__Rhodoluna	s__Rhodoluna planktonica
GCF_001854245.1	NZ_CP015381.1	98.39	4455399	4455399	d__Bacteria;p__Desulfobacterota;c__Desulfobacteria;o__Desulfobacterales;f__Desulfococcaceae;g__Desulfococcus	s__Desulfococcus multivorans
GCF_001854405.1	NZ_CP017718.1	98.27	3628091	3628091	d__Bacteria;p__Proteobacteria;c__Alphaproteobacteria;o__Caulobacterales;f__Hyphomonadaceae;g__Henriciella	s__Henriciella sp001854405
GCF_001856665.1	NZ_CP017781.1	99.39	3780829	3462926	d__Bacteria;p__Proteobacteria;c__Alphaproteobacteria;o__Rhodobacterales;f__Rhodobacteraceae;g__LPB0142	s__LPB0142 sp001856665
GCF_001856685.1	NZ_CP017812.1	98.46	2207832	2207832	d__Bacteria;p__Actinobacteriota;c__Actinobacteria;o__Actinomycetales;f__Actinomycetaceae;g__Boudabousia	s__Boudabousia sp001856685
GCF_001857945.1	NZ_CP017770.1	99.66	4757181	4627176	d__Bacteria;p__Firmicutes_I;c__Bacilli_A;o__Paenibacillales;f__Paenibacillaceae;g__Paenibacillus	s__Paenibacillus crassostreae
GCF_001857965.1	NZ_CP017774.1	99.65	3851214	3851214	d__Bacteria;p__Bacteroidota;c__Bacteroidia;o__Flavobacteriales;f__Flavobacteriaceae;g__Flavobacterium	s__Flavobacterium commune
GCF_001865675.1	NZ_CP011319.1	99.65	6453540	6453540	d__Bacteria;p__Proteobacteria;c__Gammaproteobacteria;o__Burkholderiales;f__Burkholderiaceae;g__Janthinobacterium	s__Janthinobacterium sp001865675
GCF_001865855.1	NZ_CP017839.1	99.81	8304518	8304518	d__Bacteria;p__Actinobacteriota;c__Actinobacteria;o__Mycobacteriales;f__Mycobacteriaceae;g__Nocardia	s__Nocardia seriolae
GCF_001870205.1	NZ_CP017267.1	99.45	2184285	2169060	d__Bacteria;p__Firmicutes;c__Bacilli;o__Lactobacillales;f__Vagococcaceae;g__Vagococcus	s__Vagococcus teuberi
GCF_001870665.2	NZ_CP024899.1	98.98	3899419	3899419	d__Bacteria;p__Proteobacteria;c__Alphaproteobacteria;o__Rhodobacterales;f__Rhodobacteraceae;g__Rhodobaca	s__Rhodobaca barguzinensis
GCF_001874625.1	NZ_CP017671.1	99.46	4889093	4780676	d__Bacteria;p__Proteobacteria;c__Gammaproteobacteria;o__Enterobacterales;f__Enterobacteriaceae;g__Providencia	s__Providencia rettgeri_A
GCF_001874645.1	NZ_CP017886.1	98.78	6118567	5747498	d__Bacteria;p__Proteobacteria;c__Gammaproteobacteria;o__Pseudomonadales;f__Pseudomonadaceae;g__Pseudomonas_E	s__Pseudomonas_E frederiksbergensis_B
GCF_001877035.1	NZ_CP015756.1	98.58	4785613	4760574	d__Bacteria;p__Firmicutes_A;c__Clostridia;o__Clostridiales;f__Clostridiaceae;g__Clostridium_AD	s__Clostridium_AD estertheticum
GCF_001879645.1	NZ_CP016930.1	99.07	1827930	1824527	d__Bacteria;p__Proteobacteria;c__Gammaproteobacteria;o__Francisellales;f__Francisellaceae;g__Francisella	s__Francisella sp001879645
GCF_001880225.1	NZ_CP009654.1	99.23	1861609	1855434	d__Bacteria;p__Proteobacteria;c__Gammaproteobacteria;o__Francisellales;f__Francisellaceae;g__CA97-1460	s__CA97-1460 sp001880225
GCF_001880285.1	NZ_CP016269.1	100	3074209	3074209	d__Bacteria;p__Bacteroidota;c__Bacteroidia;o__Flavobacteriales;f__UJ101;g__UJ101	s__UJ101 sp001880285
GCF_001880325.1	NZ_CP016312.1	99.36	2388273	2035182	d__Bacteria;p__Deinococcota;c__Deinococci;o__Deinococcales;f__Thermaceae;g__Thermus	s__Thermus brockianus
GCF_001885215.1	NZ_CP018091.1	99.73	2750634	2750634	d__Bacteria;p__Cyanobacteria;c__Cyanobacteriia;o__Synechococcales;f__Cyanobiaceae;g__WH-5701	s__WH-5701 sp001885215
GCF_001885235.1	NZ_CP018093.1	98.45	1938636	1922599	d__Bacteria;p__Proteobacteria;c__Gammaproteobacteria;o__Francisellales;f__Francisellaceae;g__Francisella	s__Francisella hispaniensis
GCF_001886495.1	NZ_CP018022.1	99.37	1199621	1199621	d__Bacteria;p__Firmicutes;c__Bacilli;o__Mycoplasmatales;f__Mycoplasmataceae;g__Spiroplasma	s__Spiroplasma sp001886495
GCF_001886515.1	NZ_CP018043.1	100	6041408	6041408	d__Bacteria;p__Actinobacteriota;c__Actinobacteria;o__Mycobacteriales;f__Mycobacteriaceae;g__Mycolicibacterium	s__Mycolicibacterium sp001886515
GCF_001886615.1	NZ_CP018139.1	99.78	3543891	3543891	d__Bacteria;p__Proteobacteria;c__Gammaproteobacteria;o__Pseudomonadales;f__Halomonadaceae;g__Halomonas	s__Halomonas aestuarii
GCF_001886715.1	NZ_CP018082.1	99.81	7310115	7310115	d__Bacteria;p__Actinobacteriota;c__Actinobacteria;o__Mycobacteriales;f__Mycobacteriaceae;g__Nocardia	s__Nocardia soli_A
GCF_001886735.1	NZ_CP018076.1	98.88	4691010	3840209	d__Bacteria;p__Proteobacteria;c__Alphaproteobacteria;o__Rhodobacterales;f__Rhodobacteraceae;g__Sulfitobacter	s__Sulfitobacter sp001886735
GCF_001886815.1	NZ_CP018099.1	98.84	4978541	4978541	d__Bacteria;p__Calditrichota;c__Calditrichia;o__Calditrichales;f__Calditrichaceae;g__Caldithrix	s__Caldithrix abyssi
GCF_001886855.1	NZ_CP013197.1	98.12	1640878	1599709	d__Bacteria;p__Firmicutes;c__Bacilli;o__Mycoplasmatales;f__Mycoplasmataceae;g__Spiroplasma	s__Spiroplasma citri
GCF_001887245.1	NZ_CP018135.1	99.08	2667837	2667837	d__Bacteria;p__Actinobacteriota;c__Actinobacteria;o__Actinomycetales;f__Micrococcaceae;g__Neomicrococcus	s__Neomicrococcus aestuarii
GCF_001887285.1	NZ_CP018134.1	99.49	3410829	3410829	d__Bacteria;p__Actinobacteriota;c__Actinobacteria;o__Actinomycetales;f__Microbacteriaceae;g__Microbacterium	s__Microbacterium paludicola
GCF_001887595.1	NZ_CP017480.1	99.66	4765486	4765486	d__Bacteria;p__Proteobacteria;c__Gammaproteobacteria;o__Xanthomonadales;f__Rhodanobacteraceae;g__Luteibacter	s__Luteibacter rhizovicinus
GCF_001887775.1	NZ_CP015519.1	99.32	3218469	3218469	d__Bacteria;p__Desulfuromonadota;c__Desulfuromonadia;o__Desulfuromonadales;f__Pelobacteraceae_A;g__SFB93	s__SFB93 sp001887775
GCF_001888165.1	NZ_CP015455.1	99.03	3206049	3192352	d__Bacteria;p__Desulfuromonadota;c__Desulfuromonadia;o__Desulfuromonadales;f__Pelobacteraceae_A;g__Pelobacter_A	s__Pelobacter_A acetylenicus
GCF_001888185.1	NZ_CP016364.1	99.18	4207221	3653592	d__Bacteria;p__Proteobacteria;c__Alphaproteobacteria;o__Rhodobacterales;f__Rhodobacteraceae;g__Phaeobacter	s__Phaeobacter porticola
GCF_001888805.2	NZ_CP019113.1	98.28	4429597	4429597	d__Bacteria;p__Proteobacteria;c__Gammaproteobacteria;o__Enterobacterales;f__Enterobacteriaceae;g__Enterobacter_D	s__Enterobacter_D sp001888805
GCF_001889005.1	NZ_CP018153.1	99.62	2978889	2978889	d__Bacteria;p__Bacteroidota;c__Bacteroidia;o__Flavobacteriales;f__Flavobacteriaceae;g__Gramella	s__Gramella salexigens
GCF_001889025.1	NZ_CP018154.1	98.05	2533041	2533041	d__Bacteria;p__Proteobacteria;c__Alphaproteobacteria;o__Sphingomonadales;f__Sphingomonadaceae;g__Ga0077559	s__Ga0077559 sp001889025
GCF_001889045.1	NZ_CP018155.1	99.66	3019213	3019213	d__Bacteria;p__Bacteroidota;c__Bacteroidia;o__Flavobacteriales;f__Flavobacteriaceae;g__Tenacibaculum_A	s__Tenacibaculum_A todarodis
GCF_001889165.1	NZ_CP016020.1	98.97	4361276	4344873	d__Bacteria;p__Firmicutes;c__Bacilli;o__Bacillales;f__Bacillaceae;g__Bacillus_AY	s__Bacillus_AY weihaiensis
GCF_001889265.1	NZ_CP018151.1	99.37	3620317	3620317	d__Bacteria;p__Actinobacteriota;c__Actinobacteria;o__Actinomycetales;f__Microbacteriaceae;g__Microbacterium	s__Microbacterium sp001889265
GCF_001889305.1	NZ_CP013074.1	99.01	1521287	1521287	d__Bacteria;p__Chloroflexota;c__Dehalococcoidia;o__Dehalococcoidales;f__Dehalococcoidaceae;g__Dehalococcoides	s__Dehalococcoides mccartyi_A
GCF_001889325.1	NZ_CP013243.1	100	4393047	4393047	d__Bacteria;p__Firmicutes_A;c__Clostridia;o__Clostridiales;f__Clostridiaceae;g__Clostridium_F	s__Clostridium_F botulinum_A
GCF_001889545.1	NZ_CP018194.1	99.5	2738877	2738877	d__Bacteria;p__Proteobacteria;c__Alphaproteobacteria;o__Acetobacterales;f__Acetobacteraceae;g__Granulibacter	s__Granulibacter bethesdensis_B
GCF_001889605.1	NZ_CP018171.1	99.59	5324561	5158483	d__Bacteria;p__Proteobacteria;c__Alphaproteobacteria;o__Rhizobiales;f__Rhizobiaceae;g__B7	s__B7 sp001889605
GCF_001890385.1	NZ_CP018221.1	79.13	3787976	3381342	d__Bacteria;p__Proteobacteria;c__Alphaproteobacteria;o__Sphingomonadales;f__Sphingomonadaceae;g__JJ-A5	s__JJ-A5 sp001890385
GCF_001891125.1	NZ_CP015247.1	100	2048833	2026850	d__Bacteria;p__Firmicutes;c__Bacilli;o__Lactobacillales;f__Lactobacillaceae;g__Leuconostoc	s__Leuconostoc suionicum
GCF_001895265.1	NZ_CP016796.1	99.46	2237379	2237379	d__Bacteria;p__Proteobacteria;c__Gammaproteobacteria;o__Francisellales;f__Francisellaceae;g__Francisella	s__Francisella sp001895265
GCF_001900245.1	NZ_CP017813.1	96.99	1007172	1007172	d__Bacteria;p__Firmicutes;c__Bacilli;o__Mycoplasmatales;f__Metamycoplasmataceae;g__Mycoplasmopsis_A	s__Mycoplasmopsis_A pullorum
GCF_001908275.1	NZ_CP018620.1	99.85	7098239	7053622	d__Bacteria;p__Firmicutes_I;c__Bacilli_A;o__Paenibacillales;f__Paenibacillaceae;g__Paenibacillus	s__Paenibacillus xylanexedens
GCF_001908375.1	NZ_CP017241.1	99.72	7309118	4186145	d__Bacteria;p__Proteobacteria;c__Alphaproteobacteria;o__Rhizobiales;f__Rhizobiaceae;g__Rhizobium	s__Rhizobium etli_B
GCF_001908725.1	NZ_CP018725.1	100	5349905	5110163	d__Bacteria;p__Proteobacteria;c__Gammaproteobacteria;o__Xanthomonadales;f__Xanthomonadaceae;g__Xanthomonas	s__Xanthomonas vesicatoria
GCF_001908835.1	NZ_CP018572.1	99.39	3147211	2978145	d__Bacteria;p__Proteobacteria;c__Alphaproteobacteria;o__Rhodobacterales;f__Rhodobacteraceae;g__Marivivens	s__Marivivens sp001908835
GCF_001913135.1	NZ_CP018758.1	98.53	5386170	5271920	d__Bacteria;p__Proteobacteria;c__Gammaproteobacteria;o__Pseudomonadales;f__Pseudomonadaceae;g__Pseudomonas_B	s__Pseudomonas_B psychrotolerans
GCF_001913155.1	NZ_CP018760.1	99.01	4271158	4271158	d__Bacteria;p__Bacteroidota;c__Bacteroidia;o__Flavobacteriales;f__Flavobacteriaceae;g__Maribacter	s__Maribacter sp001913155
GCF_001922305.1	NZ_CP018839.1	99.38	3735506	3735506	d__Bacteria;p__Proteobacteria;c__Gammaproteobacteria;o__Burkholderiales;f__Rhodocyclaceae;g__Thauera	s__Thauera chlorobenzoica
GCF_001922545.1	NZ_CP018744.1	100	1156110	905638	d__Bacteria;p__Spirochaetota;c__Spirochaetia;o__Borreliales;f__Borreliaceae;g__Borreliella	s__Borreliella garinii
GCF_001931675.1	NZ_CP014839.1	99.15	4464185	4464185	d__Bacteria;p__Proteobacteria;c__Gammaproteobacteria;o__Burkholderiales;f__Burkholderiaceae;g__Pandoraea	s__Pandoraea thiooxydans
GCF_001932615.1	NZ_CP014332.1	99.23	2149545	2114163	d__Bacteria;p__Firmicutes;c__Bacilli;o__Lactobacillales;f__Lactobacillaceae;g__Weissella	s__Weissella jogaejeotgali
GCF_001936255.1	NZ_CP013704.1	100	1042690	906833	d__Bacteria;p__Spirochaetota;c__Spirochaetia;o__Borreliales;f__Borreliaceae;g__Borrelia	s__Borrelia anserina
GCF_001936335.1	NZ_CP018888.1	98.95	1610352	1610352	d__Bacteria;p__Firmicutes;c__Bacilli;o__Lactobacillales;f__Lactobacillaceae;g__Lactobacillus	s__Lactobacillus amylophilus
GCF_001940525.2	NZ_CP019437.1	99.39	4238255	3910681	d__Bacteria;p__Proteobacteria;c__Alphaproteobacteria;o__Rhodobacterales;f__Rhodobacteraceae;g__Thioclava	s__Thioclava nitratireducens
GCF_001941345.1	NZ_CP009251.1	99.34	2862233	2808767	d__Bacteria;p__Actinobacteriota;c__Actinobacteria;o__Mycobacteriales;f__Mycobacteriaceae;g__Corynebacterium	s__Corynebacterium stationis
GCF_001941425.1	NZ_CP009244.1	99.34	2790185	2790185	d__Bacteria;p__Actinobacteriota;c__Actinobacteria;o__Mycobacteriales;f__Mycobacteriaceae;g__Corynebacterium	s__Corynebacterium ammoniagenes
GCF_001941445.1	NZ_CP009245.1	99.77	2926437	2926437	d__Bacteria;p__Actinobacteriota;c__Actinobacteria;o__Mycobacteriales;f__Mycobacteriaceae;g__Corynebacterium	s__Corynebacterium aquilae
GCF_001941465.1	NZ_CP009246.1	99.78	2758653	2758653	d__Bacteria;p__Actinobacteriota;c__Actinobacteria;o__Mycobacteriales;f__Mycobacteriaceae;g__Corynebacterium	s__Corynebacterium flavescens
GCF_001941485.1	NZ_CP009247.1	100	2604152	2604152	d__Bacteria;p__Actinobacteriota;c__Actinobacteria;o__Mycobacteriales;f__Mycobacteriaceae;g__Corynebacterium	s__Corynebacterium frankenforstense
GCF_001941505.1	NZ_CP009248.1	99.4	2594799	2594799	d__Bacteria;p__Actinobacteriota;c__Actinobacteria;o__Mycobacteriales;f__Mycobacteriaceae;g__Corynebacterium	s__Corynebacterium sphenisci
GCF_001941565.1	NZ_CP009249.1	99.89	2791883	2779609	d__Bacteria;p__Actinobacteriota;c__Actinobacteria;o__Mycobacteriales;f__Mycobacteriaceae;g__Corynebacterium	s__Corynebacterium phocae
GCF_001941625.1	NZ_CP016076.1	100	7120854	7120854	d__Bacteria;p__Actinobacteriota;c__Actinobacteria;o__Mycobacteriales;f__Pseudonocardiaceae;g__Actinoalloteichus	s__Actinoalloteichus sp001941625
GCF_001941825.1	NZ_CP019038.1	99.8	7523017	6987670	d__Bacteria;p__Proteobacteria;c__Gammaproteobacteria;o__Burkholderiales;f__Burkholderiaceae;g__Massilia	s__Massilia putida
GCF_001941845.1	NZ_CP018870.1	99.46	7585034	7585034	d__Bacteria;p__Actinobacteriota;c__Actinobacteria;o__Streptomycetales;f__Streptomycetaceae;g__Streptomyces	s__Streptomyces sp001941845
GCF_001941865.1	NZ_CP016162.1	99.76	5340293	5340293	d__Bacteria;p__Proteobacteria;c__Gammaproteobacteria;o__Pseudomonadales;f__Pseudomonadaceae;g__Pseudomonas_E	s__Pseudomonas_E alcaliphila_B
GCF_001945665.1	NZ_CP015780.1	100	1311545	904387	d__Bacteria;p__Spirochaetota;c__Spirochaetia;o__Borreliales;f__Borreliaceae;g__Borreliella	s__Borreliella mayonii
GCF_001951155.1	NZ_CP016359.1	99.49	4007868	4007868	d__Bacteria;p__Bacteroidota;c__Bacteroidia;o__Flavobacteriales;f__Flavobacteriaceae;g__Gramella	s__Gramella flava
GCF_001952815.1	NZ_CP019158.1	99.84	6357185	6357185	d__Bacteria;p__Bacteroidota;c__Bacteroidia;o__Sphingobacteriales;f__Sphingobacteriaceae;g__Sphingobacterium	s__Sphingobacterium sp001952815
GCF_001953055.1	NZ_CP019044.1	100	3357577	3357577	d__Bacteria;p__Proteobacteria;c__Alphaproteobacteria;o__Rhizobiales;f__Rhizobiaceae;g__Nitratireductor_B	s__Nitratireductor_B basaltis
GCF_001953175.1	NZ_CP018258.1	95.71	2092789	2092789	d__Bacteria;p__Chloroflexota;c__Dehalococcoidia;o__Dehalococcoidales;f__Dehalococcoidaceae;g__Dehalogenimonas	s__Dehalogenimonas formicexedens
GCF_001953215.1	NZ_CP019169.1	99.37	4806848	4806848	d__Bacteria;p__Proteobacteria;c__Gammaproteobacteria;o__Burkholderiales;f__UKL13-2;g__GR16-43	s__GR16-43 sp001953215
GCF_001955695.1	NZ_CP019236.1	99.84	5895641	5800473	d__Bacteria;p__Proteobacteria;c__Gammaproteobacteria;o__Burkholderiales;f__Burkholderiaceae;g__Albidiferax	s__Albidiferax koreense
GCF_001955715.1	NZ_CP019239.1	99.84	4264855	4264855	d__Bacteria;p__Proteobacteria;c__Gammaproteobacteria;o__Burkholderiales;f__Burkholderiaceae;g__Rhodoferax	s__Rhodoferax saidenbachensis
GCF_001956695.1	NZ_CP019070.1	99.59	2866429	2866429	d__Bacteria;p__Campylobacterota;c__Campylobacteria;o__Campylobacterales;f__Arcobacteraceae;g__Poseidonibacter	s__Poseidonibacter sp001956695
GCF_001956985.1	NZ_CP019082.1	98.45	7651896	7497544	d__Bacteria;p__Planctomycetota;c__Planctomycetes;o__Isosphaerales;f__Isosphaeraceae;g__Paludisphaera	s__Paludisphaera borealis
GCF_001969265.1	NZ_CP019304.1	99.71	5041568	5041568	d__Bacteria;p__Actinobacteriota;c__Actinobacteria;o__Actinomycetales;f__Micrococcaceae;g__Arthrobacter	s__Arthrobacter sp001969265
GCF_001969365.1	NZ_CP019312.1	99.25	4315457	3861636	d__Bacteria;p__Proteobacteria;c__Alphaproteobacteria;o__Rhodobacterales;f__Rhodobacteraceae;g__Tateyamaria	s__Tateyamaria omphalii
GCF_001969385.1	NZ_CP014796.1	99.17	5424264	4609584	d__Bacteria;p__Proteobacteria;c__Alphaproteobacteria;o__Rhodobacterales;f__Rhodobacteraceae;g__Salipiger	s__Salipiger profundus
GCF_001969445.1	NZ_CP017297.1	98.64	4385603	4385603	d__Bacteria;p__Actinobacteriota;c__Actinobacteria;o__Actinomycetales;f__Dermabacteraceae;g__Brachybacterium	s__Brachybacterium sp001969445
GCF_001971585.1	NZ_CP019323.1	99.48	2534178	2506167	d__Bacteria;p__Firmicutes;c__Bacilli;o__Lactobacillales;f__Lactobacillaceae;g__Lactobacillus_K	s__Lactobacillus_K allii
GCF_001971605.1	NZ_CP013916.1	99.59	3938206	3781071	d__Bacteria;p__Proteobacteria;c__Alphaproteobacteria;o__Sphingomonadales;f__Sphingomonadaceae;g__Sphingomonas	s__Sphingomonas sp001971605
GCF_001971685.1	NZ_CP019326.1	100	4129523	4129523	d__Bacteria;p__Proteobacteria;c__Gammaproteobacteria;o__Pseudomonadales;f__Halomonadaceae;g__Halomonas_B	s__Halomonas_B sp001971685
GCF_001971725.1	NZ_CP019388.1	99.34	3349669	3349669	d__Bacteria;p__Bacteroidota;c__Bacteroidia;o__Flavobacteriales;f__Flavobacteriaceae;g__Winogradskyella	s__Winogradskyella sp001971725
GCF_001971745.1	NZ_CP019352.1	99.67	3192399	3192399	d__Bacteria;p__Bacteroidota;c__Bacteroidia;o__Flavobacteriales;f__Flavobacteriaceae;g__Lacinutrix	s__Lacinutrix venerupis
GCF_001971785.1	NZ_CP019389.1	98.35	3752836	3752836	d__Bacteria;p__Bacteroidota;c__Bacteroidia;o__Flavobacteriales;f__Flavobacteriaceae;g__Seonamhaeicola	s__Seonamhaeicola sp001971785
GCF_001974985.1	NZ_CP018762.1	99.37	3424892	3424892	d__Bacteria;p__Actinobacteriota;c__Actinobacteria;o__Actinomycetales;f__Microbacteriaceae;g__Microbacterium	s__Microbacterium aurum
GCF_001975025.1	NZ_CP015588.1	100	8625867	8625867	d__Bacteria;p__Actinobacteriota;c__Actinobacteria;o__Streptomycetales;f__Streptomycetaceae;g__Streptomyces	s__Streptomyces alfalfae
GCF_001975225.1	NZ_CP019445.1	99.12	4857324	4646998	d__Bacteria;p__Proteobacteria;c__Gammaproteobacteria;o__Enterobacterales;f__Enterobacteriaceae;g__Kosakonia	s__Kosakonia cowanii
GCF_001975665.1	NZ_CP019419.1	98.99	4125014	4125014	d__Bacteria;p__Bacteroidota;c__Bacteroidia;o__Flavobacteriales;f__Flavobacteriaceae;g__Polaribacter	s__Polaribacter reichenbachii
GCF_001975685.1	NZ_CP019433.1	99.45	2300992	2300992	d__Bacteria;p__Firmicutes;c__Bacilli;o__Lactobacillales;f__Aerococcaceae;g__Jeotgalibaca	s__Jeotgalibaca sp001975685
GCF_001975705.1	NZ_CP015093.1	99.6	5259072	4246390	d__Bacteria;p__Proteobacteria;c__Alphaproteobacteria;o__Rhodobacterales;f__Rhodobacteraceae;g__Salipiger	s__Salipiger abyssi
GCF_001983935.1	NZ_CP017641.1	96.6	8920478	8920478	d__Bacteria;p__Planctomycetota;c__Planctomycetes;o__Planctomycetales;f__Planctomycetaceae;g__Fuerstia	s__Fuerstia marisgermanicae
GCF_001983955.1	NZ_CP019562.1	99.87	1966910	1966910	d__Bacteria;p__Firmicutes;c__Bacilli;o__Lactobacillales;f__Streptococcaceae;g__Streptococcus	s__Streptococcus oralis_H
GCF_001983975.1	NZ_CP019458.1	100	10184660	10029028	d__Bacteria;p__Actinobacteriota;c__Actinobacteria;o__Streptomycetales;f__Streptomycetaceae;g__Streptomyces	s__Streptomyces autolyticus
GCF_001983995.1	NZ_CP019450.1	99.04	4116357	4085301	d__Bacteria;p__Proteobacteria;c__Gammaproteobacteria;o__Pseudomonadales;f__Halieaceae;g__Halioglobus	s__Halioglobus japonicus
GCF_001984015.1	NZ_CP019572.1	97.57	5665081	5665081	d__Bacteria;p__Actinobacteriota;c__Actinobacteria;o__Mycobacteriales;f__Mycobacteriaceae;g__Rhodococcus	s__Rhodococcus sp001984015
GCF_001984035.1	NZ_CP019449.1	99.52	4285026	4285026	d__Bacteria;p__Proteobacteria;c__Alphaproteobacteria;o__Sphingomonadales;f__Sphingomonadaceae;g__Sphingopyxis	s__Sphingopyxis sp001984035
GCF_001988955.1	NZ_CP014263.1	100	5797678	5797678	d__Bacteria;p__Bacteroidota;c__Bacteroidia;o__Cytophagales;f__Spirosomaceae;g__Spirosoma	s__Spirosoma montaniterrae
GCF_001989575.1	NZ_CP019573.1	95.29	1745789	1745789	d__Bacteria;p__Firmicutes;c__Bacilli;o__Staphylococcales;f__Auricoccaceae;g__Auricoccus	s__Auricoccus indicus
GCF_001997295.1	NZ_CP019605.1	98.25	3222890	3222890	d__Bacteria;p__Actinobacteriota;c__Actinobacteria;o__Propionibacteriales;f__Propionibacteriaceae;g__Tessaracoccus	s__Tessaracoccus flavus
GCF_001997345.1	NZ_CP019606.1	96.99	3934699	3934699	d__Bacteria;p__Actinobacteriota;c__Actinobacteria;o__Propionibacteriales;f__Propionibacteriaceae;g__Tessaracoccus	s__Tessaracoccus aquimaris
GCF_001997385.1	NZ_CP019633.1	98.86	2951611	2951611	d__Bacteria;p__Planctomycetota;c__Phycisphaerae;o__SG8-4;f__SM-Chi-D1;g__ST-PulAB-D4	s__ST-PulAB-D4 sp001997385
GCF_001998865.1	NZ_CP019607.1	98.25	3650768	3603805	d__Bacteria;p__Actinobacteriota;c__Actinobacteria;o__Propionibacteriales;f__Propionibacteriaceae;g__Tessaracoccus	s__Tessaracoccus flavescens
GCF_001998885.1	NZ_CP019609.1	99.45	2365304	2365304	d__Bacteria;p__Firmicutes;c__Bacilli;o__Lactobacillales;f__Vagococcaceae;g__Vagococcus	s__Vagococcus penaei
GCF_001999225.1	NZ_CP019628.1	100	4594697	4594697	d__Bacteria;p__Proteobacteria;c__Gammaproteobacteria;o__Enterobacterales;f__Alteromonadaceae;g__Pseudoalteromonas	s__Pseudoalteromonas aliena
GCF_001999245.1	NZ_CP019630.1	99.68	6650994	6149397	d__Bacteria;p__Proteobacteria;c__Alphaproteobacteria;o__Rhizobiales;f__Stappiaceae;g__Labrenzia	s__Labrenzia aggregata_A
GCF_001999905.1	NZ_CP019640.1	98.84	4149733	3718896	d__Bacteria;p__Firmicutes;c__Bacilli;o__Bacillales_A;f__Planococcaceae;g__Planococcus	s__Planococcus maritimus
GCF_001999945.1	NZ_CP019650.1	99.14	4255625	4255625	d__Bacteria;p__Proteobacteria;c__Gammaproteobacteria;o__Pseudomonadales;f__Cellvibrionaceae;g__Microbulbifer	s__Microbulbifer agarilyticus_A
GCF_001999985.1	NZ_CP019645.1	96.87	2620399	2620399	d__Bacteria;p__Campylobacterota;c__Campylobacteria;o__Campylobacterales;f__Helicobacteraceae;g__Helicobacter_A	s__Helicobacter_A bilis_A
GCF_002000985.1	NZ_CP018822.1	100	2492900	2492900	d__Bacteria;p__Firmicutes;c__Bacilli;o__Lactobacillales;f__Streptococcaceae;g__Streptococcus	s__Streptococcus gallolyticus
GCF_002002865.1	NZ_CP019508.1	100	3564519	3564519	d__Bacteria;p__Proteobacteria;c__Alphaproteobacteria;o__Caulobacterales;f__Caulobacteraceae;g__Brevundimonas	s__Brevundimonas sp002002865
GCF_002002885.1	NZ_CP019510.1	99.65	6288464	6288464	d__Bacteria;p__Proteobacteria;c__Gammaproteobacteria;o__Burkholderiales;f__Burkholderiaceae;g__Janthinobacterium	s__Janthinobacterium sp002002885
GCF_002002905.1	NZ_CP019509.1	99.57	3962240	3962240	d__Bacteria;p__Proteobacteria;c__Gammaproteobacteria;o__Burkholderiales;f__Aquaspirillaceae;g__Rivicola	s__Rivicola sp002002905
GCF_002002925.1	NZ_CP019511.1	99.57	4155514	4155514	d__Bacteria;p__Proteobacteria;c__Alphaproteobacteria;o__Sphingomonadales;f__Sphingomonadaceae;g__Sphingomonas	s__Sphingomonas sp002002925
GCF_002003265.1	NZ_CP019687.1	99	4289950	4289950	d__Bacteria;p__Firmicutes_I;c__Bacilli_A;o__Paenibacillales;f__Paenibacillaceae;g__Paenibacillus_H	s__Paenibacillus_H larvae
GCF_002005145.1	NZ_CP019698.1	99.91	3240180	3240180	d__Bacteria;p__Firmicutes_B;c__Desulfotomaculia;o__Desulfotomaculales;f__Desulfotomaculaceae;g__Desulfotomaculum_H	s__Desulfotomaculum_H ferrireducens
GCF_002005165.1	NZ_CP019699.1	98.08	3629225	3629225	d__Bacteria;p__Firmicutes_I;c__Bacilli_A;o__Thermoactinomycetales;f__Novibacillaceae;g__Novibacillus	s__Novibacillus thermophilus
GCF_002005225.1	NZ_CP019724.1	100	8550793	8550793	d__Bacteria;p__Actinobacteriota;c__Actinobacteria;o__Streptomycetales;f__Streptomycetaceae;g__Streptomyces	s__Streptomyces pactum
GCF_002005305.1	NZ_CP014782.1	99.47	6353406	6353406	d__Bacteria;p__Proteobacteria;c__Gammaproteobacteria;o__Enterobacterales;f__Shewanellaceae;g__Shewanella	s__Shewanella psychrophila
GCF_002005365.1	NZ_CP019697.1	95.89	2688496	2688496	d__Bacteria;p__Proteobacteria;c__Gammaproteobacteria;o__Burkholderiales;f__Burkholderiaceae;g__Paenalcaligenes	s__Paenalcaligenes hominis
GCF_002005405.1	NZ_CP019728.1	98.91	2116498	2096058	d__Bacteria;p__Firmicutes;c__Bacilli;o__Lactobacillales;f__Aerococcaceae;g__Jeotgalibaca	s__Jeotgalibaca dankookensis
GCF_002005425.1	NZ_CP019704.1	99.33	3254403	3254403	d__Bacteria;p__Bacteroidota;c__Bacteroidia;o__Flavobacteriales;f__Flavobacteriaceae;g__Polaribacter	s__Polaribacter sp002005425
GCF_002005445.1	NZ_CP014692.1	99.9	3725037	3725037	d__Bacteria;p__Proteobacteria;c__Alphaproteobacteria;o__Acetobacterales;f__Acetobacteraceae;g__Acetobacter	s__Acetobacter aceti_B
GCF_002005465.1	NZ_CP014691.1	100	3407860	3407860	d__Bacteria;p__Proteobacteria;c__Alphaproteobacteria;o__Acetobacterales;f__Acetobacteraceae;g__Neoasaia	s__Neoasaia chiangmaiensis
GCF_002007485.1	NZ_CP015820.1	100	2601172	2601172	d__Bacteria;p__Proteobacteria;c__Alphaproteobacteria;o__Rhizobiales;f__Rhizobiaceae;g__Bartonella	s__Bartonella apis_A
GCF_002007565.1	NZ_CP015625.1	100	2907212	2907212	d__Bacteria;p__Proteobacteria;c__Alphaproteobacteria;o__Rhizobiales;f__Rhizobiaceae;g__Bartonella	s__Bartonella apis_B
GCF_002007605.1	NZ_CP019799.1	100	4705304	4705304	d__Bacteria;p__Proteobacteria;c__Gammaproteobacteria;o__Pseudomonadales;f__Cellvibrionaceae;g__Cellvibrio	s__Cellvibrio sp002007605
GCF_002007785.1	NZ_CP019856.1	99.93	6581295	6581295	d__Bacteria;p__Proteobacteria;c__Gammaproteobacteria;o__Pseudomonadales;f__Pseudomonadaceae;g__Pseudomonas_E	s__Pseudomonas_E azotoformans_B
GCF_002009175.1	NZ_CP018047.1	99.49	7990492	7990492	d__Bacteria;p__Actinobacteriota;c__Actinobacteria;o__Streptomycetales;f__Streptomycetaceae;g__Streptomyces	s__Streptomyces niveus_A
GCF_002009425.1	NZ_CP019936.1	99.94	4790451	4790451	d__Bacteria;p__Proteobacteria;c__Gammaproteobacteria;o__Chromatiales;f__Sedimenticolaceae;g__41T-STBD-0c-01a	s__41T-STBD-0c-01a sp002009425
GCF_002021815.1	NZ_CP019952.1	100	4690783	4690783	d__Bacteria;p__Proteobacteria;c__Gammaproteobacteria;o__Pseudomonadales;f__Pseudomonadaceae;g__Pseudomonas_E	s__Pseudomonas_E parafulva_B
GCF_002021925.1	NZ_CP012546.1	98.12	1782665	1782665	d__Bacteria;p__Campylobacterota;c__Campylobacteria;o__Campylobacterales;f__Campylobacteraceae;g__Campylobacter_A	s__Campylobacter_A pinnipediorum
GCF_002022005.1	NZ_CP017258.1	98.31	1758337	1758337	d__Bacteria;p__Campylobacterota;c__Campylobacteria;o__Campylobacterales;f__Campylobacteraceae;g__Campylobacter_A	s__Campylobacter_A pinnipediorum_A
GCF_002022505.1	NZ_CP019781.1	98.77	1762996	1762996	d__Bacteria;p__Proteobacteria;c__Alphaproteobacteria;o__Rhizobiales;f__Rhizobiaceae;g__Bartonella	s__Bartonella sp002022505
GCF_002022665.1	NZ_CP019788.1	99.06	1493693	1493693	d__Bacteria;p__Proteobacteria;c__Alphaproteobacteria;o__Rhizobiales;f__Rhizobiaceae;g__Bartonella	s__Bartonella sp002022665
GCF_002023665.2	NZ_CP023401.1	100	4058311	4058311	d__Bacteria;p__Bacteroidota;c__Bacteroidia;o__Flavobacteriales;f__Weeksellaceae;g__Elizabethkingia	s__Elizabethkingia anophelis
GCF_002024805.1	NZ_CP014337.1	100	4433522	4433522	d__Bacteria;p__Bacteroidota;c__Bacteroidia;o__Flavobacteriales;f__Weeksellaceae;g__Elizabethkingia	s__Elizabethkingia bruuniana
GCF_002025205.1	NZ_CP019947.1	99.85	5040792	5040792	d__Bacteria;p__Proteobacteria;c__Gammaproteobacteria;o__Pseudomonadales;f__Pseudomonadaceae;g__Pseudomonas_E	s__Pseudomonas_E sp002025205
GCF_002025645.1	NZ_CP018783.1	99.19	4541048	3973750	d__Bacteria;p__Actinobacteriota;c__Actinobacteria;o__Actinomycetales;f__Microbacteriaceae;g__Curtobacterium	s__Curtobacterium pusillum
GCF_002025665.1	NZ_CP018786.1	100	5314748	5314748	d__Bacteria;p__Bacteroidota;c__Bacteroidia;o__Flavobacteriales;f__Weeksellaceae;g__Chryseobacterium	s__Chryseobacterium indologenes_F
GCF_002025705.1	NZ_CP018846.1	100	6137024	6137024	d__Bacteria;p__Proteobacteria;c__Gammaproteobacteria;o__Pseudomonadales;f__Pseudomonadaceae;g__Pseudomonas_E	s__Pseudomonas_E putida_J
GCF_002028405.1	NZ_CP020046.1	100	3343428	3301026	d__Bacteria;p__Proteobacteria;c__Gammaproteobacteria;o__Burkholderiales;f__Burkholderiaceae;g__Thiomonas	s__Thiomonas intermedia
GCF_002043005.1	NZ_CP020330.1	99.42	5693067	4671477	d__Bacteria;p__Proteobacteria;c__Alphaproteobacteria;o__Rhizobiales;f__Rhizobiaceae;g__Martelella	s__Martelella mediterranea
GCF_002055535.1	NZ_LN831034.1	100	1914862	1914862	d__Bacteria;p__Firmicutes;c__Bacilli;o__Lactobacillales;f__Streptococcaceae;g__Streptococcus	s__Streptococcus pyogenes
GCF_002056295.1	NZ_CP020100.1	100	4035153	4035153	d__Bacteria;p__Proteobacteria;c__Gammaproteobacteria;o__Pseudomonadales;f__Pseudomonadaceae;g__Pseudomonas_D	s__Pseudomonas_D sp002056295
GCF_002056725.1	NZ_CP020121.1	97.52	3547915	3547915	d__Bacteria;p__Proteobacteria;c__Gammaproteobacteria;o__Burkholderiales;f__Burkholderiaceae;g__Comamonas	s__Comamonas kerstersii
GCF_002056795.1	NZ_CP020104.1	100	7959595	7959595	d__Bacteria;p__Bacteroidota;c__Bacteroidia;o__Cytophagales;f__Spirosomaceae;g__Spirosoma	s__Spirosoma aerolatum
GCF_002067135.1	NZ_CP020105.1	100	5828404	5828404	d__Bacteria;p__Bacteroidota;c__Bacteroidia;o__Cytophagales;f__Spirosomaceae;g__Spirosoma	s__Spirosoma rigui
GCF_002073975.1	NZ_CP020384.1	99.29	4162560	3860570	d__Bacteria;p__Proteobacteria;c__Alphaproteobacteria;o__Rhodobacterales;f__Rhodobacteraceae;g__Rhodovulum	s__Rhodovulum sp002073975
GCF_002075795.1	NZ_CP020472.1	99.47	4975677	4975677	d__Bacteria;p__Proteobacteria;c__Gammaproteobacteria;o__Enterobacterales;f__Shewanellaceae;g__Shewanella	s__Shewanella japonica
GCF_002076895.1	NZ_CP020465.1	99.66	4661274	4661274	d__Bacteria;p__Proteobacteria;c__Gammaproteobacteria;o__Enterobacterales;f__Alteromonadaceae;g__Colwellia	s__Colwellia beringensis
GCF_002077155.1	NZ_CP015027.1	99.33	3235441	3235441	d__Bacteria;p__Firmicutes;c__Bacilli;o__Bacillales_A;f__Planococcaceae;g__Sporosarcina	s__Sporosarcina sp002077155
GCF_002077175.1	NZ_CP014943.1	99.66	4884300	4884300	d__Bacteria;p__Proteobacteria;c__Gammaproteobacteria;o__Enterobacterales;f__Alteromonadaceae;g__Colwellia	s__Colwellia sp002077175
GCF_002079305.1	NZ_CP015039.1	99.7	4473545	4137334	d__Bacteria;p__Proteobacteria;c__Alphaproteobacteria;o__Rhodobacterales;f__Rhodobacteraceae;g__Rhodovulum	s__Rhodovulum sp002079305
GCF_002080395.1	NZ_CP020478.1	99.69	1871495	1758726	d__Bacteria;p__Campylobacterota;c__Campylobacteria;o__Campylobacterales;f__Campylobacteraceae;g__Campylobacter_D	s__Campylobacter_D helveticus
GCF_002080415.1	NZ_CP020474.1	99.3	4381426	4170996	d__Bacteria;p__Proteobacteria;c__Alphaproteobacteria;o__Rhodobacterales;f__Rhodobacteraceae;g__Roseovarius	s__Roseovarius mucosus_A
GCF_002080435.1	NZ_CP020538.1	98.86	4240798	2919834	d__Bacteria;p__Proteobacteria;c__Alphaproteobacteria;o__Sphingomonadales;f__Sphingomonadaceae;g__Sphingobium	s__Sphingobium herbicidovorans
GCF_002080455.1	NZ_CP020555.1	99.58	8110698	7983613	d__Bacteria;p__Actinobacteriota;c__Actinobacteria;o__Streptomycetales;f__Streptomycetaceae;g__Streptomyces	s__Streptomyces sp002080455
GCF_002082015.1	NZ_CP015109.1	99.33	3412428	3412428	d__Bacteria;p__Firmicutes;c__Bacilli;o__Bacillales_A;f__Planococcaceae;g__Sporosarcina	s__Sporosarcina ureae_A
GCF_002082195.1	NZ_CP020569.1	99.56	8482298	8482298	d__Bacteria;p__Actinobacteriota;c__Actinobacteria;o__Streptomycetales;f__Streptomycetaceae;g__Streptomyces	s__Streptomyces gilvosporeus
GCF_002082565.1	NZ_CP020562.1	100	4158464	4158464	d__Bacteria;p__Proteobacteria;c__Gammaproteobacteria;o__Pseudomonadales;f__Halomonadaceae;g__Halomonas	s__Halomonas sp002082565
GCF_002082585.1	NZ_CP020563.1	99.93	8027788	8027788	d__Bacteria;p__Actinobacteriota;c__Actinobacteria;o__Streptomycetales;f__Streptomycetaceae;g__Streptomyces	s__Streptomyces albolonga
GCF_002095975.1	NZ_CP020771.1	99.67	5139339	5139339	d__Bacteria;p__Cyanobacteria;c__Cyanobacteriia;o__Cyanobacteriales;f__Microcystaceae;g__Microcystis	s__Microcystis aeruginosa_A
GCF_002096055.1	NZ_CP020715.1	99.24	4351649	4061502	d__Bacteria;p__Actinobacteriota;c__Actinobacteria;o__Actinomycetales;f__Microbacteriaceae;g__Cnuibacter	s__Cnuibacter physcomitrellae
GCF_002097535.1	NZ_CP020772.1	100	4142697	4142697	d__Bacteria;p__Firmicutes;c__Bacilli;o__Bacillales;f__Halobacillaceae;g__Halobacillus	s__Halobacillus mangrovi
GCF_002101335.1	NZ_CP020773.1	98.86	2533115	2533115	d__Bacteria;p__Firmicutes;c__Bacilli;o__Staphylococcales;f__Staphylococcaceae;g__Staphylococcus	s__Staphylococcus lutrae
GCF_002101375.1	NZ_CP015207.1	99.33	3353765	3353765	d__Bacteria;p__Firmicutes;c__Bacilli;o__Bacillales_A;f__Planococcaceae;g__Sporosarcina	s__Sporosarcina ureae_B
GCF_002101395.1	NZ_CP019706.1	99.79	4316301	4239970	d__Bacteria;p__Proteobacteria;c__Gammaproteobacteria;o__Enterobacterales;f__Enterobacteriaceae;g__Pantoea_B	s__Pantoea_B alhagi
GCF_002104335.1	NZ_CP020867.1	99.88	1937768	1931011	d__Bacteria;p__Campylobacterota;c__Campylobacteria;o__Campylobacterales;f__Campylobacteraceae;g__Campylobacter_D	s__Campylobacter_D cuniculorum
GCF_002105535.1	NZ_CP015848.1	99.5	4551873	4551873	d__Bacteria;p__Proteobacteria;c__Alphaproteobacteria;o__Rhodospirillales_B;f__Magnetospirillaceae;g__Magnetospirillum_A	s__Magnetospirillum_A sp002105535
GCF_002105555.1	NZ_CP020612.1	98.17	3033494	2939512	d__Bacteria;p__Proteobacteria;c__Alphaproteobacteria;o__Rhodobacterales;f__Rhodobacteraceae;g__Paracoccus	s__Paracoccus contaminans
GCF_002105755.1	NZ_CP020821.1	98.77	5581643	5581643	d__Bacteria;p__Actinobacteriota;c__Actinobacteria;o__Mycobacteriales;f__Mycobacteriaceae;g__Mycobacterium	s__Mycobacterium colombiense
GCF_002108455.1	NZ_CP015317.1	100	6408035	6408035	d__Bacteria;p__Bacteroidota;c__Bacteroidia;o__Cytophagales;f__Spirosomaceae;g__Fibrella	s__Fibrella sp002108455
GCF_002109325.1	NZ_CP015348.1	99.33	3382744	3382744	d__Bacteria;p__Firmicutes;c__Bacilli;o__Bacillales_A;f__Planococcaceae;g__Sporosarcina	s__Sporosarcina ureae_C
GCF_002109385.1	NZ_CP020814.1	98.68	4610863	4610863	d__Bacteria;p__Firmicutes;c__Bacilli;o__Bacillales;f__Bacillaceae_D;g__Bacillus_L	s__Bacillus_L krulwichiae
GCF_002113825.1	NZ_CP020873.1	97.25	2414726	2414726	d__Bacteria;p__Bacteroidota;c__Chlorobia;o__Chlorobiales;f__Chlorobiaceae;g__Prosthecochloris	s__Prosthecochloris sp002113825
GCF_002116905.1	NZ_CP015118.1	100	6398096	6398096	d__Bacteria;p__Proteobacteria;c__Gammaproteobacteria;o__Burkholderiales;f__Burkholderiaceae;g__Rhizobacter	s__Rhizobacter gummiphilus
GCF_002117005.1	NZ_CP021023.1	98.86	3192293	3192293	d__Bacteria;p__Planctomycetota;c__Phycisphaerae;o__SG8-4;f__SM-Chi-D1;g__ST-PulAB-D4	s__ST-PulAB-D4 sp002117005
GCF_002117105.1	NZ_CP019343.1	99.57	4472079	4472079	d__Bacteria;p__Proteobacteria;c__Gammaproteobacteria;o__Pseudomonadales;f__Spongiibacteraceae;g__Oceanicoccus	s__Oceanicoccus sagamiensis
GCF_002117145.1	NZ_CP008743.1	78.38	1838212	1838212	d__Bacteria;p__Proteobacteria;c__Alphaproteobacteria;o__Caedimonadales;f__Nucleicultricaceae;g__Nucleicultrix	s__Nucleicultrix amoebiphila
GCF_002117405.1	NZ_CP019948.1	97.81	4707971	4532950	d__Bacteria;p__Proteobacteria;c__Alphaproteobacteria;o__Rhizobiales;f__Beijerinckiaceae;g__Methylocystis	s__Methylocystis bryophila
GCF_002117445.1	NZ_CP019937.1	95.17	2713835	2452467	d__Bacteria;p__Proteobacteria;c__Alphaproteobacteria;o__Rhodobacterales;f__Rhodobacteraceae;g__Ketogulonicigenium	s__Ketogulonicigenium robustum
GCF_002117485.1	NZ_CP021030.1	99.94	6686318	4494223	d__Bacteria;p__Proteobacteria;c__Alphaproteobacteria;o__Rhizobiales;f__Rhizobiaceae;g__Rhizobium	s__Rhizobium sp002117485
GCF_002119605.1	NZ_CP020705.1	98.66	2069994	2069994	d__Bacteria;p__Firmicutes_A;c__Clostridia;o__Oscillospirales;f__Acutalibacteraceae;g__UBA4871	s__UBA4871 sp002119605
GCF_002119665.1	NZ_CP021111.1	100	5380929	5380929	d__Bacteria;p__Proteobacteria;c__Gammaproteobacteria;o__Burkholderiales;f__Burkholderiaceae;g__Bordetella_B	s__Bordetella_B sp002119665
GCF_002119685.1	NZ_CP021108.1	100	6167536	6167536	d__Bacteria;p__Proteobacteria;c__Gammaproteobacteria;o__Burkholderiales;f__Burkholderiaceae;g__Bordetella_C	s__Bordetella_C sp002119685
GCF_002119725.1	NZ_CP021109.1	100	4587366	4587366	d__Bacteria;p__Proteobacteria;c__Gammaproteobacteria;o__Burkholderiales;f__Burkholderiaceae;g__Bordetella_C	s__Bordetella_C sp002119725
GCF_002119765.1	NZ_CP021112.1	99.37	5971615	5971615	d__Bacteria;p__Proteobacteria;c__Alphaproteobacteria;o__Rhizobiales;f__Xanthobacteraceae;g__Pseudorhodoplanes	s__Pseudorhodoplanes sinuspersici
GCF_002119805.1	NZ_CP021059.1	96.13	2363414	2363414	d__Bacteria;p__Firmicutes;c__Bacilli;o__Staphylococcales;f__Staphylococcaceae;g__Macrococcus	s__Macrococcus canis
GCF_002127965.1	NZ_CP018787.1	100	2468871	2468871	d__Bacteria;p__Proteobacteria;c__Gammaproteobacteria;o__Burkholderiales;f__Burkholderiaceae;g__Oxalobacter	s__Oxalobacter formigenes_A
GCF_002128305.1	NZ_CP021121.1	96.46	6287975	6287975	d__Bacteria;p__Actinobacteriota;c__Actinobacteria;o__Streptomycetales;f__Streptomycetaceae;g__Streptomyces	s__Streptomyces sp002128305
GCF_002138415.1	NZ_CP015612.1	99.95	4668743	4668743	d__Bacteria;p__Proteobacteria;c__Gammaproteobacteria;o__Xanthomonadales;f__Xanthomonadaceae;g__Stenotrophomonas	s__Stenotrophomonas maltophilia_G
GCF_002139855.1	NZ_CP018789.1	99.69	1640613	1634523	d__Bacteria;p__Campylobacterota;c__Campylobacteria;o__Campylobacterales;f__Campylobacteraceae;g__Campylobacter	s__Campylobacter sp002139855
GCF_002139875.1	NZ_CP018793.1	99.88	1612610	1583173	d__Bacteria;p__Campylobacterota;c__Campylobacteria;o__Campylobacterales;f__Campylobacteraceae;g__Campylobacter	s__Campylobacter sp002139875
GCF_002139915.1	NZ_CP018788.1	99.88	1593985	1593985	d__Bacteria;p__Campylobacterota;c__Campylobacteria;o__Campylobacterales;f__Campylobacteraceae;g__Campylobacter	s__Campylobacter sp002139915
GCF_002139935.1	NZ_CP015578.1	99.88	1594554	1594554	d__Bacteria;p__Campylobacterota;c__Campylobacteria;o__Campylobacterales;f__Campylobacteraceae;g__Campylobacter	s__Campylobacter lanienae
GCF_002151445.1	NZ_CP016306.1	100	4123013	4123013	d__Bacteria;p__Proteobacteria;c__Alphaproteobacteria;o__Sphingomonadales;f__Sphingomonadaceae;g__Sphingomonas_E	s__Sphingomonas_E sp002151445
GCF_002151545.1	NZ_CP021237.1	97.61	6182066	6182066	d__Bacteria;p__Bacteroidota;c__Bacteroidia;o__Sphingobacteriales;f__Sphingobacteriaceae;g__Pedobacter	s__Pedobacter sp002151545
[truncated: 813 more rows]
