# Supplementary material for: Probabilistic model based on circular statistics for quantifying coverage depth dynamics originating from DNA replication
Source: PeerJ. 2020 Mar 27;8:e8722. doi: 10.7717/peerj.8722 (PMC7104724; doi:10.7717/peerj.8722)
Supplement: Table S7 — We used Welch’s t-test for the p-value and the Benjamini-Hochberg procedure for FDR correction. p-values less than 0.05 appear in red. [file peerj-08-8722-s026.xlsx]

## Sheet: p_value_list_CCC
Supplementary table 7: Results of two comparison test of growth rate in infant cohort. We used Welch's t-test for the p-value and the Benjamini-Hochberg procedure for FDR correction. p-values less than 0.05 appear in red.
Method	comparison	specie	p-value	FDR p-value	Hedge's g
von Mises model	Mother vs 0-Month	Bifidobacterium adolescentis	0.0413485	0.082697	0.373946
von Mises model	Mother vs 4-Month	Bifidobacterium adolescentis	8.62001e-07	5e-06	0.92887
von Mises model	Mother vs 12-Month	Bifidobacterium adolescentis	0.162454	0.243682	0.25036
von Mises model	Mother vs 0-Month	Bifidobacterium breve	0.00653039	0.019591	-0.60886
von Mises model	Mother vs 4-Month	Bifidobacterium breve	0.748546	0.748546	-0.059182
von Mises model	Mother vs 12-Month	Bifidobacterium breve	0.263133	0.31576	-0.205934
PTRC	Mother vs 0-Month	Bifidobacterium adolescentis	0.000223	0.000538	1.02933
PTRC	Mother vs 4-Month	Bifidobacterium adolescentis	0.000269	0.000538	0.863803
PTRC	Mother vs 12-Month	Bifidobacterium adolescentis	1.1e-05	6.4e-05	0.925746
PTRC	Mother vs 0-Month	Bifidobacterium breve	0.866711	0.981543	-0.218213
PTRC	Mother vs 4-Month	Bifidobacterium breve	0.907616	0.981543	0.19362
PTRC	Mother vs 12-Month	Bifidobacterium breve	0.981543	0.981543	0.031975
