# Supplementary material for: Probabilistic model based on circular statistics for quantifying coverage depth dynamics originating from DNA replication
Source: PeerJ. 2020 Mar 27;8:e8722. doi: 10.7717/peerj.8722 (PMC7104724; doi:10.7717/peerj.8722)
Supplement: Table S9 — To compare the models based on their prediction performance, both AIC and BIC were computed. The lower the information criterion, the better the model fit of the data. For each dataset and criterion, the values in bold are the lowest values in the vanilla models and those in red are the lowest ones in all of the models. [file peerj-08-8722-s028.xlsx]

## Sheet: Sheet1
Supplementary table 9: Information criteria of the proposed models obtained using the data of Korem et al.. To compare the models based on their prediction performance, both AIC and BIC were computed. The lower the information criterion, the better the model fit of the data. For each dataset and criterion, the values in bold are the lowest values in the vanilla models and those in red are the low…
		extension	Vanilla						MIAE				SE		invMIAE				invSE
		model	cardioid	explinearcardioid	jonespewsey	linearcardioid	vonmises	wrappedcauchy	cardioid	jonespewsey	vonmises	wrappedcauchy	jonespewsey	vonmises	cardioid	jonespewsey	vonmises	wrappedcauchy	jonespewsey	vonmises
information criterion	species	Number of free parameter	2	2	3	2	2	2	3	4	3	3	4	3	3	4	3	3	4	3
AIC	ec		2.48517e+07	2.48516e+07	2.48512e+07	2.48522e+07	24851428	24852030	2.48517e+07	2.48518e+07	2.48519e+07	2.48541e+07	2.48509e+07	2.48508e+07	2.48517e+07	2.48511e+07	2.48513e+07	2.48519e+07	2.48508e+07	2.48508e+07
	ef		497423535	497406179	497416631	497416645	497419570	497417356	497415475	497420124	497424202	497430876	497410790	497411804	497398749	497394742	497392344	497392931	497401375	497402739
	lg		304601723	304597058	304588555	304607030	304593683	304589274	304600091	304588415	304593506	304590116	304576622	304576784	304600090	304587328	304592377	304588276	304577737	304578226
BIC	ec		2.48521e+07	2.4852e+07	2.48519e+07	2.48525e+07	2.48518e+07	2.48524e+07	2.48524e+07	2.48529e+07	2.48526e+07	2.48548e+07	2.48519e+07	2.48516e+07	24852397	2.48522e+07	2.4852e+07	2.48526e+07	2.48519e+07	2.48515e+07
	ef		497424090	497406734	497417726	497417200	497420125	497417911	497416570	497421759	497425298	497431971	497412425	497412899	497399844	497396377	497393439	497394026	497403010	497403834
	lg		304602261	304597597	304589617	304607569	304594222	304589813	304601153	304590002	304594569	304591179	304578208	304577846	304601153	304588914	304593439	304589338	304579323	304579288
Average rank			14.5	9.66667	8.16667	15	10.6667	11.6667	12.6667	12.6667	15	15.3333	4.83333	4.33333	10	5.16667	6.5	7.5	3.83333	3.5
p-value(likelihood-ratio test)	ec		×	×	1.38e-47	×	×	×	3.14e-09	4.33e-14	7.83e-18	1.97e-29	1.41e-68	2.62e-124	9.41e-08	1	1	1	4.4e-61	1.48e-116
	ef		×	×	0	×	×	×	0	0	0	0	0	0	0	1	1	1	0	0
	lg		×	×	0	×	×	×	0	1.61e-249	2.33e-266	2.25e-201	0	0	0	1.15e-26	1.33e-33	1	0	0
